# Supplementary material for: The Long Non-Coding HOTAIR Is Modulated by Cyclic Stretch and WNT/β-CATENIN in Human Aortic Valve Cells and Is a Novel Repressor of Calcification Genes
Source: PLoS One. 2014 May 1;9(5):e96577. doi: 10.1371/journal.pone.0096577 (PMC4006892; doi:10.1371/journal.pone.0096577)
Supplement: Dataset S1 — Excel file containing genes altered >1.2 fold with a p<0.05 in the HOTAIR siRNA microarray data. (XLS) [file pone.0096577.s002.xls]

## Sheet: Sheet1
PROBE_ID	SYMBOL	DEFINITION	SYNONYMS	REFSEQ_ID	ENTREZ_GENE_ID	9031313075_G	9031313075_H	9031313075_I	9031313075_J	9031313075_K	9031313075_L	statistic	log2(HOTAIR/ctr)	f(HOTAIR/ctr)
ILMN_1661861	CSF2	colony stimulating factor 2 (granulocyte-macrophage) (CSF2)	MGC131935; MGC138897; GMCSF	NM_000758.2	1437	9.70096	10.0007	9.99986	7.97039	8.17592	7.81826	-8.18759	-1.91231	-3.76412
ILMN_1746517	KYNU	kynureninase (L-kynurenine hydrolase) (KYNU), transcript variant 1		NM_003937.2	8942	7.72588	7.93369	7.85175	6.83162	6.64386	6.61324	-6.30722	-1.14087	-2.20513
ILMN_2048043	DEFB4	defensin, beta 4 (DEFB4)	DEFB102; DEFB2; SAP1; DEFB-2; HBD-2	NM_004942.2	1673	6.69627	6.98755	6.86295	5.69488	5.75756	5.86047	-5.7671	-1.07795	-2.11104
ILMN_1752562	CXCL5	chemokine (C-X-C motif) ligand 5 (CXCL5)	ENA-78; SCYB5	NM_002994.3	6374	8.89966	8.88142	8.78038	7.67101	7.98413	7.76487	-5.52219	-1.04715	-2.06644
ILMN_1737514	KYNU	kynureninase (L-kynurenine hydrolase) (KYNU), transcript variant 2		NM_001032998.1	8942	6.81121	6.93546	6.66959	5.79961	5.96116	5.7252	-5.05082	-0.976769	-1.96805
ILMN_1704418	FOXD1	forkhead box D1 (FOXD1)	FREAC4; FKHL8	NM_004472.2	2297	10.548	10.5009	10.545	9.52258	9.72485	9.54863	-6.01561	-0.932598	-1.90871
ILMN_2384745	PSG4	pregnancy specific beta-1-glycoprotein 4 (PSG4), transcript variant 1	PSG9	NM_002780.3	5672	9.19205	9.23194	9.23098	8.38198	8.38241	8.17542	-5.66112	-0.905053	-1.87261
ILMN_1688780	S100A4	S100 calcium binding protein A4 (S100A4), transcript variant 2	FSP1; MTS1; 18A2; PEL98; P9KA; CAPL; 42A	NM_019554.2	6275	8.6886	8.40173	8.42417	7.40514	7.83415	7.65893	-3.56529	-0.872092	-1.83032
ILMN_1737650	DIO2	deiodinase, iodothyronine, type II (DIO2), transcript variant 3	D2; 5DII; SelY; TXDI2	NM_001007023.2	1734	7.80478	7.57061	7.24603	6.53916	6.9331	6.69209	-2.84204	-0.819022	-1.76421
ILMN_2359211	AP2A1	adaptor-related protein complex 2, alpha 1 subunit (AP2A1), transcript variant 2	CLAPA1; AP2-ALPHA; ADTAA	NM_130787.2	160	7.42878	7.19574	7.24413	6.46597	6.54998	6.41109	-4.74856	-0.813869	-1.75792
ILMN_1695590	ADRB2	adrenergic, beta-2-, receptor, surface (ADRB2)	B2AR; BETA2AR; BAR; ADRBR; ADRB2R	NM_000024.4	154	7.6532	7.64818	7.57592	6.79701	6.90207	6.73742	-5.65273	-0.813599	-1.75759
ILMN_1767113	AOX1	aldehyde oxidase 1 (AOX1)	AO; AOH1	NM_001159.3	316	8.95391	8.9867	8.91857	8.00899	8.16189	8.29002	-4.61329	-0.799424	-1.74041
ILMN_1708580	PDZK1IP1	PDZK1 interacting protein 1 (PDZK1IP1)	DD96; RP1-18D14.5; SPAP; MAP17	NM_005764.3	10158	7.43796	7.41701	7.66463	6.6453	6.7866	6.7046	-4.4392	-0.794368	-1.73432
ILMN_2311537	HMGA1	high mobility group AT-hook 1 (HMGA1), transcript variant 1	MGC12816; MGC4854; HMG-R; MGC4242; HMGIY	NM_145899.1	3159	11.5243	11.2551	11.1719	10.4933	10.6448	10.4356	-3.72055	-0.792564	-1.73215
ILMN_1663390	CDC20	cell division cycle 20 homolog (S. cerevisiae) (CDC20)	CDC20A; bA276H19.3; MGC102824; p55CDC	NM_001255.2	991	9.56758	9.6575	9.5988	8.70148	9.10303	8.69174	-3.40672	-0.775874	-1.71223
ILMN_3238283	LOC100130123	PREDICTED: similar to PRO2870 (LOC100130123)		XM_001726844.1	100130123	7.58946	6.91409	6.91767	5.83542	6.88509	6.40088	-1.64127	-0.766612	-1.70127
ILMN_1796069	CBLN2	cerebellin 2 precursor (CBLN2)		NM_182511.2	147381	6	5.82528	5.91409	5.29278	5.10852	5.06178	-4.30123	-0.75876	-1.69204
ILMN_1660232	PEX5	peroxisomal biogenesis factor 5 (PEX5)	PTS1R; PXR1	NM_000319.3	5830	9.37873	9.45224	9.37721	8.55919	8.70598	8.6837	-5.31629	-0.753107	-1.68542
ILMN_1651656	PSG7	pregnancy specific beta-1-glycoprotein 7 (PSG7)		NM_002783.1	5676	6.9507	7.19967	7.30652	6.57743	6.44294	6.18587	-3.0545	-0.750218	-1.68205
ILMN_1788283	COTL1	coactosin-like 1 (Dictyostelium) (COTL1)	CLP; FLJ43657; MGC19733	NM_021149.2	23406	9.61802	9.74164	9.73115	9.41638	8.80413	8.62169	-2.249	-0.749537	-1.68125
ILMN_1679267	TGM2	transglutaminase 2 (C polypeptide, protein-glutamine-gamma-glutamyltransferase) (TGM2), transcript variant 2	TGC; TG2	NM_198951.1	7052	8.50224	8.52042	8.63154	7.82273	7.86604	7.75689	-5.21778	-0.736179	-1.66576
ILMN_2399893	RPS24	ribosomal protein S24 (RPS24), transcript variant 2	DKFZp686N1586; DBA3	NM_001026.3	6229	10.2087	10.0422	10.1122	9.1298	9.47513	9.58195	-3.09423	-0.72541	-1.65337
ILMN_1657348	LOC650909	PREDICTED: similar to activating signal cointegrator 1 complex subunit 3-like 1 (LOC650909)		XM_939995.2	650909	7.04985	6.67948	6.58946	5.59096	6.36982	6.22497	-1.93592	-0.711017	-1.63696
ILMN_2070072	RPS7	ribosomal protein S7 (RPS7)		NM_001011.3	6201	9.04821	8.87375	8.92985	7.98868	8.35006	8.38284	-3.14122	-0.710079	-1.63589
ILMN_1815500	ITPR3	inositol 1,4,5-triphosphate receptor, type 3 (ITPR3)	FLJ36205; IP3R; IP3R3	NM_002224.2	3710	10.6412	10.6196	10.5574	9.84925	10.1271	9.73183	-3.35616	-0.703339	-1.62827
ILMN_1739450	NFE2L1	nuclear factor (erythroid-derived 2)-like 1 (NFE2L1)	FLJ00380; TCF11; LCR-F1; NRF1	NM_003204.1	4779	9.30993	9.16616	9.12516	8.49025	8.54303	8.46679	-4.66629	-0.700393	-1.62495
ILMN_1755737	TRABD	TraB domain containing (TRABD)	LP6054; PP2447; MGC110928	NM_025204.2	80305	10.1097	10.0622	9.98413	9.38543	9.50084	9.17193	-3.62743	-0.699272	-1.62368
ILMN_1711899	ANXA2	annexin A2 (ANXA2), transcript variant 2	P36; LPC2D; ANX2L4; ANX2; PAP-IV; CAL1H; LIP2; LPC2	NM_001002857.1	302	10.4983	10.4008	10.2688	9.57024	9.86929	9.6498	-3.44446	-0.692828	-1.61645
ILMN_1673639	ABI3BP	ABI gene family, member 3 (NESH) binding protein (ABI3BP)	FLJ41743; FLJ41754; TARSH; NESHBP	NM_015429.2	25890	9.84627	10.033	10.1184	9.42291	9.18438	9.32778	-3.51084	-0.687548	-1.61054
ILMN_2219131	RPS15	ribosomal protein S15 (RPS15)	RIG; MGC111130	NM_001018.3	6209	8.20701	8.16239	8.32418	7.36545	7.74079	7.52591	-3.2931	-0.687145	-1.61009
ILMN_1678170	MME	membrane metallo-endopeptidase (MME), transcript variant 1	MGC126681; NEP; CD10; MGC126707; DKFZp686O16152; CALLA	NM_000902.3	4311	8.06016	8.14057	8.3345	7.36194	7.52669	7.59694	-3.47074	-0.683218	-1.60572
ILMN_1705364	BAT3	HLA-B associated transcript 3 (BAT3), transcript variant 2	BAG-6; G3; D6S52E; BAG6	NM_080702.2	7917	8.28725	8.07253	8.16239	7.29186	7.77017	7.4187	-2.76925	-0.680484	-1.60268
ILMN_1680965	LOC728454	PREDICTED: similar to Beta-defensin 2 precursor (BD-2) (hBD-2) (Defensin, beta 2) (Skin-antimicrobial peptide 1) (SAP1) (LOC728454)		XM_001128061.1	728454	6.47573	6.29646	6.33271	5.82528	5.56377	5.68089	-3.70547	-0.678322	-1.60028
ILMN_1781942	HMMR	hyaluronan-mediated motility receptor (RHAMM) (HMMR), transcript variant 2	RHAMM; MGC119495; IHABP; MGC119494; CD168	NM_012485.1	3161	7.56682	7.58346	7.33628	6.94603	6.69905	6.83794	-3.39329	-0.667844	-1.5887
ILMN_1733256	PSMD8	proteasome (prosome, macropain) 26S subunit, non-ATPase, 8 (PSMD8)	Nin1p; HIP6; S14; HYPF; MGC1660; p31	NM_002812.3	5714	9.47127	9.3122	9.4731	8.58045	9.09987	8.5744	-2.45461	-0.667281	-1.58808
ILMN_2215989	NEFM	neurofilament, medium polypeptide 150kDa (NEFM)	NF-M; NEF3; NFM	NM_005382.1	4741	6.34873	6.49346	6.8009	5.99548	5.80219	5.85549	-2.82315	-0.663305	-1.58371
ILMN_1695658	KIF20A	kinesin family member 20A (KIF20A)	RAB6KIFL; MKLP2; FLJ21151	NM_005733.1	10112	8.25172	8.08958	7.94953	7.30834	7.56682	7.42626	-3.24083	-0.663139	-1.58352
ILMN_1693397	PSG4	pregnancy specific beta-1-glycoprotein 4 (PSG4), transcript variant 1	PSG9	NM_002780.3	5672	6.45943	6.51254	6.50938	5.97269	5.73335	5.79701	-4.03779	-0.659431	-1.57946
ILMN_1801939	CCNB2	cyclin B2 (CCNB2)	HsT17299	NM_004701.2	9133	8.39103	8.44543	8.47614	7.78921	7.81634	7.732	-5.27178	-0.658349	-1.57828
ILMN_3273491	LOC100130332	PREDICTED: similar to PRO2474 (LOC100130332)		XM_001723315.1	100130332	8.85144	8.42585	8.61508	7.43296	8.31424	8.17393	-1.6868	-0.657077	-1.57688
ILMN_2051373	NEK2	NIMA (never in mitosis gene a)-related kinase 2 (NEK2)	NLK1; NEK2A; HsPK 21; HsPK21	NM_002497.2	4751	7.84109	7.8505	7.89239	7.11894	7.21335	7.28263	-4.69846	-0.656356	-1.5761
ILMN_1815306	AP2A1	adaptor-related protein complex 2, alpha 1 subunit (AP2A1), transcript variant 2	CLAPA1; AP2-ALPHA; ADTAA	NM_130787.2	160	7.65607	7.56071	7.41616	6.88142	6.853	6.93664	-3.99631	-0.653964	-1.57349
ILMN_1776181	BIRC3	baculoviral IAP repeat-containing 3 (BIRC3), transcript variant 1	RNF49; MALT2; MIHC; HAIP1; API2; HIAP1; AIP1; CIAP2	NM_001165.3	330	8.78038	8.86573	8.75789	8.06824	8.22448	8.14975	-4.49326	-0.653842	-1.57335
ILMN_3258346	LOC100130009	PREDICTED: similar to high mobility group protein (LOC100130009)		XM_001720338.1	100130009	7.12825	6.87652	6.75756	6.17393	6.36282	6.26491	-3.08517	-0.653556	-1.57304
ILMN_3243644	LOC100132564	PREDICTED: hypothetical protein LOC100132564 (LOC100132564)		XM_001713808.1	100132564	9.59842	9.5947	9.61637	9.00478	8.92095	8.93221	-5.56876	-0.650514	-1.56973
ILMN_1803277	MVP	major vault protein (MVP), transcript variant 2	LRP; VAULT1	NM_005115.3	9961	10.4435	10.1214	10.1462	9.42059	9.80106	9.54342	-2.67747	-0.64866	-1.56771
ILMN_3239771	DLGAP5	discs, large (Drosophila) homolog-associated protein 5 (DLGAP5)	DLG1; HURP; KIAA0008	NM_014750.3	9787	7.57894	7.65535	7.66818	7.00562	7.00787	6.94953	-5.23584	-0.64648	-1.56534
ILMN_1684306	S100A4	S100 calcium binding protein A4 (S100A4), transcript variant 2	FSP1; MTS1; 18A2; PEL98; P9KA; CAPL; 42A	NM_019554.2	6275	7.92422	7.60585	7.75422	7.03452	7.19476	7.12825	-3.33188	-0.642252	-1.56076
ILMN_2366330	FERMT3	fermitin family homolog 3 (Drosophila) (FERMT3), transcript variant URP2SF	MIG-2; KIND3; MIG2B; URP2; UNC112C; MGC10966	NM_031471.4	83706	8.7269	8.73978	8.79604	8.224	8.14771	7.98242	-3.8769	-0.636194	-1.55422
ILMN_3257475	LOC100129866	PREDICTED: misc_RNA (LOC100129866), miscRNA.		XR_037532.1	100129866	8.20555	7.94017	8.01011	7.22978	7.55305	7.4814	-2.921	-0.630532	-1.54814
ILMN_2278729	EIF3B	eukaryotic translation initiation factor 3, subunit B (EIF3B), transcript variant 2	EIF3-P116; MGC131875; EIF3-P110; EIF3S9; PRT1; MGC104664; EIF3-ETA; eIF3b	NM_001037283.1	8662	8.2484	7.96232	8.11478	7.42291	7.64962	7.36282	-3.00112	-0.630054	-1.54762
ILMN_1796639	UBQLN3	ubiquilin 3 (UBQLN3)	TUP-1	NM_017481.2	50613	7.01123	6.93664	7	6.38543	6.45779	6.2211	-3.84049	-0.627846	-1.54526
ILMN_3210946	LOC645969	PREDICTED: misc_RNA (LOC645969), miscRNA.		XR_037475.1	645969	9.0207	8.87682	9.09038	8.24365	8.44419	8.41996	-3.50398	-0.626702	-1.54403
ILMN_1749829	DLGAP5	discs, large (Drosophila) homolog-associated protein 5 (DLGAP5)	DLG1; HURP; KIAA0008	NM_014750.3	9787	7.74752	7.91707	7.71768	7.30104	7.08534	7.12516	-3.45435	-0.623579	-1.54069
ILMN_1751571	RAD23A	RAD23 homolog A (S. cerevisiae) (RAD23A)	HHR23A; MGC111083	NM_005053.2	5886	9.78545	9.7342	9.57289	9.03149	9.16164	9.0433	-3.72598	-0.618704	-1.5355
ILMN_2171384	CXCL5	chemokine (C-X-C motif) ligand 5 (CXCL5)	ENA-78; SCYB5	NM_002994.3	6374	10.0912	10.3756	10.0363	9.71407	9.47046	9.4731	-2.76724	-0.615146	-1.53171
ILMN_1788095	SPRYD3	SPRY domain containing 3 (SPRYD3)	FLJ14800	NM_032840.1	84926	8.80639	8.71665	8.69801	7.80671	8.43003	8.14109	-2.25151	-0.614405	-1.53093
ILMN_1728009	TMEM171	transmembrane protein 171 (TMEM171)	PRP2	NM_173490.5	134285	8.07521	7.73877	7.96694	7.21917	7.46189	7.25739	-2.86661	-0.614157	-1.53066
ILMN_2250445	SMTN	smoothelin (SMTN), transcript variant 2	FLJ38597; FLJ35365	NM_134269.1	6525	7.05311	6.88996	6.87897	6.15785	6.57592	6.24793	-2.68281	-0.613448	-1.52991
ILMN_1750722	RPS7	ribosomal protein S7 (RPS7)		NM_001011.3	6201	9.2148	9.09461	9.2854	8.3996	8.6575	8.70009	-3.08026	-0.612541	-1.52895
ILMN_1782057	ATP8B2	ATPase, class I, type 8B, member 2 (ATP8B2), transcript variant 1	ATPID; DKFZp434M0219; KIAA1137	NM_020452.2	57198	8.37721	8.54226	8.43003	7.6893	8.00282	7.82018	-3.17593	-0.612403	-1.5288
ILMN_1659952	MTMR2	myotubularin related protein 2 (MTMR2), transcript variant 3	KIAA1073; CMT4B1; CMT4B	NM_201281.1	8898	7.55995	7.57592	7.50621	6.83289	7.15279	6.82528	-3.05686	-0.610373	-1.52665
ILMN_1794863	CAMK2N1	calcium/calmodulin-dependent protein kinase II inhibitor 1 (CAMK2N1)	ICAP-1alpha; MGC22256; PRO1489; RP11-401M16.1	NM_018584.5	55450	9.77742	9.60028	9.61379	9.1467	9.02956	8.98613	-3.71452	-0.609703	-1.52594
ILMN_1765701	LOC399942	PREDICTED: similar to Tubulin alpha-2 chain (Alpha-tubulin 2), transcript variant 5 (LOC399942)		XM_934471.1	399942	10.6278	10.4084	10.422	9.64404	10.1136	9.87728	-2.50393	-0.607757	-1.52389
ILMN_1780667	WDR51A	WD repeat domain 51A (WDR51A)	MGC131902; DKFZP434C245	NM_015426.2	25886	7.63735	7.53838	7.71356	6.97957	7.1819	6.90569	-3.25503	-0.607379	-1.52349
ILMN_1682599	GPRC5A	G protein-coupled receptor, family C, group 5, member A (GPRC5A)	RAIG1; RAI3; GPCR5A	NM_003979.3	9052	9.12851	8.79474	8.67737	7.99322	8.56872	8.22545	-1.9839	-0.604411	-1.52036
ILMN_2199389	VIPR1	vasoactive intestinal peptide receptor 1 (VIPR1)	PACAP-R-2; FLJ41949; VPAC1; VIRG; HVR1; VPCAP1R; II; VAPC1; VIPR; RDC1	NM_004624.2	7433	8.38716	8.31334	8.26162	7.76553	7.74819	7.6388	-4.20155	-0.603197	-1.51908
ILMN_1794085	SAPS1	SAPS domain family, member 1 (SAPS1)	SAP190; MGC138185; MGC142003; PP6R1; KIAA1115	NM_014931.3	22870	6.8936	6.66534	6.79442	6.0917	6.2891	6.16993	-3.39032	-0.600878	-1.51664
ILMN_2366334	FERMT3	fermitin family homolog 3 (Drosophila) (FERMT3), transcript variant URP2SF	MIG-2; KIND3; MIG2B; URP2; UNC112C; MGC10966	NM_031471.4	83706	6.91289	6.71149	6.59544	5.853	6.27798	6.28725	-2.30672	-0.600532	-1.51628
ILMN_2042771	PTTG1	pituitary tumor-transforming 1 (PTTG1)	SECURIN; PTTG; MGC138276; EAP1; TUTR1; MGC126883; HPTTG	NM_004219.2	9232	10.1724	10.1688	10.0934	9.38931	9.66871	9.58402	-3.38857	-0.597534	-1.51313
ILMN_2409220	HMMR	hyaluronan-mediated motility receptor (RHAMM) (HMMR), transcript variant 1	RHAMM; MGC119495; IHABP; MGC119494; CD168	NM_012484.1	3161	7.46025	7.57818	7.56605	7.09487	6.91049	6.81378	-3.30135	-0.595115	-1.51059
ILMN_1715901	FBXL17	F-box and leucine-rich repeat protein 17 (FBXL17)	MGC161424; MGC161422; Fbx13; Fbl17; DKFZp434C1715; FBXO13	NM_022824.1	64839	5.86047	5.96347	5.99774	5.55459	5.41278	5.07039	-2.48565	-0.594642	-1.5101
ILMN_1678754	PFDN2	prefoldin subunit 2 (PFDN2)	PFD2	NM_012394.3	5202	6.56682	6.62205	6.24603	6.05528	5.76022	5.848	-2.50226	-0.590465	-1.50573
ILMN_2367275	BCL7B	B-cell CLL/lymphoma 7B (BCL7B), transcript variant 2		NM_138707.1	9275	8.56491	8.60288	8.62425	7.95942	8.14873	7.91468	-3.60677	-0.589735	-1.50497
ILMN_2393296	GK	glycerol kinase (GK), transcript variant 1	GKD; GK1	NM_203391.1	2710	7.22593	7.12928	7.0542	6.44128	6.73606	6.46434	-2.9969	-0.58924	-1.50445
ILMN_1713636	S100A6	S100 calcium binding protein A6 (S100A6)	PRA; CABP; 2A9; 5B10; CACY	NM_014624.3	6277	12.6222	12.4605	12.3905	11.6309	12.1135	11.9697	-2.36073	-0.58636	-1.50145
ILMN_2198878	INPP4B	inositol polyphosphate-4-phosphatase, type II, 105kDa (INPP4B)	MGC132014	NM_003866.1	8821	7.28077	7.25739	7.49105	6.8392	6.67948	6.75622	-3.30086	-0.584768	-1.4998
ILMN_1661439	FLOT1	flotillin 1 (FLOT1)		NM_005803.2	10211	8.42333	8.23793	7.98868	7.65893	7.75622	7.48059	-2.4438	-0.584734	-1.49976
ILMN_2225718	CENPE	centromere protein E, 312kDa (CENPE)	KIF10	NM_001813.2	1062	6.80607	6.84046	6.88631	6.20945	6.27798	6.29462	-4.68266	-0.583592	-1.49858
ILMN_1717056	TXNRD1	thioredoxin reductase 1 (TXNRD1), transcript variant 5	MGC9145; TR; TXNR; GRIM-12; TRXR1; TR1	NM_001093771.1	7296	11.9198	11.7993	11.8124	11.0921	11.4079	11.2901	-3.06445	-0.58049	-1.49536
ILMN_2139816	GPSM2	G-protein signalling modulator 2 (AGS3-like, C. elegans) (GPSM2)	Pins; LGN	NM_013296.3	29899	6.62205	6.67243	6.54071	5.90207	6.16189	6.03122	-3.33419	-0.580002	-1.49485
ILMN_3239574	SNORD3A	small nucleolar RNA, C/D box 3A (SNORD3A), small nucleolar RNA.	U3	NR_006880.1	780851	7.46434	7.26772	7.45533	6.65535	6.76951	7.03342	-2.6353	-0.57637	-1.49109
ILMN_1776213	RGMB	RGM domain family, member B (RGMB), transcript variant 1	FLJ90406; MGC86970; DRAGON	NM_001012761.1	285704	8.41996	8.48462	8.59059	8.01737	7.91707	7.83479	-3.54615	-0.575314	-1.49
ILMN_2370976	FER1L3	fer-1-like 3, myoferlin (C. elegans) (FER1L3), transcript variant 1	FLJ36571; FLJ90777; MYOF	NM_013451.2	26509	8.83794	8.62315	8.22786	7.6858	8.36501	7.91409	-1.60726	-0.574685	-1.48935
ILMN_1779356	TP53	tumor protein p53 (TP53)	p53; TRP53; LFS1	NM_000546.3	7157	8.48301	8.32823	8.20359	7.62717	7.87467	7.79961	-2.87297	-0.571127	-1.48568
ILMN_1701204	VEGFC	vascular endothelial growth factor C (VEGFC)	VRP; Flt4-L	NM_005429.2	7424	9.42606	9.30652	9.35403	8.72962	8.80768	8.83826	-4.15768	-0.570348	-1.48488
ILMN_2363621	RBBP8	retinoblastoma binding protein 8 (RBBP8), transcript variant 2	CTIP; RIM	NM_203291.1	5932	9.8088	9.84847	9.72485	9.15507	9.32935	9.18809	-3.69103	-0.56987	-1.48439
ILMN_1800573	RPS21	ribosomal protein S21 (RPS21)		NM_001024.3	6227	10.7824	10.6676	10.7219	9.83684	10.2595	10.3797	-2.19419	-0.565295	-1.47969
ILMN_3241818	LOC100133398	PREDICTED: misc_RNA (LOC100133398), partial miscRNA.		XR_038246.1	100133398	7.29646	6.90689	7.15178	6.59842	6.53294	6.53761	-2.73718	-0.562051	-1.47637
ILMN_1786125	CCNA2	cyclin A2 (CCNA2)	CCNA; CCN1	NM_001237.2	890	8.46964	8.3345	8.33271	7.61102	8.06609	7.77873	-2.43513	-0.560333	-1.47461
ILMN_1714730	UBE2C	ubiquitin-conjugating enzyme E2C (UBE2C), transcript variant 6	UBCH10; dJ447F3.2	NM_181803.1	11065	9.28494	9.16967	9.23577	8.61066	8.86728	8.54264	-2.86847	-0.556603	-1.4708
ILMN_2349459	BIRC5	baculoviral IAP repeat-containing 5 (BIRC5), transcript variant 1	EPR-1; API4	NM_001168.2	332	8.04439	8.13802	8.11946	7.3336	7.80025	7.50224	-2.42363	-0.55526	-1.46943
ILMN_2322768	CSF3	colony stimulating factor 3 (granulocyte) (CSF3), transcript variant 1	MGC45931; G-CSF; GCSF	NM_000759.2	1440	8.45738	8.16742	8.15431	7.76089	7.76553	7.59768	-2.71791	-0.55167	-1.46578
ILMN_1671843	PSRC1	proline/serine-rich coiled-coil 1 (PSRC1), transcript variant 4	RP11-297O4.2; MGC1780; FP3214; DDA3	NM_001032290.1	84722	7.59619	7.57213	7.54921	6.86171	7.1809	7.02126	-3.01469	-0.55122	-1.46532
ILMN_2202948	BUB1	BUB1 budding uninhibited by benzimidazoles 1 homolog (yeast) (BUB1)	hBUB1; BUB1L; BUB1A	NM_004336.2	699	7.32463	7.48059	7.4545	6.8125	6.92006	6.87529	-3.74204	-0.550627	-1.46472
ILMN_1679358	ZDHHC5	zinc finger, DHHC-type containing 5 (ZDHHC5)	DKFZP586K0524; ZNF375; KIAA1748	NM_015457.2	25921	8.47573	8.20016	8.47411	7.70736	7.88631	7.91049	-2.72298	-0.548617	-1.46268
ILMN_1781173	HDAC9	histone deacetylase 9 (HDAC9), transcript variant 3	DKFZp779K1053; HDAC; HDAC9FL; MITR; HD7; HDRP; HDAC9B; KIAA0744; HDAC7B; HDAC7	NM_014707.1	9734	5.97957	6.34696	6.10224	5.6865	5.60288	5.50779	-2.59722	-0.543861	-1.45787
ILMN_1759792	CLIP4	CAP-GLY domain containing linker protein family, member 4 (CLIP4)	FLJ32705; RSNL2; FLJ21069	NM_024692.3	79745	7.26303	7.2317	7.03892	6.52356	6.72792	6.66107	-2.96812	-0.540369	-1.45434
ILMN_3245869	LOC440957	similar to CG32736-PA (LOC440957)		NM_001124767.1	440957	8.0542	8.04221	8.17393	7.28263	7.71287	7.65964	-2.32565	-0.538399	-1.45236
ILMN_2355462	CYFIP1	cytoplasmic FMR1 interacting protein 1 (CYFIP1), transcript variant 2	FLJ45151; SHYC; P140SRA-1	NM_001033028.1	23191	9.38478	9.1467	9.05961	8.49386	8.84549	8.63952	-2.33052	-0.537409	-1.45136
ILMN_1737394	LMNA	lamin A/C (LMNA), transcript variant 2	HGPS; EMD2; FPLD; LDP1; LMNC; FPL; LFP; CDCD1; LGMD1B; IDC; CMT2B1; PRO1; LMN1; CMD1A; CDDC	NM_005572.3	4000	10.1943	9.82114	9.90343	9.53275	9.55132	9.22593	-2.19392	-0.536277	-1.45023
ILMN_3290019	LOC646753	PREDICTED: similar to ribosomal protein S26 (LOC646753)		XM_001722130.1	646753	9.06878	8.73403	8.89875	8.02403	8.55612	8.51294	-1.87601	-0.536157	-1.4501
ILMN_1702197	C9orf140	chromosome 9 open reading frame 140 (C9orf140)		NM_178448.2	89958	5.60288	5.91886	5.80735	5.30378	5.37851	5.04876	-2.35896	-0.532684	-1.44662
ILMN_3237632	NCLN	nicalin homolog (zebrafish) (NCLN)		NM_020170.3	56926	9.36326	9.1393	9.34207	8.57969	8.99803	8.66924	-2.26093	-0.532557	-1.44649
ILMN_2364357	RPS6KB2	ribosomal protein S6 kinase, 70kDa, polypeptide 2 (RPS6KB2)	p70S6Kb; P70-beta-2; S6K-beta2; p70(S6K)-beta; P70-beta-1; KLS; S6K2; SRK; STK14B; P70-beta	NM_003952.2	6199	10.5279	10.529	10.6043	9.87575	10.2	9.98982	-2.82918	-0.531858	-1.44579
ILMN_2189869	FCF1	FCF1 small subunit (SSU) processome component homolog (S. cerevisiae) (FCF1)	C14orf111; MGC99629; Bka; CGI-35	NM_015962.4	51077	6.67243	6.97842	6.61029	5.99322	6.37156	6.30195	-2.10582	-0.531468	-1.4454
ILMN_3242315	SNORD3D	small nucleolar RNA, C/D box 3D (SNORD3D), small nucleolar RNA.	U3-4	NR_006882.1	780854	7.55612	7.60363	7.75288	6.81506	7.07253	7.43129	-1.91116	-0.531248	-1.44518
ILMN_2112811	RPL36A	ribosomal protein L36a (RPL36A)	RPL44; MGC72020; MIG6; L44L	NM_021029.4	6173	7.28633	7.1918	7.29921	6.46923	6.8189	6.90087	-2.33937	-0.529444	-1.44337
ILMN_3283032	LOC100132535	PREDICTED: misc_RNA (LOC100132535), miscRNA.		XR_038464.1	100132535	7.79961	7.55152	7.65893	7.28817	7.10852	7.02569	-2.709	-0.529218	-1.44315
ILMN_2367707	PKN1	protein kinase N1 (PKN1), transcript variant 1	PRKCL1; PAK1; PKN; DBK; PRK1; MGC46204	NM_213560.1	5585	8.09961	7.89239	7.76288	7.27426	7.52904	7.36982	-2.47832	-0.527255	-1.44118
ILMN_1748591	ODC1	ornithine decarboxylase 1 (ODC1)		NM_002539.1	4953	10.9848	10.8144	10.9262	10.2441	10.605	10.2966	-2.47356	-0.526568	-1.4405
ILMN_1784871	FASN	fatty acid synthase (FASN)	MGC14367; MGC15706; FAS; OA-519	NM_004104.4	2194	10.0467	10.1049	10.0681	9.56129	9.7046	9.37526	-2.82065	-0.526181	-1.44011
ILMN_3300744	LOC728666	PREDICTED: misc_RNA (LOC728666), miscRNA.		XR_015842.2	728666	10.0358	10.0301	9.95274	9.25574	9.60844	9.57667	-2.5593	-0.525923	-1.43985
ILMN_1740650	KCNQ4	PREDICTED: potassium voltage-gated channel, KQT-like subfamily, member 4 (KCNQ4)		XM_941223.1	9132	5.44956	5.57289	5.38198	4.79181	4.83794	5.19771	-2.28888	-0.525654	-1.43959
ILMN_1672650	PKM2	pyruvate kinase, muscle (PKM2), transcript variant 1	OIP3; TCB; PKM; THBP1; MGC3932; PK3; CTHBP	NM_002654.3	5315	9.41109	8.90989	8.9263	8.58946	8.63081	8.45327	-1.99736	-0.524576	-1.43851
ILMN_1773119	CCNF	cyclin F (CCNF)	FBX1; FBXO1	NM_001761.1	899	7.84423	7.66391	7.59619	7.0045	7.2891	7.24031	-2.55851	-0.523475	-1.43741
ILMN_1757343	PABPC4	poly(A) binding protein, cytoplasmic 4 (inducible form) (PABPC4)	APP-1; APP1; PABP4; iPABP	NM_003819.2	8761	10.6121	10.432	10.5625	10.1734	10.0135	9.85081	-2.65183	-0.522993	-1.43693
ILMN_1812249	C15orf54	chromosome 15 open reading frame 54 (C15orf54)	FLJ39531	NM_207445.1	400360	6.55612	6.57894	6.51728	6.05094	6.07039	5.96347	-4.10807	-0.522512	-1.43645
ILMN_1775327	PKM2	pyruvate kinase, muscle (PKM2), transcript variant 2	OIP3; TCB; PKM; THBP1; MGC3932; PK3; CTHBP	NM_182470.1	5315	10.1058	9.5588	9.4363	9.20628	9.24627	9.08905	-1.72764	-0.519759	-1.43372
ILMN_1805410	C15orf48	chromosome 15 open reading frame 48 (C15orf48), transcript variant 2	FLJ22645; MGC32925; NMES1; FOAP-11	NM_032413.2	84419	8.60511	8.49466	8.46801	8.10696	7.91349	7.99605	-3.23734	-0.517095	-1.43107
ILMN_2194828	C16orf53	chromosome 16 open reading frame 53 (C16orf53)	PA1; MGC4606	NM_024516.2	79447	8.79831	8.63009	8.67525	8.19525	8.32823	8.02901	-2.72421	-0.517053	-1.43103
ILMN_1715636	EIF3B	eukaryotic translation initiation factor 3, subunit B (EIF3B), transcript variant 1	EIF3-P116; MGC131875; EIF3-P110; EIF3S9; PRT1; MGC104664; EIF3-ETA; eIF3b	NM_003751.3	8662	10.0607	9.94837	10.069	9.28933	9.71596	9.52199	-2.36017	-0.516943	-1.43092
ILMN_1754865	LOC400455	PREDICTED: hypothetical LOC400455 (LOC400455)		XR_018793.1	400455	9.75255	9.6844	9.63735	9.03232	9.43734	9.05582	-2.29287	-0.516271	-1.43025
ILMN_1706571	SLC35D2	solute carrier family 35, member D2 (SLC35D2)	HFRC1; SQV7L; MGC117215; UGTrel8; MGC142139; hfrc	NM_007001.1	11046	7.33181	7.1918	6.95187	6.51885	6.72656	6.6837	-2.37057	-0.515458	-1.42945
ILMN_1837935	TNPO1	transportin 1 (TNPO1), transcript variant 2	TRN; IPO2; KPNB2; MIP; MIP1	NM_153188.2	3842	8.93723	8.95681	8.74618	8.13853	8.47897	8.47654	-2.32956	-0.515391	-1.42938
ILMN_3246805	LOC100134364	PREDICTED: hypothetical protein LOC100134364 (LOC100134364)		XM_001713810.1	100134364	11.6031	11.3405	11.4401	10.629	11.1604	11.0524	-1.91064	-0.513982	-1.42799
ILMN_1786259	LRRC59	leucine rich repeat containing 59 (LRRC59)	PRO1855; FLJ21675	NM_018509.2	55379	7.6893	7.65964	7.35579	6.88874	7.07361	7.20261	-2.23253	-0.513256	-1.42727
ILMN_1755711	C17orf68	PREDICTED: chromosome 17 open reading frame 68 (C17orf68)		XM_938283.2	80169	6.36457	6.26866	6.34341	5.76288	5.78921	5.88753	-3.72586	-0.512342	-1.42636
ILMN_1798380	UBQLN1	ubiquilin 1 (UBQLN1), transcript variant 2	DA41; XDRP1; DSK2; FLJ90054; PLIC-1	NM_053067.1	29979	7.5947	7.39403	7.38024	6.70874	7.1334	6.99095	-2.20253	-0.511961	-1.42599
ILMN_1679929	KLF13	Kruppel-like factor 13 (KLF13)	NSLP1; FKLF2; RFLAT-1; BTEB3; RFLAT1	NM_015995.2	51621	7.90629	7.71973	7.72724	7.21723	7.35667	7.24982	-3.11241	-0.509844	-1.4239
ILMN_3226807	NHP2	NHP2 ribonucleoprotein homolog (yeast) (NHP2), transcript variant 2	NHP2P; NHP2	NM_001034833.1	55651	8.63263	8.58195	8.35799	7.91109	7.96463	8.16742	-2.49104	-0.509812	-1.42387
ILMN_3257430	HNRNPUL1	heterogeneous nuclear ribonucleoprotein U-like 1 (HNRNPUL1), transcript variant 4		NM_144732.2	11100	6.57592	6.30378	6.56834	5.8679	6.16591	5.88509	-2.30243	-0.509713	-1.42377
ILMN_1678757	BCYRN1	brain cytoplasmic RNA 1 (non-protein coding) (BCYRN1), non-coding RNA.	BC200a; BC200	NR_001568.1	618	11.9347	11.3394	11.3279	10.8377	10.9713	11.267	-1.55632	-0.508696	-1.42276
ILMN_1712452	KIF20B	kinesin family member 20B (KIF20B)	DKFZp434P0810; DKFZp434B0435; MPP-1; KRMP1; MPP1	NM_016195.2	9585	7.65033	7.6575	7.42543	7.10852	7.06932	7.03012	-3.0051	-0.508434	-1.42251
ILMN_1666305	CDKN3	cyclin-dependent kinase inhibitor 3 (CDK2-associated dual specificity phosphatase) (CDKN3)	CDI1; KAP; MGC70625; FLJ25787; CIP2; KAP1	NM_005192.2	1033	7.64818	7.71631	7.69	7.16993	7.15076	7.21237	-4.34824	-0.507139	-1.42123
ILMN_1766171	SNF8	SNF8, ESCRT-II complex subunit, homolog (S. cerevisiae) (SNF8)	VPS22; EAP30; Dot3	NM_007241.2	11267	8.80413	9.14109	9.08401	8.49586	8.48341	8.52904	-2.60371	-0.506973	-1.42107
ILMN_1714600	NAV3	neuron navigator 3 (NAV3)	unc53H3; STEERIN3; POMFIL1; KIAA0938	NM_014903.4	89795	7.25267	7.14568	7.17592	6.74012	6.68229	6.63372	-3.77714	-0.506045	-1.42015
ILMN_1801257	CENPA	centromere protein A (CENPA), transcript variant 2	CENP-A	NM_001042426.1	1058	6.89966	7.07361	7.02459	6.2891	6.75889	6.43296	-2.1244	-0.505635	-1.41975
ILMN_2226415	LOC440145	similar to RIKEN cDNA 2410129H14 (LOC440145)	MGC150539; FLJ21869	NM_001071775.1	440145	7.74819	7.71973	7.74886	7.25267	7.20653	7.24222	-4.73595	-0.505125	-1.41925
ILMN_1744693	FGF2	fibroblast growth factor 2 (basic) (FGF2)	HBGF-2; BFGF; FGFB	NM_002006.4	2247	7.99944	8.04712	8.11582	7.32912	7.70598	7.6125	-2.42829	-0.504928	-1.41905
ILMN_1741985	BBS10	Bardet-Biedl syndrome 10 (BBS10)	C12orf58; FLJ23560	NM_024685.3	79738	6.35579	6.48382	6.22689	5.68089	5.89724	5.97728	-2.45471	-0.503698	-1.41784
ILMN_2301083	UBE2C	ubiquitin-conjugating enzyme E2C (UBE2C), transcript variant 3	UBCH10; dJ447F3.2	NM_181800.1	11065	9.20335	9.2446	9.15203	8.62132	8.76055	8.71218	-3.62386	-0.501975	-1.41615
ILMN_3269775	C14orf109	chromosome 14 open reading frame 109 (C14orf109), transcript variant 2	DKFZP564F1123	NM_015676.1	26175	7.75489	7.4545	7.6907	7.04985	7.13545	7.20945	-2.61318	-0.501778	-1.41596
ILMN_2175474	MTRF1L	mitochondrial translational release factor 1-like (MTRF1L)	MGC102748	NM_019041.3	54516	9.6844	9.65982	9.60381	9.09223	9.25219	9.10879	-3.41718	-0.498274	-1.41252
ILMN_1719759	TNC	tenascin C (TNC)	HXB; TN; MGC167029	NM_002160.2	3371	7.99548	7.66818	7.52591	7.09381	7.31379	7.28725	-2.03319	-0.498239	-1.41249
ILMN_2281810	PSG4	pregnancy specific beta-1-glycoprotein 4 (PSG4), transcript variant 1	PSG9	NM_002780.3	5672	5.97957	6.15583	5.83542	5.44626	5.59694	5.43962	-2.53522	-0.496001	-1.4103
ILMN_1811102	LRSAM1	leucine rich repeat and sterile alpha motif containing 1 (LRSAM1), transcript variant 1	FLJ31641; RIFLE; TAL	NM_138361.3	90678	7.15785	7.17592	7.10538	6.64097	6.7211	6.59395	-3.73315	-0.494381	-1.40872
ILMN_2387505	AP1B1	adaptor-related protein complex 1, beta 1 subunit (AP1B1), transcript variant 2	CLAPB2; ADTB1; BAM22; AP105A	NM_145730.1	162	5.89966	5.78398	5.88264	5.42626	5.2854	5.37156	-3.42565	-0.494352	-1.40869
ILMN_1764794	PSMB2	proteasome (prosome, macropain) subunit, beta type, 2 (PSMB2)	MGC126885; HC7-I; MGC104215	NM_002794.3	5690	10.4689	10.2542	10.2804	9.62534	9.89648	9.99915	-2.24512	-0.494191	-1.40853
ILMN_1795719	RPA1	replication protein A1, 70kDa (RPA1)	RPA70; REPA1; RF-A; HSSB; RP-A	NM_002945.2	6117	8.36676	8.24745	8.16591	7.5345	8.05365	7.71149	-1.95163	-0.493492	-1.40785
ILMN_1776076	POFUT1	protein O-fucosyltransferase 1 (POFUT1), transcript variant 1	O-Fuc-T; O-FUT; FUT12; O-FucT-1; MGC2482; KIAA0180	NM_015352.1	23509	8.67842	8.56758	8.56262	8.07575	8.1179	8.13648	-3.74601	-0.492832	-1.4072
ILMN_1716279	CENPE	centromere protein E, 312kDa (CENPE)	KIF10	NM_001813.2	1062	7.49185	7.47978	7.36457	6.97384	7.09698	6.7879	-2.61581	-0.492495	-1.40688
ILMN_1815859	ERCC2	excision repair cross-complementing rodent repair deficiency, complementation group 2 (xeroderma pigmentosum D) (ERCC2)	COFS2; EM9; TTD; MGC126218; MGC126219; XPD; MGC102762	NM_000400.2	2068	8.18289	7.94895	8.04221	7.53216	7.74012	7.42543	-2.4073	-0.492115	-1.4065
ILMN_2317463	INTS1	integrator complex subunit 1 (INTS1)	KIAA1440; DKFZp586J0619; INT1	NM_001080453.1	26173	8.58871	8.53099	8.66178	7.98925	8.32598	7.99774	-2.36654	-0.489503	-1.40396
ILMN_3236675	LOC100133823	PREDICTED: misc_RNA (LOC100133823), miscRNA.		XR_037771.1	100133823	7.60659	7.25077	7.39489	6.61912	7.11478	7.05311	-1.76453	-0.488413	-1.4029
ILMN_1709294	CDCA8	cell division cycle associated 8 (CDCA8)	FLJ12042; FLJ10468; BOR	NM_018101.2	55143	7.1918	7.06717	7.00338	6.45779	6.71836	6.62205	-2.65574	-0.488046	-1.40254
ILMN_2083946	TGFA	transforming growth factor, alpha (TGFA)	TFGA	NM_003236.1	7039	7.15279	7.2182	7.39746	6.77479	6.85798	6.67243	-2.70348	-0.487753	-1.40226
ILMN_1669788	NUDT14	nudix (nucleoside diphosphate linked moiety X)-type motif 14 (NUDT14)	UGPP	NM_177533.2	256281	8.50104	8.49105	8.31967	7.97097	8.00282	7.8759	-3.04912	-0.487359	-1.40188
ILMN_1785618	SMTN	smoothelin (SMTN), transcript variant 3	FLJ38597; FLJ35365	NM_006932.3	6525	8.84549	8.62863	8.68264	8.02625	8.39532	8.27333	-2.25249	-0.487288	-1.40181
ILMN_3276971	LOC642469	PREDICTED: misc_RNA (LOC642469), miscRNA.		XR_042342.1	642469	7.02126	6.49665	7.01123	6.21917	6.6453	6.2075	-1.54206	-0.485723	-1.40029
ILMN_1677305	PVR	poliovirus receptor (PVR)	Necl-5; HVED; NECL5; TAGE4; PVS; CD155	NM_006505.2	5817	8.4733	8.34607	8.32912	7.79181	7.92244	7.98014	-2.99877	-0.484702	-1.3993
ILMN_3249578	LOC100132394	PREDICTED: hypothetical protein LOC100132394 (LOC100132394)		XM_001713809.1	100132394	12.1215	11.7456	12.0146	11.1901	11.6081	11.6309	-1.78371	-0.484188	-1.3988
ILMN_1789839	GTF3C1	general transcription factor IIIC, polypeptide 1, alpha 220kDa (GTF3C1)	TFIIIC220; TFIIIC; DKFZp686A111; TFIIICalpha	NM_001520.2	2975	7.35403	7.16692	7.14975	6.732	6.76818	6.71836	-3.08713	-0.48405	-1.39866
ILMN_1727992	FEZ1	fasciculation and elongation protein zeta 1 (zygin I) (FEZ1), transcript variant 2		NM_022549.2	9638	9.62589	9.80332	9.81906	9.33606	9.29002	9.17343	-2.86926	-0.482923	-1.39757
ILMN_1785756	LOC731314	PREDICTED: similar to H2A histone family, member X (LOC731314)		XM_001129173.1	731314	8.47614	8.28216	8.37895	7.91049	7.93015	7.84987	-3.20018	-0.482244	-1.39691
ILMN_1728083	EIF4EBP2	eukaryotic translation initiation factor 4E binding protein 2 (EIF4EBP2)	4EBP2	NM_004096.3	1979	7.31379	7.22786	6.97039	6.55459	6.6907	6.82018	-2.20934	-0.482192	-1.39686
ILMN_1771841	FOSL1	FOS-like antigen 1 (FOSL1)	fra-1; FRA1	NM_005438.2	8061	7.95884	7.73335	7.70667	7.42206	7.24127	7.29094	-2.58648	-0.481531	-1.39622
ILMN_1774074	RXRB	retinoid X receptor, beta (RXRB)	H-2RIIBP; NR2B2; MGC1831; RCoR-1; DAUDI6	NM_021976.3	6257	8.63154	8.54381	8.45368	7.79831	8.29692	8.08958	-1.97975	-0.481406	-1.3961
ILMN_1666894	CSPG4	chondroitin sulfate proteoglycan 4 (CSPG4)	MSK16; MCSP; NG2; MCSPG; MEL-CSPG; HMW-MAA	NM_001897.4	1464	6.11894	6.15178	6.14364	5.58195	5.6837	5.70598	-3.72402	-0.48091	-1.39562
ILMN_1697069	CSF3	colony stimulating factor 3 (granulocyte) (CSF3), transcript variant 1	MGC45931; G-CSF; GCSF	NM_000759.2	1440	8.89451	8.52591	8.60585	8.26021	8.27053	8.05365	-2.16423	-0.480627	-1.39535
ILMN_1653871	NAMPT	nicotinamide phosphoribosyltransferase (NAMPT)	DKFZP666B131; PBEF; 1110035O14Rik; NAMPT; MGC117256	NM_005746.2	10135	8.92837	9.01987	8.93221	8.39746	8.47168	8.57099	-3.23989	-0.480108	-1.39485
ILMN_3243945	C13orf37	chromosome 13 open reading frame 37 (C13orf37)	MGC150539; FLJ21869	NM_001071775.2	440145	8.21723	8.28123	8.32598	7.82209	7.78398	7.78202	-3.86572	-0.478786	-1.39357
ILMN_3298716	LOC729231	PREDICTED: misc_RNA (LOC729231), miscRNA.		XR_038105.1	729231	6.91409	7.20945	7.02791	6.68089	6.54535	6.49025	-2.4823	-0.47832	-1.39312
ILMN_2404385	REPIN1	replication initiator 1 (REPIN1), transcript variant 2	Zfp464; RIP60; ZNF464; AP4	NM_014374.1	29803	9.61545	9.32057	9.45718	8.71356	9.20506	9.04193	-1.85468	-0.477548	-1.39238
ILMN_1752967	DHPS	deoxyhypusine synthase (DHPS), transcript variant 2	MIG13	NM_013406.1	1725	8.75756	8.55842	8.49386	7.94895	8.32733	8.10171	-2.11874	-0.47728	-1.39212
ILMN_1810289	FER1L3	fer-1-like 3, myoferlin (C. elegans) (FER1L3), transcript variant 2	FLJ36571; FLJ90777; MYOF	NM_133337.1	26509	10.2861	10.2259	10.1877	9.64692	9.91558	9.70684	-2.70879	-0.476803	-1.39166
ILMN_1769758	FANCA	Fanconi anemia, complementation group A (FANCA), transcript variant 2	FAA; FA; FA1; MGC75158; FACA; FAH; FA-H; FANCH	NM_001018112.1	2175	5.40939	5.87283	5.39232	5.21723	4.84298	5.18982	-1.64928	-0.474834	-1.38976
ILMN_1780334	KCNJ2	potassium inwardly-rectifying channel, subfamily J, member 2 (KCNJ2)	IRK1; HHBIRK1; SQT3; HHIRK1; KIR2.1; LQT7	NM_000891.2	3759	6.43796	6.3345	6.27798	5.89724	5.90929	5.82018	-3.29033	-0.474576	-1.38951
ILMN_1696601	VARS	valyl-tRNA synthetase (VARS), nuclear gene encoding mitochondrial protein	G7A; VARS2	NM_006295.2	7407	9.56224	9.55017	9.54632	9.1644	9.13391	8.93782	-2.9478	-0.474199	-1.38915
ILMN_1751086	ATL3	atlastin GTPase 3 (ATL3)	ATL3; DKFZp564J0863	NM_015459.3	25923	9.04685	9.18611	9.20041	8.67243	8.72792	8.61324	-3.17994	-0.473264	-1.38825
ILMN_1756326	CKS2	CDC28 protein kinase regulatory subunit 2 (CKS2)	CKSHS2	NM_001827.1	1164	9.25148	9.09777	9.31673	8.71046	8.6851	8.853	-2.73052	-0.472475	-1.38749
ILMN_1893375		BX400393 T CELLS (JURKAT CELL LINE) COT 10-NORMALIZED cDNA clone CS0DJ011YG15 3-PRIME, mRNA sequence			NA	5.59694	5.59991	5.30743	4.97269	5.1334	4.98185	-2.36267	-0.472111	-1.38714
ILMN_2252813	TAF5L	TAF5-like RNA polymerase II, p300/CBP-associated factor (PCAF)-associated factor, 65kDa (TAF5L), transcript variant 1	PAF65B	NM_014409.3	27097	6.55305	6.29829	6.38198	5.93074	5.77873	6.11061	-2.22785	-0.471078	-1.38615
ILMN_1698646	TUBG1	tubulin, gamma 1 (TUBG1)	TUBG	NM_001070.3	7283	6.55919	6.78398	6.83036	6.16189	6.35226	6.2555	-2.46461	-0.467957	-1.38315
ILMN_3248063	LOC100132920	PREDICTED: misc_RNA (LOC100132920), miscRNA.		XR_037691.1	100132920	5.36807	5.79442	5.52356	5.16993	5.1127	5	-2.08931	-0.467808	-1.38301
ILMN_1708130	EHF	ets homologous factor (EHF)	ESE3; ESEJ	NM_012153.3	26298	7.64241	7.59395	7.27519	6.9542	7.20359	6.95303	-2.01367	-0.466912	-1.38215
ILMN_2150856	SERPINB2	serpin peptidase inhibitor, clade B (ovalbumin), member 2 (SERPINB2)	PAI; HsT1201; PLANH2; PAI-2; PAI2	NM_002575.1	5055	6.24413	6.49506	6.40599	5.96116	5.80735	5.97957	-2.56974	-0.465697	-1.38098
ILMN_1787923	PNPLA2	patatin-like phospholipase domain containing 2 (PNPLA2)	PEDF-R; FP17548; TTS2; TTS-2.2; ATGL; DKFZp667M109; 1110001C14Rik	NM_020376.2	57104	8.73978	8.3672	8.22834	7.87221	8.08108	7.98755	-1.83062	-0.464823	-1.38015
ILMN_1799667	KIF4A	kinesin family member 4A (KIF4A)	HSA271784; KIF4; FLJ12655; FLJ12530; KIF4-G1; FLJ20631; FLJ14204	NM_012310.3	24137	6.52042	6.45121	6.3733	5.90448	5.93546	6.1127	-2.77485	-0.464097	-1.37945
ILMN_2148012	EPR1	effector cell peptidase receptor 1 (non-protein coding) (EPR1), non-coding RNA.	BIRC5OS; EPR-1	NR_002219.1	8475	6.2724	6.00225	6.11478	5.49506	5.83289	5.66959	-2.15981	-0.463964	-1.37933
ILMN_1805175	TGFA	transforming growth factor, alpha (TGFA), transcript variant 2	TFGA	NM_001099691.1	7039	6.54844	6.54844	6.58946	6.11894	6.1918	5.99095	-3.07735	-0.461547	-1.37702
ILMN_1717234	CAST	calpastatin (CAST), transcript variant 11	MGC9402; BS-17	NM_001042445.1	831	8.58609	8.52121	8.33628	7.96347	7.93546	8.16038	-2.39446	-0.461424	-1.3769
ILMN_3305304	POLD2	polymerase (DNA directed), delta 2, regulatory subunit 50kDa (POLD2), transcript variant 1		NM_001127218.1	5425	9.13289	9.06313	9.0359	8.68755	8.70113	8.46025	-2.66463	-0.460992	-1.37649
ILMN_2377385	SERPINA9	serpin peptidase inhibitor, clade A (alpha-1 antiproteinase, antitrypsin), member 9 (SERPINA9), transcript variant B	SERPINA11; GCET1; SERPINA11b; MGC131906	NM_001042518.1	327657	5.61176	5.63227	5.62936	4.91169	5.23649	5.34341	-2.09673	-0.460598	-1.37611
ILMN_2263054	FEZ1	fasciculation and elongation protein zeta 1 (zygin I) (FEZ1), transcript variant 2		NM_022549.2	9638	8.78202	8.81666	8.70356	8.40897	8.1809	8.33092	-2.79886	-0.460483	-1.376
ILMN_2324421	TXNRD1	thioredoxin reductase 1 (TXNRD1), transcript variant 4	TXNR; GRIM-12; MGC9145; TRXR1; TR; TR1	NM_182743.1	7296	10.5721	10.4983	10.3273	9.89194	10.1797	9.94661	-2.25527	-0.459834	-1.37538
ILMN_1912310		yb33d03.s1 Stratagene fetal spleen (937205) cDNA clone IMAGE:72965 3, mRNA sequence			NA	5.37156	5.49825	5.50144	4.96809	5.11686	4.90689	-2.78136	-0.459801	-1.37535
ILMN_2393712	CTTN	cortactin (CTTN), transcript variant 2	EMS1; FLJ34459	NM_138565.1	2017	10.397	10.1467	10.1973	9.4735	10.1092	9.7807	-1.59168	-0.459228	-1.37481
ILMN_1738347	RNPEP	arginyl aminopeptidase (aminopeptidase B) (RNPEP)	DKFZP547H084	NM_020216.3	6051	9.10198	9.08852	8.98527	8.2293	8.90147	8.66782	-1.58216	-0.45906	-1.37465
ILMN_3308663	MIR1228	microRNA 1228 (MIR1228), microRNA.		NR_031597.1	100302201	7.21432	7.31651	7.1809	6.49985	6.91049	6.926	-1.9502	-0.458464	-1.37408
ILMN_1663113	TTLL12	tubulin tyrosine ligase-like family, member 12 (TTLL12)	FLJ41795; KIAA0153; dJ526I14.2	NM_015140.2	23170	8.09803	7.93782	7.94251	7.54612	7.59544	7.46271	-2.9538	-0.458029	-1.37366
ILMN_1698072	PITRM1	pitrilysin metallopeptidase 1 (PITRM1)	MGC141929; KIAA1104; MP1; MGC138192; hMP1	NM_014889.2	10531	9.13571	8.93664	9.03094	8.45039	8.66463	8.61434	-2.59849	-0.457979	-1.37362
ILMN_1788099	LSM4	LSM4 homolog, U6 small nuclear RNA associated (S. cerevisiae) (LSM4)	YER112W	NM_012321.2	25804	9.69	9.57137	9.55536	8.89785	9.41278	9.13391	-1.87099	-0.457396	-1.37306
ILMN_1679919	ASCC2	activating signal cointegrator 1 complex subunit 2 (ASCC2)	ASC1p100	NM_032204.3	84164	9.97384	9.83983	9.99704	9.296	9.73691	9.40599	-1.97974	-0.457271	-1.37294
ILMN_2356890	MRPL42	mitochondrial ribosomal protein L42 (MRPL42), nuclear gene encoding mitochondrial protein, transcript variant 2	PTD007; MRPS32; MRP-L31; RPML31; HSPC204	NM_172177.1	28977	7.02791	6.94017	7.11998	6.63372	6.58646	6.49665	-2.94192	-0.45707	-1.37275
ILMN_2402766	AFTPH	aftiphilin (AFTPH), transcript variant 2	MGC33965; FLJ23793; Nbla10388; FLJ20080	NM_017657.3	54812	7.93782	7.6125	7.6632	7.13545	7.32012	7.38802	-2.11576	-0.456641	-1.37234
ILMN_1699737	TRAP1	TNF receptor-associated protein 1 (TRAP1)	HSP75; HSP90L	NM_016292.1	10131	8.26866	8.32733	8.11842	7.65607	7.95128	7.73877	-2.31036	-0.456096	-1.37182
ILMN_1737517	RPL29	ribosomal protein L29 (RPL29)	HUMRPL29; MGC88589; HIP	NM_000992.2	6159	9.0182	8.9331	8.97871	8.33092	8.65069	8.58045	-2.40243	-0.455985	-1.37172
ILMN_1753111	NAMPT	nicotinamide phosphoribosyltransferase (NAMPT)	DKFZP666B131; PBEF; 1110035O14Rik; NAMPT; MGC117256	NM_005746.2	10135	7.99605	7.91169	7.85549	7.32733	7.79636	7.2724	-1.74663	-0.455715	-1.37146
ILMN_2198185	CXorf12	chromosome X open reading frame 12 (CXorf12)	ITBA1; DXS9878E	NM_003492.1	8269	7.06932	7.22978	7.21432	6.71973	6.68089	6.74953	-3.14385	-0.454421	-1.37023
ILMN_1673069	DPP9	dipeptidyl-peptidase 9 (DPP9)	DPRP2; FLJ16073; DKFZp762F117	NM_139159.3	91039	7.87098	7.69279	7.66959	7.22593	7.37243	7.2724	-2.726	-0.454203	-1.37003
ILMN_2052863	RNF5P1	ring finger protein 5 pseudogene 1 (RNF5P1), non-coding RNA.		NR_003129.1	286140	7.22978	7.18982	7.21917	6.58796	6.83036	6.86171	-2.55846	-0.452915	-1.3688
ILMN_1771051	RPL29	ribosomal protein L29 (RPL29)	HUMRPL29; MGC88589; HIP	NM_000992.2	6159	8.95739	8.84862	8.96203	8.2427	8.59096	8.57592	-2.16394	-0.452822	-1.36872
ILMN_2330341	TCEAL4	transcription elongation factor A (SII)-like 4 (TCEAL4), transcript variant 3	FLJ21174; NPD017; DKFZp686M0279	NM_001006936.1	79921	8.3336	8.33762	8.24174	7.81378	8.00338	7.73742	-2.59121	-0.452798	-1.36869
ILMN_1673380	GNG12	guanine nucleotide binding protein (G protein), gamma 12 (GNG12)	FLJ31352; FLJ34695	NM_018841.4	55970	8.10276	8.13545	8.16892	7.51412	7.91648	7.61839	-2.13779	-0.452718	-1.36862
ILMN_2347541	NIN	ninein (GSK3B interacting protein) (NIN), transcript variant 3	KIAA1565	NM_182945.1	51199	6.81506	6.824	6.61176	6.23649	6.26679	6.3906	-2.60665	-0.452317	-1.36824
ILMN_1834803		BX089493 Soares_total_fetus_Nb2HF8_9w cDNA clone IMAGp998P111937 ; IMAGE:786298, mRNA sequence			NA	6.07468	6.09381	6.01123	5.32193	5.71973	5.78398	-1.90969	-0.451359	-1.36733
ILMN_1726928	TCEA3	transcription elongation factor A (SII), 3 (TCEA3)	TFIIS.H; TFIIS	NM_003196.1	6920	7.29278	7.36107	7.19967	6.79701	6.8125	6.88996	-3.12112	-0.45135	-1.36732
ILMN_2092077	PIP	prolactin-induced protein (PIP)	GPIP4; GCDFP-15; GCDFP15	NM_002652.2	5304	7.72724	7.78136	7.8157	7.20945	7.37678	7.38629	-2.95195	-0.450593	-1.3666
ILMN_2409298	NUSAP1	nucleolar and spindle associated protein 1 (NUSAP1), transcript variant 2	LNP; FLJ13421; SAPL; BM037; PRO0310p1; Q0310; ANKT	NM_018454.5	51203	7.22593	7.37851	7.22593	6.7761	6.84549	6.85798	-3.07164	-0.450266	-1.36629
ILMN_1806266	RAP1GDS1	RAP1, GTP-GDP dissociation stimulator 1 (RAP1GDS1)	MGC118861; MGC118859; GDS1	NM_021159.3	5910	8.51609	8.64277	8.36107	7.82972	8.28725	8.05257	-1.83804	-0.450131	-1.36616
ILMN_3310113	MIR586	microRNA 586 (MIR586), microRNA.		NR_030313.1	693171	7.28263	7.12309	7.22014	6.62205	7.01235	6.64386	-2.00029	-0.449198	-1.36528
ILMN_2155516	QTRTD1	queuine tRNA-ribosyltransferase domain containing 1 (QTRTD1)	FLJ12960	NM_024638.2	79691	7.53294	7.50303	7.37938	6.92481	7.1416	7.01011	-2.65088	-0.446277	-1.36252
ILMN_1654637	SETD5	PREDICTED: SET domain containing 5, transcript variant 39 (SETD5)		XM_944303.2	55209	6.65392	6.41109	6.75221	5.89724	6.38024	6.20163	-1.69357	-0.446034	-1.36229
ILMN_2357438	AURKA	aurora kinase A (AURKA), transcript variant 3	STK15; STK7; AURA; AIK; BTAK; AURORA2; ARK1; MGC34538; STK6	NM_198434.1	6790	8.67525	8.61176	8.60622	8.2384	8.26397	8.05311	-2.79153	-0.445915	-1.36218
ILMN_1685916	KIF2C	kinesin family member 2C (KIF2C)	KNSL6; MCAK	NM_006845.2	11004	6.8936	6.86542	6.86419	6.34341	6.50303	6.44128	-3.24555	-0.445164	-1.36147
ILMN_2396571	GPR108	G protein-coupled receptor 108 (GPR108), transcript variant 1	LUSTR2; MGC14393	NM_001080452.1	56927	7.35579	7.26303	7.32553	6.82782	7.00113	6.78005	-2.7441	-0.445121	-1.36143
ILMN_2245305	ABHD12	abhydrolase domain containing 12 (ABHD12), transcript variant 1	DKFZP434P106; dJ965G21.2; C20orf22; ABHD12A; BEM46L2	NM_001042472.1	26090	7.17393	7.21529	7.25267	6.5744	6.95884	6.77479	-2.18997	-0.444616	-1.36095
ILMN_2366634	PKM2	pyruvate kinase, muscle (PKM2), transcript variant 3	PKM; THBP1; MGC3932; OIP3; PK3; TCB; CTHBP	NM_182471.1	5315	11.2182	10.8711	10.8144	10.6182	10.4576	10.4958	-1.97439	-0.444046	-1.36041
ILMN_1737728	CDCA3	cell division cycle associated 3 (CDCA3)	TOME-1; GRCC8; MGC2577	NM_031299.3	83461	7.19377	7.21335	7.27798	7.04111	6.66534	6.64962	-2.01213	-0.443014	-1.35944
ILMN_2089340	FAM127B	family with sequence similarity 127, member B (FAM127B), transcript variant 1	MAR8A; DKFZp564B147; DKFZP564B147; MGC8471; CXX1b	NM_001078172.1	26071	6.32553	6.27612	6.16993	5.88996	5.72247	5.83036	-2.82367	-0.442932	-1.35936
ILMN_2049021	PTTG3P	pituitary tumor-transforming 3 (pseudogene) (PTTG3P), non-coding RNA.	rcPTTG1	NR_002734.1	26255	9.18562	9.11738	9.15709	8.71528	8.75889	8.65714	-3.53763	-0.442931	-1.35936
ILMN_1765796	ENO2	enolase 2 (gamma, neuronal) (ENO2)	NSE	NM_001975.2	2026	9.15886	9.16817	9.04685	8.8205	8.60844	8.61875	-2.616	-0.442065	-1.35855
ILMN_1787762	HEATR1	HEAT repeat containing 1 (HEATR1)	MGC72083; FLJ10359; RP11-385F5.3; BAP28	NM_018072.4	55127	9.09935	8.94427	8.97039	8.30925	8.82082	8.55804	-1.80405	-0.44197	-1.35846
ILMN_1744959	NFX1	nuclear transcription factor, X-box binding 1 (NFX1), transcript variant 1	MGC20369; NFX2; DKFZp779G2416	NM_002504.3	4799	6.64962	6.38198	6.47086	5.83794	6.1375	6.20359	-1.94333	-0.441138	-1.35767
ILMN_1661554	DIAPH1	diaphanous homolog 1 (Drosophila) (DIAPH1)	LFHL1; hDIA1; DFNA1; DRF1	NM_005219.2	1729	6.76818	6.66534	6.99095	6.38888	6.36982	6.34341	-2.36087	-0.440791	-1.35735
ILMN_1683609	UBE1	ubiquitin-activating enzyme E1 (UBE1), transcript variant 1	UBA1A; A1S9; A1ST; UBE1X; MGC4781; A1S9T; UBA1; GXP1	NM_003334.2	7317	10.2712	10.1951	10.1672	9.68036	9.8736	9.75739	-2.86363	-0.440725	-1.35729
ILMN_1813837	C9orf9	chromosome 9 open reading frame 9 (C9orf9)		NM_018956.3	11092	6.11061	6.35579	6.10434	5.58496	5.91409	5.74953	-2.04293	-0.44072	-1.35728
ILMN_1780773	LOC400027	PREDICTED: hypothetical gene supported by BC047417, transcript variant 2 (LOC400027)		XM_931434.2	400027	7.66888	7.88631	7.58571	7.19377	7.28448	7.34163	-2.32834	-0.440342	-1.35693
ILMN_1802819	DEPDC1	DEP domain containing 1 (DEPDC1)	SDP35; FLJ20354; DEP.8	NM_017779.3	55635	6.61912	6.70183	6.70321	6.48704	6.17193	6.04439	-1.96405	-0.440267	-1.35686
ILMN_1709043	C9orf46	chromosome 9 open reading frame 46 (C9orf46)	FLJ39176; FLJ14688; AD025; MDS030	NM_018465.2	55848	9.17218	9.02237	9.10486	8.72724	8.52121	8.73403	-2.55382	-0.438975	-1.35564
ILMN_2321416	DIAPH1	diaphanous homolog 1 (Drosophila) (DIAPH1), transcript variant 1	LFHL1; hDIA1; DFNA1; FLJ25265; DRF1	NM_005219.3	1729	8.30058	8.13955	8.08799	7.79051	7.77281	7.64962	-2.61621	-0.438397	-1.3551
ILMN_1747016	CEP55	centrosomal protein 55kDa (CEP55)	URCC6; C10orf3; FLJ10540	NM_018131.3	55165	8.44004	8.38543	8.27798	7.99039	7.89603	7.90207	-2.99726	-0.438321	-1.35503
ILMN_2379469	EIF3B	eukaryotic translation initiation factor 3, subunit B (EIF3B), transcript variant 2	EIF3-P116; MGC131875; EIF3-P110; EIF3S9; PRT1; MGC104664; EIF3-ETA; eIF3b	NM_001037283.1	8662	11.6927	11.8029	11.6603	11.1456	11.5016	11.1952	-2.09377	-0.437866	-1.3546
ILMN_2145670	TNC	tenascin C (hexabrachion) (TNC)	HXB; TN	NM_002160.1	3371	7.99887	8.04439	7.99548	7.45943	7.72928	7.53838	-2.55165	-0.437219	-1.35399
ILMN_1788166	TTK	TTK protein kinase (TTK)	PYT; MPS1L1; FLJ38280; ESK	NM_003318.3	7272	7.19081	7.43212	7.11478	6.85674	6.79312	6.77742	-2.31863	-0.436816	-1.35361
ILMN_1747696	TPM3	tropomyosin 3 (TPM3), transcript variant 1	TM30; MGC3261; TRK; NEM1; TM30nm; FLJ41118; OK/SW-cl.5; TM-5; TPMsk3; hscp30; MGC14582; TM3; MGC72094	NM_152263.2	7170	5.40599	5.48864	5.51412	4.7761	5.30012	5.02237	-1.78582	-0.436721	-1.35352
ILMN_1673363	CD97	CD97 molecule (CD97), transcript variant 1	TM7LN1	NM_078481.2	976	10.0672	9.9642	9.99633	9.54148	9.724	9.45224	-2.4913	-0.436656	-1.35346
ILMN_2280568	ANKRD36	ankyrin repeat domain 36 (ANKRD36)	UNQ2430	NM_198555.3	375248	6.42459	6.2891	6.11686	5.65821	6.08108	5.78136	-1.79208	-0.436631	-1.35344
ILMN_1656184	PI4KAP1	phosphatidylinositol 4-kinase, catalytic, alpha pseudogene 1 (PI4KAP1), non-coding RNA.	FLJ39405	NR_003563.1	728233	6.56224	6.40599	6.28725	6.08746	5.93546	5.92362	-2.35559	-0.436313	-1.35314
ILMN_1678998	LRRC14	leucine rich repeat containing 14 (LRRC14)	KIAA0014	NM_014665.1	9684	7.23745	7.00562	7.33092	6.61324	6.96694	6.6851	-1.85934	-0.436239	-1.35307
ILMN_2157510	BLOC1S1	biogenesis of lysosome-related organelles complex-1, subunit 1 (BLOC1S1)	GCN5L1; MGC87455; BLOS1	NM_001487.1	2647	8.61434	8.41405	8.62717	7.92125	8.09698	8.32912	-1.92523	-0.436071	-1.35292
ILMN_1745119	C7orf11	chromosome 7 open reading frame 11 (C7orf11)	ORF20; ABHS; TTDN1	NM_138701.1	136647	8.04002	8.03947	7.95245	7.39403	7.79377	7.53605	-2.07371	-0.436027	-1.35287
ILMN_1678564	DVL1	dishevelled, dsh homolog 1 (Drosophila) (DVL1), transcript variant 3	DVL; MGC54245	NM_182779.3	1855	5.88996	5.6893	5.90448	5.39575	5.46271	5.31832	-2.55201	-0.435657	-1.35253
ILMN_1658728	ZBTB25	zinc finger and BTB domain containing 25 (ZBTB25)	KUP; ZNF46	NM_006977.2	7597	5.97957	6.16993	6.0268	5.4822	5.74147	5.64962	-2.3508	-0.434336	-1.35129
ILMN_1692260	MAFG	v-maf musculoaponeurotic fibrosarcoma oncogene homolog G (avian) (MAFG), transcript variant 2	MGC20149; MGC13090	NM_032711.2	4097	6.99774	6.9331	6.88387	6.33985	6.48543	6.6865	-2.22182	-0.434311	-1.35127
ILMN_1725471	GK	glycerol kinase (GK), transcript variant 2	GKD; GK1	NM_000167.3	2710	6.67666	6.73877	6.76818	6.19574	6.35226	6.33271	-2.97767	-0.4343	-1.35126
ILMN_3234762	RN5S9	RNA, 5S ribosomal 9 (RN5S9), ribosomal RNA.		NR_023371.1	100169760	7.69697	7.45368	7.56682	7.07788	7.15482	7.18289	-2.60345	-0.433957	-1.35093
ILMN_1807600	NPLOC4	nuclear protein localization 4 homolog (S. cerevisiae) (NPLOC4)	FLJ20657; FLJ23742; NPL4; KIAA1499	NM_017921.1	55666	8.25597	8.0917	7.94895	7.49265	7.83289	7.6703	-1.95246	-0.433592	-1.35059
ILMN_1738530	ATAD3A	ATPase family, AAA domain containing 3A (ATAD3A)	FLJ10709	NM_018188.2	55210	7.65678	7.83352	7.64024	7.52278	7.1416	7.16792	-1.90386	-0.432752	-1.34981
ILMN_2358626	ADK	adenosine kinase (ADK), transcript variant ADK-short	AK	NM_001123.2	132	10.137	10.0807	10.1467	9.60548	9.8679	9.5932	-2.38176	-0.432597	-1.34966
ILMN_2344373	MVP	major vault protein (MVP), transcript variant 1	LRP; VAULT1	NM_017458.2	9961	8.66071	8.41236	8.32238	8.05148	8.01792	8.03012	-2.25748	-0.431976	-1.34908
ILMN_3292320	LOC642513	PREDICTED: misc_RNA (LOC642513), miscRNA.		XR_016174.2	642513	7.74618	7.85736	7.87713	7.24413	7.49426	7.44708	-2.4448	-0.431734	-1.34885
ILMN_1671686	EPB49	erythrocyte membrane protein band 4.9 (dematin) (EPB49)	DMT; DEMATIN	NM_001978.1	2039	5.848	5.56377	5.57894	5.25172	5.1375	5.30743	-2.21543	-0.431351	-1.3485
ILMN_1736176	PLK1	polo-like kinase 1 (Drosophila) (PLK1)	PLK; STPK13	NM_005030.3	5347	6.33985	6.43962	6.35403	6.07468	6.01346	5.75221	-2.22903	-0.43105	-1.34821
ILMN_1711450	TH1L	TH1-like (Drosophila) (TH1L), transcript variant 2	HSPC130; NELF-C; NELF-D; TH1	NM_016397.2	51497	8.39146	8.45409	8.3097	7.91289	8.08852	7.86109	-2.53137	-0.430919	-1.34809
ILMN_1746986	SLC39A3	solute carrier family 39 (zinc transporter), member 3 (SLC39A3), transcript variant 2	ZIP3	NM_213568.1	29985	6.06824	5.90448	5.98185	5.57894	5.58796	5.49506	-2.96148	-0.430873	-1.34805
ILMN_1708101	LMNB2	lamin B2 (LMNB2)	LMN2; LAMB2; MGC2721	NM_032737.2	84823	9.60103	9.57762	9.6575	9.03892	9.40152	9.10486	-2.11219	-0.430281	-1.3475
ILMN_1682935	LYPLAL1	lysophospholipase-like 1 (LYPLAL1)	KIAA1238	NM_138794.2	127018	8.2293	8.32373	8.2075	7.70252	7.89421	7.87344	-2.68589	-0.430119	-1.34734
ILMN_1663401	LARP6	La ribonucleoprotein domain family, member 6 (LARP6), transcript variant 2	FLJ11196; ACHN	NM_197958.1	55323	9.95187	10.2218	10.0992	9.68755	9.6779	9.61802	-2.51765	-0.429816	-1.34706
ILMN_1808837	LOC644029	PREDICTED: similar to 60S ribosomal protein L7a (LOC644029)		XR_017397.1	644029	9.8051	9.62644	9.63463	9.08985	9.21675	9.47046	-1.99083	-0.429706	-1.34696
ILMN_3241904	LOC100134000	PREDICTED: similar to mannosidase, alpha, class 1C, member 1 (LOC100134000)		XM_001721795.1	100134000	8.03562	7.93899	7.7879	7.33002	7.78202	7.36282	-1.70264	-0.429221	-1.34651
ILMN_1796949	TPX2	TPX2, microtubule-associated, homolog (Xenopus laevis) (TPX2)	GD:C20orf1; HCTP4; C20orf1; FLS353; DIL-2; HCA519; DIL2; p100; REPP86; C20orf2	NM_012112.4	22974	7.67666	7.32643	7.46842	6.87036	7.25833	7.05528	-1.78066	-0.429178	-1.34647
ILMN_2344662	HMGA2	high mobility group AT-hook 2 (HMGA2), transcript variant 1	HMGI-C; HMGIC; LIPO; BABL; STQTL9	NM_003483.4	8091	6.80349	6.83794	6.91049	6.35579	6.44791	6.46271	-3.15827	-0.428504	-1.34584
ILMN_1753712	STX10	syntaxin 10 (STX10)	SYN10; hsyn10	NM_003765.1	8677	8.36501	8.19279	8.14211	7.82909	7.90207	7.6837	-2.34296	-0.428348	-1.34569
ILMN_2157099	CCNA1	cyclin A1 (CCNA1)		NM_003914.2	8900	8.04603	7.97097	7.97212	7.54226	7.52982	7.63517	-3.25682	-0.427289	-1.3447
ILMN_1765621	HDGF	hepatoma-derived growth factor (high-mobility group protein 1-like) (HDGF)	DKFZp686J1764; HMG1L2	NM_004494.1	3068	9.58815	9.34563	9.28725	9.01207	8.99548	8.9331	-2.30801	-0.426793	-1.34424
ILMN_1780302	DYNC1H1	dynein, cytoplasmic 1, heavy chain 1 (DYNC1H1)	DNECL; DNCH1; HL-3; DYHC; Dnchc1; KIAA0325; DNCL; p22; DHC1a; DHC1	NM_001376.2	1778	9.77231	9.60548	9.70027	9.13571	9.24816	9.41595	-2.31082	-0.426078	-1.34358
ILMN_2159453	STXBP2	syntaxin binding protein 2 (STXBP2)	pp10122; UNC18B; MUNC18-2; UNC18-2; Hunc18b	NM_006949.1	6813	7.87713	7.70113	7.84172	7.58271	7.34873	7.2114	-2.02057	-0.425716	-1.34324
ILMN_1789702	GBE1	glucan (1,4-alpha-), branching enzyme 1 (glycogen branching enzyme, Andersen disease, glycogen storage disease type IV) (GBE1)	GBE	NM_000158.2	2632	10.849	10.6823	10.5586	10.2218	10.2187	10.3728	-2.2634	-0.42555	-1.34308
ILMN_2345015	PTGES2	prostaglandin E synthase 2 (PTGES2), transcript variant 2	mPGES-2; PGES2; GBF1; C9orf15; MGC11289; FLJ14038	NM_198938.1	80142	9.33606	9.26186	9.24127	8.76852	8.96521	8.82909	-2.75198	-0.425459	-1.343
ILMN_1652369	ERCC1	excision repair cross-complementing rodent repair deficiency, complementation group 1 (includes overlapping antisense sequence) (ERCC1), transcript variant 1	UV20; COFS4	NM_202001.1	2067	6.01569	6.36982	6.04658	5.67525	5.76022	5.72247	-2.06585	-0.424716	-1.34231
ILMN_3246014	C1orf130	chromosome 1 open reading frame 130 (C1orf130)	FLJ42528	NM_001010980.3	400746	5.70044	5.94953	5.86542	5.4363	5.44294	5.36457	-2.53734	-0.423863	-1.34151
ILMN_1663032	FNDC4	fibronectin type III domain containing 4 (FNDC4)	FLJ22362; FRCP1	NM_022823.1	64838	8.87682	8.88783	8.92481	8.52982	8.45368	8.43796	-3.47672	-0.422668	-1.3404
ILMN_2340027	TSPAN4	tetraspanin 4 (TSPAN4), transcript variant 6	NAG-2; NAG2; TETRASPAN; TM4SF7; TSPAN-4	NM_001025238.1	7106	9.2446	9.21844	9.08985	8.73369	8.91109	8.64205	-2.3184	-0.422018	-1.3398
ILMN_1813456	PCBD1	6-pyruvoyl-tetrahydropterin synthase/dimerization cofactor of hepatocyte nuclear factor 1 alpha (TCF1) (PCBD1), transcript variant 2	PHS; PCD; DCOH; PCBD	NM_001001939.1	5092	7.80542	7.84612	7.93899	7.47735	7.32283	7.52435	-2.60035	-0.422	-1.33978
ILMN_1754199	BCL7B	B-cell CLL/lymphoma 7B (BCL7B)		NM_001707.2	9275	6.86047	6.70874	6.84549	6.3505	6.40939	6.39232	-2.98348	-0.42083	-1.3387
ILMN_1794505	SHFM1	split hand/foot malformation (ectrodactyly) type 1 (SHFM1)	SHSF1; DSS1; SHFD1; Shfdg1; ECD; SEM1	NM_006304.1	7979	8.10381	7.79116	8	7.44543	7.56071	7.62717	-2.14708	-0.420554	-1.33844
ILMN_1672908	TWIST1	twist homolog 1 (Drosophila) (TWIST1)	TWIST; ACS3; BPES2; SCS; BPES3	NM_000474.3	7291	8.28031	8.06717	7.95884	7.43713	7.7502	7.85736	-1.70106	-0.420541	-1.33843
ILMN_1732452	MAPKAPK3	mitogen-activated protein kinase-activated protein kinase 3 (MAPKAPK3)	MAPKAP3; 3PK	NM_004635.3	7867	9.20579	9.21941	9.36632	8.88234	9.01095	8.63735	-1.9944	-0.420297	-1.3382
ILMN_1761175	RPS6KB2	ribosomal protein S6 kinase, 70kDa, polypeptide 2 (RPS6KB2)	p70S6Kb; P70-beta-2; S6K-beta2; p70(S6K)-beta; P70-beta-1; KLS; S6K2; SRK; STK14B; P70-beta	NM_003952.2	6199	7.04111	6.93782	6.92244	6.49025	6.63952	6.51096	-2.81184	-0.42021	-1.33812
ILMN_1739645	ANLN	anillin, actin binding protein (ANLN)	DKFZp779A055; Scraps; scra; ANILLIN	NM_018685.2	54443	8.10171	8.11686	8.08534	7.71973	7.69836	7.62571	-3.51252	-0.42004	-1.33796
ILMN_1662097	SLC25A43	solute carrier family 25, member 43 (SLC25A43)		NM_145305.1	203427	6.75355	6.50144	6.39403	6.03562	6.22497	6.12928	-2.00381	-0.419717	-1.33767
ILMN_1795963	OKL38	pregnancy-induced growth inhibitor (OKL38), transcript variant 1	BDGI	NM_013370.2	29948	7.19476	7.28263	7.31107	6.71012	6.97154	6.848	-2.42636	-0.419597	-1.33755
ILMN_2123119	MFSD8	major facilitator superfamily domain containing 8 (MFSD8)	CLN7; MGC33302	NM_152778.1	256471	6.46107	6.43129	6.70598	6.21723	6.04221	6.08108	-2.18788	-0.419272	-1.33725
ILMN_2399304	NAV2	neuron navigator 2 (NAV2), transcript variant 2	STEERIN2; HELAD1; RAINB1; FLJ10633; FLJ23707; FLJ11030; POMFIL2; KIAA1419	NM_145117.3	89797	6.83036	6.79442	7.02569	6.42794	6.47573	6.49185	-2.54942	-0.418313	-1.33636
ILMN_3241021	RNY4	RNA, Ro-associated Y4 (RNY4), small cytoplasmic RNA.	Y4; HY4	NR_004393.1	6086	6.33807	6.07468	6.06609	5.82528	5.51728	5.88509	-1.77885	-0.417065	-1.33521
ILMN_2387990	UBE2J2	ubiquitin-conjugating enzyme E2, J2 (UBC6 homolog, yeast) (UBE2J2), transcript variant 1	NCUBE2; PRO2121	NM_194315.1	118424	7.61176	7.79766	7.62571	7.19967	7.37678	7.2075	-2.41297	-0.417061	-1.3352
ILMN_2367710	PKN1	protein kinase N1 (PKN1), transcript variant 1	PRKCL1; PAK1; PKN; DBK; PRK1; MGC46204	NM_213560.1	5585	7.40599	7.54998	7.38888	7.04658	6.9507	7.09698	-2.66504	-0.416863	-1.33502
ILMN_1813236	C6orf136	chromosome 6 open reading frame 136 (C6orf136)	MGC15854	NM_145029.1	221545	7.42459	7.64458	7.74483	7.03232	7.41278	7.11998	-1.7446	-0.416305	-1.33451
ILMN_1790352	PIGZ	phosphatidylinositol glycan anchor biosynthesis, class Z (PIGZ)	MGC52163; SMP3; FLJ12768	NM_025163.2	80235	6.32733	6.2114	6.14975	5.80735	5.83036	5.80219	-2.92109	-0.416191	-1.3344
ILMN_3241257	POLR3E	polymerase (RNA) III (DNA directed) polypeptide E (80kD) (POLR3E)	RPC5; SIN	NM_018119.2	55718	7.42038	7.54535	7.3637	7.0607	7.11166	6.90929	-2.4355	-0.415927	-1.33416
ILMN_3308335	RNU6-1	RNA, U6 small nuclear 1 (RNU6-1), small nuclear RNA.	U6	NR_004394.1	26827	9.92541	9.66071	9.92481	9.57913	9.17093	9.51353	-1.70451	-0.415781	-1.33402
ILMN_1737580	PPPDE2	PPPDE peptidase domain containing 2 (PPPDE2)	DJ347H13.4; D15Wsu75e; MGC138384	NM_015704.1	27351	9.71596	9.79328	9.6726	9.2854	9.38694	9.26421	-2.93401	-0.415097	-1.33339
ILMN_1751345	AP1S1	adaptor-related protein complex 1, sigma 1 subunit (AP1S1), transcript variant 2	SIGMA1A; CLAPS1; AP19	NM_057089.2	1174	8.98556	8.77512	9.03535	8.47411	8.54535	8.53177	-2.40685	-0.41493	-1.33323
ILMN_1690035	FLYWCH1	FLYWCH-type zinc finger 1 (FLYWCH1), transcript variant 1		NM_032296.2	84256	6.73335	6.62936	6.75489	6.24413	6.53916	6.08958	-1.8265	-0.41491	-1.33322
ILMN_3302919	MYOF	myoferlin (MYOF), transcript variant 1		NM_013451.3	26509	9.66871	9.79067	9.58289	9.30925	9.23146	9.25786	-2.68901	-0.414569	-1.3329
ILMN_1695719	EIF2C2	eukaryotic translation initiation factor 2C, 2 (EIF2C2)	MGC3183; Q10; AGO2	NM_012154.2	27161	7.86357	7.8716	8.13853	7.49985	7.61692	7.51412	-2.21193	-0.414269	-1.33262
ILMN_2077550	RACGAP1	Rac GTPase activating protein 1 (RACGAP1)	HsCYK-4; MgcRacGAP; ID-GAP	NM_013277.2	29127	8.24127	8.02846	8.04876	7.74685	7.71218	7.61692	-2.46751	-0.414179	-1.33254
ILMN_1806123	MRPL23	mitochondrial ribosomal protein L23 (MRPL23), nuclear gene encoding mitochondrial protein	FLJ45387; L23MRP; RPL23; RPL23L	NM_021134.2	6150	9.79912	9.82925	9.72178	9.16616	9.62717	9.31606	-1.80452	-0.413587	-1.33199
ILMN_3200921	LOC642590	PREDICTED: misc_RNA (LOC642590), miscRNA.		XR_016251.2	642590	10.468	10.3484	10.386	10.0055	9.95274	10.006	-3.19428	-0.412703	-1.33118
ILMN_1775380	SMOX	spermine oxidase (SMOX), transcript variant 4	PAO; PAOh1; dJ779E11.1; SMO; MGC1010; C20orf16; FLJ20746	NM_175842.1	54498	9.18933	8.92214	8.92125	8.40173	8.87744	8.51688	-1.59468	-0.412221	-1.33073
ILMN_1775692	EIF4G3	eukaryotic translation initiation factor 4 gamma, 3 (EIF4G3)	eIF4GII	NM_003760.3	8672	9.17118	8.99746	8.8051	8.50024	8.60474	8.633	-2.03039	-0.41192	-1.33046
ILMN_1748625	TCEAL4	transcription elongation factor A (SII)-like 4 (TCEAL4), transcript variant 4	FLJ21174; NPD017; DKFZp686M0279	NM_001006937.1	79921	10.6458	10.7169	10.5974	10.1567	10.2396	10.3295	-2.73442	-0.411457	-1.33003
ILMN_1710428	CDC2	cell division cycle 2, G1 to S and G2 to M (CDC2), transcript variant 1	DKFZp686L20222; CDK1; MGC111195; CDC28A	NM_001786.2	983	7.14466	7.18686	7.20261	6.91169	6.8679	6.52042	-1.91619	-0.411373	-1.32995
ILMN_1777058	HIATL1	hippocampus abundant transcript-like 1 (HIATL1)	FLJ14753; MGC117350	NM_032558.2	84641	7.71836	7.66035	7.59096	7.04111	7.37591	7.32012	-2.05811	-0.410844	-1.32946
ILMN_1761566	C5orf32	chromosome 5 open reading frame 32 (C5orf32)	ORF1-FL49	NM_032412.3	84418	9.37959	9.19057	9.19967	8.74719	8.88173	8.90899	-2.42962	-0.410643	-1.32928
ILMN_3212833	LOC728139	PREDICTED: misc_RNA (LOC728139), miscRNA.		XR_015301.2	728139	11.598	11.433	11.4782	11.0023	11.2036	11.0714	-2.46495	-0.410623	-1.32926
ILMN_1683096	ASB1	ankyrin repeat and SOCS box-containing 1 (ASB1)	MGC11165; KIAA1146; ASB-1	NM_016114.3	51665	9.46434	9.53275	9.50522	9.0182	9.17193	9.08082	-2.96223	-0.410453	-1.3291
ILMN_1686401	LOC728739	PREDICTED: similar to programmed cell death 2 isoform 2 (LOC728739)		XR_015689.1	728739	8.06824	8.02625	7.95652	7.44708	7.7211	7.65177	-2.30301	-0.410352	-1.32901
ILMN_1785336	PMM2	phosphomannomutase 2 (PMM2)	CDGS; CDG1a; CDG1	NM_000303.1	5373	8.43003	8.31107	8.43962	8.14975	7.89845	7.90147	-2.24635	-0.410352	-1.32901
ILMN_1658624	UBXN6	UBX domain protein 6 (UBXN6)	DKFZp667D109; UBXDC2	NM_025241.1	80700	9.00955	8.91976	9.00562	8.64313	8.64566	8.41616	-2.39432	-0.409991	-1.32868
ILMN_1737991	LOC650298	PREDICTED: similar to 40S ribosomal protein S26 (LOC650298)		XM_939387.1	650298	7.58721	7.41616	7.5306	6.91528	7.30104	7.08852	-1.93189	-0.409712	-1.32842
ILMN_1845157		mRNA; cDNA DKFZp547E107 (from clone DKFZp547E107)			NA	6.55459	6.47411	6.47897	6.03122	6.15178	6.09592	-3.0748	-0.409584	-1.3283
ILMN_1750563	CERCAM	cerebral endothelial cell adhesion molecule (CERCAM)	CEECAM1; MGC149621; CerCAM; MGC149620; GLT25D3	NM_016174.3	51148	8.29554	8.0677	8.04275	7.81506	7.71699	7.64602	-2.22584	-0.409308	-1.32805
ILMN_1688455	KIAA0564	KIAA0564 (KIAA0564), transcript variant 1	FLJ21779	NM_015058.1	23078	7.32912	7.46923	7.74551	7.22882	6.94251	7.14466	-1.71511	-0.409291	-1.32803
ILMN_1692651	PHB	prohibitin (PHB)	PHB1	NM_002634.2	5245	9.41638	9.39318	9.50005	8.96838	9.1236	8.98982	-2.76309	-0.409264	-1.32801
ILMN_1686097	TOP2A	topoisomerase (DNA) II alpha 170kDa (TOP2A)	TOP2; TP2A	NM_001067.2	7153	9.23864	9.02375	9.08561	8.8716	8.6756	8.57327	-2.06597	-0.409178	-1.32793
ILMN_1893850		BX097731 Soares_multiple_sclerosis_2NbHMSP cDNA clone IMAGp998C11622, mRNA sequence			NA	6.0045	5.59096	5.74685	5.19771	5.4363	5.4822	-1.70941	-0.408702	-1.32749
ILMN_1716057	CAPN2	calpain 2, (m/II) large subunit (CAPN2)	mCANP; FLJ39928; CANPml; CANPL2	NM_001748.3	824	8.41278	8.22448	8.38198	7.92065	8.03837	7.83415	-2.36521	-0.408688	-1.32748
ILMN_2072296	CKS2	CDC28 protein kinase regulatory subunit 2 (CKS2)	CKSHS2	NM_001827.1	1164	9.97484	9.85081	10.0014	9.55536	9.44419	9.60233	-2.62332	-0.408398	-1.32721
ILMN_1728934	PRC1	protein regulator of cytokinesis 1 (PRC1), transcript variant 2	MGC1671; ASE1; MGC3669	NM_199413.1	9055	9.24198	9.32935	9.2635	8.95041	8.94075	8.7187	-2.40447	-0.408322	-1.32714
ILMN_2219351	CENPO	centromere protein O (CENPO)	MGC11266; CENP-O	NM_024322.1	79172	5.71425	5.73064	5.61471	5.33271	5.16591	5.33628	-2.6073	-0.408231	-1.32706
ILMN_1699521	KIAA1641	PREDICTED: KIAA1641, transcript variant 7 (KIAA1641)		XM_944061.1	57730	7.52121	7.14975	7.1127	6.72792	6.92125	6.91049	-1.74031	-0.407999	-1.32684
ILMN_1719254	TRIM9	tripartite motif-containing 9 (TRIM9), transcript variant 1	SPRING; KIAA0282; RNF91	NM_015163.4	114088	6.6837	6.8125	6.3147	6.15381	6.1416	6.29462	-1.64923	-0.406956	-1.32589
ILMN_1677511	PTGS2	prostaglandin-endoperoxide synthase 2 (prostaglandin G/H synthase and cyclooxygenase) (PTGS2)	PHS-2; COX-2; hCox-2; COX2; PGHS-2; PGG/HS	NM_000963.1	5743	11.141	10.8703	10.9049	10.577	10.4715	10.6488	-2.14808	-0.406311	-1.32529
ILMN_1693221	CENPH	centromere protein H (CENPH)	PMF1; NNF1	NM_022909.3	64946	6.17991	6.30561	6.12516	5.71973	5.95652	5.71699	-2.18888	-0.405809	-1.32483
ILMN_1781536	FAH	fumarylacetoacetate hydrolase (fumarylacetoacetase) (FAH)		NM_000137.1	2184	8.0954	8.06016	8.05582	7.6858	7.74953	7.56148	-2.76673	-0.404855	-1.32396
ILMN_2285996	KIAA0101	KIAA0101 (KIAA0101), transcript variant 1	L5; p15(PAF); OEATC1; OEATC-1; NS5ATP9	NM_014736.4	9768	8.49905	8.26772	8.29737	7.77742	8.04494	8.02791	-1.99654	-0.404627	-1.32375
ILMN_3199755	LOC646821	PREDICTED: similar to beta-actin (LOC646821)		XM_929781.1	646821	9.47188	9.48623	9.47249	8.89936	9.10329	9.21578	-2.21486	-0.404059	-1.32323
ILMN_1694587	EEF1B2	eukaryotic translation elongation factor 1 beta 2 (EEF1B2), transcript variant 1	EEF1B; EF1B; EEF1B1	NM_001959.2	1933	12.4923	12.1862	12.396	11.8394	12.0846	11.9408	-1.96978	-0.403257	-1.32249
ILMN_1776464	PARP4	poly (ADP-ribose) polymerase family, member 4 (PARP4)	p193; PARPL; PH5P; ADPRTL1; VPARP; VAULT3	NM_006437.3	143	9.8679	9.85331	9.78807	9.12799	9.65123	9.52101	-1.61931	-0.403012	-1.32227
ILMN_3236653	RNU1-5	RNA, U1 small nuclear 5 (RNU1-5), small nuclear RNA.	HSD4	NR_004400.1	26863	7.13443	6.93192	7	6.38024	6.56682	6.91049	-1.5739	-0.402931	-1.32219
ILMN_3249261	LOC100132299	PREDICTED: similar to MSTP075 (LOC100132299)		XM_001717905.1	100132299	8.02459	7.97671	7.98242	7.35403	7.65607	7.76487	-1.88696	-0.402916	-1.32218
ILMN_2412101	PRKAG1	protein kinase, AMP-activated, gamma 1 non-catalytic subunit (PRKAG1), transcript variant 2	MGC8666; AMPKG	NM_212461.1	5571	7.53838	7.49745	7.73606	7.14364	7.20163	7.22014	-2.40966	-0.402164	-1.32149
ILMN_1796589	TRIP13	thyroid hormone receptor interactor 13 (TRIP13)	16E1BP	NM_004237.2	9319	8.42585	8.53955	8.43254	8.00506	8.14568	8.04166	-2.75876	-0.401845	-1.3212
ILMN_1664030	RAB1B	RAB1B, member RAS oncogene family (RAB1B)		NM_030981.2	81876	7.40939	7.22593	7.21335	6.91049	6.88264	6.8505	-2.58495	-0.401678	-1.32104
ILMN_1677038	FLJ21986	hypothetical protein FLJ21986 (FLJ21986)	FLJ26813	NM_024913.3	79974	7.38284	7.39232	7.39917	7.24031	6.84674	6.88264	-1.86389	-0.401542	-1.32092
ILMN_1738725	LIF	leukemia inhibitory factor (cholinergic differentiation factor) (LIF)	HILDA; D-FACTOR; CDF	NM_002309.2	3976	8.64277	8.47857	8.58684	8.09223	8.21335	8.19918	-2.65257	-0.401141	-1.32055
ILMN_1697000	KIAA0258	PREDICTED: KIAA0258, transcript variant 3 (KIAA0258)		XM_941746.1	9827	5.87036	5.77083	6.0045	5.47573	5.44626	5.52042	-2.495	-0.401094	-1.32051
ILMN_2109526	CSNK2A1P	casein kinase 2, alpha 1 polypeptide pseudogene (CSNK2A1P), non-coding RNA.		NR_002207.1	283106	7.46025	7.30561	7.39917	6.88387	7.06609	7.01235	-2.50529	-0.400909	-1.32034
ILMN_3271630	FGGY	FGGY carbohydrate kinase domain containing (FGGY), transcript variant 2	FLJ10986; RP11-242B9.1	NM_018291.3	55277	6.16993	6.1819	6.14975	5.71149	5.7866	5.80219	-3.3583	-0.400428	-1.3199
ILMN_1687757	AKR1C4	aldo-keto reductase family 1, member C4 (chlordecone reductase; 3-alpha hydroxysteroid dehydrogenase, type I; dihydrodiol dehydrogenase 4) (AKR1C4)	CDR; CHDR; C11; 3-alpha-HSD; MGC22581; HAKRA; DD4	NM_001818.2	1109	9.57837	9.62223	9.60622	9.13211	9.34762	9.12645	-2.44592	-0.400215	-1.3197
ILMN_1672042	DOLPP1	dolichyl pyrophosphate phosphatase 1 (DOLPP1)	LSFR2	NM_020438.3	57171	7.73471	7.73742	7.69627	7.13648	7.52042	7.31107	-1.98596	-0.400143	-1.31964
ILMN_1726720	NUSAP1	nucleolar and spindle associated protein 1 (NUSAP1), transcript variant 2	LNP; FLJ13421; SAPL; BM037; PRO0310p1; Q0310; ANKT	NM_018454.5	51203	8.49506	8.46434	8.41066	7.99661	8.16491	8.00899	-2.67975	-0.39985	-1.31937
ILMN_1765222	CARS2	cysteinyl-tRNA synthetase 2, mitochondrial (putative) (CARS2), nuclear gene encoding mitochondrial protein	DKFZp686G08243; DKFZp667A2315; FLJ12118	NM_024537.1	79587	7.54998	7.65535	7.51017	7.10329	7.20261	7.21043	-2.75537	-0.399723	-1.31926
ILMN_1747911	CDC2	cell division cycle 2, G1 to S and G2 to M (CDC2), transcript variant 1	DKFZp686L20222; CDK1; MGC111195; CDC28A	NM_001786.2	983	8.71802	8.90207	8.83668	8.28864	8.60733	8.36282	-1.99632	-0.399329	-1.31889
ILMN_1678300	MGC40489	PREDICTED: hypothetical protein MGC40489 (MGC40489), misc RNA.		XR_016048.1	146880	8.61545	8.45984	8.70701	8.07628	8.41066	8.09751	-1.81766	-0.399284	-1.31885
ILMN_3251155	PCBP2	poly(rC) binding protein 2 (PCBP2), transcript variant 1		NM_005016.5	5094	6.72383	6.7211	6.55152	6.35931	6.31832	6.12102	-2.18468	-0.399268	-1.31884
ILMN_2166093	PIK3C2A	phosphoinositide-3-kinase, class 2, alpha polypeptide (PIK3C2A)	PI3-K-C2A; DKFZp686L193; PI3-K-C2(ALPHA); MGC142218; CPK	NM_002645.1	5286	6.36632	6.69905	6.60437	6.08534	6.29829	6.08958	-1.88932	-0.398843	-1.31845
ILMN_1758938	SLC31A2	solute carrier family 31 (copper transporters), member 2 (SLC31A2)	hCTR2; CTR2; COPT2	NM_001860.2	1318	7.12516	7.24888	6.98641	6.59096	6.86542	6.70874	-1.99664	-0.398439	-1.31808
ILMN_1727617	XRN2	5-3 exoribonuclease 2 (XRN2)		NM_012255.3	22803	8.27426	8.50661	8.15634	7.8189	8.10696	7.8189	-1.72484	-0.397481	-1.31721
ILMN_1671207	IARS2	isoleucyl-tRNA synthetase 2, mitochondrial (IARS2), nuclear gene encoding mitochondrial protein	FLJ10326	NM_018060.3	55699	10.272	10.2769	10.2485	9.73183	9.97154	9.90207	-2.46108	-0.397353	-1.31709
ILMN_1766675	CDH6	cadherin 6, type 2, K-cadherin (fetal kidney) (CDH6)	KCAD	NM_004932.2	1004	8.58195	8.69	8.68545	8.18686	8.30104	8.27798	-2.8511	-0.397174	-1.31693
ILMN_1757631	DBNDD1	dysbindin (dystrobrevin binding protein 1) domain containing 1 (DBNDD1), transcript variant 1	MGC3101; FLJ12582	NM_001042610.1	79007	8.1153	7.76553	7.96	7.63009	7.54535	7.47411	-1.98076	-0.397098	-1.31686
ILMN_1691276	CXXC1	CXXC finger 1 (PHD domain) (CXXC1)	SPP1; HsT2645; 5830420C16Rik; hCGBP; CGBP; 2410002I16Rik; PHF18; PCCX1; CFP1	NM_014593.2	30827	8.2503	8.27891	8.20799	7.89542	7.84674	7.80413	-3.22284	-0.396968	-1.31674
ILMN_1750324	IGFBP5	insulin-like growth factor binding protein 5 (IGFBP5)	IBP5	NM_000599.2	3488	12.4235	12.5861	12.6361	12.2168	12.1163	12.1232	-2.45348	-0.396456	-1.31627
ILMN_1750800	ACO1	aconitase 1, soluble (ACO1)	IREBP; IRP1; IREB1	NM_002197.1	48	11.7134	11.7783	11.6588	11.3169	11.3683	11.2764	-2.97266	-0.396314	-1.31614
ILMN_2109994	RAB4B	RAB4B, member RAS oncogene family (RAB4B)	FLJ78649; MGC52123	NM_016154.3	53916	7.09276	7.02237	7.14262	6.63952	6.71287	6.71699	-2.98465	-0.39612	-1.31596
ILMN_1707634	CMC1	COX assembly mitochondrial protein homolog (S. cerevisiae) (CMC1), nuclear gene encoding mitochondrial protein	DKFZp779D0833; MGC61571	NM_182523.1	152100	8.41532	8.2182	8.34829	7.65821	7.98014	8.15583	-1.60611	-0.395875	-1.31574
ILMN_1775008	NCAPD2	non-SMC condensin I complex, subunit D2 (NCAPD2)	hCAP-D2; KIAA0159; CAP-D2; CNAP1	NM_014865.2	9918	7.66605	7.59768	7.62425	7.1467	7.24508	7.31016	-2.79954	-0.395347	-1.31526
ILMN_1812616	MYO1C	myosin IC (MYO1C), transcript variant 3	NMI; MMI-beta; myr2; FLJ23903; MMIb	NM_033375.4	4641	8.02846	7.76288	7.81506	7.29737	7.60511	7.52042	-1.85842	-0.394499	-1.31449
ILMN_1785405	SLC17A9	solute carrier family 17, member 9 (SLC17A9)	FLJ23412	NM_022082.3	63910	5.848	5.61176	5.7761	5.30012	5.45286	5.30012	-2.2376	-0.394252	-1.31426
ILMN_1651684	KIAA0586	KIAA0586 (KIAA0586)	Talpid3	NM_014749.2	9786	6.76155	6.47897	6.46434	6.13955	6.30378	6.07895	-1.90007	-0.394194	-1.31421
ILMN_1659240	MTMR14	myotubularin related protein 14 (MTMR14), transcript variant 2	FLJ22405; C3orf29; hEDTP; FLJ90311	NM_001077525.1	64419	8.33539	8.10434	8.42668	7.824	7.91409	7.9472	-2.04574	-0.393707	-1.31377
ILMN_1729374	ETFB	electron-transfer-flavoprotein, beta polypeptide (ETFB), transcript variant 1	FP585; MADD	NM_001985.2	2109	9.34563	9.24674	9.25786	8.79766	8.93251	8.93899	-2.70784	-0.393688	-1.31375
ILMN_1707551	AFMID	arylformamidase (AFMID)	KF; MGC167063; DKFZp686F03259	NM_001010982.2	125061	7.51491	7.22882	7.3147	6.8679	6.86047	7.14975	-1.81157	-0.393439	-1.31352
ILMN_1691892	TAGLN2	transgelin 2 (TAGLN2)	KIAA0120; HA1756	NM_003564.1	8407	9.62717	9.3505	9.30104	8.97241	9.12412	9.00225	-1.95393	-0.393309	-1.3134
ILMN_1733562	TFB1M	transcription factor B1, mitochondrial (TFB1M)	CGI75; mtTFB; CGI-75	NM_016020.1	51106	8.77446	8.66285	8.604	8.13289	8.4582	8.27146	-2.00064	-0.392917	-1.31305
ILMN_1676393	ATP5G1	ATP synthase, H+ transporting, mitochondrial F0 complex, subunit C1 (subunit 9) (ATP5G1), nuclear gene encoding mitochondrial protein, transcript variant 2	ATP5G; ATP5A	NM_001002027.1	516	9.98214	9.72554	9.89194	9.27263	9.56262	9.5859	-1.82353	-0.392818	-1.31296
ILMN_1744210	SDHA	succinate dehydrogenase complex, subunit A, flavoprotein (Fp) (SDHA), nuclear gene encoding mitochondrial protein	SDHF; SDH2; FP	NM_004168.1	6389	8.23506	8.33985	8.15228	7.75355	7.94603	7.8505	-2.34423	-0.392371	-1.31255
ILMN_1657361	CBX7	chromobox homolog 7 (CBX7)		NM_175709.2	23492	6.36282	6.17393	6.2114	5.65821	5.96809	5.94486	-1.91497	-0.392329	-1.31251
ILMN_1687213	C8orf13	chromosome 8 open reading frame 13 (C8orf13)	DKFZp761G151; MGC120651; MGC120650; D8S265; MGC120649	NM_053279.1	83648	8.20065	8.11114	8.26256	7.68229	7.94953	7.76686	-2.17728	-0.391889	-1.31211
ILMN_1786016	CHD1L	chromodomain helicase DNA binding protein 1-like (CHD1L)	ALC1; CHDL; FLJ22530	NM_004284.3	9557	7.54921	7.4363	7.24698	6.76818	7.14262	7.1467	-1.61124	-0.391661	-1.3119
ILMN_1656118	ZBTB7A	zinc finger and BTB domain containing 7A (ZBTB7A)	MGC99631; FBI1; ZBTB7; LRF; DKFZp547O146; FBI-1; pokemon	NM_015898.2	51341	6.66391	6.75622	6.3345	6.10434	6.12722	6.34873	-1.63403	-0.391449	-1.31171
ILMN_3234884	KIF22	kinesin family member 22 (KIF22)	KNSL4; OBP-1; KID; OBP-2; OBP	NM_007317.1	3835	8.10224	7.76222	7.8679	7.33539	7.64818	7.57516	-1.71868	-0.391207	-1.31149
ILMN_3242211	TMEM187	transmembrane protein 187 (TMEM187)	CXorf12; ITBA1; DXS9878E	NM_003492.2	8269	7.11166	7.12412	7.15381	6.6453	6.8505	6.7211	-2.59035	-0.390896	-1.31121
ILMN_2092693	LSM12	LSM12 homolog (S. cerevisiae) (LSM12)	FLJ30656; MGC104211	NM_152344.1	124801	8.2891	8.11009	8.12722	7.64097	7.84862	7.86419	-2.15336	-0.390877	-1.31119
ILMN_3226641	PLA2G16	phospholipase A2, group XVI (PLA2G16), transcript variant 1		NM_007069.3	11145	5.44294	5.61765	5.53294	5.22497	5.10014	5.09592	-2.51249	-0.390836	-1.31115
ILMN_2363489	BRE	brain and reproductive organ-expressed (TNFRSF1A modulator) (BRE), transcript variant 3	BRCC45; BRCC4	NM_199191.1	9577	8.15431	8.2555	8.10119	7.69418	7.82082	7.824	-2.57071	-0.390665	-1.311
ILMN_2122420	HMGCL	3-hydroxymethyl-3-methylglutaryl-Coenzyme A lyase (HMGCL), nuclear gene encoding mitochondrial protein, transcript variant 1	HL	NM_000191.2	3155	7.824	7.69139	7.81378	7.45121	7.40854	7.29921	-2.56852	-0.390073	-1.31046
ILMN_2398995	MRPL24	mitochondrial ribosomal protein L24 (MRPL24), nuclear gene encoding mitochondrial protein, transcript variant 2	FLJ20917; MRP-L18; MGC22737; MGC9831	NM_024540.2	79590	8.50064	8.22545	8.39232	7.97212	7.96116	8.01514	-2.27505	-0.389998	-1.31039
ILMN_3307221	NAV2	neuron navigator 2 (NAV2), transcript variant 2	STEERIN2; HELAD1; RAINB1; FLJ10633; FLJ23707; FLJ77876; FLJ11030; POMFIL2; KIAA1419	NM_145117.4	89797	7.25077	7.25172	7.1918	6.7866	6.89603	6.84298	-3.06732	-0.389562	-1.31
ILMN_1661717	TFDP1	transcription factor Dp-1 (TFDP1)	DP1; DRTF1; Dp-1	NM_007111.3	7027	9.71699	9.6779	9.6879	9.08614	9.4731	9.35579	-1.90008	-0.389254	-1.30972
ILMN_1711289	GYS1	glycogen synthase 1 (muscle) (GYS1)	GYS; GSY	NM_002103.3	2997	7.37591	7.13955	7.32463	6.78005	7.05853	6.83415	-1.9344	-0.389118	-1.30959
ILMN_3304898	LOC92755	PREDICTED: misc_RNA (LOC92755), miscRNA.		XR_016140.2	92755	10.423	10.3225	10.4298	9.78005	10.2367	9.99124	-1.72055	-0.389103	-1.30958
ILMN_1671933	CLCC1	chloride channel CLIC-like 1 (CLCC1), transcript variant 2	RP11-475E11.6; KIAA0761; MCLC	NM_015127.3	23155	6.73742	6.85549	6.77742	6.2724	6.62644	6.30561	-1.87021	-0.388629	-1.30915
ILMN_1797793	BLVRB	biliverdin reductase B (flavin reductase (NADPH)) (BLVRB)	BVRB; MGC117413; FLR	NM_000713.1	645	8.81666	8.77775	8.84925	8.32912	8.5691	8.37981	-2.34628	-0.388543	-1.30907
ILMN_1815184	ASPM	asp (abnormal spindle) homolog, microcephaly associated (Drosophila) (ASPM)	ASP; FLJ10517; FLJ43117; FLJ10549; Calmbp1; MCPH5; DKFZp686N06184	NM_018136.3	259266	7.79572	7.88081	7.93487	7.48784	7.50621	7.45204	-2.91572	-0.388437	-1.30897
ILMN_1751984	PRKAG1	protein kinase, AMP-activated, gamma 1 non-catalytic subunit (PRKAG1), transcript variant 1	AMPKG; MGC8666	NM_002733.3	5571	8.02901	7.95826	7.95652	7.46271	7.60659	7.70943	-2.35172	-0.388357	-1.3089
ILMN_2397199	NDEL1	nudE nuclear distribution gene E homolog (A. nidulans)-like 1 (NDEL1), transcript variant 2	DKFZp451M0318; EOPA; NUDEL; MITAP1	NM_030808.3	81565	7.59619	7.31651	7.41363	6.88509	7.23649	7.04002	-1.76217	-0.388244	-1.3088
ILMN_1738767	PLP2	proteolipid protein 2 (colonic epithelium-enriched) (PLP2)	MGC126187; A4-LSB; A4	NM_002668.1	5355	7.90929	7.73606	7.68159	7.29278	7.42543	7.4446	-2.23891	-0.388046	-1.30862
ILMN_2138435	MRPS27	mitochondrial ribosomal protein S27 (MRPS27), nuclear gene encoding mitochondrial protein	FLJ21764; KIAA0264; MRP-S27; FLJ23348	NM_015084.1	23107	8.62205	8.60622	8.44501	8.21578	8.09751	8.19623	-2.46963	-0.387924	-1.30851
ILMN_2187718	COX17	COX17 cytochrome c oxidase assembly homolog (S. cerevisiae) (COX17), nuclear gene encoding mitochondrial protein	MGC117386; MGC104397	NM_005694.1	10063	10.6676	10.6542	10.6542	10.1122	10.312	10.3889	-2.25006	-0.387663	-1.30827
ILMN_1750690	ARFIP2	ADP-ribosylation factor interacting protein 2 (ARFIP2)	POR1	NM_012402.2	23647	5.48543	5.43962	5.49506	4.94486	5.22497	5.08746	-2.24881	-0.387606	-1.30822
ILMN_1790978	ATG7	ATG7 autophagy related 7 homolog (S. cerevisiae) (ATG7)	APG7L; DKFZp434N0735; GSA7	NM_006395.1	10533	8.72724	8.84486	8.92214	8.3966	8.59283	8.34341	-2.09962	-0.387132	-1.30779
ILMN_1749930	TMEM48	transmembrane protein 48 (TMEM48)	FLJ12556; NDC1; NET3; FLJ34120; FLJ10407; RP4-654H19.1	NM_018087.3	55706	6.71973	6.72928	6.8009	6.42459	6.43129	6.23266	-2.42431	-0.387125	-1.30779
ILMN_1779530	COG6	component of oligomeric golgi complex 6 (COG6)	COD2; KIAA1134; DKFZp313D191	NM_020751.1	57511	8.11998	8.05148	8.25503	7.76421	7.78136	7.71973	-2.5421	-0.387063	-1.30773
ILMN_3297945	UBA1	ubiquitin-like modifier activating enzyme 1 (UBA1), transcript variant 1	UBA1A; A1S9; A1ST; UBE1X; MGC4781; A1S9T; UBE1; GXP1	NM_003334.3	7317	11.1915	10.901	10.9212	10.4846	10.7153	10.6531	-1.87837	-0.38689	-1.30757
ILMN_1761159	ESYT1	extended synaptotagmin-like protein 1 (ESYT1)	KIAA0747; MBC2	NM_015292.1	23344	9.98655	9.97885	9.93399	9.68562	9.5904	9.46332	-2.47629	-0.386682	-1.30738
ILMN_1767475	CERK	ceramide kinase (CERK), transcript variant 1	KIAA1646; dA59H18.3; hCERK; dA59H18.2; FLJ23239; MGC131878; LK4; FLJ21430; DKFZp434E0211	NM_022766.4	64781	9.17592	9.13391	9.14975	8.70943	8.81602	8.77413	-3.14249	-0.386668	-1.30737
ILMN_1705261	CAPN1	calpain 1, (mu/I) large subunit (CAPN1)	CANPL1; CANP; muCL; muCANP	NM_005186.2	823	9.62425	9.71751	9.73522	9.32778	9.31673	9.27356	-3.02041	-0.386299	-1.30704
ILMN_1757387	UCHL1	ubiquitin carboxyl-terminal esterase L1 (ubiquitin thiolesterase) (UCHL1)	PARK5; Uch-L1; PGP9.5	NM_004181.3	7345	11.7328	11.7237	11.6855	11.1622	11.4309	11.3923	-2.20534	-0.385537	-1.30635
ILMN_2374352	DBNDD1	dysbindin (dystrobrevin binding protein 1) domain containing 1 (DBNDD1), transcript variant 1	MGC3101; FLJ12582	NM_001042610.1	79007	10.6969	10.882	10.7703	10.4394	10.4786	10.2746	-2.23922	-0.385525	-1.30634
ILMN_2043809	PFKM	phosphofructokinase, muscle (PFKM)	PFKX; PFK-1; MGC8699; PFK-M; GSD7	NM_000289.3	5213	8.84235	8.83952	8.79409	8.4271	8.44253	8.4508	-3.60598	-0.385176	-1.30602
ILMN_1763907	C6orf173	chromosome 6 open reading frame 173 (C6orf173)	DKFZp686L1553; CUG2	NM_001012507.1	387103	8.90629	8.91737	9.06151	8.46883	8.46679	8.79442	-1.83785	-0.385045	-1.3059
ILMN_2410929	PAPSS2	3-phosphoadenosine 5-phosphosulfate synthase 2 (PAPSS2), transcript variant 1	SK2; ATPSK2	NM_004670.3	9060	11.9053	11.8351	11.8718	11.4795	11.618	11.36	-2.30506	-0.384865	-1.30574
ILMN_3227341	RFPL4A	PREDICTED: ret finger protein-like 4A (RFPL4A)		XM_001719234.1	342931	6.2555	6.38024	6.10224	5.88996	5.91886	5.7761	-2.12171	-0.384352	-1.30527
ILMN_1736575	TRIM28	tripartite motif-containing 28 (TRIM28)	FLJ29029; TIF1B; RNF96; TF1B; KAP1	NM_005762.2	10155	8.48583	8.1644	8.27752	7.84862	8.03452	7.89178	-1.92785	-0.384274	-1.3052
ILMN_2134224	ATP13A1	ATPase type 13A1 (ATP13A1)	FLJ41786; CGI-152; FLJ31858; FLJ90317; ATP13A; DKFZp761L1623; KIAA1825; FLJ43873	NM_020410.1	57130	7.38111	7.45697	7.29829	7.01569	6.97957	6.98868	-2.80815	-0.384142	-1.30508
ILMN_1774806	SLC9A7	solute carrier family 9 (sodium/hydrogen exchanger), member 7 (SLC9A7)	NHE7; SLC9A6	NM_032591.1	84679	6.53294	6.69488	6.71973	6.27426	6.32912	6.1918	-2.39216	-0.384122	-1.30507
ILMN_1764207	RPRD1A	regulation of nuclear pre-mRNA domain containing 1A (RPRD1A)	FLJ10656; MGC19513	NM_018170.3	55197	8.14568	8.08799	8.14568	7.53838	7.85798	7.83099	-1.98111	-0.383998	-1.30495
ILMN_1786347	TNPO1	transportin 1 (TNPO1), transcript variant 2	TRN; IPO2; KPNB2; MIP; MIP1	NM_153188.2	3842	9.96766	9.91079	9.85953	9.45512	9.63608	9.49486	-2.5117	-0.383976	-1.30493
ILMN_1719205	FBL	fibrillarin (FBL)	RNU3IP1; FLRN; FIB	NM_001436.2	2091	9.71253	9.78202	9.6786	9.08108	9.50184	9.43879	-1.71183	-0.38381	-1.30478
ILMN_1723632	PIGC	phosphatidylinositol glycan anchor biosynthesis, class C (PIGC), transcript variant 1	GPI2; MGC2049	NM_153747.1	5279	8.47897	8.296	8.3015	7.98071	7.94544	7.99944	-2.52629	-0.383625	-1.30462
ILMN_2299045	BMP2K	BMP2 inducible kinase (BMP2K), transcript variant 2	DKFZp434P0116; BIKE; DKFZp434K0614; HRIHFB2017	NM_017593.3	55589	6.2075	6.12516	6.13545	5.57289	5.91409	5.83036	-1.96122	-0.383593	-1.30459
ILMN_2081682	SMAP2	small ArfGAP2 (SMAP2)	SMAP1L; RP1-228H13.3	NM_022733.1	64744	9.66658	9.52806	9.54245	9.01597	9.40408	9.16667	-1.81796	-0.38346	-1.30447
ILMN_1746465	FJX1	four jointed box 1 (Drosophila) (FJX1)	FLJ25593; FLJ22416	NM_014344.2	24147	8.63952	8.50064	8.74012	8.33762	8.25456	8.1416	-2.13013	-0.382169	-1.3033
ILMN_1752159	AHNAK	AHNAK nucleoprotein (AHNAK), transcript variant 2	MGC5395; AHNAKRS	NM_024060.2	79026	6.39575	6.49025	6.57743	6.26866	6.02459	6.02459	-2.0474	-0.381865	-1.30303
ILMN_1665884	REP15	RAB15 effector protein (REP15)		NM_001029874.1	387849	5.72247	5.54844	5.72247	5.29646	5.30378	5.24793	-2.5397	-0.381734	-1.30291
ILMN_1671494	USP5	ubiquitin specific peptidase 5 (isopeptidase T) (USP5), transcript variant 2	ISOT	NM_003481.2	8078	9.596	9.59544	9.58026	9.25951	9.22545	9.14211	-3.05338	-0.381547	-1.30274
ILMN_1657111	C14orf78	PREDICTED: chromosome 14 open reading frame 78 (C14orf78)		XM_001132404.1	113146	8.10957	8.26819	8.19722	7.86481	7.79116	7.77545	-2.66164	-0.381188	-1.30241
ILMN_2403889	PRMT5	protein arginine methyltransferase 5 (PRMT5), transcript variant 2	SKB1; HRMT1L5; IBP72; SKB1Hs; JBP1	NM_001039619.1	10419	8.58571	8.39103	8.44211	7.87836	8.20506	8.19229	-1.80246	-0.381049	-1.30229
ILMN_2412761	MAFG	v-maf musculoaponeurotic fibrosarcoma oncogene homolog G (avian) (MAFG), transcript variant 1	MGC20149; MGC13090	NM_002359.2	4097	6.92244	6.72247	6.63081	6.14568	6.51412	6.47411	-1.62133	-0.380601	-1.30188
ILMN_1720908	TSPAN4	tetraspanin 4 (TSPAN4), transcript variant 2	NAG-2; NAG2; TETRASPAN; TM4SF7; TSPAN-4	NM_001025234.1	7106	6.01569	6.07682	6.07253	5.52669	5.78136	5.71699	-2.25308	-0.38	-1.30134
ILMN_1759801	DPP8	dipeptidyl-peptidase 8 (DPP8), transcript variant 2	FLJ20283; MGC26191; MSTP141; FLJ14920; DPRP1; DP8	NM_017743.4	54878	7.70044	7.66888	7.52042	7.32553	7.2114	7.21335	-2.42213	-0.379823	-1.30118
ILMN_1763884	Magmas	mitochondria-associated protein involved in granulocyte-macrophage colony-stimulating factor signal transduction (Magmas), nuclear gene encoding mitochondrial protein	CGI-136	NM_016069.8	51025	9.13211	9.26585	9.18438	8.61324	8.93634	8.89451	-1.91271	-0.379416	-1.30082
ILMN_1771224	SKA1	spindle and kinetochore associated complex subunit 1 (SKA1), transcript variant 2	MGC10200; Ska1	NM_145060.3	220134	6.34341	6.03782	6.05961	5.83036	5.79701	5.67525	-1.90807	-0.379408	-1.30081
ILMN_1795964	UBR1	ubiquitin protein ligase E3 component n-recognin 1 (UBR1)		NM_174916.1	197131	6.01123	5.93546	5.85549	5.51412	5.61176	5.53916	-2.64394	-0.379045	-1.30048
ILMN_2059535	PPM1F	protein phosphatase 1F (PP2C domain containing) (PPM1F)	POPX2; CaMKPase; FEM-2; hFEM-2; KIAA0015	NM_014634.2	9647	8.74315	8.74685	8.97757	8.26959	8.59694	8.46475	-1.78336	-0.378763	-1.30023
ILMN_1772768	PSG7	pregnancy specific beta-1-glycoprotein 7 (PSG7)		NM_002783.1	5676	6.1375	6.3837	6.08746	5.74416	5.8679	5.86047	-1.99698	-0.378716	-1.30018
ILMN_2053650	AURKAPS1	aurora kinase A pseudogene 1 (AURKAPS1), non-coding RNA.	AurAps1; STK6P	NR_001587.1	6791	5.29278	5.51412	5.32912	4.99095	5.08321	4.926	-2.2009	-0.37862	-1.3001
ILMN_1670218	EXOSC6	exosome component 6 (EXOSC6)	hMtr3p; MTR3; p11; EAP4; Mtr3p	NM_058219.2	118460	7.44543	7.31288	7.39403	7.02901	7.03342	6.9542	-2.7822	-0.378572	-1.30005
ILMN_1729281	SPHK2	sphingosine kinase 2 (SPHK2)		NM_020126.3	56848	8.25314	8.31606	8.18785	7.85237	7.89482	7.87467	-2.94017	-0.378392	-1.29989
ILMN_1740319	IFI27L2	interferon, alpha-inducible protein 27-like 2 (IFI27L2)	TLH29; MGC44913	NM_032036.2	83982	10.3692	10.2975	10.5882	9.86264	10.0172	10.2403	-1.64494	-0.37824	-1.29975
ILMN_1778684	BRE	brain and reproductive organ-expressed (TNFRSF1A modulator) (BRE), transcript variant 5	BRCC45; BRCC4	NM_199192.1	9577	8.02625	7.94193	8.00338	7.65535	7.5812	7.60363	-3.06326	-0.377124	-1.29875
ILMN_3250592	FAM86A	family with sequence similarity 86, member A (FAM86A), transcript variant 1		NM_201400.2	196483	7.03672	6.7879	6.83794	6.5345	6.63081	6.36632	-1.90306	-0.376979	-1.29862
ILMN_1753196	PTTG1	pituitary tumor-transforming 1 (PTTG1)	SECURIN; PTTG; MGC138276; EAP1; TUTR1; MGC126883; HPTTG	NM_004219.2	9232	8.27566	8.29692	8.22062	7.90509	7.88142	7.87652	-3.30194	-0.376724	-1.29839
ILMN_1712432	PSMD2	proteasome (prosome, macropain) 26S subunit, non-ATPase, 2 (PSMD2)	MGC14274; S2; TRAP2; P97	NM_002808.3	5708	10.9072	10.7695	10.7162	10.3815	10.4983	10.3832	-2.37665	-0.376653	-1.29833
ILMN_1687958	SLC25A22	solute carrier family 25 (mitochondrial carrier: glutamate), member 22 (SLC25A22), nuclear gene encoding mitochondrial protein	FLJ13044; GC1	NM_024698.4	79751	8.32148	8.21675	8.22738	7.73268	8.13597	7.76951	-1.68776	-0.375816	-1.29757
ILMN_2413278	RPL13	ribosomal protein L13 (RPL13), transcript variant 2	D16S444E; FLJ27454; MGC71373; MGC117342; FLJ27453; BBC1	NM_033251.1	6137	10.3508	10.5351	10.4866	9.98413	10.1288	10.1322	-2.30064	-0.3758	-1.29756
ILMN_1680110	C10orf116	chromosome 10 open reading frame 116 (C10orf116)	APM2	NM_006829.2	10974	9.52884	9.38737	9.32598	8.83226	9.19303	9.09276	-1.76036	-0.374716	-1.29658
ILMN_2119297	SAMD4A	sterile alpha motif domain containing 4A (SAMD4A)	SMGA; SMG; SAMD4; Smaug; KIAA1053; DKFZp434H0350; Smaug1	NM_015589.3	23034	7.13237	7.14466	6.98755	6.81378	6.77083	6.55612	-2.03562	-0.374615	-1.29649
ILMN_2341690	C17orf81	chromosome 17 open reading frame 81 (C17orf81), transcript variant 1	HSPC002; MSTP071; MST071; DERP6	NM_015362.3	23587	7.23936	6.82782	7.01569	6.49346	6.8392	6.62644	-1.5255	-0.374592	-1.29647
ILMN_3243156	AHNAK2	AHNAK nucleoprotein 2 (AHNAK2)	KIAA2019; C14orf78	NM_138420.2	113146	7.26866	7.36545	7.20261	6.92837	6.87774	6.90809	-2.68748	-0.374171	-1.29609
ILMN_1711414	MRPS27	mitochondrial ribosomal protein S27 (MRPS27), nuclear gene encoding mitochondrial protein	FLJ21764; KIAA0264; MRP-S27; FLJ23348	NM_015084.1	23107	8.55842	8.30652	8.27659	7.99039	7.99095	8.03837	-2.07185	-0.373938	-1.29589
ILMN_2393573	RASSF1	Ras association (RalGDS/AF-6) domain family member 1 (RASSF1), transcript variant A	REH3P21; RASSF1A; 123F2; RDA32; NORE2A	NM_007182.4	11186	7.72451	7.75221	7.8009	7.30834	7.51649	7.33271	-2.34677	-0.373364	-1.29537
ILMN_1743145	ERAP2	endoplasmic reticulum aminopeptidase 2 (ERAP2)	LRAP; FLJ23633; FLJ23807; FLJ23701; L-RAP; ERAP2	NM_022350.2	64167	8.90599	8.85019	8.99548	8.44626	8.59134	8.59507	-2.41505	-0.372999	-1.29504
ILMN_1679401	TRPM4	transient receptor potential cation channel, subfamily M, member 4 (TRPM4)	FLJ20041; TRPM4B	NM_017636.2	54795	7.91588	7.86481	7.94486	7.38284	7.6844	7.54148	-2.06947	-0.372274	-1.29439
ILMN_3229324	SGK1	serum/glucocorticoid regulated kinase 1 (SGK1), transcript variant 1	SGK	NM_005627.3	6446	11.1093	11.2306	11.0351	10.5398	10.9457	10.7732	-1.68829	-0.372072	-1.29421
ILMN_1652379	SUCLG2	succinate-CoA ligase, GDP-forming, beta subunit (SUCLG2)	G-BETA	NM_003848.1	8801	9.30697	9.23984	9.41003	8.85985	8.97527	9.00562	-2.38172	-0.372031	-1.29417
ILMN_1717173	ECT2	epithelial cell transforming sequence 2 oncogene (ECT2)	FLJ10461; MGC138291	NM_018098.4	1894	8.64133	8.75989	8.87744	8.45204	8.31198	8.40216	-2.19113	-0.370828	-1.2931
ILMN_1710523	ATP8B1	ATPase, class I, type 8B, member 1 (ATP8B1)	FIC1; PFIC1; PFIC; ATPIC; BRIC	NM_005603.3	5205	6.40259	6.40939	6.21529	5.83289	6.13955	5.94251	-1.85684	-0.37077	-1.29304
ILMN_2289093	KIAA1618	KIAA1618 (KIAA1618)		NM_020954.2	57714	6.88874	6.98982	6.95536	6.67101	6.46434	6.58646	-2.36673	-0.370702	-1.29298
ILMN_1666713	LYPLA1	lysophospholipase I (LYPLA1)	LPL1; APT-1; LYSOPLA	NM_006330.2	10434	8.08108	8.07361	7.926	7.42626	7.89966	7.64313	-1.57313	-0.370544	-1.29284
ILMN_3237368	LOC644132	PREDICTED: misc_RNA (LOC644132), miscRNA.		XR_017532.2	644132	7.84298	7.73132	7.66463	7.38198	7.41363	7.33181	-2.52163	-0.370502	-1.2928
ILMN_1732725	SAPS3	SAPS domain family, member 3 (SAPS3)	MGC125712; SAPL; SAP190; SAPLa; DKFZp781E2374; C11orf23; PP6R3; DKFZp781O2362; KIAA1558; FLJ11058; MGC125711; DKFZp781E17107; FLJ43065	NM_018312.3	55291	8.32553	8.11842	8.07414	7.59842	7.97785	7.83036	-1.64948	-0.370487	-1.29279
ILMN_1654545	CPSF1	cleavage and polyadenylation specific factor 1, 160kDa (CPSF1)	HSU37012; P/cl.18; CPSF160	NM_013291.2	29894	7.99774	7.8009	7.76089	7.43962	7.57137	7.43713	-2.11347	-0.370469	-1.29277
ILMN_1674282	PPARD	peroxisome proliferative activated receptor, delta (PPARD), transcript variant 1	PPARB; NUCI; FAAR; PPAR-beta; NUC1; NUCII; MGC3931; NR1C2	NM_006238.2	5467	7.92481	7.59619	7.59917	7.32283	7.35491	7.33181	-1.85871	-0.370206	-1.29254
ILMN_1858668		cDNA FLJ30969 fis, clone HEART2000418			NA	5.76818	5.56071	5.65821	5.23266	5.19771	5.44626	-1.97085	-0.370162	-1.2925
ILMN_1665212	EDC4	enhancer of mRNA decapping 4 (EDC4)	HEDLS; RCD-8; Ge-1	NM_014329.3	23644	8.04221	7.94778	7.94369	7.53528	7.76487	7.52356	-2.11907	-0.369989	-1.29234
ILMN_2399100	FGF5	fibroblast growth factor 5 (FGF5), transcript variant 2	HBGF-5; Smag-82	NM_033143.2	2250	5.76022	6.01792	6.20359	5.64962	5.62644	5.59694	-1.68635	-0.369582	-1.29198
ILMN_1784300	TUBA4A	tubulin, alpha 4a (TUBA4A)	TUBA1; H2-ALPHA; FLJ30169	NM_006000.1	7277	8.67737	8.84078	8.91409	8.44087	8.44294	8.44045	-2.31292	-0.369322	-1.29175
ILMN_2320250	NOL6	nucleolar protein family 6 (RNA-associated) (NOL6), transcript variant gamma	MGC20838; NRAP; MGC14921; bA311H10.1; MGC14896; UTP22; FLJ21959	NM_139235.3	65083	8.76155	8.69384	8.81538	8.35623	8.41827	8.38974	-2.85528	-0.368842	-1.29132
ILMN_2373632	IDH3B	isocitrate dehydrogenase 3 (NAD+) beta (IDH3B), nuclear gene encoding mitochondrial protein, transcript variant 1	FLJ11043; H-IDHB; MGC903	NM_006899.2	3420	8.89724	8.99915	8.91379	8.43421	8.77281	8.49665	-1.8588	-0.368836	-1.29131
ILMN_2171640	ZNF650	zinc finger protein 650 (ZNF650)	MGC126489; FLJ37422; DKFZp434P117; DKFZp686N10185; KIAA2024	NM_172070.2	130507	6.68229	6.85175	6.81378	6.39575	6.47249	6.3733	-2.47183	-0.368762	-1.29124
ILMN_1719256	CKS1B	CDC28 protein kinase regulatory subunit 1B (CKS1B)	PNAS-18; PNAS-16; ckshs1; CKS1	NM_001826.1	1163	9.46985	9.20579	9.33985	8.79442	9.02625	9.08958	-1.77605	-0.368414	-1.29093
ILMN_2075818	ZNF598	zinc finger protein 598 (ZNF598)	FLJ00086; DKFZp762F135	NM_178167.2	90850	9.28933	9.25219	9.2703	8.79019	9.08852	8.82845	-2.00075	-0.368217	-1.29076
ILMN_3263694	LOC100128771	PREDICTED: misc_RNA (LOC100128771), miscRNA.		XR_037860.1	100128771	8.27938	7.98014	8.17143	7.59917	7.91289	7.81442	-1.69558	-0.368155	-1.2907
ILMN_2067370	SNRPF	small nuclear ribonucleoprotein polypeptide F (SNRPF)	SMF	NM_003095.2	6636	10.7742	10.5932	10.7885	10.2339	10.314	10.5054	-1.91545	-0.367533	-1.29014
ILMN_1684205	CIB1	calcium and integrin binding 1 (calmyrin) (CIB1)	SIP2-28; KIP; CALMYRIN; CIB	NM_006384.2	10519	11.7017	11.7507	11.6344	11.1423	11.5082	11.335	-1.82982	-0.367106	-1.28976
ILMN_1789642	DNAJC5	DnaJ (Hsp40) homolog, subfamily C, member 5 (DNAJC5)	CSP; DKFZP434N1429; FLJ13070; DKFZp761N1221; FLJ00118	NM_025219.1	80331	7.10119	6.8189	6.853	6.61471	6.66391	6.39575	-1.73589	-0.366238	-1.28899
ILMN_2390416	BAT3	HLA-B associated transcript 3 (BAT3), transcript variant 3	G3; D6S52E	NM_080703.1	7917	8.03232	7.848	7.90509	7.49905	7.59544	7.59395	-2.39252	-0.365653	-1.28847
ILMN_1770850	PNMA1	paraneoplastic antigen MA1 (PNMA1)	MA1	NM_006029.4	9240	7.76752	7.69	7.66035	7.27891	7.27333	7.46923	-2.26168	-0.365465	-1.2883
ILMN_1769634	STRA13	stimulated by retinoic acid 13 homolog (mouse) (STRA13)	E3; MGC14480	NM_144998.2	201254	9.65392	9.59973	9.75255	9.17642	9.45471	9.27891	-2.00248	-0.365383	-1.28822
ILMN_1804652	PLEKHH3	pleckstrin homology domain containing, family H (with MyTH4 domain) member 3 (PLEKHH3)	FLJ21019	NM_024927.3	79990	8.08852	7.84423	7.90207	7.45861	7.67172	7.61029	-1.95168	-0.364739	-1.28765
ILMN_3296994	LOC728823	PREDICTED: misc_RNA (LOC728823), miscRNA.		XR_015838.2	728823	10.57	10.6997	10.8687	10.3355	10.2339	10.4762	-1.81078	-0.364251	-1.28721
ILMN_1774844	MAPKAPK2	mitogen-activated protein kinase-activated protein kinase 2 (MAPKAPK2), transcript variant 2		NM_032960.2	9261	8.58459	8.40429	8.18933	7.89118	8.08958	8.10486	-1.63256	-0.364196	-1.28716
ILMN_1688098	TBC1D4	TBC1 domain family, member 4 (TBC1D4)	AS160; DKFZp779C0666	NM_014832.2	9882	6.90328	6.89845	6.92125	6.74685	6.41109	6.47249	-1.88539	-0.364183	-1.28715
ILMN_1707336	ARPC4	actin related protein 2/3 complex, subunit 4, 20kDa (ARPC4), transcript variant 2	ARC20; p20-Arc; MGC13544	NM_001024959.1	10093	10.2523	10.0863	9.9613	9.57213	9.8989	9.7364	-1.68425	-0.364149	-1.28712
ILMN_1892708		DB369246 NT2RP3 cDNA clone NT2RP3004061 3, mRNA sequence			NA	5.67807	5.56071	5.56682	5.06609	5.48543	5.16189	-1.6386	-0.364066	-1.28705
ILMN_1779071	FEZ1	fasciculation and elongation protein zeta 1 (zygin I) (FEZ1), transcript variant 1		NM_005103.3	9638	12.0121	12.0833	12.046	11.7359	11.7237	11.5902	-2.58639	-0.363873	-1.28688
ILMN_1657796	STMN1	stathmin 1 (STMN1), transcript variant 1	PR22; PP17; OP18; SMN; LAP18; PP19; Lag	NM_203401.1	3925	8.29829	8.08108	7.97384	7.69209	7.92955	7.64097	-1.65137	-0.363534	-1.28657
ILMN_1678922	HERC4	hect domain and RLD 4 (HERC4), transcript variant 1	KIAA1593; DKFZP564G092	NM_022079.2	26091	9.10879	8.90929	8.88448	8.58871	8.61508	8.60881	-2.25456	-0.363318	-1.28638
ILMN_2105966	SLC35A4	solute carrier family 35, member A4 (SLC35A4)	MGC2541	NM_080670.2	113829	8.33226	8.12257	8.04111	7.74416	7.96174	7.70044	-1.74414	-0.3632	-1.28628
ILMN_1714741	LOC346887	PREDICTED: similar to solute carrier family 16 (monocarboxylic acid transporters), member 14 (LOC346887)		XM_943533.1	346887	7.64097	7.66676	7.52356	7.10119	7.38888	7.25172	-1.97642	-0.363167	-1.28625
ILMN_2347234	PRMT1	protein arginine methyltransferase 1 (PRMT1), transcript variant 3	IR1B4; ANM1; HRMT1L2; HCP1	NM_198318.1	3276	9.41426	9.51668	9.52924	8.9747	9.36238	9.0337	-1.68361	-0.363134	-1.28622
ILMN_1678143	ARHGDIB	Rho GDP dissociation inhibitor (GDI) beta (ARHGDIB)	Ly-GDI; RAP1GN1; GDIA2; D4; LYGDI; GDID4	NM_001175.4	397	10.6909	10.6977	10.6196	10.368	10.3034	10.2478	-2.73993	-0.362968	-1.28607
ILMN_1671427	FBXW4	F-box and WD repeat domain containing 4 (FBXW4)	SHFM3; SHSF3; FBWD4; DAC; FBW4	NM_022039.3	6468	7.91648	7.85736	7.91229	7.47978	7.70667	7.41109	-2.00451	-0.362863	-1.28598
ILMN_2355463	CYFIP1	cytoplasmic FMR1 interacting protein 1 (CYFIP1), transcript variant 2	FLJ45151; SHYC; P140SRA-1	NM_001033028.1	23191	7.73539	7.63009	7.74012	7.36807	7.30287	7.34607	-2.78246	-0.362861	-1.28597
ILMN_1728521	HDAC7A	histone deacetylase 7A (HDAC7A), transcript variant 2	DKFZP586J0917; HDAC7	NM_016596.3	51564	6.58796	6.57894	6.55612	5.91886	6.34341	6.37504	-1.52649	-0.361905	-1.28512
ILMN_2356895	MRPL42	mitochondrial ribosomal protein L42 (MRPL42), nuclear gene encoding mitochondrial protein, transcript variant 2	PTD007; MRPS32; MRP-L31; RPML31; HSPC204	NM_172177.1	28977	8.48985	8.5744	8.69975	8.18735	8.18041	8.31288	-2.19732	-0.361119	-1.28442
ILMN_2412807	DCTN1	dynactin 1 (p150, glued homolog, Drosophila) (DCTN1), transcript variant 2	P135; DAP-150; HMN7B; DP-150	NM_023019.1	1639	10.0268	9.95187	9.89285	9.69488	9.5947	9.49905	-2.28089	-0.360962	-1.28428
ILMN_1678678	SLC37A4	solute carrier family 37 (glucose-6-phosphate transporter), member 4 (SLC37A4)	G6PT3; GSD1b; TRG19; G6PT2; GSD1d; GSD1c; MGC15729; G6PT1; PRO0685	NM_001467.4	2542	8.29783	8.29324	8.53605	7.89542	8.18537	7.96347	-1.73186	-0.360953	-1.28427
ILMN_1655654	MPDU1	mannose-P-dolichol utilization defect 1 (MPDU1)	CDGIF; FLJ14836; SL15; PQLC5; Lec35	NM_004870.1	9526	7.73674	7.65392	7.74618	7.30469	7.29921	7.45039	-2.45083	-0.36085	-1.28418
ILMN_1804415	SMAGP	small cell adhesion glycoprotein (SMAGP), transcript variant 2	MGC149454; MGC149453	NM_001033873.1	57228	8.12412	8.19525	8.13545	7.94603	7.87774	7.54921	-1.68379	-0.360614	-1.28397
ILMN_1733559	LOC100008589	28S ribosomal RNA (LOC100008589), non-coding RNA.		NR_003287.1	100008589	11.8369	11.598	11.7091	11.1272	11.4252	11.5112	-1.60073	-0.360125	-1.28354
ILMN_2216918	SHPK	sedoheptulokinase (SHPK)	CARKL; FLJ32478; SHK	NM_013276.2	23729	8.27798	8.26959	8.31651	8.03837	8.02181	7.72383	-1.86617	-0.360024	-1.28345
ILMN_1782403	PRR11	proline rich 11 (PRR11)	FLJ11029	NM_018304.2	55771	7.0045	6.98299	6.76421	6.50144	6.63227	6.53916	-2.04608	-0.359612	-1.28308
ILMN_3250585	KIAA0194	PREDICTED: KIAA0194 protein (KIAA0194)		XM_001714730.1	22993	7.81442	7.62644	7.83794	7.18686	7.51649	7.49665	-1.66728	-0.359602	-1.28307
ILMN_1734149	LOC388122	PREDICTED: hypothetical LOC388122 (LOC388122)		XM_370865.4	388122	7.91349	7.99718	7.90629	7.37069	7.73268	7.63517	-1.7821	-0.359473	-1.28296
ILMN_1756676	PHF19	PHD finger protein 19 (PHF19), transcript variant 2	MGC131698; PCL3; MGC23929; MGC149713; MGC149712	NM_001009936.1	26147	6.85798	6.64097	6.88753	6.34518	6.55459	6.40939	-1.89903	-0.359104	-1.28263
ILMN_1777584	KARS	lysyl-tRNA synthetase (KARS)	KIAA0070; KARS2	NM_005548.1	3735	8.5157	8.39832	8.5763	8.09064	8.21189	8.11114	-2.33043	-0.358882	-1.28243
ILMN_1702821	TTLL7	tubulin tyrosine ligase-like family, member 7 (TTLL7)	FLJ23033; RP5-836J3.2; FLJ36855	NM_024686.4	79739	6.72247	6.70598	6.6879	6.29278	6.41616	6.33092	-2.81385	-0.358827	-1.28238
ILMN_1912083		603089645F1 NIH_MGC_120 cDNA clone IMAGE:5228627 5, mRNA sequence			NA	6.67666	6.58496	6.62644	6.27426	6.1819	6.35579	-2.44839	-0.358704	-1.28227
ILMN_1786024	POLR3H	polymerase (RNA) III (DNA directed) polypeptide H (22.9kD) (POLR3H), transcript variant 2	RPC8; MGC29654; MGC111097; KIAA1665	NM_001018052.1	171568	8.02514	7.97499	8.18041	7.62717	7.87836	7.59917	-1.81222	-0.358613	-1.28219
ILMN_1697962	NSMCE1	non-SMC element 1 homolog (S. cerevisiae) (NSMCE1)	NSE1	NM_145080.3	197370	8.78986	8.97928	8.78463	8.39403	8.6886	8.39532	-1.7345	-0.358608	-1.28219
ILMN_3289730	LOC100132199	PREDICTED: misc_RNA (LOC100132199), miscRNA.		XR_039723.1	100132199	7.75221	7.49185	7.87406	7.27053	7.29921	7.4733	-1.63626	-0.358363	-1.28197
ILMN_1812940	TRMT1	TRM1 tRNA methyltransferase 1 homolog (S. cerevisiae) (TRMT1)	TRM1; FLJ20244	NM_017722.2	55621	8.03507	8.07414	8.1467	7.71768	7.78921	7.67455	-2.62431	-0.358161	-1.28179
ILMN_3237099	LOC100134815	PREDICTED: hypothetical protein LOC100134815 (LOC100134815)		XM_001714669.1	100134815	5.51412	5.72247	5.57289	5.37156	4.99548	5.36807	-1.5635	-0.358122	-1.28176
ILMN_1783598	CAB39L	calcium binding protein 39-like (CAB39L), transcript variant 2	bA103J18.3; RP11-103J18.3; MO2L; FLJ12577	NM_001079670.1	81617	6.25361	6.44128	6.54535	5.99774	6.16591	6.00225	-1.87074	-0.358113	-1.28175
ILMN_1760741	NDUFA9	NADH dehydrogenase (ubiquinone) 1 alpha subcomplex, 9, 39kDa (NDUFA9)	MGC111043; NDUFS2L	NM_005002.3	4704	9.18066	8.96521	8.96492	8.67455	8.78103	8.5812	-1.96826	-0.358001	-1.28165
ILMN_1811579	HOMER3	homer homolog 3 (Drosophila) (HOMER3)	HOMER-3	NM_004838.2	9454	7.90569	7.89482	7.99887	7.49506	7.73674	7.49426	-2.02249	-0.357776	-1.28145
ILMN_1719170	WBSCR27	Williams Beuren syndrome chromosome region 27 (WBSCR27)	MGC40131	NM_152559.2	155368	6.46597	6.48382	6.2211	5.90689	6.23649	5.9542	-1.60426	-0.357771	-1.28144
ILMN_2258774	MRPL43	mitochondrial ribosomal protein L43 (MRPL43), nuclear gene encoding mitochondrial protein, transcript variant 1	MGC48892; MGC17989; bMRP36a	NM_032112.2	84545	9.82607	9.66356	9.80558	9.31786	9.39682	9.50779	-2.16916	-0.357578	-1.28127
ILMN_3292551	LOC286157	PREDICTED: misc_RNA (LOC286157), miscRNA.		XR_038597.1	286157	9.12464	9.05121	8.97527	8.58609	8.73775	8.75489	-2.25487	-0.357464	-1.28117
ILMN_2041046	CKS1B	CDC28 protein kinase regulatory subunit 1B (CKS1B)	PNAS-18; PNAS-16; ckshs1; CKS1	NM_001826.1	1163	9.1267	9.03397	9.06124	8.57251	8.74012	8.837	-2.0815	-0.357429	-1.28114
ILMN_1739594	ACOT11	acyl-CoA thioesterase 11 (ACOT11), transcript variant 2	BFIT2; BFIT1; THEA; THEM1; BFIT; KIAA0707; STARD14	NM_147161.2	26027	5.85798	5.82782	5.75489	5.39575	5.48864	5.48543	-2.68644	-0.356956	-1.28072
ILMN_3238028	SNORD58B	small nucleolar RNA, C/D box 58B (SNORD58B), small nuclear RNA.	U58b; RNU58B	NR_002572.1	26790	5.926	6.34341	5.94017	5.73335	5.74147	5.66391	-1.56049	-0.356946	-1.28071
ILMN_1787750	CD200	CD200 molecule (CD200), transcript variant 2	MOX1; MOX2; MRC; OX-2	NM_001004196.2	4345	9.46597	9.40408	9.2914	8.80219	9.25077	9.03782	-1.55867	-0.356889	-1.28066
ILMN_1705151	SF3A3	splicing factor 3a, subunit 3, 60kDa (SF3A3)	SAP61; PRPF9; SF3a60; PRP9	NM_006802.2	10946	8.89209	8.79019	8.75422	8.28216	8.61728	8.46679	-1.82907	-0.356752	-1.28054
ILMN_1656368	ALDH4A1	aldehyde dehydrogenase 4 family, member A1 (ALDH4A1), nuclear gene encoding mitochondrial protein, transcript variant P5CDhS	P5CDh; P5CD; ALDH4; P5CDhL; P5CDhS	NM_170726.1	8659	6.65249	6.56377	6.84298	6.33092	6.33628	6.32193	-2.07167	-0.356702	-1.2805
ILMN_1802292	WDFY2	WD repeat and FYVE domain containing 2 (WDFY2)	RP11-147H23.1; ZFYVE22; WDF2	NM_052950.2	115825	6.71562	6.7761	6.79831	6.30012	6.5345	6.38543	-2.19462	-0.35666	-1.28046
ILMN_2234873	NME2	non-metastatic cells 2, protein (NM23B) expressed in (NME2), transcript variant 3	MGC111212; NM23-H2; NM23B; puf; NDPKB; NDPK-B	NM_001018138.1	4831	7.38802	7.20653	7.30743	6.8392	6.98071	7.01235	-2.16796	-0.356571	-1.28038
ILMN_1743299	PXMP3	peroxisomal membrane protein 3, 35kDa (PXMP3), transcript variant 1	PAF1; PMP35; PEX2; PAF-1; RNF72; PMP3	NM_000318.2	5828	8.47411	8.42878	8.39575	8.11738	8.07146	8.04056	-2.93219	-0.35641	-1.28024
ILMN_1758626	IDS	iduronate 2-sulfatase (Hunter syndrome) (IDS), transcript variant 1	MPS2; SIDS	NM_000202.3	3423	8.83889	8.83447	8.80961	8.50502	8.40386	8.50502	-2.85918	-0.356356	-1.28019
ILMN_1800795	LOC340260	PREDICTED: similar to Unc4.1 homeobox (LOC340260)		XM_294209.6	340260	6.09592	6.00675	5.97499	5.80993	5.56071	5.63807	-2.07438	-0.356314	-1.28015
ILMN_1779828	EDEM1	ER degradation enhancer, mannosidase alpha-like 1 (EDEM1)	KIAA0212; EDEM	NM_014674.1	9695	8.97985	8.92896	8.84235	8.36457	8.67207	8.64566	-1.81805	-0.356288	-1.28013
ILMN_1754126	SH2D5	PREDICTED: SH2 domain containing 5 (SH2D5)		XM_375698.3	400745	6.41109	6.58195	6.71012	6.28725	6.33807	6.00899	-1.59243	-0.356284	-1.28012
ILMN_1692511	TMEM106C	transmembrane protein 106C (TMEM106C)	MGC5576; MGC111210	NM_024056.2	79022	8.41363	8.39403	8.3505	8.05691	7.96867	8.06393	-2.83633	-0.356216	-1.28006
ILMN_2344971	FOXM1	forkhead box M1 (FOXM1), transcript variant 2	TGT3; PIG29; HFH-11; FKHL16; MPP-2; INS-1; HFH11; MPP2; TRIDENT; MPHOSPH2; HNF-3; FOXM1B	NM_021953.2	2305	6.95303	6.74012	6.7761	6.42122	6.62205	6.35755	-1.84471	-0.356142	-1.28
ILMN_1673673	PBK	PDZ binding kinase (PBK)	Nori-3; SPK; FLJ14385; TOPK	NM_018492.2	55872	7.89785	7.86357	7.92422	7.55459	7.56453	7.49825	-3.0486	-0.356087	-1.27995
ILMN_1741599	MEMO1	mediator of cell motility 1 (MEMO1), transcript variant 1	FLJ25031; CGI-27; MEMO; NS5ATP7; C2orf4; DKFZp434I0135	NM_015955.2	51072	8.10852	7.77281	7.85175	7.45861	7.61692	7.58946	-1.76073	-0.35603	-1.2799
ILMN_1667932	LOC652726	PREDICTED: similar to ankyrin repeat domain 36 (LOC652726)		XM_942351.2	652726	6.55152	6.56377	6.732	6.38198	6.3147	6.08321	-1.80328	-0.355799	-1.27969
ILMN_1730523	FAM195A	family with sequence similarity 195, member A (FAM195A)	c349E10.1; MGC104301; MGC15416	NM_138418.2	84331	7.78594	7.88935	7.74079	7.40939	7.62278	7.31741	-1.86834	-0.3555	-1.27943
ILMN_1713285	NAPA	N-ethylmaleimide-sensitive factor attachment protein, alpha (NAPA)	SNAPA	NM_003827.2	8775	6.71149	6.36107	6.32012	6.06609	6.24222	6.01792	-1.53634	-0.355484	-1.27941
ILMN_1667306	RANBP10	RAN binding protein 10 (RANBP10)	KIAA1464; FLJ31165	NM_020850.1	57610	6.6014	6.49185	6.48382	6.17592	6.00899	6.32733	-1.87645	-0.354943	-1.27893
ILMN_1906541		wr88a10.x1 NCI_CGAP_Kid11 cDNA clone IMAGE:2494746 3, mRNA sequence			NA	5.54535	5.53916	5.37156	4.9542	5.17792	5.25927	-1.79945	-0.354894	-1.27889
ILMN_2395932	UNC45A	unc-45 homolog A (C. elegans) (UNC45A), transcript variant 3	FLJ10043; SMAP-1; GC-UNC45; IRO039700	NM_001039675.1	55898	9.16767	9.12102	9.01569	8.69244	8.6872	8.86016	-2.18861	-0.35486	-1.27886
ILMN_1655433	BCKDHB	branched chain keto acid dehydrogenase E1, beta polypeptide (maple syrup urine disease) (BCKDHB), nuclear gene encoding mitochondrial protein, transcript variant 2	E1B	NM_000056.2	594	6.48704	6.3906	6.50621	6.13134	6.20163	5.98641	-2.18389	-0.354819	-1.27882
ILMN_3229606	LOC729406	PREDICTED: misc_RNA (LOC729406), miscRNA.		XR_037672.1	729406	7.41278	7.30834	7.13648	7.03342	7.0268	6.73335	-1.63227	-0.354674	-1.2787
ILMN_1726392	NIN	ninein (GSK3B interacting protein) (NIN), transcript variant 2	KIAA1565	NM_020921.3	51199	6.16792	6.37156	6.01792	5.74416	5.7866	5.96347	-1.66984	-0.35439	-1.27844
ILMN_1728676	KIAA0196	KIAA0196 (KIAA0196)	SPG8; MGC111053	NM_014846.3	9897	9.71751	9.55132	9.29989	9.15709	9.19057	9.15886	-1.67343	-0.354067	-1.27816
ILMN_3297577	LOC729841	PREDICTED: misc_RNA (LOC729841), miscRNA.		XR_039304.1	729841	11.193	11.0276	11.019	10.5522	10.8711	10.7543	-1.78156	-0.354026	-1.27812
ILMN_2300970	ETFB	electron-transfer-flavoprotein, beta polypeptide (ETFB), transcript variant 2	MADD; FP585	NM_001014763.1	2109	9.49346	9.39981	9.5859	8.93634	9.33427	9.1467	-1.6343	-0.353952	-1.27806
ILMN_1674038	CTSD	cathepsin D (CTSD)	CLN10; MGC2311; CPSD	NM_001909.3	1509	8.70217	8.44501	8.45121	8.0207	8.28216	8.2341	-1.71371	-0.353812	-1.27793
ILMN_1732071	HIST2H2BE	histone cluster 2, H2be (HIST2H2BE)	H2BFQ; MGC119804; MGC129733; H2B/q; GL105; MGC129734; H2B; MGC119802; H2B.1	NM_003528.2	8349	7.21237	7.39318	7.06824	6.853	6.83415	6.926	-1.88266	-0.353547	-1.2777
ILMN_1755462	UGCGL1	UDP-glucose ceramide glucosyltransferase-like 1 (UGCGL1), transcript variant 1	FLJ23796; HUGT1; FLJ23671	NM_020120.2	56886	7.10329	6.87897	6.85674	6.41954	6.67807	6.68089	-1.70946	-0.353499	-1.27766
ILMN_1728535	COPZ1	coatomer protein complex, subunit zeta 1 (COPZ1)	CGI-120; COPZ; zeta1-COP	NM_016057.1	22818	9.67737	9.30378	9.34762	9.05066	9.18289	9.03507	-1.63154	-0.35338	-1.27755
ILMN_2307656	AGTRAP	angiotensin II receptor-associated protein (AGTRAP), transcript variant 2	MGC29646; ATRAP	NM_001040194.1	57085	7.78202	7.64169	7.86542	7.37764	7.49825	7.35315	-2.09205	-0.353363	-1.27753
ILMN_2173909	ZNF14	zinc finger protein 14 (ZNF14)	GIOT-4; KOX6	NM_021030.2	7561	7.33628	7.17592	6.99322	6.75756	6.92006	6.76818	-1.74986	-0.353211	-1.2774
ILMN_1685678	EEF1B2	eukaryotic translation elongation factor 1 beta 2 (EEF1B2), transcript variant 2	EEF1B; EF1B; EEF1B1	NM_021121.2	1933	8.5611	8.65177	8.53644	8.15785	8.24793	8.28401	-2.50374	-0.353171	-1.27737
ILMN_1778360	PYGB	phosphorylase, glycogen; brain (PYGB)	MGC9213	NM_002862.3	5834	8.52826	8.45162	8.36194	7.99548	8.16641	8.1205	-2.20938	-0.353143	-1.27734
ILMN_1761010	PCCB	propionyl Coenzyme A carboxylase, beta polypeptide (PCCB), nuclear gene encoding mitochondrial protein	DKFZp451E113	NM_000532.3	5096	9.79377	9.72622	9.75171	9.28771	9.52297	9.40173	-2.20091	-0.353092	-1.2773
ILMN_1783337	DECR2	2,4-dienoyl CoA reductase 2, peroxisomal (DECR2)	PDCR	NM_020664.3	26063	7.33092	7.40173	7.2937	7.04658	7.13134	6.78921	-1.7891	-0.353074	-1.27728
ILMN_2189870	FCF1	FCF1 small subunit (SSU) processome component homolog (S. cerevisiae) (FCF1)	C14orf111; MGC99629; Bka; CGI-35	NM_015962.4	51077	6.98071	6.97384	6.86047	6.53605	6.65821	6.56224	-2.45797	-0.352837	-1.27707
ILMN_3248403	LOC100132717	PREDICTED: hypothetical protein LOC100132717 (LOC100132717)		XM_001713656.1	100132717	9.06932	9.10093	9.16214	8.6703	8.80381	8.80025	-2.49425	-0.352672	-1.27692
ILMN_1703246	SBF1	SET binding factor 1 (SBF1), transcript variant 1	DKFZp761D0422; MTMR5; MGC99700	NM_002972.1	6305	8.71287	8.79051	8.82528	8.49665	8.41151	8.36326	-2.50045	-0.352412	-1.27669
ILMN_1810992	CAD	carbamoyl-phosphate synthetase 2, aspartate transcarbamylase, and dihydroorotase (CAD)		NM_004341.3	790	6.57894	6.1918	6.30012	6.10643	5.97039	5.93782	-1.62955	-0.352074	-1.27639
ILMN_1696749	LMNA	lamin A/C (LMNA), transcript variant 2	HGPS; EMD2; FPLD; LDP1; LMNC; FPL; LFP; CDCD1; LGMD1B; IDC; CMT2B1; PRO1; LMN1; CMD1A; CDDC	NM_005572.3	4000	11.4535	11.3379	11.3489	11.0358	11.1952	10.8547	-1.80537	-0.351555	-1.27594
ILMN_1694950	MRPL28	mitochondrial ribosomal protein L28 (MRPL28), nuclear gene encoding mitochondrial protein	MGC8499; MAAT1; p15	NM_006428.3	10573	7.41447	7.2211	7.17193	6.95652	6.99209	6.80478	-1.91586	-0.351373	-1.27577
ILMN_1748034	KLHDC4	kelch domain containing 4 (KLHDC4)	DKFZp434G0522; FLJ00104	NM_017566.2	54758	7.5157	7.57667	7.40259	7.20261	7.30104	6.93782	-1.67573	-0.351164	-1.27559
ILMN_1793563	DCTN1	dynactin 1 (p150, glued homolog, Drosophila) (DCTN1), transcript variant 1	P135; DAP-150; HMN7B; DP-150	NM_004082.2	1639	7.42375	7.14364	7.25644	6.9507	7.00225	6.8189	-1.86825	-0.350658	-1.27514
ILMN_1795055	LRRC3	leucine rich repeat containing 3 (LRRC3)	C21orf102	NM_030891.3	81543	6.49506	6.14975	6.47086	5.88509	6.07895	6.10014	-1.59063	-0.350497	-1.275
ILMN_1739847	EIF3D	eukaryotic translation initiation factor 3, subunit D (EIF3D)	EIF3S7; MGC126526; eIF3-p66; eIF3d; MGC17258; eIF3-zeta	NM_003753.3	8664	10.6063	10.3623	10.3601	10.0268	10.1706	10.08	-1.93005	-0.350432	-1.27494
ILMN_2375003	MAP4K4	mitogen-activated protein kinase kinase kinase kinase 4 (MAP4K4), transcript variant 3	KIAA0687; FLJ90111; FLJ20373; HGK; NIK; FLJ10410; FLH21957	NM_145687.2	9448	7.96521	7.88387	7.92065	7.44294	7.68159	7.5947	-2.14429	-0.350164	-1.27471
ILMN_1815115	CYC1	cytochrome c-1 (CYC1)	UQCR4	NM_001916.3	1537	10.6559	10.5504	10.6652	10.2908	10.3273	10.2032	-2.46868	-0.35001	-1.27457
ILMN_1710479	RGMB	RGM domain family, member B (RGMB), transcript variant 2	FLJ90406; MGC86970; DRAGON	NM_173670.2	285704	5.49185	5.61176	5.57592	5.20945	5.15381	5.26679	-2.53605	-0.349829	-1.27441
ILMN_2112493	DAP	death-associated protein (DAP)	MGC99796	NM_004394.1	1611	9.70287	9.55075	9.5651	9.34274	9.27822	9.14848	-2.12443	-0.34976	-1.27435
ILMN_1682636	CXCL2	chemokine (C-X-C motif) ligand 2 (CXCL2)	MGSA beta; SCYB2; GROb; MIP-2a; CINC-2a; MIP2; MGSA-b; GRO2; MIP2A	NM_002089.3	2920	9.0523	9.31288	9.29278	8.76188	9.04467	8.80252	-1.65418	-0.349631	-1.27423
ILMN_1773645	GMPPB	GDP-mannose pyrophosphorylase B (GMPPB), transcript variant 2	KIAA1851	NM_021971.1	29925	7.66391	7.70598	7.79312	7.37069	7.52199	7.22207	-1.89613	-0.349419	-1.27405
ILMN_2330948	ARF1	ADP-ribosylation factor 1 (ARF1), transcript variant 2		NM_001024228.1	375	8.58796	8.57251	8.57705	8.19476	8.36676	8.12825	-2.1704	-0.349253	-1.2739
ILMN_1703683	COG4	component of oligomeric golgi complex 4 (COG4)	COD1; DKFZp586E1519	NM_015386.2	25839	6.97039	6.89118	6.81634	6.56682	6.56224	6.50144	-2.51318	-0.349139	-1.2738
ILMN_1658144	TRIP11	thyroid hormone receptor interactor 11 (TRIP11)	TRIP230; GMAP-210; CEV14	NM_004239.1	9321	8.19967	8.38241	8.17842	7.82718	7.99039	7.89664	-2.05296	-0.348763	-1.27347
ILMN_1781234	CCDC22	coiled-coil domain containing 22 (CCDC22)	JM1; CXorf37	NM_014008.2	28952	6.22689	6.03562	5.95652	5.79181	5.70321	5.67807	-1.96904	-0.348647	-1.27337
ILMN_1731518	PLD6	phospholipase D family, member 6 (PLD6)		NM_178836.2	201164	5.21723	5.54226	5.56377	5.01346	5.2555	5.00899	-1.52645	-0.348435	-1.27318
ILMN_1736700	ALDOA	aldolase A, fructose-bisphosphate (ALDOA), transcript variant 2	MGC17716; ALDA; MGC10942; MGC17767	NM_184041.1	226	12.6382	12.6616	12.5963	12.1595	12.4298	12.2623	-2.03871	-0.348116	-1.2729
ILMN_1771139	FBXO31	F-box protein 31 (FBXO31)	FBX14; Fbx31; FLJ22477; DKFZP434B027; MGC15419; DKFZp434J1815; MGC9527; FBXO14; pp2386	NM_024735.2	79791	8.05528	7.96694	8.03397	7.77215	7.66249	7.57743	-2.28919	-0.348042	-1.27283
ILMN_1738784	PPP2R5A	protein phosphatase 2, regulatory subunit B, alpha isoform (PPP2R5A)	MGC131915; B56A; PR61A	NM_006243.2	5525	7.13955	6.80993	6.97039	6.58646	6.73064	6.55919	-1.75043	-0.347861	-1.27267
ILMN_1679178	ATP5D	ATP synthase, H+ transporting, mitochondrial F1 complex, delta subunit (ATP5D), nuclear gene encoding mitochondrial protein, transcript variant 1		NM_001687.4	513	7.7761	7.74416	7.67313	7.58871	7.3147	7.24698	-1.7513	-0.347669	-1.2725
ILMN_1735735	KATNB1	katanin p80 (WD repeat containing) subunit B 1 (KATNB1)	KAT	NM_005886.2	10300	8.14975	8.08481	8.19673	7.75556	7.94486	7.6879	-2.00759	-0.347655	-1.27249
ILMN_2169025	JOSD2	Josephin domain containing 2 (JOSD2)	FLJ29018; SBBI54	NM_138334.1	126119	7.41785	7.27798	7.23649	7.07146	7.02791	6.79051	-1.80215	-0.347483	-1.27234
ILMN_1898723		cDNA clone IMAGE:3079901			NA	9.47046	9.65392	9.40748	9.15886	9.21578	9.1153	-2.05328	-0.347305	-1.27218
ILMN_1693430	NME1-NME2	NME1-NME2 readthrough (NME1-NME2)	NME2	NM_001018136.1	654364	7.67172	7.66463	7.70529	7.27333	7.3505	7.37591	-2.82351	-0.347298	-1.27218
ILMN_1694305	SMS	spermine synthase (SMS)	SpS; SPMSY; MRSR; SRS	NM_004595.2	6611	10.3853	10.394	10.216	9.97985	9.92481	10.0489	-2.19977	-0.347271	-1.27215
ILMN_2041236	GARNL4	GTPase activating Rap/RanGAP domain-like 4 (GARNL4)	RAP1GA3; DKFZp686O238; KIAA1039	NM_015085.3	23108	6.69488	6.71287	6.64962	6.29829	6.40088	6.31651	-2.74518	-0.347229	-1.27212
ILMN_1669631	GLRB	glycine receptor, beta (GLRB)		NM_000824.2	2743	6.66249	6.6279	6.56377	6.45121	6.2075	6.15381	-1.86998	-0.347213	-1.2721
ILMN_1799600	STARD8	StAR-related lipid transfer (START) domain containing 8 (STARD8)	DKFZp686H1668; KIAA0189; STARTGAP3; DLC3	NM_014725.2	9754	6.13545	6.13545	6.44626	5.97957	5.89239	5.80478	-1.69222	-0.346809	-1.27174
ILMN_1698209	AGPS	alkylglycerone phosphate synthase (AGPS)	ADHAPS; ADAP-S; ADPS; ALDHPSY; ADAS	NM_003659.1	8540	8.05582	8.25456	8.22352	7.90448	7.65464	7.93487	-1.75213	-0.346637	-1.27159
ILMN_1801710	APBB1IP	amyloid beta (A4) precursor protein-binding, family B, member 1 interacting protein (APBB1IP)	PREL1; INAG1; RIAM; RARP1	NM_019043.3	54518	6.44791	6.30012	6.28355	5.91886	6.03562	6.03782	-2.23388	-0.346425	-1.27141
ILMN_1698404	ERN1	endoplasmic reticulum to nucleus signalling 1 (ERN1), transcript variant 2	MGC163279; IRE1; IRE1P; FLJ30999; MGC163277	NM_152461.2	2081	7.7807	7.67384	7.75422	7.35315	7.35491	7.46271	-2.50484	-0.345999	-1.27103
ILMN_2248863	ZBTB38	zinc finger and BTB domain containing 38 (ZBTB38)	FLJ31131; FLJ22332; FLJ35036	NM_001080412.1	253461	6.45943	6.34873	6.53605	5.96116	6.12516	6.2211	-1.88782	-0.345598	-1.27068
ILMN_1791569	PLXNA1	plexin A1 (PLXNA1)	NOV; PLXN1; NOVP; PLEXIN-A1	NM_032242.2	5361	7.6886	7.51806	7.62571	7.33896	7.30652	7.15076	-2.07792	-0.345377	-1.27048
ILMN_1657893	TXNRD2	thioredoxin reductase 2 (TXNRD2), nuclear gene encoding mitochondrial protein	TRXR2; TR3; SELZ; TR; TR-BETA	NM_006440.3	10587	8.11114	8.04549	8.00282	7.848	7.70667	7.5691	-1.95966	-0.345225	-1.27035
ILMN_1798172	IPO4	importin 4 (IPO4)	MGC131665; FLJ23338; Imp4	NM_024658.3	79711	7.12516	6.98868	7.17592	6.70736	6.85425	6.69349	-2.08176	-0.344891	-1.27005
ILMN_1738699	FXR2	fragile X mental retardation, autosomal homolog 2 (FXR2)	FMR1L2	NM_004860.2	9513	7.82528	7.58195	7.69209	7.43796	7.43713	7.19081	-1.74036	-0.344474	-1.26969
ILMN_1685763	WDR45L	WDR45-like (WDR45L)	WIPI-3; WIPI3	NM_019613.2	56270	8.50859	8.27566	8.29508	7.88692	8.13289	8.02625	-1.78594	-0.344426	-1.26965
ILMN_1729487	GMPR	guanosine monophosphate reductase (GMPR)	GMPR1	NM_006877.2	2766	6.33807	6.43129	6.43463	6.15583	5.97269	6.04221	-2.26951	-0.344418	-1.26964
ILMN_1749641	FBXO3	F-box protein 3 (FBXO3), transcript variant 1	FBA; FBX3; DKFZp564B092	NM_012175.3	26273	7.01569	6.97613	6.86542	6.49665	6.6893	6.63807	-2.11566	-0.344408	-1.26963
ILMN_1769883	IDE	insulin-degrading enzyme (IDE)	FLJ35968; INSULYSIN	NM_004969.1	3416	7.23074	7.41024	7.34607	6.87774	7.05745	7.01903	-2.08034	-0.344274	-1.26951
ILMN_1715309	LOC650885	PREDICTED: hypothetical protein LOC650885 (LOC650885)		XM_939973.1	650885	5.37504	5.53916	5.33271	4.89239	5.21335	5.10852	-1.69353	-0.344214	-1.26946
ILMN_2277523	DIP2A	DIP2 disco-interacting protein 2 homolog A (Drosophila) (DIP2A), transcript variant 3	DIP2; C21orf106	NM_206890.1	23181	6.27984	6.34696	6.22882	5.8679	5.88264	6.07253	-2.09929	-0.344181	-1.26943
ILMN_2389429	DCUN1D4	DCN1, defective in cullin neddylation 1, domain containing 4 (S. cerevisiae) (DCUN1D4), transcript variant 2	KIAA0276; FLJ42355	NM_015115.2	23142	6.97728	7.04876	6.95768	6.56377	6.6893	6.69905	-2.43331	-0.343867	-1.26915
ILMN_3228595	LOC729768	PREDICTED: misc_RNA (LOC729768), miscRNA.		XR_016076.2	729768	11.4401	11.3829	11.4236	10.9279	11.254	11.0332	-1.83589	-0.343862	-1.26915
ILMN_1670542	AK2	adenylate kinase 2 (AK2), transcript variant AK2A	ADK2	NM_001625.2	204	10.0222	10.007	10.1076	9.5932	9.76553	9.74702	-2.25141	-0.343703	-1.26901
ILMN_1753683	SOCS7	suppressor of cytokine signaling 7 (SOCS7)	NAP4	NM_014598.1	30837	5.62352	5.54226	5.59991	5.24413	5.2854	5.20555	-2.79106	-0.343537	-1.26886
ILMN_1742547	NRP1	neuropilin 1 (NRP1), transcript variant 3	NRP; CD304; DKFZp781F1414; VEGF165R; DKFZp686A03134	NM_001024629.1	8829	7.10852	7.01235	6.87283	6.61471	6.6865	6.66249	-2.12842	-0.343333	-1.26868
ILMN_2339627	COPE	coatomer protein complex, subunit epsilon (COPE), transcript variant 3	FLJ13241; epsilon-COP	NM_199444.1	11316	9.50442	9.44626	9.29393	9.03782	9.18958	8.98755	-1.93873	-0.343221	-1.26859
ILMN_1760563	BAT2	HLA-B associated transcript 2 (BAT2)	G2; D6S51E; DKFZp686D09175; D6S51	NM_080686.2	7916	7.92244	7.79377	7.70183	7.56148	7.44791	7.38024	-1.98485	-0.342798	-1.26821
ILMN_2324672	USF2	upstream transcription factor 2, c-fos interacting (USF2), transcript variant 2	FIP	NM_207291.1	7392	7.15583	7.16892	7.10434	6.76288	7.01011	6.6279	-1.68552	-0.342734	-1.26816
ILMN_1663954	TH1L	TH1-like (Drosophila) (TH1L), transcript variant 1	HSPC130; NELF-C; NELF-D; TH1	NM_198976.1	51497	8.96751	8.96665	9.01597	8.64602	8.68685	8.59059	-2.80478	-0.342227	-1.26771
ILMN_1802642	TOM1L1	target of myb1 (chicken)-like 1 (TOM1L1)	SRCASM	NM_005486.1	10040	6.46434	6.42794	6.52669	6.2384	6.0045	6.14975	-2.08944	-0.342108	-1.26761
ILMN_1657708	MGLL	monoglyceride lipase (MGLL), transcript variant 1	MGL; HU-K5	NM_007283.5	11343	6.85425	6.56224	6.59246	6.21529	6.3906	6.37678	-1.72635	-0.342093	-1.26759
ILMN_1680037	FAM65A	family with sequence similarity 65, member A (FAM65A)	FLJ13725; KIAA1930	NM_024519.2	79567	9.74769	9.53761	9.56224	9.26772	9.40812	9.14542	-1.7959	-0.342092	-1.26759
ILMN_1798372	ANXA2P3	annexin A2 pseudogene 3 (ANXA2P3), non-coding RNA.	ANX2L3; LIP2; LPC2C; ANX2P3	NR_001446.2	305	8.51175	8.59171	8.61655	8.22062	8.30561	8.16842	-2.42962	-0.341788	-1.26733
ILMN_1686668	GFM2	G elongation factor, mitochondrial 2 (GFM2), nuclear gene encoding mitochondrial protein, transcript variant 3	hEFG2; EFG2; MST027	NM_170681.1	84340	6.54535	6.81634	6.63372	6.29462	6.31288	6.36282	-1.98591	-0.341697	-1.26725
ILMN_3237623	RNY1	RNA, Ro-associated Y1 (RNY1), small cytoplasmic RNA.	Y1; HY1	NR_004391.1	6084	6.70736	6.39917	6.51412	6.23649	6.06609	6.29462	-1.68228	-0.34115	-1.26677
ILMN_1704342	UBE3C	ubiquitin protein ligase E3C (UBE3C)	KIAA10; KIAA0010	NM_014671.1	9690	8.79701	8.93221	9.01653	8.5988	8.56377	8.55995	-2.20299	-0.341081	-1.2667
ILMN_2078264	C3orf38	chromosome 3 open reading frame 38 (C3orf38)	MGC26717	NM_173824.2	285237	7.21917	7.4814	7.54148	6.96347	7.09381	7.16189	-1.66715	-0.340958	-1.2666
ILMN_1742981	TUBA1A	tubulin, alpha 1a (TUBA1A)	LIS3; FLJ25113; TUBA3; B-ALPHA-1	NM_006009.2	7846	12.727	12.5642	12.5913	12.1448	12.4847	12.2302	-1.67495	-0.340956	-1.2666
ILMN_2383754	GTPBP10	GTP-binding protein 10 (putative) (GTPBP10), transcript variant 1	ObgH2; FLJ38242; UG0751c10; MGC104191; DKFZP686A10121	NM_001042717.1	85865	5.74416	5.50144	5.48864	5.26679	5.33628	5.10852	-1.73286	-0.340883	-1.26653
ILMN_1758412	COPS7A	COP9 constitutive photomorphogenic homolog subunit 7A (Arabidopsis) (COPS7A)	MGC110877	NM_016319.1	50813	10.8013	10.7124	10.7101	10.4333	10.3161	10.4523	-2.4021	-0.340702	-1.26637
ILMN_1683462	GSS	glutathione synthetase (GSS)	MGC14098; GSHS	NM_000178.2	2937	8.16088	8.07788	8.10538	7.69209	7.82528	7.80478	-2.47272	-0.340668	-1.26634
ILMN_1734205	RASSF1	Ras association (RalGDS/AF-6) domain family 1 (RASSF1), transcript variant B	REH3P21; RASSF1A; 123F2; RDA32; NORE2A	NM_170712.1	11186	8.73775	8.64854	8.63227	8.19328	8.41996	8.3837	-2.03575	-0.340539	-1.26623
ILMN_1670079	OMA1	OMA1 homolog, zinc metallopeptidase (S. cerevisiae) (OMA1)	DAB1; ZMPOMA1; 2010001O09Rik; YKR087C; FLJ33782; MPRP-1	NM_145243.3	115209	6.83415	6.61029	6.64674	6.24413	6.44128	6.38543	-1.8838	-0.340113	-1.26586
ILMN_1737604	FLJ10986	hypothetical protein FLJ10986 (FLJ10986)	RP11-242B9.1	NM_018291.2	55277	7.60288	7.73944	7.70044	7.31288	7.39575	7.3147	-2.45077	-0.339813	-1.26559
ILMN_2357015	GRK6	G protein-coupled receptor kinase 6 (GRK6), transcript variant 2	FLJ32135; GPRK6	NM_002082.2	2870	5.96809	5.95652	6.0917	5.59991	5.66391	5.73335	-2.30093	-0.33971	-1.2655
ILMN_1799837	LOC727848	PREDICTED: similar to actin-like protein (LOC727848)		XM_001125941.1	727848	7.45697	7.58195	7.52513	7.08321	7.38284	7.07895	-1.72785	-0.339683	-1.26548
ILMN_1809010	PSMC3	proteasome (prosome, macropain) 26S subunit, ATPase, 3 (PSMC3)	MGC8487; TBP1	NM_002804.4	5702	10.0498	10.0087	9.96939	9.60789	9.83652	9.56472	-1.91671	-0.339605	-1.26541
ILMN_3299365	LOC729406	PREDICTED: misc_RNA (LOC729406), miscRNA.		XR_037260.1	729406	10.6182	10.5078	10.4958	10.2211	10.2624	10.1202	-2.30564	-0.339321	-1.26516
ILMN_1661137	SH3RF2	SH3 domain containing ring finger 2 (SH3RF2)	FLJ23654; MGC149789; MGC149788; RNF158; MGC90410	NM_152550.2	153769	7.70044	7.71905	7.66391	7.44956	7.43129	7.18488	-1.92112	-0.339225	-1.26508
ILMN_2142284	SLC25A43	solute carrier family 25, member 43 (SLC25A43)		NM_145305.1	203427	9.39532	9.434	9.39124	8.97728	9.12205	9.10407	-2.47017	-0.339053	-1.26493
ILMN_1684289	PNPO	pyridoxamine 5-phosphate oxidase (PNPO)	PDXPO; FLJ10535	NM_018129.2	55163	9.59264	9.51076	9.482	9.10198	9.26233	9.20408	-2.30449	-0.339007	-1.26489
ILMN_1664630	CHEK1	CHK1 checkpoint homolog (S. pombe) (CHEK1)	CHK1	NM_001274.3	1111	7.50383	7.5157	7.36807	7.02237	7.27146	7.07682	-1.89458	-0.338983	-1.26486
ILMN_1675131	PIH1D1	PIH1 domain containing 1 (PIH1D1)	NOP17; FLJ20643	NM_017916.1	55011	7.49506	7.47249	7.55766	7.16591	7.08958	7.25456	-2.35387	-0.338382	-1.26434
ILMN_1663195	MCM7	minichromosome maintenance complex component 7 (MCM7), transcript variant 2	MCM2; CDC47; P1.1-MCM3; P1CDC47; CDABP0042; P85MCM; PNAS-146	NM_182776.1	4176	9.71339	9.71407	9.79328	9.41151	9.56834	9.22665	-1.76127	-0.338079	-1.26407
ILMN_1732300	POLR2C	polymerase (RNA) II (DNA directed) polypeptide C, 33kDa (POLR2C)	RPB31; hsRPB3; RPB3; hRPB33	NM_032940.2	5432	8.0954	7.91886	7.97613	7.57137	7.73809	7.66676	-2.10401	-0.338057	-1.26405
ILMN_1735347	MCEE	methylmalonyl CoA epimerase (MCEE)	GLOD2	NM_032601.2	84693	8.38888	8.66249	8.64638	8.03837	8.34917	8.29829	-1.52935	-0.337305	-1.26339
ILMN_3257884	HMGXB4	HMG box domain containing 4 (HMGXB4), transcript variant 1	THC211630; HMGBCG	NM_005487.3	10042	6.2724	6.59842	6.32553	6.06178	6.06609	6.05745	-1.76695	-0.337012	-1.26314
ILMN_2063168	MALL	mal, T-cell differentiation protein-like (MALL)	MGC4419; BENE	NM_005434.3	7851	5.99774	5.90448	5.88996	5.38198	5.62644	5.77347	-1.61309	-0.336768	-1.26292
ILMN_1738103	COPE	coatomer protein complex, subunit epsilon (COPE), transcript variant 2	FLJ13241; epsilon-COP	NM_199442.1	11316	10.5882	10.4715	10.4084	10.0222	10.3295	10.1063	-1.72295	-0.336721	-1.26288
ILMN_3297455	LOC729082	PREDICTED: misc_RNA (LOC729082), miscRNA.		XR_040993.1	729082	7.4814	7.48462	7.77676	7.26303	7.2724	7.19771	-1.7675	-0.336547	-1.26273
ILMN_1674574	VNN1	vanin 1 (VNN1)	MGC116931; HDLCQ8; MGC116930; Tiff66; MGC116933; MGC116932	NM_004666.1	8876	7.01011	6.91409	6.75756	6.43463	6.64818	6.58946	-1.79903	-0.336494	-1.26268
ILMN_3243682	C1orf93	chromosome 1 open reading frame 93 (C1orf93)	MGC26818; DKFZp547M123; RP3-395M20.10	NM_152371.2	127281	6.99548	7.07146	7.27333	6.6851	6.86047	6.78529	-1.79993	-0.336474	-1.26267
ILMN_1718607	TSPAN4	tetraspanin 4 (TSPAN4), transcript variant 3	NAG-2; NAG2; TETRASPAN; TM4SF7; TSPAN-4	NM_001025235.1	7106	10.9838	10.9197	10.9982	10.524	10.7455	10.6242	-2.12456	-0.336021	-1.26227
ILMN_1715583	BOP1	block of proliferation 1 (BOP1)	KIAA0124	NM_015201.3	23246	9.81586	9.90207	9.83178	9.56224	9.63735	9.34207	-1.8444	-0.336018	-1.26227
ILMN_1680955	AURKA	aurora kinase A (AURKA), transcript variant 5	STK15; STK7; AURA; AIK; BTAK; AURORA2; ARK1; MGC34538; STK6	NM_198436.1	6790	8.86202	8.75455	8.79961	8.46679	8.59021	8.35182	-2.03182	-0.335784	-1.26206
ILMN_1696767	SERP2	stress-associated endoplasmic reticulum protein family member 2 (SERP2)	bA269C23.1; RP11-269C23.1; C13orf21; MGC35505	NM_001010897.1	387923	6.55305	6.71973	6.67243	6.33628	6.24982	6.35226	-2.25804	-0.335613	-1.26191
ILMN_3203444	LOC100132535	PREDICTED: misc_RNA (LOC100132535), miscRNA.		XR_038625.1	100132535	10.1758	10.4746	10.2624	10.1025	9.94939	9.85425	-1.64339	-0.335577	-1.26188
ILMN_1785660	SRPR	signal recognition particle receptor (docking protein) (SRPR)	SRP-alpha; MGC9571; MGC3650; Sralpha; DP; MGC17355	NM_003139.2	6734	8.73403	8.66391	8.55075	8.14211	8.51531	8.28494	-1.59109	-0.335447	-1.26177
ILMN_1651692	STK10	serine/threonine kinase 10 (STK10)	PRO2729; LOK	NM_005990.3	6793	6.49665	6.41447	6.36457	6.13545	6.06609	6.06824	-2.49403	-0.335306	-1.26164
ILMN_1801378	COQ3	coenzyme Q3 homolog, methyltransferase (S. cerevisiae) (COQ3)	bA9819.1; UG0215E05	NM_017421.3	51805	7.48462	7.56148	7.47978	7.18388	7.08852	7.24793	-2.34317	-0.335182	-1.26154
ILMN_2096322	ADIPOR1	adiponectin receptor 1 (ADIPOR1)	ACDCR1; TESBP1A; CGI-45; PAQR1; FLJ42464; FLJ25385; CGI45	NM_015999.2	51094	9.5409	9.28679	9.2329	8.91169	9.08321	9.06097	-1.68395	-0.334907	-1.2613
ILMN_1765493	SHKBP1	SH3KBP1 binding protein 1 (SHKBP1)	Sb1; PP203	NM_138392.2	92799	6.97154	6.77873	6.89239	6.5345	6.63952	6.46434	-2.02458	-0.334769	-1.26118
ILMN_1678423	SPA17	sperm autoantigenic protein 17 (SPA17)	SP17; SP17-1	NM_017425.2	53340	7.98868	8.14975	8.04275	7.81186	7.57213	7.79312	-1.85872	-0.334694	-1.26111
ILMN_1789123	PLK4	polo-like kinase 4 (Drosophila) (PLK4)	SAK; STK18	NM_014264.3	10733	7.11374	6.98299	7.11582	6.70874	6.85175	6.64818	-2.03601	-0.334631	-1.26106
ILMN_1678629	DOCK7	dedicator of cytokinesis 7 (DOCK7)	KIAA1771; ZIR2	NM_033407.2	85440	9.96708	10.0631	9.92258	9.55305	9.61637	9.78005	-1.97849	-0.334442	-1.26089
ILMN_2089329	SPRY2	sprouty homolog 2 (Drosophila) (SPRY2)	hSPRY2; MGC23039	NM_005842.2	10253	8.91019	8.88173	9.0588	8.64782	8.64277	8.55689	-2.1996	-0.334414	-1.26086
ILMN_1732772	PPME1	protein phosphatase methylesterase 1 (PPME1)	FLJ22226; PME-1	NM_016147.1	51400	8.48261	8.48543	8.48502	8.15987	8.20604	8.08481	-2.67196	-0.334113	-1.2606
ILMN_2381841	DDX19B	DEAD (Asp-Glu-Ala-As) box polypeptide 19B (DDX19B), transcript variant 2	RNAh; DDX19; DBP5	NM_001014451.1	11269	8.61581	8.78627	8.65356	8.20261	8.52474	8.32688	-1.69615	-0.333805	-1.26033
ILMN_1665583	TUBB	tubulin, beta (TUBB)	M40; OK/SW-cl.56; MGC117247; TUBB1; MGC16435; TUBB5	NM_178014.2	203068	11.0452	10.7837	10.9232	10.538	10.7313	10.4825	-1.69735	-0.333436	-1.26001
ILMN_3284114	LOC399748	PREDICTED: misc_RNA (LOC399748), miscRNA.		XR_018212.1	399748	11.513	11.4795	11.4422	11.1316	11.1284	11.1761	-2.88707	-0.33288	-1.25953
ILMN_3290385	LOC401640	PREDICTED: misc_RNA (LOC401640), miscRNA.		XR_017380.2	401640	9.18636	9.13083	8.90268	8.60511	8.82146	8.79507	-1.66322	-0.332746	-1.25941
ILMN_1770692	WDR12	WD repeat domain 12 (WDR12)	FLJ12719; FLJ12720; FLJ10881; YTM1	NM_018256.2	55759	8.19131	8.2891	8.2724	7.83605	7.92422	7.99435	-2.30155	-0.332726	-1.25939
ILMN_1801121	SENP2	SUMO1/sentrin/SMT3 specific peptidase 2 (SENP2)	AXAM2; SMT3IP2; KIAA1331; DKFZp762A2316	NM_021627.2	59343	7.30743	7.32283	7.13545	6.7211	7.07575	6.97154	-1.57646	-0.332441	-1.25914
ILMN_1675507	AKAP2	A kinase (PRKA) anchor protein 2 (AKAP2), transcript variant 1	PALM2; PRKA2; AKAPKL	NM_001004065.3	11217	6.07895	6	5.88264	5.57592	5.61765	5.77083	-1.93315	-0.332399	-1.25911
ILMN_1761828	E2F4	E2F transcription factor 4, p107/p130-binding (E2F4)	E2F-4	NM_001950.3	1874	8.91109	8.86047	8.77709	8.44832	8.69836	8.40514	-1.75712	-0.332276	-1.259
ILMN_2401779	FAM102A	family with sequence similarity 102, member A (FAM102A), transcript variant 1	MGC50853; C9orf132; EEIG1; bA203J24.7	NM_001035254.1	399665	6.85175	6.83794	6.79181	6.58346	6.50938	6.39232	-2.24063	-0.332117	-1.25886
ILMN_1792495	AHNAK	AHNAK nucleoprotein (AHNAK), transcript variant 1	MGC5395; AHNAKRS	NM_001620.1	79026	6.08108	5.89482	6.00899	5.63517	5.62352	5.73064	-2.15945	-0.331854	-1.25863
ILMN_1808110	TCEB3	transcription elongation factor B (SIII), polypeptide 3 (110kDa, elongin A) (TCEB3)	SIII; TCEB3A	NM_003198.1	6924	8.21529	8.1809	8.17742	7.77676	8.03177	7.77017	-1.87712	-0.331638	-1.25844
ILMN_1892765		hd01g11.x1 Soares_NFL_T_GBC_S1 cDNA clone IMAGE:2908292 3 similar to contains L1.t2 L1 repetitive element ;, mRNA sequence			NA	6.34163	6.28725	6.40088	5.79961	6.1416	6.09381	-1.64511	-0.331582	-1.25839
ILMN_1781983	AP1B1	adaptor-related protein complex 1, beta 1 subunit (AP1B1), transcript variant 2	CLAPB2; ADTB1; BAM22; AP105A	NM_145730.1	162	9.19451	9.09566	9.11608	8.62936	8.91976	8.86357	-1.80388	-0.331192	-1.25805
ILMN_1812503	PHKA1	phosphorylase kinase, alpha 1 (muscle) (PHKA1)	PHKA; MGC132604	NM_002637.2	5255	6.40259	6.48543	6.33092	6.07039	6.15987	5.99548	-2.13719	-0.331061	-1.25794
ILMN_1779258	LOC644774	PREDICTED: similar to Phosphoglycerate kinase 1 (LOC644774)		XM_927868.1	644774	10.5171	10.4507	10.4615	10.0949	10.1653	10.1773	-2.69591	-0.330602	-1.25754
ILMN_2287888	PSMC4	proteasome (prosome, macropain) 26S subunit, ATPase, 4 (PSMC4), transcript variant 1	MIP224; MGC23214; TBP7; MGC13687; S6; MGC8570	NM_006503.2	5704	8.30424	8.40131	8.21091	7.8009	8.14211	7.98185	-1.6318	-0.330533	-1.25748
ILMN_1677800	SGTA	small glutamine-rich tetratricopeptide repeat (TPR)-containing, alpha (SGTA)	hSGT; SGT	NM_003021.3	6449	7.5345	7.36282	7.35755	7.06717	7.06286	7.1334	-2.17203	-0.330483	-1.25743
ILMN_1661695	IRAK3	interleukin-1 receptor-associated kinase 3 (IRAK3)	IRAKM; ASRT5; IRAK-M	NM_007199.1	11213	7.94251	8.03067	8.04494	7.66534	7.70529	7.65678	-2.64079	-0.330239	-1.25722
ILMN_1697597	KIAA0494	KIAA0494 (KIAA0494)	RP11-8J9.3	NM_014774.1	9813	8.68194	8.76155	8.6125	8.34961	8.37938	8.33673	-2.4527	-0.33009	-1.25709
ILMN_1726516	SCRIB	scribbled homolog (Drosophila) (SCRIB), transcript variant 2	CRIB1; SCRB1; Vartul; SCRIB1	NM_015356.3	23513	8.43962	8.42962	8.56033	8.15127	8.23506	8.05474	-2.10372	-0.329502	-1.25658
ILMN_1793950	P704P	PREDICTED: prostate-specific P704P (P704P)		XM_926231.1	641455	9.16692	9.02956	8.90989	8.56071	8.87067	8.6865	-1.59647	-0.329495	-1.25657
ILMN_3290380	LOC387703	PREDICTED: misc_RNA (LOC387703), miscRNA.		XR_016730.2	387703	9.08375	8.98128	8.98982	8.57403	8.85362	8.64024	-1.82541	-0.328985	-1.25613
ILMN_2225318	SMS	spermine synthase (SMS)	SpS; SPMSY; MRSR; SRS	NM_004595.2	6611	9.84204	9.91019	9.76388	9.5214	9.47857	9.52924	-2.4401	-0.328966	-1.25611
ILMN_1683441	NCAPD3	non-SMC condensin II complex, subunit D3 (NCAPD3)	CAP-D3; MGC104671; FLJ42888; hHCP-6; hcp-6; hCAP-D3; KIAA0056	NM_015261.2	23310	6.26115	6.23649	6.3505	5.98868	6.04221	5.83036	-2.02907	-0.328966	-1.25611
ILMN_1745049	UQCR	ubiquinol-cytochrome c reductase, 6.4kDa subunit (UQCR)	0710008D09Rik	NM_006830.2	10975	6.89482	6.83162	6.87036	6.54844	6.44294	6.61912	-2.28152	-0.328769	-1.25594
ILMN_2378708	TAF6	TAF6 RNA polymerase II, TATA box binding protein (TBP)-associated factor, 80kDa (TAF6), transcript variant 1	MGC:8964; DKFZp781E21155; TAF2E; TAFII80; TAFII85; TAFII70	NM_005641.2	6878	6.40769	6.39917	6.1819	5.96116	6.12722	5.91409	-1.74986	-0.328765	-1.25594
ILMN_1808508	KITLG	KIT ligand (KITLG), transcript variant b	DKFZp686F2250; SCF; SF; MGF; KL-1; Kitl	NM_000899.3	4254	6.06178	6.16189	6.2854	5.93074	5.74416	5.848	-1.88982	-0.328724	-1.2559
ILMN_2181445	BCL2L13	BCL2-like 13 (apoptosis facilitator) (BCL2L13), nuclear gene encoding mitochondrial protein	BCL-RAMBO; MIL1	NM_015367.2	23786	10.3457	10.236	10.2733	9.83178	10.0658	9.97154	-1.99255	-0.328645	-1.25583
ILMN_1761456	ALG13	asparagine-linked glycosylation 13 homolog (S. cerevisiae) (ALG13)	YGL047W; GLT28D1; MDS031; CXorf45	NM_018466.3	79868	9.29875	9.06474	9.09619	8.66178	8.97814	8.8351	-1.5861	-0.32822	-1.25546
ILMN_2319588	OSGIN1	oxidative stress induced growth inhibitor 1 (OSGIN1), transcript variant 2	OKL38; BDGI	NM_182980.2	29948	5.49185	5.45615	5.63807	5.36107	5.04876	5.19377	-1.67325	-0.327493	-1.25483
ILMN_1756767	EIF5B	eukaryotic translation initiation factor 5B (EIF5B)	KIAA0741; FLJ10524; IF2; DKFZp434I036	NM_015904.3	9669	8.35711	8.37417	8.1467	7.94953	8.05039	7.89785	-1.86195	-0.326735	-1.25417
ILMN_2316173	AP1S1	adaptor-related protein complex 1, sigma 1 subunit (AP1S1), transcript variant 1	SIGMA1A; CLAPS1; AP19	NM_001283.2	1174	9.2555	9.02431	9.16315	8.76653	8.85891	8.83731	-2.01119	-0.326734	-1.25417
ILMN_1713966	MRPL52	mitochondrial ribosomal protein L52 (MRPL52), nuclear gene encoding mitochondrial protein, transcript variant 2		NM_180981.1	122704	9.02791	8.90298	8.94046	8.6359	8.67278	8.58346	-2.41976	-0.326402	-1.25388
ILMN_1811489	OXSR1	oxidative-stress responsive 1 (OXSR1)	OSR1; KIAA1101	NM_005109.2	9943	9.63463	9.63517	9.61802	9.30538	9.33718	9.26632	-2.94091	-0.326317	-1.25381
ILMN_1681543	RHBDD1	rhomboid domain containing 1 (RHBDD1)	DKFZp547E052; MGC117258	NM_032276.2	84236	6.98868	6.89482	6.83162	6.55459	6.53761	6.6453	-2.22792	-0.325878	-1.25343
ILMN_1652445	RAC1	ras-related C3 botulinum toxin substrate 1 (rho family, small GTP binding protein Rac1) (RAC1), transcript variant Rac1b	MGC111543; MIG5; TC-25; p21-Rac1	NM_018890.2	5879	6.72928	6.67525	6.732	6.32193	6.59096	6.24603	-1.66283	-0.325871	-1.25342
ILMN_1696099	ALDH4A1	aldehyde dehydrogenase 4 family, member A1 (ALDH4A1), nuclear gene encoding mitochondrial protein, transcript variant P5CDhL	P5CDh; P5CD; ALDH4; P5CDhL; P5CDhS	NM_003748.2	8659	6.00225	5.81762	5.83794	5.56071	5.48543	5.63517	-2.00422	-0.325501	-1.2531
ILMN_1678032	NR1H2	nuclear receptor subfamily 1, group H, member 2 (NR1H2)	NER; LXR-b; UNR; RIP15; NER-I; LXRB	NM_007121.2	7376	8.15026	8.06286	7.79312	7.5812	7.77545	7.67313	-1.54293	-0.325483	-1.25308
ILMN_1809496	COPG2	coatomer protein complex, subunit gamma 2 (COPG2)	FLJ11781; 2-COP	NM_012133.2	26958	7.73742	7.56453	7.44626	7.20359	7.15886	7.40939	-1.59414	-0.325452	-1.25306
ILMN_1724941	CDCP1	CUB domain containing protein 1 (CDCP1), transcript variant 1	SIMA135; TRASK; CD318	NM_022842.3	64866	9.25006	9.114	9.23984	8.88844	8.90659	8.83257	-2.34463	-0.325433	-1.25304
ILMN_1661428	ATP11C	ATPase, class VI, type 11C (ATP11C), transcript variant 1	ATPIQ; ATPIG	NM_173694.3	286410	6.2211	6.55152	6.43962	6.05311	6.18982	5.99322	-1.60405	-0.325362	-1.25298
ILMN_2096012	UHMK1	U2AF homology motif (UHM) kinase 1 (UHMK1)	Kist; KIS	NM_175866.2	127933	6.98641	6.86171	7.17093	6.71836	6.64818	6.67666	-1.78913	-0.325281	-1.25291
ILMN_3250209	CTBP2	C-terminal binding protein 2 (CTBP2), transcript variant 1		NM_001329.2	1488	7.38198	7.1918	7.20065	7.04002	6.80607	6.95303	-1.78718	-0.325105	-1.25276
ILMN_1712405	LOC642468	PREDICTED: hypothetical protein LOC642467, transcript variant 2 (LOC642468)		XM_931123.1	642468	6.10014	5.83794	5.77873	5.52042	5.66391	5.55766	-1.64597	-0.324941	-1.25261
ILMN_1674650	C9orf95	chromosome 9 open reading frame 95 (C9orf95)	NRK1; bA235O14.2; RP11-235O14.2; FLJ20559	NM_017881.1	54981	7.63952	7.6489	7.75422	7.30104	7.46271	7.30469	-2.10248	-0.324733	-1.25243
ILMN_1699545	PCSK7	proprotein convertase subtilisin/kexin type 7 (PCSK7)	SPC7; PC8; LPC; PC7	NM_004716.2	9159	8.71939	8.62169	8.55842	8.40854	8.30652	8.21043	-1.98422	-0.324669	-1.25238
ILMN_1681724	FPGS	folylpolyglutamate synthase (FPGS), nuclear gene encoding mitochondrial protein, transcript variant 2		NM_001018078.1	2356	5.89966	5.96809	5.83289	5.40939	5.55459	5.76288	-1.62731	-0.324593	-1.25231
ILMN_3185092	LOC100128760	PREDICTED: misc_RNA (LOC100128760), miscRNA.		XR_037264.1	100128760	6.74416	6.65249	6.78921	6.29829	6.5744	6.33985	-1.75744	-0.324436	-1.25218
ILMN_1751171	IRF2BP1	interferon regulatory factor 2 binding protein 1 (IRF2BP1)	DKFZP434M154	NM_015649.1	26145	6.3837	6.05528	6.19574	5.79181	5.97269	5.89724	-1.63515	-0.324327	-1.25208
ILMN_1709483	MRE11A	MRE11 meiotic recombination 11 homolog A (S. cerevisiae) (MRE11A), transcript variant 1	MRE11B; MRE11; ATLD; HNGS1	NM_005591.3	4361	6.36457	6.19771	6.24982	5.90929	6.1127	5.81762	-1.70731	-0.324163	-1.25194
ILMN_3251592	C9orf140	chromosome 9 open reading frame 140 (C9orf140)		NM_178448.3	89958	5.52356	5.46271	5.35755	5.19377	5.0917	5.08746	-2.16672	-0.323629	-1.25147
ILMN_1775823	POFUT2	protein O-fucosyltransferase 2 (POFUT2), transcript variant 3	C21orf80; FUT13	NM_133635.4	23275	9.8505	9.76703	9.82925	9.49185	9.5708	9.41342	-2.28527	-0.323566	-1.25142
ILMN_2361807	OS9	amplified in osteosarcoma (OS9), transcript variant 1		NM_006812.2	10956	7.07361	6.80349	6.75889	6.50303	6.61029	6.55305	-1.67642	-0.323203	-1.25111
ILMN_2408576	FAM129B	family with sequence similarity 129, member B (FAM129B), transcript variant 2	OC58; MEG-3; FLJ13518; FLJ22298; RP11-356B19.6; bA356B19.6; FLJ22151; DKFZP434H0820; C9orf88	NM_001035534.1	64855	10.006	9.79718	9.78856	9.54361	9.60159	9.47756	-1.90758	-0.323008	-1.25094
ILMN_1664516	CENPF	centromere protein F, 350/400ka (mitosin) (CENPF)	PRO1779; hcp-1; CENF	NM_016343.3	1063	6.69209	6.67948	6.67807	6.41447	6.25361	6.41278	-2.25452	-0.322926	-1.25086
ILMN_1839019		mRNA; cDNA DKFZp779O0231 (from clone DKFZp779O0231)			NA	9.03012	8.89026	8.88844	8.63807	8.57592	8.62644	-2.29974	-0.322796	-1.25075
ILMN_1724017	LOC732450	PREDICTED: similar to protein immuno-reactive with anti-PTH polyclonal antibodies (LOC732450)		XM_001133884.1	732450	6.47573	6.47249	6.32193	6.24222	5.94486	6.11478	-1.70168	-0.322762	-1.25072
ILMN_1859701		QV0-BN0041-070300-147-c07 BN0041 cDNA, mRNA sequence			NA	5.69766	5.67243	5.87036	5.34341	5.34696	5.58195	-1.69668	-0.322711	-1.25068
ILMN_1811472	KIF23	kinesin family member 23 (KIF23), transcript variant 2	MKLP-1; CHO1; KNSL5; MKLP1	NM_004856.4	9493	7.20945	7.3147	7.33002	6.87652	6.98755	7.02237	-2.18314	-0.322579	-1.25056
ILMN_1756982	CLIC1	chloride intracellular channel 1 (CLIC1)	NCC27; G6	NM_001288.4	1192	11.8774	11.8068	11.8307	11.3394	11.6208	11.587	-1.7838	-0.322526	-1.25052
ILMN_2311041	MRPL52	mitochondrial ribosomal protein L52 (MRPL52), nuclear gene encoding mitochondrial protein, transcript variant 6		NM_181306.1	122704	8.74719	8.73775	8.83257	8.31606	8.53722	8.49705	-1.96444	-0.322396	-1.25041
ILMN_1697652	PLEKHB2	pleckstrin homology domain containing, family B (evectins) member 2 (PLEKHB2), transcript variant 2	EVT2; FLJ20783	NM_017958.1	55041	7.54844	7.40003	7.33181	6.98641	7.16088	7.16591	-1.82408	-0.322357	-1.25037
ILMN_1673998	SSTR1	somatostatin receptor 1 (SSTR1)	SRIF-2	NM_001049.2	6751	5.44626	5.52669	5.49185	4.97269	5.22497	5.30012	-1.68383	-0.32234	-1.25036
ILMN_2377459	PSCD2	pleckstrin homology, Sec7 and coiled-coil domains 2 (cytohesin-2) (PSCD2), transcript variant 2	CTS18; PSCD2L; Sec7p-L; ARNO; CTS18.1; SEC7L; Sec7p-like	NM_004228.4	9266	7.34518	7.32283	7.31379	7.01458	7.06824	6.9331	-2.47497	-0.321961	-1.25003
ILMN_1688953	ARHGAP19	Rho GTPase activating protein 19 (ARHGAP19)	MGC138804; MGC138805; MGC14258; DKFZp313K217	NM_032900.4	84986	6.49825	6.38888	6.30925	5.99548	6.12928	6.10643	-2.03202	-0.321726	-1.24983
ILMN_1746368	SELT	selenoprotein T (SELT)		NM_016275.3	51714	10.3429	10.492	10.5269	10.0764	10.1576	10.1631	-2.10526	-0.321512	-1.24964
ILMN_1654289	ELK1	ELK1, member of ETS oncogene family (ELK1)		NM_005229.2	2002	8.70009	8.59694	8.73166	8.35138	8.34607	8.36676	-2.45679	-0.321492	-1.24962
ILMN_1699574	NRP1	neuropilin 1 (NRP1), transcript variant 1	DKFZp781F1414; VEGF165R; NRP; DKFZp686A03134; CD304	NM_003873.4	8829	9.92615	9.89072	9.81266	9.41003	9.58477	9.67101	-1.85175	-0.321238	-1.2494
ILMN_3243924	P2RX6	purinergic receptor P2X, ligand-gated ion channel, 6 (P2RX6), transcript variant 1	P2RX6; P2XM; MGC129625; P2X6	NM_005446.3	9127	5.83036	6.0268	6.02237	5.76818	5.45286	5.69488	-1.56758	-0.3212	-1.24937
ILMN_2099301	UNC84B	unc-84 homolog B (C. elegans) (UNC84B)	KIAA0668; MGC133055; SUN2; MGC133056	NM_015374.1	25777	11.266	11.2174	11.1952	10.6831	11.0332	10.9994	-1.57967	-0.320924	-1.24913
ILMN_2342695	PDGFA	platelet-derived growth factor alpha polypeptide (PDGFA), transcript variant 2	PDGF-A; PDGF1	NM_033023.3	5154	6.2075	6.29094	6.20163	5.80993	6.10014	5.82782	-1.70662	-0.320731	-1.24896
ILMN_1813120	MAP4K3	mitogen-activated protein kinase kinase kinase kinase 3 (MAP4K3)	RAB8IPL1; MAPKKKK3; GLK	NM_003618.2	8491	7.09592	6.91409	6.94369	6.51412	6.66249	6.81506	-1.65938	-0.320674	-1.24891
ILMN_1804812	ANAPC1	anaphase promoting complex subunit 1 (ANAPC1)	TSG24; MCPR; APC1	NM_022662.2	64682	7.76222	7.87467	7.82273	7.48543	7.52121	7.49105	-2.58482	-0.320645	-1.24889
ILMN_1897911		UI-H-BI3-alw-d-07-0-UI.s1 NCI_CGAP_Sub5 cDNA clone IMAGE:3068964 3, mRNA sequence			NA	6.2384	6.06609	6.12309	5.6865	5.91169	5.8679	-1.8286	-0.320497	-1.24876
ILMN_3260783	DKFZP779L1853	PREDICTED: misc_RNA (DKFZP779L1853), miscRNA.		XR_041775.1	643162	5.57592	5.57289	5.63227	5.1375	5.48864	5.19377	-1.59958	-0.320385	-1.24866
ILMN_1680134	CARM1	coactivator-associated arginine methyltransferase 1 (CARM1)	PRMT4	NM_199141.1	10498	10.0193	9.84925	9.84471	9.63554	9.6954	9.42122	-1.67868	-0.320368	-1.24865
ILMN_1663605	RNF123	ring finger protein 123 (RNF123)	KPC1; DKFZp686C2222; FP1477; FLJ12565; MGC163504	NM_022064.2	63891	7.93782	7.91409	7.82591	7.73064	7.46434	7.52199	-1.80472	-0.32028	-1.24857
ILMN_1713147	MCRS1	microspherule protein 1 (MCRS1), transcript variant 1	ICP22BP; P78; MSP58; MCRS2	NM_006337.3	10445	6.27612	6.21917	6.12102	5.80993	5.96116	5.88509	-2.097	-0.320044	-1.24837
ILMN_1669781	PRLR	prolactin receptor (PRLR)	hPRLrI	NM_000949.2	5618	6.26115	6.17592	6.29646	5.91409	5.88753	5.97269	-2.39608	-0.319744	-1.24811
ILMN_1773228	DLST	dihydrolipoamide S-succinyltransferase (E2 component of 2-oxo-glutarate complex) (DLST)	DLTS	NM_001933.3	1743	8.43254	8.30515	8.28864	7.98014	8.13597	7.95128	-1.9622	-0.319646	-1.24802
ILMN_1775566	ATP1A1	ATPase, Na+/K+ transporting, alpha 1 polypeptide (ATP1A1), transcript variant 1	MGC3285; MGC51750	NM_000701.6	476	9.04576	8.99492	9.11998	8.62607	8.86511	8.71149	-1.89502	-0.319325	-1.24775
ILMN_1862684		AGENCOURT_7256933 NIH_MGC_68 cDNA clone IMAGE:5773707 5, mRNA sequence			NA	6.2075	6.35226	6.46597	5.98413	5.9472	6.1375	-1.72867	-0.318968	-1.24744
ILMN_1773751	HRAS	v-Ha-ras Harvey rat sarcoma viral oncogene homolog (HRAS), transcript variant 1	c-bas/has; RASH1; K-ras; N-ras; CTLO; HRAS1	NM_005343.2	3265	8.88966	9.06124	8.92333	8.81089	8.58946	8.51728	-1.65677	-0.318862	-1.24735
ILMN_1764826	TFE3	transcription factor binding to IGHM enhancer 3 (TFE3)	RCCP2; TFEA	NM_006521.3	7030	7.48945	7.49265	7.56453	7.34696	7.17293	7.07039	-1.83137	-0.318786	-1.24728
ILMN_2378696	GFM2	G elongation factor, mitochondrial 2 (GFM2), nuclear gene encoding mitochondrial protein, transcript variant 3	hEFG2; EFG2; MST027	NM_170681.1	84340	6.01569	6.01346	6.16792	5.69766	5.88509	5.65821	-1.80701	-0.318705	-1.24721
ILMN_1763638	BCAR3	breast cancer anti-estrogen resistance 3 (BCAR3)	NSP2; KIAA0554; SH2D3B	NM_003567.2	8412	9.45533	9.53352	9.47513	9.14057	9.21237	9.15558	-2.61508	-0.318484	-1.24702
ILMN_1736441	PDXP	pyridoxal (pyridoxine, vitamin B6) phosphatase (PDXP)	CIN; FLJ32703; PLP; dJ37E16.5	NM_020315.4	57026	9.75956	9.6954	9.71149	9.27984	9.56758	9.36392	-1.79594	-0.318373	-1.24692
ILMN_3293182	LOC652904	PREDICTED: similar to Cks1 protein homologue (LOC652904)		XM_942635.2	652904	5.64962	5.65821	5.78136	5.26679	5.48543	5.38198	-1.91935	-0.318333	-1.24689
ILMN_1759232	IRS1	insulin receptor substrate 1 (IRS1)	HIRS-1	NM_005544.1	3667	8.15482	8.05039	8.05637	7.66888	7.83542	7.80284	-2.1085	-0.318145	-1.24673
ILMN_1711314	NUDT5	nudix (nucleoside diphosphate linked moiety X)-type motif 5 (NUDT5)	hYSAH1; YSA1H	NM_014142.2	11164	9.96506	9.82845	9.83573	9.6879	9.4735	9.51412	-1.88078	-0.317909	-1.24652
ILMN_1815303	LOC642197	PREDICTED: similar to Protein FAM82B (LOC642197)		XM_936354.2	642197	8.18488	8.50779	8.52317	8.11894	8.14211	8.00113	-1.52595	-0.317888	-1.2465
ILMN_2398847	ARHGAP17	Rho GTPase activating protein 17 (ARHGAP17), transcript variant 2	FLJ37567; MSTP110; DKFZp564A1363; MSTP066; RICH1; MST066; FLJ43368; MGC87805; MSTP038; WBP15; NADRIN; MST110	NM_018054.4	55114	6.95536	6.81634	6.85175	6.45121	6.62205	6.59694	-2.01935	-0.317751	-1.24639
ILMN_1682919	PAFAH2	platelet-activating factor acetylhydrolase 2, 40kDa (PAFAH2)	HSD-PLA2; FLJ26025	NM_000437.3	5051	6.41447	6.2724	6.38716	6.12309	5.9472	6.05094	-2.02562	-0.317601	-1.24626
ILMN_1773847	DYNC1I2	dynein, cytoplasmic 1, intermediate chain 2 (DYNC1I2)	DNCI2; MGC104199; MGC111094; MGC9324; IC2; FLJ90842; FLJ21089	NM_001378.1	1781	10.1063	10.124	10.02	9.6215	9.88035	9.79636	-1.84042	-0.317362	-1.24605
ILMN_1805725	B4GALNT1	beta-1,4-N-acetyl-galactosaminyl transferase 1 (B4GALNT1)	GALGT; GALNACT	NM_001478.3	2583	6.39232	6.49185	6.49506	6.14364	6.21529	6.06824	-2.20495	-0.317352	-1.24604
ILMN_2317730	ELMO2	engulfment and cell motility 2 (ELMO2), transcript variant 1	FLJ11656; CED12; CED-12; KIAA1834; ELMO-2	NM_133171.2	63916	8.36107	8.29278	8.20359	7.97671	7.98185	7.9472	-2.32298	-0.317227	-1.24593
ILMN_1763540	PSME4	proteasome (prosome, macropain) activator subunit 4 (PSME4)	FLJ21864; MGC142228; MGC138374; PA200; KIAA0077	NM_014614.1	23198	10.1546	10.1782	10.3571	9.83983	9.96275	9.93575	-1.93708	-0.317168	-1.24588
ILMN_2141790	HYOU1	hypoxia up-regulated 1 (HYOU1)	DKFZp686N08236; ORP150	NM_006389.2	10525	7.46761	7.38284	7.40088	6.96463	7.0864	7.24888	-1.80209	-0.317139	-1.24586
ILMN_1815599	FOXE3	forkhead box E3 (FOXE3)	FREAC8; FKHL12; ASMD	NM_012186.2	2301	5.37851	5.29278	5.17792	4.82273	5.00899	5.06609	-1.72934	-0.317134	-1.24585
ILMN_1746206	AZI1	5-azacytidine induced 1 (AZI1), transcript variant 1	AZ1; Cep131	NM_014984.2	22994	7.17293	7.19279	7.23554	6.76686	7.01569	6.8679	-1.92916	-0.316933	-1.24568
ILMN_1713249	PHF19	PHD finger protein 19 (PHF19), transcript variant 1	MGC131698; PCL3; MGC23929; MGC149713; MGC149712	NM_015651.1	26147	6.91289	6.98982	7.04439	6.63081	6.82018	6.54535	-1.76632	-0.31692	-1.24567
ILMN_3244286	TANC2	tetratricopeptide repeat, ankyrin repeat and coiled-coil containing 2 (TANC2)	FLJ11824; KIAA1636; DKFZP564D166; rols; KIAA1148; ROLSA; FLJ10215	NM_025185.3	26115	7.24413	7.27426	7.15482	6.6907	7.0433	6.98868	-1.54557	-0.316841	-1.2456
ILMN_1695576	MRPL24	mitochondrial ribosomal protein L24 (MRPL24), nuclear gene encoding mitochondrial protein, transcript variant 1	FLJ20917; MRP-L18; MGC22737; MGC9831	NM_145729.1	79590	9.43024	9.52709	9.48402	9.13802	9.17642	9.17642	-2.62912	-0.316829	-1.24559
ILMN_2330845	NSF	N-ethylmaleimide-sensitive factor (NSF)	SKD2	NM_006178.1	4905	8.15684	8.19229	8.06824	7.67807	7.94837	7.84109	-1.7937	-0.316615	-1.2454
ILMN_1799103	SNRPB	small nuclear ribonucleoprotein polypeptides B and B1 (SNRPB), transcript variant 2	snRNP-B; COD; SNRPB1; SmB/SmB	NM_003091.3	6628	10.5954	10.523	10.3992	10.1742	10.2796	10.1145	-1.92209	-0.316426	-1.24524
ILMN_1713006	CDC34	cell division cycle 34 homolog (S. cerevisiae) (CDC34)	UBE2R1; UBC3; E2-CDC34	NM_004359.1	997	8.12877	8.14924	8.10329	7.76818	7.87036	7.79377	-2.56843	-0.316327	-1.24516
ILMN_1732776	NUP98	nucleoporin 98kDa (NUP98), transcript variant 1	NUP196; ADIR2	NM_016320.3	4928	5.80993	5.82273	5.86047	5.43962	5.47573	5.62936	-2.1101	-0.316137	-1.24499
ILMN_2064898	CCDC56	coiled-coil domain containing 56 (CCDC56)	HSPC009	NM_001040431.1	28958	9.42962	9.47431	9.60789	9.1127	9.24246	9.20848	-2.02776	-0.316059	-1.24493
ILMN_1772719	GPN1	GPN-loop GTPase 1 (GPN1)	MBDIN; ATPBD1A; NTPBP	NM_007266.2	11321	9.34518	9.20408	9.19402	8.85643	9.06286	8.8759	-1.84135	-0.316033	-1.2449
ILMN_1678252	HDLBP	high density lipoprotein binding protein (HDLBP), transcript variant 1	HBP; VGL; FLJ16432; PRO2900	NM_005336.3	3069	5.77873	5.56071	5.69209	5.20945	5.33271	5.54226	-1.53482	-0.315707	-1.24462
ILMN_1728887	PAK4	p21 protein (Cdc42/Rac)-activated kinase 4 (PAK4), transcript variant 3		NM_001014832.1	10298	8.28401	8.1819	8.15735	7.93487	7.97842	7.76288	-1.90076	-0.315695	-1.24461
ILMN_1757555	LOC283767	PREDICTED: FLJ40198 protein (LOC283767)		XM_497437.2	283767	5.66107	5.46923	5.75489	5.31107	5.35755	5.27053	-1.7771	-0.315347	-1.24431
ILMN_2397571	PIGC	phosphatidylinositol glycan anchor biosynthesis, class C (PIGC), transcript variant 1	GPI2; MGC2049	NM_153747.1	5279	6.20163	6.45286	6.42459	5.91648	6.10643	6.11061	-1.64377	-0.315186	-1.24417
ILMN_1703692	LOC647000	PREDICTED: similar to tubulin, beta 5 (LOC647000)		XM_929980.2	647000	10.9049	10.807	10.6366	10.398	10.468	10.5371	-1.77267	-0.315129	-1.24412
ILMN_1789018	ILF3	interleukin enhancer binding factor 3, 90kDa (ILF3), transcript variant 1	NF-AT-90; NFAR-1; NFAR; MPHOSPH4; TCP80; MMP4; DRBF; NF90; MPP4; DRBP76	NM_012218.2	3609	6	5.84549	5.76022	5.44626	5.59991	5.61471	-1.76771	-0.314944	-1.24396
ILMN_2197101	DDX19A	DEAD (Asp-Glu-Ala-As) box polypeptide 19A (DDX19A)	DDX19L; FLJ11126; DDX19-DDX19L; DKFZp686C21137	NM_018332.3	55308	7.84862	7.76951	7.93958	7.51175	7.63227	7.46923	-1.98027	-0.314818	-1.24385
ILMN_1792978	HAS2	hyaluronan synthase 2 (HAS2)	MGC126241; MGC126242	NM_005328.1	3037	6.90569	7.11582	6.97269	6.63227	6.7879	6.63081	-1.84202	-0.314407	-1.2435
ILMN_1867439		mRNA; cDNA DKFZp667C1617 (from clone DKFZp667C1617)			NA	6.07253	5.92837	5.79442	5.64962	5.66959	5.53294	-1.74064	-0.31439	-1.24349
ILMN_1676663	TNFRSF11B	tumor necrosis factor receptor superfamily, member 11b (TNFRSF11B)	MGC29565; OCIF; OPG; TR1	NM_002546.3	4982	10.0489	10.1443	10.3283	9.73894	9.84408	9.99577	-1.56702	-0.314243	-1.24336
ILMN_1800008	ACAT1	acetyl-Coenzyme A acetyltransferase 1 (ACAT1), nuclear gene encoding mitochondrial protein	MAT; ACAT; THIL; T2	NM_000019.2	38	10.1001	10.1202	10.0583	9.6893	9.83983	9.808	-2.25756	-0.313835	-1.24301
ILMN_1676361	ARHGAP22	Rho GTPase activating protein 22 (ARHGAP22)	RhoGAP2	NM_021226.2	58504	8.59171	8.70805	8.83415	8.43546	8.47533	8.28263	-1.73122	-0.313499	-1.24272
ILMN_1799614	PNPLA6	patatin-like phospholipase domain containing 6 (PNPLA6)	sws; NTE	NM_006702.3	10908	8.75288	8.75756	8.76752	8.51136	8.56986	8.25692	-1.68552	-0.313277	-1.24253
ILMN_2405129	ARHGEF1	Rho guanine nucleotide exchange factor (GEF) 1 (ARHGEF1), transcript variant 1	P115-RHOGEF; GEF1; LBCL2; SUB1.5	NM_199002.1	9138	6.87529	6.73471	6.6893	6.36107	6.54226	6.45615	-1.88335	-0.313275	-1.24252
ILMN_1703072	CREB3	cAMP responsive element binding protein 3 (CREB3)	LZIP; LUMAN; MGC15333; MGC19782	NM_006368.4	10488	6.74953	6.97613	6.8679	6.67525	6.53761	6.44128	-1.70186	-0.313141	-1.24241
ILMN_1675844	WDR1	WD repeat domain 1 (WDR1), transcript variant 1	NORI-1; AIP1	NM_017491.3	9948	9.05907	8.94866	8.96145	8.49785	8.85175	8.68018	-1.58411	-0.313133	-1.2424
ILMN_3247059	HYALP1	hyaluronoglucosaminidase pseudogene 1 (HYALP1), non-coding RNA.		NR_002731.1	26062	6.2211	6.16189	6.09803	5.8505	5.6893	6.00225	-1.67554	-0.312991	-1.24228
ILMN_1701869	FBXO22	F-box protein 22 (FBXO22), transcript variant 1	MGC31799; FBX22; FLJ13986	NM_147188.1	26263	6.06824	6.04658	5.97039	5.62059	5.75221	5.77347	-2.144	-0.312981	-1.24227
ILMN_1690802	TRMT112	tRNA methyltransferase 11-2 homolog (S. cerevisiae) (TRMT112)		NM_016404.1	51504	11.0802	10.8922	11.0296	10.5388	10.6426	10.882	-1.52038	-0.3129	-1.2422
ILMN_1693124	SDHAF1	succinate dehydrogenase complex assembly factor 1 (SDHAF1)		NM_001042631.1	644096	5.91886	5.79961	5.91648	5.52042	5.57894	5.59694	-2.31175	-0.312883	-1.24219
ILMN_1723843	CSNK2A2	casein kinase 2, alpha prime polypeptide (CSNK2A2)	CK2A2; CSNK2A1; FLJ43934	NM_001896.2	1459	8.6014	8.46679	8.45738	8.28494	8.28077	8.02126	-1.65937	-0.312867	-1.24217
ILMN_1780291	NFAT5	nuclear factor of activated T-cells 5, tonicity-responsive (NFAT5), transcript variant 2	NFATL1; OREBP; TONEBP; NF-AT5; KIAA0827; NFATZ	NM_138713.2	10725	5.70044	5.64962	5.67243	5.1375	5.4822	5.46597	-1.53858	-0.312267	-1.24166
ILMN_2414826	VPS13A	vacuolar protein sorting 13 homolog A (S. cerevisiae) (VPS13A), transcript variant A	KIAA0986; CHAC; FLJ42030	NM_033305.2	23230	6.69488	6.56071	6.60881	6.35403	6.26866	6.30743	-2.2888	-0.311429	-1.24094
ILMN_1690965	DHX9	DEAH (Asp-Glu-Ala-His) box polypeptide 9 (DHX9), transcript variant 1	NDH II; LKP; NDHII; DDX9; RHA	NM_001357.2	1660	6.8125	6.83668	6.8125	6.5345	6.51728	6.47573	-2.85885	-0.31139	-1.2409
ILMN_3241034	SNORD3C	small nucleolar RNA, C/D box 3C (SNORD3C), small nucleolar RNA.	U3-3	NR_006881.1	780853	5.926	5.85549	6.01569	5.54535	5.58195	5.73606	-1.89458	-0.311272	-1.2408
ILMN_3244348	SNORA18	small nucleolar RNA, H/ACA box 18 (SNORA18), small nucleolar RNA.	ACA18	NR_002959.1	677805	7.39832	7.46516	7.45286	7.05202	7.10119	7.23074	-2.11668	-0.310793	-1.24039
ILMN_1696827	PARS2	prolyl-tRNA synthetase 2, mitochondrial (putative) (PARS2), nuclear gene encoding mitochondrial protein	MGC19467; MGC14416; DKFZp727A071	NM_152268.2	25973	5.926	5.87036	5.80993	5.58496	5.51096	5.57894	-2.37418	-0.310477	-1.24012
ILMN_1795778	P4HA2	prolyl 4-hydroxylase, alpha polypeptide II (P4HA2), transcript variant 2	4-PH alpha 2	NM_001017973.1	8974	10.6542	10.7524	10.5171	10.2032	10.3815	10.4076	-1.69254	-0.310431	-1.24008
ILMN_1656218	LOC388022	hypothetical gene supported by AK131040 (LOC388022)		NM_001013637.1	388022	5.84046	5.53916	5.52042	5.23649	5.38543	5.34696	-1.53198	-0.310388	-1.24004
ILMN_1742089	NLN	neurolysin (metallopeptidase M3 family) (NLN)	KIAA1226; DKFZp564F123; AGTBP	NM_020726.3	57486	6.01569	6.12722	6.12309	5.68089	5.8679	5.7866	-2.00128	-0.310207	-1.23989
ILMN_1683827	VPS24	vacuolar protein sorting 24 homolog (S. cerevisiae) (VPS24), transcript variant 2	CGI-149; CHMP3; NEDF	NM_001005753.1	51652	8.61618	8.55957	8.57251	8.08108	8.45204	8.28586	-1.56173	-0.309759	-1.2395
ILMN_1667831	HOXB6	homeobox B6 (HOXB6)	Hox-2.2; HOX2B; HOX2; HU-2	NM_018952.4	3216	5.62644	5.72247	5.59694	5.3147	5.40939	5.29278	-2.18335	-0.309657	-1.23941
ILMN_2347068	MKNK2	MAP kinase interacting serine/threonine kinase 2 (MKNK2), transcript variant 1	GPRK7; MNK2	NM_017572.2	2872	9.77841	10.0193	10.0441	9.73522	9.65678	9.5214	-1.58729	-0.309478	-1.23926
ILMN_1714567	AHNAK	AHNAK nucleoprotein (AHNAK), transcript variant 1	MGC5395; AHNAKRS	NM_001620.1	79026	10.2759	10.3722	10.3832	10.1611	9.96708	9.97484	-1.9133	-0.309403	-1.23919
ILMN_1700975	ENSA	endosulfine alpha (ENSA), transcript variant 8	MGC4319; MGC78563; MGC8394	NM_207168.1	2029	5.70874	5.70044	5.89966	5.35403	5.63807	5.38888	-1.54401	-0.309286	-1.23909
ILMN_2075927	STK40	serine/threonine kinase 40 (STK40)	SgK495; SHIK; RP11-268J15.4; MGC4796	NM_032017.1	83931	8.23793	8.22786	8.10591	8.06932	7.81954	7.75556	-1.5899	-0.309094	-1.23893
ILMN_1714216	TSC2	tuberous sclerosis 2 (TSC2), transcript variant 4	TSC4; FLJ43106; LAM	NM_001077183.1	7249	6.80735	6.71562	6.78529	6.56224	6.49025	6.32912	-1.88387	-0.308883	-1.23875
ILMN_1819805		UI-H-FG0-bcw-h-18-0-UI.s1 NCI_CGAP_EN1_2 cDNA clone UI-H-FG0-bcw-h-18-0-UI 3, mRNA sequence			NA	6.26679	6.23074	6.10434	5.99322	5.93546	5.74685	-1.72573	-0.308778	-1.23866
ILMN_1660111	UCHL3	ubiquitin carboxyl-terminal esterase L3 (ubiquitin thiolesterase) (UCHL3)	UCH-L3	NM_006002.3	7347	9.451	9.52199	9.56262	9.25904	9.13597	9.21432	-2.23321	-0.308767	-1.23865
ILMN_3291709	LOC402175	PREDICTED: misc_RNA (LOC402175), miscRNA.		XR_038253.1	402175	11.1761	11.1072	11.1578	10.6448	10.9364	10.9338	-1.6363	-0.308671	-1.23857
ILMN_1681837	POLR3A	polymerase (RNA) III (DNA directed) polypeptide A, 155kDa (POLR3A)	RPC155; hRPC155; RPC1	NM_007055.2	11128	7.71973	7.56605	7.87529	7.42459	7.44294	7.36807	-1.6971	-0.308491	-1.23841
ILMN_1714170	SPSB1	splA/ryanodine receptor domain and SOCS box containing 1 (SPSB1)	SSB1; SSB-1	NM_025106.2	80176	7.79896	7.74953	7.79377	7.48059	7.43962	7.49745	-2.72836	-0.308198	-1.23816
ILMN_1768558	LOC727848	PREDICTED: similar to actin-like protein (LOC727848)		XM_001125941.1	727848	7.85549	7.92778	7.83036	7.51806	7.6907	7.4814	-1.91747	-0.307824	-1.23784
ILMN_1683243	VPS45	vacuolar protein sorting 45 homolog (S. cerevisiae) (VPS45)	VPS45B; H1; H1VPS45; VSP45; VPS45A; VSP45A; VPS54A	NM_007259.3	11311	7.40854	7.41193	7.32103	6.99548	7.12516	7.09803	-2.21064	-0.30761	-1.23766
ILMN_1652826	LRRC17	leucine rich repeat containing 17 (LRRC17), transcript variant 2	P37NB	NM_005824.1	10234	8.18438	8.3345	8.30378	8.02901	7.88387	7.98698	-2.01571	-0.3076	-1.23765
ILMN_1726666	GPX3	glutathione peroxidase 3 (plasma) (GPX3)	GSHPx-P; GSHPx-3; GPx-P	NM_002084.3	2878	8.57705	8.47614	8.37851	8.19377	8.18041	8.13494	-2.05394	-0.307528	-1.23759
ILMN_1849218		BX451947 FETAL BRAIN cDNA clone CS0DF008YL16 5-PRIME, mRNA sequence			NA	5.71425	5.65535	5.72792	5.27053	5.55459	5.3505	-1.7346	-0.307301	-1.23739
ILMN_3198247	LOC388707	PREDICTED: misc_RNA (LOC388707), miscRNA.		XR_017679.2	388707	11.4634	11.36	11.3169	10.9457	11.1578	11.115	-1.83245	-0.307282	-1.23737
ILMN_2302118	CCDC50	coiled-coil domain containing 50 (CCDC50), transcript variant 1	C3orf6; DFNA44; YMER	NM_174908.2	152137	10.4064	10.4176	10.4884	10.1467	10.1202	10.124	-2.63274	-0.307192	-1.2373
ILMN_1767253	RRP12	ribosomal RNA processing 12 homolog (S. cerevisiae) (RRP12)	FLJ20231; KIAA0690; DKFZp762P1116	NM_015179.2	23223	6.95884	6.9542	6.96809	6.70736	6.63372	6.61912	-2.61661	-0.306976	-1.23711
ILMN_2210729	STYXL1	serine/threonine/tyrosine interacting-like 1 (STYXL1)	MK-STYX; DUSP24	NM_016086.2	51657	9.0337	9.04631	9.10303	8.6014	8.91019	8.75054	-1.69239	-0.306966	-1.2371
ILMN_1764769	VWA5A	von Willebrand factor A domain containing 5A (VWA5A), transcript variant 1	BCSC-1; BCSC1	NM_014622.4	4013	6.96694	7.20555	7.04002	6.8009	6.72928	6.76155	-1.87989	-0.306924	-1.23707
ILMN_1693669	WDR79	WD repeat domain 79 (WDR79)	WRAP53; FLJ10385	NM_018081.1	55135	6.37851	6.73335	6.59395	6.27798	6.30195	6.20555	-1.55793	-0.306777	-1.23694
ILMN_1752249	FAM38A	family with sequence similarity 38, member A (FAM38A)	Mib	NM_014745.1	9780	9.99577	9.78611	9.86388	9.55017	9.68387	9.49185	-1.77007	-0.306618	-1.23681
ILMN_1797009	F3	coagulation factor III (thromboplastin, tissue factor) (F3)	TF; TFA; CD142	NM_001993.2	2152	7.49025	7.55536	7.69349	7.19476	7.40088	7.22497	-1.72414	-0.306163	-1.23642
ILMN_2323302	SON	SON DNA binding protein (SON), transcript variant f	FLJ21099; SON3; KIAA1019; BASS1; NREBP; C21orf50; DBP-5; FLJ33914	NM_138927.1	6651	5.83794	6	5.9331	5.46923	5.78136	5.60288	-1.5962	-0.305855	-1.23615
ILMN_1768273	POP1	processing of precursor 1, ribonuclease P/MRP subunit (S. cerevisiae) (POP1)	KIAA0061; MGC17365	NM_015029.1	10940	7.0917	7.11061	7.11478	6.89724	6.77479	6.72792	-2.17312	-0.305716	-1.23603
ILMN_3240541	EML2	echinoderm microtubule associated protein like 2 (EML2)	EMAP2; EMAP-2; ELP70	NM_012155.1	24139	6.77742	6.76818	6.76022	6.50462	6.55152	6.33271	-1.95428	-0.30566	-1.23598
ILMN_3177271	LOC100129585	PREDICTED: similar to hCG2011544 (LOC100129585)		XM_001720509.1	100129585	8.08534	8.24888	8.11998	7.82464	7.8936	7.81954	-2.10818	-0.30547	-1.23582
ILMN_1757847	C11orf68	chromosome 11 open reading frame 68 (C11orf68)	P5326; Bles03	NM_031450.2	83638	7.80025	7.64746	7.68229	7.49825	7.40429	7.31107	-1.8994	-0.305465	-1.23582
ILMN_2192683	DHX37	DEAH (Asp-Glu-Ala-His) box polypeptide 37 (DHX37)	MGC46245; KIAA1517; FLJ41974; MGC2695; DDX37; MGC4322	NM_032656.2	57647	7.64674	7.55305	7.65535	7.17093	7.50064	7.26772	-1.58266	-0.305284	-1.23566
ILMN_1655422	RPL17	ribosomal protein L17 (RPL17)	rpL23	NM_000985.2	6139	10.7278	10.6475	10.5966	10.2634	10.4248	10.368	-2.02831	-0.305209	-1.2356
ILMN_1788387	UGCGL2	UDP-glucose ceramide glucosyltransferase-like 2 (UGCGL2)	MGC87276; FLJ11485; MGC150689; HUGT2; MGC117360; FLJ10873	NM_020121.2	55757	8.56948	8.50343	8.62169	8.27053	8.30743	8.20163	-2.24463	-0.304999	-1.23542
ILMN_1778078	VPS16	vacuolar protein sorting 16 homolog (S. cerevisiae) (VPS16), transcript variant 1	hVPS16	NM_022575.2	64601	8.70252	8.62972	8.6879	8.2465	8.58158	8.27752	-1.53272	-0.304847	-1.23529
ILMN_1679600	ACOT8	acyl-CoA thioesterase 8 (ACOT8), transcript variant 1	PTE1; hTE; HNAACTE; PTE-2; PTE2; hACTE-III	NM_005469.2	10005	6.93074	7.06501	6.84925	6.69766	6.71012	6.52356	-1.7227	-0.304552	-1.23504
ILMN_1688322	ADIPOR1	adiponectin receptor 1 (ADIPOR1)	ACDCR1; TESBP1A; CGI-45; PAQR1; FLJ42464; FLJ25385; CGI45	NM_015999.2	51094	9.28817	9.0433	9.02569	8.70183	8.8205	8.92125	-1.55752	-0.304533	-1.23502
ILMN_1667257	SDHB	succinate dehydrogenase complex, subunit B, iron sulfur (Ip) (SDHB), nuclear gene encoding mitochondrial protein	SDHIP; SDH; SDH1; PGL4; IP	NM_003000.2	6390	11.0865	10.8987	10.8963	10.5078	10.7773	10.6831	-1.5964	-0.30447	-1.23497
ILMN_1808769	C1orf97	chromosome 1 open reading frame 97 (C1orf97)	MGC14801; FLJ27348; RP11-318L16.3; FLJ27347	NM_032705.2	84791	7.02791	6.99661	7.13955	6.86542	6.69349	6.69209	-1.88137	-0.304356	-1.23487
ILMN_1675612	BLCAP	bladder cancer associated protein (BLCAP)	BC10	NM_006698.2	10904	7.8716	7.808	7.90989	7.50541	7.5691	7.60214	-2.32625	-0.304279	-1.2348
ILMN_1858791		ov47h04.x1 Soares_testis_NHT cDNA clone IMAGE:1640503 3, mRNA sequence			NA	6.06609	6.12102	6.16792	5.93782	5.85798	5.64674	-1.67683	-0.304163	-1.2347
ILMN_1726327	AMY1B	amylase, alpha 1B (salivary) (AMY1B)	AMY1	NM_001008218.1	277	9.07173	9.0493	8.9507	8.72315	8.80252	8.63372	-2.01377	-0.304116	-1.23466
ILMN_2168933	TNIP2	TNFAIP3 interacting protein 2 (TNIP2)	MGC4289; ABIN2; FLIP1; KLIP; ABIN-2	NM_024309.2	79155	6.7046	6.61912	6.72656	6.33628	6.48704	6.3147	-1.98681	-0.304086	-1.23464
ILMN_1673944	MANBAL	mannosidase, beta A, lysosomal-like (MANBAL), transcript variant 2		NM_001003897.1	63905	10.6318	10.4333	10.5063	10.1991	10.2557	10.2049	-2.02035	-0.303887	-1.23447
ILMN_1789457	GNL1	guanine nucleotide binding protein-like 1 (GNL1)	HSR1	NM_005275.2	2794	8.44832	8.29967	8.24793	7.86666	8.15937	8.05853	-1.56203	-0.303785	-1.23438
ILMN_1853693		qf56b03.x1 Soares_testis_NHT cDNA clone IMAGE:1753997 3, mRNA sequence			NA	6.04439	5.92125	5.96578	5.62059	5.81762	5.58195	-1.77551	-0.303754	-1.23435
ILMN_1771903	NUP37	nucleoporin 37kDa (NUP37)	MGC5585; p37; FLJ22618	NM_024057.2	79023	9.5519	9.47857	9.49406	9.04467	9.30583	9.26397	-1.74629	-0.30335	-1.23401
ILMN_1689342	NUBP1	nucleotide binding protein 1 (MinD homolog, E. coli) (NUBP1)	MGC130053; NBP1; MGC117406; NBP; MGC130052	NM_002484.2	4682	7.34784	7.16591	7.07682	6.90448	6.96	6.81762	-1.68626	-0.30282	-1.23355
ILMN_1706990	ZNF271	zinc finger protein 271 (ZNF271)	HZF7; ZNFEB	NM_006629.3	10778	7.7252	7.63154	7.633	7.30652	7.32193	7.45368	-2.07574	-0.302535	-1.23331
ILMN_1725666	GTF2H3	general transcription factor IIH, polypeptide 3, 34kDa (GTF2H3)	BTF2; TFIIH	NM_001516.3	2967	7.16289	7.28077	7.13853	6.83794	6.98755	6.84925	-1.95354	-0.302484	-1.23327
ILMN_1781281	EPPB9	B9 protein (EPPB9)	B9	NM_015681.2	27077	7.35843	7.15076	7.29462	6.84172	7.05202	7.00338	-1.69702	-0.30223	-1.23305
ILMN_1707748	PIM3	PREDICTED: pim-3 oncogene (PIM3)		XM_938171.2	415116	6.84925	6.64962	6.74147	6.52669	6.32012	6.48704	-1.72321	-0.302159	-1.23299
ILMN_3247835	CXorf64	chromosome X open reading frame 64 (CXorf64)		NM_001122716.1	100130613	6.78921	6.83162	6.90087	6.44626	6.65964	6.50938	-1.87816	-0.302141	-1.23297
ILMN_2121207	FAM125A	family with sequence similarity 125, member A (FAM125A)	FLJ32495; CFBP	NM_138401.2	93343	8.99746	9.14975	9.04876	8.76255	8.87897	8.64854	-1.77764	-0.301971	-1.23283
ILMN_2381697	P4HA2	prolyl 4-hydroxylase, alpha polypeptide II (P4HA2), transcript variant 3	4-PH alpha 2	NM_001017974.1	8974	9.91857	10.0147	9.69749	9.47796	9.63281	9.61434	-1.54372	-0.301885	-1.23275
ILMN_1685567	TGDS	TDP-glucose 4,6-dehydratase (TGDS)	TDPGD	NM_014305.2	23483	7.43129	7.60733	7.34873	7.08428	7.22593	7.17193	-1.71032	-0.301737	-1.23263
ILMN_3241212	LOC732419	PREDICTED: hypothetical LOC732419 (LOC732419)		XM_001718658.1	732419	5.36457	5.60288	5.44294	5.07895	5.19377	5.23266	-1.73723	-0.301672	-1.23257
ILMN_2368576	UBA52	ubiquitin A-52 residue ribosomal protein fusion product 1 (UBA52), transcript variant 2	CEP52; HUBCEP52; MGC126881; MGC57125; RPL40; MGC126879	NM_003333.3	7311	7.58871	7.75154	7.67243	7.25267	7.42794	7.42794	-1.82989	-0.301379	-1.23232
ILMN_1661078	LOC644844	PREDICTED: hypothetical LOC644844 (LOC644844)		XM_927939.2	644844	5.51096	5.40939	5.40599	5.20945	5.10852	5.10434	-2.17802	-0.301344	-1.23229
ILMN_1741253	UBR5	ubiquitin protein ligase E3 component n-recognin 5 (UBR5)	DD5; MGC57263; FLJ11310; HYD; EDD1; KIAA0896; EDD	NM_015902.4	51366	7.38543	7.47978	7.32733	7.08534	7.13955	7.06501	-2.15856	-0.300879	-1.23189
ILMN_1731612	UCHL5	ubiquitin carboxyl-terminal hydrolase L5 (UCHL5)	UCH37; CGI-70	NM_015984.2	51377	7.93428	8.02126	8.16641	7.84737	7.70321	7.66888	-1.70211	-0.300828	-1.23185
ILMN_1761808	MCFD2	multiple coagulation factor deficiency 2 (MCFD2)	DKFZp686G21263; LMAN1IP; F5F8D; SDNSF	NM_139279.3	90411	9.69818	9.70684	9.7897	9.54747	9.482	9.26303	-1.66593	-0.300738	-1.23177
ILMN_1794106	FEZ1	fasciculation and elongation protein zeta 1 (zygin I) (FEZ1), transcript variant 2		NM_022549.2	9638	7.43045	7.59021	7.49185	7.17792	7.224	7.20848	-2.17643	-0.300707	-1.23175
ILMN_3279960	LOC642784	PREDICTED: misc_RNA (LOC642784), miscRNA.		XR_038731.1	642784	6.56529	6.60733	6.40599	6.1639	6.24031	6.2724	-1.89149	-0.300668	-1.23171
ILMN_1748770	CKAP5	cytoskeleton associated protein 5 (CKAP5), transcript variant 1	KIAA0097; TOGp; FLJ35359; TOG; ch-TOG	NM_001008938.1	9793	9.7949	9.70529	9.71853	9.4187	9.50422	9.39489	-2.25643	-0.300304	-1.2314
ILMN_1724495	SESTD1	SEC14 and spectrin domains 1 (SESTD1)	DKFZp434O0515; SOLO	NM_178123.3	91404	9.37178	9.39017	9.44956	9.01262	9.08667	9.2114	-1.97187	-0.300271	-1.23138
ILMN_1743635	ALG14	asparagine-linked glycosylation 14 homolog (S. cerevisiae) (ALG14)	MGC19780	NM_144988.2	199857	7.22014	7.25833	7.32012	6.88996	6.96924	7.03892	-2.11868	-0.300156	-1.23128
ILMN_1697614	NHP2L1	NHP2 non-histone chromosome protein 2-like 1 (S. cerevisiae) (NHP2L1), transcript variant 2	OTK27; SNU13; NHPX	NM_001003796.1	4809	8.0677	7.84925	8.04221	7.633	7.65392	7.77281	-1.75058	-0.299811	-1.23098
ILMN_1774659	LOC652388	PREDICTED: similar to nodal modulator 2 isoform 2 (LOC652388)		XM_941821.1	652388	6.76818	6.65535	6.63227	6.24793	6.45121	6.45779	-1.75856	-0.299625	-1.23082
ILMN_1732810	SNX17	sorting nexin 17 (SNX17)	KIAA0064	NM_014748.2	9784	9.94749	9.98142	10.1136	9.70943	9.81858	9.61637	-1.79212	-0.299384	-1.23062
ILMN_1779399	SNRPA	small nuclear ribonucleoprotein polypeptide A (SNRPA)	U1A	NM_004596.3	6626	7.83352	7.78267	7.67172	7.46107	7.59246	7.33628	-1.68417	-0.299367	-1.2306
ILMN_3271081	LOC100128115	PREDICTED: misc_RNA (LOC100128115), miscRNA.		XR_038586.1	100128115	6.36982	6.31651	6.38024	6.01569	5.97499	6.17792	-1.93414	-0.299323	-1.23057
ILMN_1651405	BRD9	bromodomain containing 9 (BRD9), transcript variant 1	LAVS3040; DKFZp686L0539; PRO9856; DKFZp434D0711	NM_023924.3	65980	9.42752	9.40045	9.4735	9.20041	9.19771	9.00619	-1.89943	-0.299059	-1.23034
ILMN_1740395	RAVER1	RAVER1 (RAVER1)	KIAA1978	NM_133452.1	125950	7.0917	7.1918	6.96463	6.75622	6.8392	6.75622	-1.85581	-0.298827	-1.23014
ILMN_1656540	RUVBL1	RuvB-like 1 (E. coli) (RUVBL1)	RVB1; Pontin52; NMP238; TIH1; TIP49; ECP54; TIP49A	NM_003707.1	8607	7.65392	7.6703	7.633	7.18785	7.54458	7.33002	-1.53779	-0.298257	-1.22966
ILMN_2349129	DPP3	dipeptidyl-peptidase 3 (DPP3), transcript variant 1	FLJ11387; DPPIII; FLJ22331	NM_005700.3	10072	7.80607	7.7807	7.70044	7.4187	7.53372	7.44045	-2.17242	-0.298114	-1.22954
ILMN_1735658	RTTN	rotatin (RTTN)	FLJ26356; DKFZP434G145; FLJ39085	NM_173630.2	25914	9.32598	9.41215	9.3031	9.02237	9.1153	9.01095	-2.17892	-0.297534	-1.22904
ILMN_1724959	SEC31A	SEC31 homolog A (S. cerevisiae) (SEC31A), transcript variant 1	KIAA0905; HSPC334; MGC90305; ABP125; SEC31L1; HSPC275; DKFZp686N07171; ABP130	NM_014933.2	22872	9.53177	9.45779	9.46536	9.23745	9.08401	9.24127	-2.02887	-0.297399	-1.22893
ILMN_2326324	LDHC	lactate dehydrogenase C (LDHC), transcript variant 2	MGC111073; LDHX; LDH3	NM_017448.1	3948	6.0045	6.07253	5.926	5.71425	5.83036	5.56682	-1.67981	-0.297206	-1.22876
ILMN_1691526	MAPKAP1	mitogen-activated protein kinase associated protein 1 (MAPKAP1), transcript variant 1	MGC2745; MIP1; SIN1b; SIN1g; SIN1	NM_001006617.1	79109	7.06824	7.1809	7.01569	6.74819	6.84925	6.7761	-2.02103	-0.297098	-1.22867
ILMN_1654773	CASK	calcium/calmodulin-dependent serine protein kinase (MAGUK family) (CASK)	LIN2	NM_003688.1	8573	8.0542	7.83352	7.75889	7.54767	7.58946	7.61839	-1.64371	-0.297031	-1.22861
ILMN_2197247	POLR3A	polymerase (RNA) III (DNA directed) polypeptide A, 155kDa (POLR3A)	RPC155; hRPC155; RPC1	NM_007055.2	11128	7.63009	7.77939	7.70943	7.50064	7.27053	7.45697	-1.72222	-0.296921	-1.22852
ILMN_1750101	S100A11	S100 calcium binding protein A11 (S100A11)	S100C; MLN70	NM_005620.1	6282	10.8908	10.8269	10.7253	10.3457	10.5991	10.6083	-1.57525	-0.296625	-1.22827
ILMN_1779376	GSK3B	glycogen synthase kinase 3 beta (GSK3B)		NM_002093.2	2932	8.19574	8.33673	8.37112	8.09751	8.03397	7.88264	-1.71367	-0.296491	-1.22815
ILMN_1763198	STAT6	signal transducer and activator of transcription 6, interleukin-4 induced (STAT6)	STAT6C; D12S1644; STAT6B; IL-4-STAT	NM_003153.3	6778	8.70529	8.70287	8.61213	8.37981	8.35447	8.39703	-2.4138	-0.296323	-1.22801
ILMN_2222008	KIFC1	kinesin family member C1 (KIFC1)	HSET; MKLP2; RAB6-KIFL; KNSL2; MGC1202; MGC149736; MGC149737	NM_002263.2	3833	7.53605	7.39575	7.43379	7.24698	7.2075	7.02237	-1.7362	-0.296249	-1.22795
ILMN_3287106	LOC100133077	PREDICTED: hypothetical protein LOC100133077 (LOC100133077)		XM_001723265.1	100133077	6.25927	6.2211	6.2211	5.91886	5.96809	5.926	-2.70106	-0.296176	-1.22789
ILMN_2112301	DRAP1	DR1-associated protein 1 (negative cofactor 2 alpha) (DRAP1)	NC2-alpha	NM_006442.2	10589	11.3683	11.2081	11.2053	11.1374	10.9144	10.8419	-1.5284	-0.29602	-1.22775
ILMN_1774596	BSCL2	Bernardinelli-Seip congenital lipodystrophy 2 (seipin) (BSCL2)	SPG17; MGC4694; HMN5; GNG3LG	NM_032667.4	26580	8.53021	8.48301	8.40684	8.01903	8.30332	8.20994	-1.63708	-0.295921	-1.22767
ILMN_1809850	RCN3	reticulocalbin 3, EF-hand calcium binding domain (RCN3)	RLP49	NM_020650.2	57333	9.56891	9.6204	9.61305	9.36894	9.41595	9.1298	-1.64611	-0.295889	-1.22764
ILMN_1721868	KPNA2	karyopherin alpha 2 (RAG cohort 1, importin alpha 1) (KPNA2) XM_001133262 XM_001133265 XM_001133267 XM_001133271	RCH1; IPOA1; SRP1alpha; QIP2	NM_002266.2	3838	8.93015	8.97298	8.86635	8.51294	8.81346	8.55574	-1.56875	-0.29578	-1.22755
ILMN_1664316	CCR9	chemokine (C-C motif) receptor 9 (CCR9), transcript variant A	GPR28; GPR-9-6; CDw199	NM_031200.1	10803	5.67243	5.62936	5.62059	5.31107	5.36457	5.36107	-2.60632	-0.295221	-1.22707
ILMN_3239288	ISM1	isthmin 1 homolog (zebrafish) (ISM1)	bA149I18.1; dJ1077I2.1	NM_080826.1	140862	5.33628	5.50779	5.31832	4.97728	5.14975	5.14975	-1.70556	-0.295207	-1.22706
ILMN_3280667	LOC644619	PREDICTED: misc_RNA (LOC644619), miscRNA.		XR_042317.1	644619	6.24982	6.1127	6.22497	5.93546	5.90689	5.86047	-2.14916	-0.294891	-1.22679
ILMN_1718334	ITPA	inosine triphosphatase (nucleoside triphosphate pyrophosphatase) (ITPA), transcript variant 1	dJ794I6.3; ITPase; HLC14-06-P; C20orf37	NM_033453.2	3704	8.48583	8.59991	8.71493	8.28355	8.45409	8.17891	-1.52181	-0.294705	-1.22663
ILMN_1741148	ALDOA	aldolase A, fructose-bisphosphate (ALDOA), transcript variant 3	MGC17716; ALDA; MGC17767; MGC10942	NM_184043.1	226	12.2433	12.13	12.0275	11.7422	11.968	11.8068	-1.62468	-0.294597	-1.22654
ILMN_2044027	C20orf191	chromosome 20 open reading frame 191 (C20orf191)	bB329D4.2	NM_001039379.1	149934	7.35579	7.25361	7.1334	6.85798	6.99322	7.00787	-1.73536	-0.294577	-1.22653
ILMN_1783771	UBE2Z	PREDICTED: ubiquitin-conjugating enzyme E2Z (putative), transcript variant 3 (UBE2Z)		XM_945544.1	65264	7.62863	7.46761	7.61692	7.2075	7.32733	7.29462	-1.92932	-0.294566	-1.22652
ILMN_1787464	LOC651296	PREDICTED: similar to RAB, member of RAS oncogene family-like 2B isoform 1 (LOC651296)		XM_940424.1	651296	5.71699	5.71973	5.80478	5.44626	5.42962	5.4822	-2.40512	-0.294474	-1.22644
ILMN_2149566	VPS25	vacuolar protein sorting 25 homolog (S. cerevisiae) (VPS25)	MGC10540; FAP20; EAP20; DERP9	NM_032353.2	84313	8.22786	8.14262	8.21578	7.77479	8.06447	7.86357	-1.64109	-0.294474	-1.22644
ILMN_1857915	LOC401397	PREDICTED: hypothetical LOC401397 (LOC401397)		XM_001132317.1	401397	10.1277	10.3128	10.2557	9.92318	9.92896	9.96203	-2.01748	-0.294024	-1.22606
ILMN_3247018	SNORA67	small nucleolar RNA, H/ACA box 67 (SNORA67), small nucleolar RNA.	RNU67; U67	NR_002912.1	26781	7.47005	7.30743	7.30287	6.99774	7.12722	7.07361	-1.88058	-0.293925	-1.22597
ILMN_1722089	RNF217	ring finger protein 217 (RNF217)	C6orf172; MGC26996; dJ84N20.1; IBRDC1	NM_152553.2	154214	6.39403	6.36982	6.16591	5.97269	5.98185	6.09592	-1.70209	-0.293097	-1.22527
ILMN_1704094	PSMA6	proteasome (prosome, macropain) subunit, alpha type, 6 (PSMA6)	MGC22756; IOTA; MGC2333; p27K; PROS27; MGC23846	NM_002791.1	5687	10.4884	10.679	10.6131	10.2896	10.2346	10.3772	-1.83945	-0.293094	-1.22526
ILMN_1796682	PARP3	poly (ADP-ribose) polymerase family, member 3 (PARP3), transcript variant 1	ADPRTL3; ADPRTL2; ADPRT3; pADPRT-3; IRT1; hPARP-3	NM_001003931.1	10039	7.6844	7.57365	7.51806	7.224	7.36545	7.30743	-1.90872	-0.293077	-1.22525
ILMN_2334989	CCT3	chaperonin containing TCP1, subunit 3 (gamma) (CCT3), transcript variant 1	CCTG; TRIC5; TCP-1-gamma; PIG48; CCT-gamma	NM_005998.3	7203	10.2549	10.1058	10.1782	9.8173	10.0467	9.79572	-1.62051	-0.293041	-1.22522
ILMN_3251742	ZNF322A	zinc finger protein 322A (ZNF322A)	ZNF322; HCG12; FLJ23393; bA457M11.2; ZNF388; bA457M11.3; ZNF489	NM_024639.3	79692	7.63009	7.73674	7.61176	7.35579	7.38888	7.35491	-2.24962	-0.293002	-1.22519
ILMN_1771039	GTSE1	G-2 and S-phase expressed 1 (GTSE1)	B99	NM_016426.4	51512	6.44128	6.4446	6.45615	6.2384	6.13955	6.08534	-2.17388	-0.292913	-1.22511
ILMN_1696537	DDIT4L	DNA-damage-inducible transcript 4-like (DDIT4L)	Rtp801L; REDD2	NM_145244.2	115265	8.79669	8.92065	8.85767	8.59134	8.54032	8.56491	-2.28036	-0.292813	-1.22503
ILMN_2384544	ADAM15	ADAM metallopeptidase domain 15 (ADAM15), transcript variant 2	MDC15	NM_003815.3	8751	9.0677	9.03837	8.81089	8.58571	8.71287	8.74012	-1.59292	-0.292755	-1.22498
ILMN_1772455	HDAC3	histone deacetylase 3 (HDAC3)	RPD3; HD3; RPD3-2	NM_003883.2	8841	9.01011	8.7652	9.03232	8.66605	8.63481	8.62863	-1.66254	-0.292716	-1.22494
ILMN_1810467	PPP2R1A	protein phosphatase 2 (formerly 2A), regulatory subunit A , alpha isoform (PPP2R1A)	PR65A; MGC786	NM_014225.3	5518	10.775	10.6318	10.5954	10.4453	10.3749	10.3041	-1.85192	-0.292638	-1.22488
ILMN_1729868	SPRYD4	SPRY domain containing 4 (SPRYD4)	DKFZp686N0877	NM_207344.2	283377	6.67243	6.59395	6.55766	6.38716	6.3837	6.17592	-1.74755	-0.292416	-1.22469
ILMN_3236760	LOC100134816	PREDICTED: misc_RNA (LOC100134816), miscRNA.		XR_037031.1	100134816	5.57592	5.53294	5.67807	5.40259	5.38198	5.12516	-1.54887	-0.292404	-1.22468
ILMN_2179873	PHC3	polyhomeotic homolog 3 (Drosophila) (PHC3)	FLJ12729; HPH3; EDR3; DKFZp313K1221; FLJ12967; MGC88144	NM_024947.2	80012	5.58195	5.74416	5.74416	5.42291	5.31107	5.45943	-1.8289	-0.29229	-1.22458
ILMN_2377977	MTRR	5-methyltetrahydrofolate-homocysteine methyltransferase reductase (MTRR), transcript variant 1	MGC129643; MSR	NM_002454.1	4552	5.61765	5.37851	5.60881	5.19771	5.17792	5.35403	-1.57051	-0.291772	-1.22414
ILMN_1804822	SRXN1	sulfiredoxin 1 homolog (S. cerevisiae) (SRXN1)	Npn3; SRX1; C20orf139; YKL086W; dJ850E9.2	NM_080725.1	140809	9.07815	8.91528	9.03837	8.62352	8.77149	8.76188	-1.8437	-0.291638	-1.22403
ILMN_1713088	MSI2	musashi homolog 2 (Drosophila) (MSI2), transcript variant 1	FLJ36569; MSI2H; MGC3245	NM_138962.2	124540	6.8716	6.85798	6.93546	6.56986	6.6279	6.59246	-2.45132	-0.291609	-1.224
ILMN_1730612	DBNDD2	dysbindin (dystrobrevin binding protein 1) domain containing 2 (DBNDD2), transcript variant 3	HSMNP1; CK1BP; C20orf35	NM_001048223.1	55861	7.87897	8.06824	7.95303	7.6851	7.68159	7.65893	-2.00536	-0.291543	-1.22395
ILMN_2051232	SDHA	succinate dehydrogenase complex, subunit A, flavoprotein (Fp) (SDHA), nuclear gene encoding mitochondrial protein	SDHF; SDH2; FP	NM_004168.1	6389	8.88783	8.76255	8.71081	8.55995	8.51609	8.41066	-1.83976	-0.291492	-1.22391
ILMN_1679520	AGPAT1	1-acylglycerol-3-phosphate O-acyltransferase 1 (lysophosphatidic acid acyltransferase, alpha) (AGPAT1), transcript variant 1	MGC5423; MGC4007; LPAAT-alpha; 1-AGPAT1; G15; LPAATA	NM_006411.2	10554	7.91528	7.73268	7.67243	7.55382	7.49426	7.39832	-1.65877	-0.29133	-1.22377
ILMN_1768127	EBNA1BP2	EBNA1 binding protein 2 (EBNA1BP2)	P40; NOBP; EBP2	NM_006824.1	10969	11.1304	11.2286	11.1638	10.7488	11.0137	10.8866	-1.69833	-0.29122	-1.22367
ILMN_3219643	LOC401537	PREDICTED: misc_RNA (LOC401537), miscRNA.		XR_038712.1	401537	12.2708	12.2168	12.2519	11.7892	12.0669	12.0098	-1.6558	-0.291191	-1.22365
ILMN_3273493	LOC100130092	PREDICTED: misc_RNA (LOC100130092), miscRNA.		XR_039545.1	100130092	8.80381	8.95361	9.037	8.68895	8.64638	8.58609	-1.77257	-0.291001	-1.22349
ILMN_3288032	LOC646576	PREDICTED: hypothetical LOC646576 (LOC646576), miscRNA.		XR_041422.1	646576	8.7252	8.83826	8.82082	8.45327	8.51452	8.54381	-2.17366	-0.290893	-1.2234
ILMN_2396813	C19orf62	chromosome 19 open reading frame 62 (C19orf62), transcript variant 2	HSPC142; FLJ20571	NM_014173.2	29086	8.10329	8.07948	8.01625	7.6632	7.89542	7.76818	-1.79807	-0.290738	-1.22327
ILMN_1694731	CLCN7	chloride channel 7 (CLCN7)	CLC-7; FLJ39644; OPTA2; FLJ46423; CLC7; FLJ26686	NM_001287.3	1186	9.79718	9.63318	9.65678	9.32396	9.50243	9.38866	-1.78566	-0.290694	-1.22323
ILMN_1814589	LOC728037	PREDICTED: similar to Kinesin-like protein KIF22 (Kinesin-like DNA-binding protein) (Kinesin-like protein 4) (LOC728037)		XR_015190.1	728037	6.4822	6.39917	6.24603	5.98185	6.17592	6.09803	-1.62354	-0.290531	-1.22309
ILMN_1716553	KIF23	kinesin family member 23 (KIF23), transcript variant 1	MKLP-1; CHO1; KNSL5; MKLP1	NM_138555.1	9493	5.41278	5.35403	5.37851	4.99095	5.12928	5.15381	-2.02829	-0.290426	-1.223
ILMN_1798311	MBTPS2	membrane-bound transcription factor peptidase, site 2 (MBTPS2)	S2P	NM_015884.1	51360	5.56682	5.53916	5.58796	5.21723	5.35403	5.25172	-2.18046	-0.29032	-1.22291
ILMN_1796751	KIAA1274	KIAA1274 (KIAA1274)	PALD	NM_014431.1	27143	6.41954	6.13955	6.21723	5.93546	5.96578	6.0045	-1.65335	-0.290192	-1.2228
ILMN_2200503	NIT2	nitrilase family, member 2 (NIT2)	MGC111199	NM_020202.2	56954	8.59021	8.51254	8.50819	8.19869	8.3403	8.20163	-2.0218	-0.290109	-1.22273
ILMN_2196569	NUP93	nucleoporin 93kDa (NUP93)	KIAA0095; MGC21106	NM_014669.2	9688	8.61508	8.48502	8.53372	8.16239	8.33271	8.26913	-1.90421	-0.289865	-1.22253
ILMN_1732831	CHST7	carbohydrate (N-acetylglucosamine 6-O) sulfotransferase 7 (CHST7)	C6ST-2	NM_019886.2	56548	8.58496	8.56948	8.64818	8.30697	8.32012	8.30606	-2.53773	-0.289819	-1.22249
ILMN_1723156	PTPRA	protein tyrosine phosphatase, receptor type, A (PTPRA), transcript variant 1	HPTPalpha; RPTPA; LRP; HLPR; PTPRL2; R-PTP-alpha; HPTPA; PTPA; HEPTP	NM_002836.2	5786	6.49985	6.23649	6.36107	6.00899	6.12102	6.09803	-1.67423	-0.28979	-1.22246
ILMN_3304555	LOC728324	PREDICTED: misc_RNA (LOC728324), miscRNA.		XR_015322.2	728324	8.93074	9.01597	8.93015	8.53372	8.83415	8.63988	-1.59022	-0.289699	-1.22239
ILMN_1701331	UBE2M	ubiquitin-conjugating enzyme E2M (UBC12 homolog, yeast) (UBE2M)	hUbc12; UBC12; UBC-RS2	NM_003969.3	9040	10.9338	11.0078	11.0464	10.6344	10.8349	10.6497	-1.78663	-0.289637	-1.22233
ILMN_1790461	C6orf125	chromosome 6 open reading frame 125 (C6orf125)	MGC14833; bA6B20.2	NM_032340.2	84300	9.75589	9.5265	9.72093	9.3271	9.29347	9.51531	-1.52999	-0.289145	-1.22192
ILMN_1725534	ACTN4	actinin, alpha 4 (ACTN4)	DKFZp686K23158; FSGS1; FSGS	NM_004924.3	81	10.6005	10.5054	10.4394	10.3128	10.1491	10.216	-1.84922	-0.289134	-1.22191
ILMN_1740010	PCNX	pecanex homolog (Drosophila) (PCNX)	KIAA0805; PCNXL1; KIAA0995; FLJ45663; FLJ23409	NM_014982.2	22990	7.87774	7.82082	7.76553	7.44791	7.61618	7.53294	-1.9516	-0.289022	-1.22181
ILMN_1813260	TIMM17B	translocase of inner mitochondrial membrane 17 homolog B (yeast) (TIMM17B), nuclear gene encoding mitochondrial protein	TIM17B; JM3; DXS9822	NM_005834.1	10245	7.72383	7.79507	7.74416	7.42122	7.42291	7.55228	-2.09318	-0.288881	-1.22169
ILMN_1654010	AGPAT3	1-acylglycerol-3-phosphate O-acyltransferase 3 (AGPAT3)	MGC4604; LPAAT-GAMMA1	NM_020132.3	56894	5.82273	5.67807	5.64386	5.40599	5.45943	5.41278	-1.96418	-0.288818	-1.22164
ILMN_1683165	FAM20C	family with sequence similarity 20, member C (FAM20C)	RNS; DMP4	NM_020223.2	56975	6.57592	6.56682	6.30378	6.12928	6.18785	6.26303	-1.54449	-0.288783	-1.22161
ILMN_2326262	SORBS1	sorbin and SH3 domain containing 1 (SORBS1), transcript variant 2	SH3P12; DKFZp586P1422; SORB1; R85FL; DKFZp451C066; KIAA1296; FLJ12406; SH3D5; FLAF2; CAP	NM_015385.2	10580	5.53294	5.38888	5.52356	5.08746	5.2211	5.27053	-1.7879	-0.288762	-1.22159
ILMN_1726108	LASS2	LAG1 homolog, ceramide synthase 2 (LASS2), transcript variant 1	SP260; CerS2; MGC987; TMSG1; L3; FLJ10243	NM_181746.2	29956	8.8802	8.70425	8.84078	8.41954	8.51136	8.62826	-1.69551	-0.288688	-1.22153
ILMN_2038776	TXN	thioredoxin (TXN)	DKFZp686B1993; TRX; MGC61975	NM_003329.2	7295	12.6415	12.6929	12.7231	12.3549	12.374	12.4629	-2.20868	-0.288569	-1.22143
ILMN_1777318	C9orf64	chromosome 9 open reading frame 64 (C9orf64)	MGC10999; RP11-575L7.5	NM_032307.3	84267	7.30469	7.23554	7.07039	6.88387	6.95536	6.90569	-1.77734	-0.288569	-1.22143
ILMN_1683980	PLEKHM2	pleckstrin homology domain containing, family M (with RUN domain) member 2 (PLEKHM2)	SKIP; RP11-169K16.1; KIAA0842	NM_015164.1	23207	10.0258	9.90448	10.0735	9.80558	9.71253	9.62004	-1.76817	-0.288547	-1.22141
ILMN_1725271	GPR3	G protein-coupled receptor 3 (GPR3)	ACCA	NM_005281.2	2827	5.7252	5.56377	5.54226	5.23649	5.37156	5.35755	-1.78531	-0.28854	-1.2214
ILMN_1707124	TFPI	tissue factor pathway inhibitor (lipoprotein-associated coagulation inhibitor) (TFPI), transcript variant 1	TFI; LACI; EPI	NM_006287.4	7035	11.0358	10.9982	10.9314	10.5893	10.8024	10.7082	-1.82032	-0.288516	-1.22138
ILMN_3294318	LOC644173	PREDICTED: hypothetical LOC644173 (LOC644173), miscRNA.		XR_039995.1	644173	5.73877	5.65821	5.71425	5.25927	5.42962	5.55766	-1.60698	-0.288227	-1.22114
ILMN_2358980	ILK	integrin-linked kinase (ILK), transcript variant 2	DKFZp686F1765; P59	NM_001014794.1	3611	9.0642	9.07868	9.31039	8.82464	8.84737	8.91678	-1.65476	-0.288163	-1.22108
ILMN_1661653	DET1	de-etiolated homolog 1 (Arabidopsis) (DET1)	FLJ10103; MGC126157; MGC126156	NM_017996.2	55070	6.6851	6.71836	6.87897	6.34163	6.53294	6.54381	-1.61308	-0.288019	-1.22096
ILMN_1709350	CXCL3	chemokine (C-X-C motif) ligand 3 (CXCL3)	SCYB3; MIP2B; MGSA gamma; MIP-2b; GRO3; CINC-2b; GROg	NM_002090.2	2921	5.56682	5.56682	5.70321	5.20555	5.38543	5.38198	-1.75048	-0.287962	-1.22091
ILMN_1781454	RAE1	RAE1 RNA export 1 homolog (S. pombe) (RAE1), transcript variant 1	MIG14; MGC117333; dJ800J21.1; FLJ30608; MGC126076; Mnrp41; MRNP41; dJ481F12.3; MGC126077	NM_003610.3	8480	8.87866	8.8558	8.75589	8.48945	8.70009	8.43754	-1.61304	-0.287757	-1.22074
ILMN_1776088	NAT9	N-acetyltransferase 9 (GCN5-related, putative) (NAT9)	EBSP; DKFZP564C103	NM_015654.3	26151	8.30058	8.32103	8.44253	8.08428	8.16239	7.95478	-1.74568	-0.287563	-1.22058
ILMN_2299221	RABGGTA	Rab geranylgeranyltransferase, alpha subunit (RABGGTA), transcript variant 1		NM_182836.1	5875	6.19377	6.10852	6.11894	5.74147	6.02015	5.79701	-1.60636	-0.287537	-1.22055
ILMN_1682368	LRWD1	leucine-rich repeats and WD repeat domain containing 1 (LRWD1)	DKFZp434K1815	NM_152892.1	222229	7.88081	7.9431	7.95478	7.66605	7.732	7.51806	-1.8314	-0.287527	-1.22055
ILMN_2164242	UBE2F	ubiquitin-conjugating enzyme E2F (putative) (UBE2F)	NCE2; MGC18120	NM_080678.1	140739	10.2871	10.2228	10.2211	9.80945	10.0562	10.0028	-1.71387	-0.287514	-1.22053
ILMN_1663827	SMYD5	SMYD family member 5 (SMYD5)	RRG1; NN8-4AG; RAI15; ZMYND23	NM_006062.2	10322	5.62059	5.6893	5.71425	5.20555	5.52982	5.42626	-1.51836	-0.287499	-1.22052
ILMN_1660579	CRLF3	cytokine receptor-like factor 3 (CRLF3)	CREME9; FRWS; CYTOR4; MGC20661	NM_015986.2	51379	5.80735	5.90929	5.89724	5.50779	5.49185	5.75221	-1.5973	-0.287342	-1.22039
ILMN_1750178	LOC653450	PREDICTED: hypothetical LOC653450 (LOC653450)		XM_370557.3	653450	6.37851	6.40769	6.47086	6.00675	6.30378	6.08534	-1.57166	-0.287066	-1.22016
ILMN_1684385	COPB2	coatomer protein complex, subunit beta 2 (beta prime) (COPB2)	beta-COP	NM_004766.1	9276	10.5574	10.318	10.4121	10.0363	10.179	10.211	-1.6158	-0.287035	-1.22013
ILMN_3263290	LOC100129697	PREDICTED: hypothetical protein LOC100129697 (LOC100129697)		XM_001715229.1	100129697	6.12516	6.20163	6.13545	5.81506	5.853	5.9331	-2.17523	-0.287027	-1.22012
ILMN_1723048	GJC2	gap junction protein, gamma 2, 47kDa (GJC2)	MGC105119; PMLDAR; CX46.6; GJA12; Cx47	NM_020435.2	57165	6.51885	6.64386	6.63372	6.21529	6.41447	6.30561	-1.79534	-0.287019	-1.22012
ILMN_1755321	AAAS	achalasia, adrenocortical insufficiency, alacrimia (Allgrove, triple-A) (AAAS)	ADRACALA; AAASb; DKFZp586G1624; GL003; ADRACALIN; AAA	NM_015665.4	8086	6.40599	6.45121	6.29094	6.17393	6.0268	6.08746	-1.86469	-0.286651	-1.21981
ILMN_1759883	SRP9	signal recognition particle 9kDa (SRP9)	ALURBP	NM_003133.1	6726	7.28448	7.15785	7.30834	6.824	7.03232	7.03452	-1.65006	-0.286606	-1.21977
ILMN_2393144	ARL6IP4	ADP-ribosylation-like factor 6 interacting protein 4 (ARL6IP4), transcript variant 3	MGC814; SRp25; SR-25	NM_001002251.1	51329	8.79442	8.75789	8.61397	8.4545	8.53372	8.31832	-1.65351	-0.28658	-1.21974
ILMN_1662340	ZNF358	zinc finger protein 358 (ZNF358)	ZFEND; FLJ10390	NM_018083.4	140467	9.57289	9.62589	9.57913	9.30172	9.38478	9.23242	-2.09273	-0.286326	-1.21953
ILMN_1758823	SMARCB1	SWI/SNF related, matrix associated, actin dependent regulator of chromatin, subfamily b, member 1 (SMARCB1), transcript variant 2	Sfh1p; RDT; hSNFS; SNF5; Snr1; SNF5L1; INI1; BAF47	NM_001007468.1	6598	8.57969	8.35579	8.25644	8.1467	8.10852	8.07842	-1.52729	-0.286097	-1.21934
ILMN_1693664	POMGNT1	protein O-linked mannose beta1,2-N-acetylglucosaminyltransferase (POMGNT1)	MGAT1.2; FLJ20277; DKFZp761B182; GnTI.2; MEB	NM_017739.2	55624	9.95739	10.0541	10.1156	9.76918	9.78807	9.71149	-2.02642	-0.286093	-1.21933
ILMN_2381138	SEH1L	SEH1-like (S. cerevisiae) (SEH1L), transcript variant 1	Seh1; SEH1A; SEC13L; SEH1B	NM_001013437.1	81929	6.84046	6.83036	6.74953	6.40599	6.48382	6.67243	-1.64508	-0.28604	-1.21929
ILMN_1666258	AMFR	autocrine motility factor receptor (AMFR)	GP78; RNF45	NM_001144.4	267	5.99548	6.08746	6.1918	5.66391	5.87036	5.88264	-1.58384	-0.285942	-1.21921
ILMN_1715013	ERMAP	erythroblast membrane-associated protein (Scianna blood group) (ERMAP), transcript variant 1	SC; MGC118813; PRO2801; MGC118810; MGC118811; MGC118812; RD	NM_001017922.1	114625	6.49025	6.4822	6.50779	6.25361	6.02237	6.34696	-1.53243	-0.28577	-1.21906
ILMN_1745075	RPLP0	ribosomal protein, large, P0 (RPLP0), transcript variant 2	L10E; PRLP0; MGC111226; P0; MGC88175; RPP0	NM_053275.3	6175	10.8206	10.7278	10.74	10.3709	10.6043	10.456	-1.74378	-0.285712	-1.21901
ILMN_1759948	RNF5P1	PREDICTED: ring finger protein 5 pseudogene 1 (RNF5P1), misc RNA.		XR_000528.1	286140	8.52904	8.51964	8.49145	8.17243	8.34341	8.16742	-1.92151	-0.285625	-1.21894
ILMN_1699354	EPHA2	EPH receptor A2 (EPHA2)	ECK	NM_004431.2	1969	7.21335	7.16189	7.03232	6.77479	6.9331	6.84298	-1.77994	-0.285563	-1.21889
ILMN_2390318	CIDEA	cell death-inducing DFFA-like effector a (CIDEA), transcript variant 2	CIDE-A	NM_198289.1	1149	5.58796	5.63807	5.74953	5.2211	5.44626	5.45286	-1.58742	-0.285118	-1.21851
ILMN_1692272	TEX261	testis expressed 261 (TEX261)	TEG-261; MGC32043	NM_144582.2	113419	7.20555	7.34696	7.25739	6.91886	7.15279	6.88387	-1.55042	-0.284791	-1.21823
ILMN_1668748	MED15	mediator complex subunit 15 (MED15), transcript variant 1	CTG7A; TIG1; TNRC7; TIG-1; DKFZp686A2214; FLJ42935; DKFZp762B1216; MED15; CAG7A; FLJ42282; ARC105	NM_001003891.1	51586	6.5157	6.36632	6.21335	6.0268	6.13955	6.07468	-1.55698	-0.28478	-1.21822
ILMN_1857017		mRNA; cDNA DKFZp761E1721 (from clone DKFZp761E1721)			NA	7.91169	7.77808	7.72588	7.49905	7.57061	7.49265	-1.89101	-0.284443	-1.21794
ILMN_1794692	DNMT3B	DNA (cytosine-5-)-methyltransferase 3 beta (DNMT3B), transcript variant 1	ICF; M.HsaIIIB	NM_006892.3	1789	5.66391	5.64097	5.79961	5.27798	5.48543	5.48864	-1.62194	-0.284144	-1.21769
ILMN_1711122	LOC653073	PREDICTED: similar to golgi autoantigen, golgin family member, transcript variant 3 (LOC653073)		XM_930835.1	653073	5.66959	5.67243	5.7252	5.46597	5.4822	5.26679	-1.76134	-0.284084	-1.21764
ILMN_2390859	NFKB2	nuclear factor of kappa light polypeptide gene enhancer in B-cells 2 (p49/p100) (NFKB2), transcript variant 2	LYT10; LYT-10	NM_002502.3	4791	7.56071	7.33539	7.2854	7.06501	7.16591	7.09908	-1.58193	-0.283833	-1.21742
ILMN_1695821	ACTR1B	ARP1 actin-related protein 1 homolog B, centractin beta (yeast) (ACTR1B)	CTRN2; ARP1B	NM_005735.2	10120	8.14873	8.00619	7.99322	7.81314	7.83036	7.6532	-1.7205	-0.283813	-1.21741
ILMN_1758827	RTN4IP1	reticulon 4 interacting protein 1 (RTN4IP1), nuclear gene encoding mitochondrial protein	NIMP; MGC12934	NM_032730.4	84816	7.15785	7.35491	7.25172	6.98299	7.01123	6.91886	-1.85689	-0.283799	-1.2174
ILMN_1659627	LOC647322	PREDICTED: hypothetical protein LOC647322 (LOC647322)		XM_934719.1	647322	6.54844	6.44294	6.49506	6.1334	6.31832	6.18388	-1.85686	-0.283612	-1.21724
ILMN_1669718	PSENEN	presenilin enhancer 2 homolog (C. elegans) (PSENEN)	MSTP064; MDS033; PEN-2; PEN2	NM_172341.1	55851	7.48864	7.50303	7.29646	7.09592	7.19771	7.14568	-1.74125	-0.282941	-1.21667
ILMN_2375002	MAP4K4	mitogen-activated protein kinase kinase kinase kinase 4 (MAP4K4), transcript variant 3	KIAA0687; FLJ90111; FLJ20373; HGK; NIK; FLJ10410; FLH21957	NM_145687.2	9448	8.11894	8.17792	8.10486	7.94837	7.76553	7.8392	-1.91986	-0.282871	-1.21661
ILMN_3236164	LOC727868	PREDICTED: misc_RNA (LOC727868), miscRNA.		XR_015141.2	727868	5.46597	5.37504	5.23649	5.14568	4.9542	5.12928	-1.56843	-0.282783	-1.21654
ILMN_1662316	VPS33A	vacuolar protein sorting 33 homolog A (S. cerevisiae) (VPS33A)	FLJ23187; FLJ22395	NM_022916.4	65082	6.75221	6.62059	6.84172	6.48704	6.44128	6.43796	-1.8142	-0.282747	-1.21651
ILMN_1656372	PES1	pescadillo homolog 1, containing BRCT domain (zebrafish) (PES1)	PES	NM_014303.2	23481	7.56224	7.50541	7.58496	7.24031	7.40429	7.15987	-1.70911	-0.282715	-1.21648
ILMN_1696320	LOC652673	PREDICTED: similar to tripartite motif protein 15 isoform alpha (LOC652673)		XM_942254.1	652673	5.76553	5.81506	5.64674	5.42962	5.58195	5.36807	-1.65679	-0.282566	-1.21636
ILMN_1795300	FLJ41603	FLJ41603 protein (FLJ41603)		NM_001001669.2	389337	7.03562	7.17293	7.12516	6.66818	6.88387	6.93428	-1.56317	-0.282462	-1.21627
ILMN_1865604		602703330F1 NCI_CGAP_Skn3 cDNA clone IMAGE:4800534 5, mRNA sequence			NA	5.47897	5.42291	5.47897	5.26303	5.12102	5.14975	-2.06221	-0.282351	-1.21617
ILMN_1715705	SSNA1	Sjogren syndrome nuclear autoantigen 1 (SSNA1)	NA14; NA-14; N14	NM_003731.1	8636	8.41912	8.29002	8.21578	8.07842	8.07521	7.92481	-1.68158	-0.282157	-1.21601
ILMN_2175112	KCNS3	potassium voltage-gated channel, delayed-rectifier, subfamily S, member 3 (KCNS3)	MGC9481; KV9.3	NM_002252.3	3790	5.65535	5.78136	5.92125	5.41954	5.49506	5.59694	-1.54927	-0.282143	-1.216
ILMN_1763080	QARS	glutaminyl-tRNA synthetase (QARS)	PRO2195; GLNRS	NM_005051.1	5859	11.1488	11.1057	11.0812	10.8094	10.9438	10.7367	-1.83667	-0.281903	-1.2158
ILMN_1712487	LGTN	ligatin (LGTN)	HCA56	NM_006893.2	1939	8.51728	8.41066	8.46393	8.28586	8.15279	8.108	-1.86148	-0.281738	-1.21566
ILMN_2060413	CD24	CD24 molecule (CD24)	CD24A	NM_013230.2	100133941	9.9757	9.95361	9.98755	9.75322	9.57611	9.74315	-1.90185	-0.281464	-1.21543
ILMN_1769902	HSPBP1	hsp70-interacting protein (HSPBP1)		NM_012267.3	23640	6.25361	6.2384	6.29829	5.84046	6.07253	6.03342	-1.71881	-0.281296	-1.21529
ILMN_1794956	BBS9	Bardet-Biedl syndrome 9 (BBS9), transcript variant 3	PTHB1; C18; MGC118917; B1; D1	NM_001033604.1	27241	6.70183	6.82782	6.83668	6.50938	6.44791	6.56529	-1.94105	-0.281248	-1.21525
ILMN_1666924	PINK1	PTEN induced putative kinase 1 (PINK1), nuclear gene encoding mitochondrial protein	FLJ27236; PARK6; BRPK	NM_032409.2	65018	9.25432	9.13571	9.02956	8.81025	8.90929	8.85643	-1.75045	-0.281208	-1.21521
ILMN_1657436	FGFR1OP2	FGFR1 oncogene partner 2 (FGFR1OP2)	DKFZp564O1863; HSPC123-like	NM_015633.1	26127	7.95245	7.77873	7.76553	7.4446	7.57818	7.63081	-1.63821	-0.28104	-1.21507
ILMN_2368718	CENPM	centromere protein M (CENPM), transcript variant 2	C22orf18; bK250D10.2; PANE1; MGC861; CENP-M	NM_001002876.1	79019	7.50541	7.62644	7.57289	7.22882	7.45697	7.17592	-1.53747	-0.28101	-1.21505
ILMN_3293159	LOC100132767	PREDICTED: hypothetical protein LOC100132767 (LOC100132767)		XM_001725561.1	100132767	6.71149	6.61765	6.69627	6.48059	6.26115	6.44128	-1.72	-0.280797	-1.21487
ILMN_1684051	WASF2	WAS protein family, member 2 (WASF2)	SCAR2; WAVE2; dJ393P12.2	NM_006990.2	10163	7.58346	7.45697	7.32012	7.14364	7.23936	7.13545	-1.62499	-0.280701	-1.21478
ILMN_2055477	EXOSC7	exosome component 7 (EXOSC7)	hRrp42p; FLJ26543; Rrp42p; KIAA0116; p8; EAP1; RRP42	NM_015004.2	23016	8.40769	8.38457	8.44915	7.95012	8.24365	8.20555	-1.52738	-0.280697	-1.21478
ILMN_1691861	FASTK	Fas-activated serine/threonine kinase (FASTK), transcript variant 1	FAST	NM_006712.3	10922	7.34518	7.14364	7.18686	6.80478	6.99435	7.03452	-1.53069	-0.280675	-1.21476
ILMN_1746968	PHF1	PHD finger protein 1 (PHF1), transcript variant 2	PHF2	NM_024165.1	5252	7.23362	7.06286	7.01346	6.89966	6.73877	6.83036	-1.63904	-0.280385	-1.21452
ILMN_3204874	LOC100131009	PREDICTED: hypothetical protein LOC100131009 (LOC100131009)		XM_001716640.1	100131009	5.59991	5.66959	5.62352	5.23266	5.3147	5.50462	-1.62232	-0.280348	-1.21449
ILMN_1728603	LOC643713	PREDICTED: hypothetical protein LOC643713 (LOC643713)		XM_927009.1	643713	5.42291	5.40259	5.59395	5.06178	5.23649	5.2817	-1.55332	-0.279825	-1.21405
ILMN_3280126	LOC100131323	PREDICTED: misc_RNA (LOC100131323), miscRNA.		XR_039461.1	100131323	7.32283	7.1819	7.41616	6.93074	7.02237	7.12928	-1.56368	-0.279501	-1.21378
ILMN_2402805	TRPC4AP	transient receptor potential cation channel, subfamily C, member 4 associated protein (TRPC4AP), transcript variant 1	TRUSS; C20orf188; TRRP4AP	NM_015638.2	26133	9.26139	9.2148	9.17941	8.93899	9.01262	8.86573	-2.02032	-0.279419	-1.21371
ILMN_1754529	SPG7	spastic paraplegia 7 (pure and complicated autosomal recessive) (SPG7), nuclear gene encoding mitochondrial protein, transcript variant 1	CAR; FLJ37308; SPG5C; MGC126332; CMAR; MGC126331; PGN	NM_003119.2	6687	9.15279	9.06366	9.2148	8.84266	8.94339	8.80768	-1.86699	-0.279175	-1.2135
ILMN_1815083	WHSC2	Wolf-Hirschhorn syndrome candidate 2 (WHSC2)	NELF-A; P/OKcl.15; FLJ25112; FLJ10442; NELFA	NM_005663.2	7469	7.06501	7.02015	6.98185	6.58045	6.81378	6.83542	-1.59685	-0.279121	-1.21346
ILMN_1688480	CCND1	cyclin D1 (CCND1)	PRAD1; D11S287E; BCL1; U21B31	NM_053056.2	595	12.0833	12.1232	12.1508	11.7519	12.0174	11.7507	-1.54604	-0.27911	-1.21345
ILMN_1751228	C20orf46	chromosome 20 open reading frame 46 (C20orf46)	FLJ11190	NM_018354.1	55321	5.50462	5.54226	5.53294	5.20163	5.27798	5.26303	-2.41261	-0.279055	-1.2134
ILMN_1763228	MEF2D	myocyte enhancer factor 2D (MEF2D)	DKFZp686I1536	NM_005920.2	4209	8.78234	8.66676	8.54535	8.35182	8.47046	8.33584	-1.63763	-0.278778	-1.21317
ILMN_1751051	C7orf25	chromosome 7 open reading frame 25 (C7orf25), transcript variant 1	MGC2821; FLJ21167	NM_001099858.1	79020	7.98982	7.75622	7.82909	7.67384	7.57061	7.49506	-1.5826	-0.278541	-1.21297
ILMN_1770245	EPB41L5	erythrocyte membrane protein band 4.1 like 5 (EPB41L5)	FLJ12957; KIAA1548; BE37	NM_020909.2	57669	7.11166	7.16491	7.13853	6.87652	6.87529	6.82782	-2.48832	-0.278489	-1.21292
ILMN_1670037	POLR2L	polymerase (RNA) II (DNA directed) polypeptide L, 7.6kDa (POLR2L)	hsRPB10b; RPABC5; RBP10; RPB10beta; RPB7.6; RPB10; hRPB7.6	NM_021128.3	5441	8.22062	8.05474	8.2293	7.90147	7.95303	7.81506	-1.74722	-0.278365	-1.21282
ILMN_1735157	GALNT12	UDP-N-acetyl-alpha-D-galactosamine:polypeptide N-acetylgalactosaminyltransferase 12 (GalNAc-T12) (GALNT12)	GalNAc-T12; FLJ21212	NM_024642.3	79695	6.64962	6.59991	6.58946	6.31651	6.46271	6.22497	-1.72429	-0.27827	-1.21274
ILMN_1787326	SNORA65	small nucleolar RNA, H/ACA box 65 (SNORA65), small nucleolar RNA.	U65; RNU65	NR_002449.1	26783	5.64674	5.76553	5.85798	5.46597	5.37851	5.59096	-1.57632	-0.278269	-1.21274
ILMN_1801348	GOT2	glutamic-oxaloacetic transaminase 2, mitochondrial (aspartate aminotransferase 2) (GOT2), nuclear gene encoding mitochondrial protein	FLJ40994	NM_002080.2	2806	10.0448	10.0467	10.0711	9.7662	9.77742	9.7848	-2.78776	-0.278054	-1.21256
ILMN_1766222	LARP4B	La ribonucleoprotein domain family, member 4B (LARP4B)	RP11-164C1.3; KIAA0217; DKFZp686M23113	NM_015155.1	23185	8.61985	8.6575	8.75154	8.32733	8.44211	8.42668	-1.94282	-0.277589	-1.21217
ILMN_2411116	FGFR1OP	FGFR1 oncogene partner (FGFR1OP), transcript variant 1	FOP	NM_007045.2	11116	6.22882	6.29646	6.17792	6	5.91648	5.9542	-2.10739	-0.277507	-1.2121
ILMN_1684440	PXN	paxillin (PXN)	FLJ16691	NM_002859.1	5829	7.34252	7.2854	7.2182	7.12516	6.89239	6.99661	-1.6705	-0.27732	-1.21194
ILMN_1666512	SKIV2L	superkiller viralicidic activity 2-like (S. cerevisiae) (SKIV2L)	SKIV2; DDX13; SKI2W; SKI2; 170A; HLP	NM_006929.4	6499	8.51333	8.45656	8.62315	8.3097	8.26021	8.19131	-1.85525	-0.277273	-1.2119
ILMN_2352009	ACADVL	acyl-Coenzyme A dehydrogenase, very long chain (ACADVL), nuclear gene encoding mitochondrial protein, transcript variant 1	ACAD6; VLCAD; LCACD	NM_000018.2	37	8.15937	8.01903	8.14313	7.77413	7.90689	7.81057	-1.8549	-0.276646	-1.21138
ILMN_1673649	HYOU1	hypoxia up-regulated 1 (HYOU1)	DKFZp686N08236; ORP150	NM_006389.2	10525	7.22014	7.43129	7.24698	7.10119	6.90569	7.06178	-1.54544	-0.276584	-1.21132
ILMN_1830474		nt78g02.s1 NCI_CGAP_Pr3 cDNA clone IMAGE:1204658, mRNA sequence			NA	5.47249	5.36807	5.49185	5.23266	5.10014	5.16993	-1.92118	-0.276563	-1.21131
ILMN_2157435	DYNLRB1	dynein, light chain, roadblock-type 1 (DYNLRB1)	BLP; ROBLD1; BITH; DNLC2A; DNCL2A	NM_014183.2	83658	10.0285	10.0028	10.0076	9.62936	9.67101	9.90884	-1.5614	-0.276551	-1.2113
ILMN_3193306	C14orf109	chromosome 14 open reading frame 109 (C14orf109), transcript variant 2	DKFZP564F1123	NM_015676.1	26175	7.93192	7.81442	8.04056	7.73268	7.55075	7.67384	-1.58765	-0.276548	-1.21129
ILMN_1806037	TK1	thymidine kinase 1, soluble (TK1)	TK2	NM_003258.2	7083	8.09381	8.10014	7.99322	7.77215	7.87897	7.70667	-1.83443	-0.276461	-1.21122
ILMN_3210741	LOC642956	PREDICTED: hypothetical LOC642956 (LOC642956)		XM_938166.3	642956	7.94603	7.69139	7.8189	7.45204	7.59395	7.5812	-1.56973	-0.276379	-1.21115
ILMN_1654653	KLC1	kinesin light chain 1 (KLC1), transcript variant 1	KLC1; KLC; KNS2; KNS2A; MGC15245	NM_005552.4	3831	9.20016	9.11061	8.99039	8.71939	8.92273	8.83067	-1.58454	-0.276123	-1.21094
ILMN_2390453	BCKDHB	branched chain keto acid dehydrogenase E1, beta polypeptide (maple syrup urine disease) (BCKDHB), nuclear gene encoding mitochondrial protein, transcript variant 2	E1B	NM_000056.2	594	6.7866	6.80864	7.01011	6.56834	6.60733	6.6014	-1.70586	-0.276094	-1.21091
ILMN_1753498	COASY	Coenzyme A synthase (COASY), transcript variant 4	FLJ35179; pOV-2; NBP; UKR1; PPAT; DPCK	NM_001042532.1	80347	9.34983	9.19081	9.36172	8.98128	9.10826	8.9847	-1.73778	-0.276041	-1.21087
ILMN_1730019	BRD1	bromodomain containing 1 (BRD1)	BRPF2; BRL; BRPF1; DKFZp686F0325	NM_014577.1	23774	6.65392	6.35579	6.42962	6.2075	6.21335	6.1918	-1.53446	-0.275559	-1.21046
ILMN_2353633	EMR2	egf-like module containing, mucin-like, hormone receptor-like 2 (EMR2), transcript variant 2	CD312; DKFZp781B135	NM_152916.1	30817	5.56071	5.39575	5.54535	5.08321	5.32553	5.26679	-1.53291	-0.275428	-1.21035
ILMN_3199780	LOC401076	PREDICTED: misc_RNA (LOC401076), miscRNA.		XR_038201.1	401076	11.115	11.2434	11.2521	10.9301	10.8987	10.9554	-2.01077	-0.275408	-1.21034
ILMN_1753241	SNTA1	syntrophin, alpha 1 (dystrophin-associated protein A1, 59kDa, acidic component) (SNTA1)	SNT1; dJ1187J4.5; TACIP1	NM_003098.2	6640	7.69209	7.63009	7.73471	7.38888	7.49025	7.35226	-1.95222	-0.275165	-1.21013
ILMN_3245879	FAM13AOS	FAM13A opposite strand (non-protein coding) (FAM13AOS), non-coding RNA.		NR_002806.2	285512	5.59991	5.36457	5.36457	5.22497	5.16189	5.11686	-1.57941	-0.275113	-1.21009
ILMN_1658995	ACOT9	acyl-CoA thioesterase 9 (ACOT9), transcript variant 2	MT-ACT48; CGI-16; ACATE2	NM_001033583.2	23597	9.42185	9.45882	9.48684	9.11166	9.24674	9.18413	-2.06704	-0.274992	-1.20999
ILMN_1794807	LOC653696	PREDICTED: similar to cache domain containing 1 (LOC653696)		XM_933387.1	653696	6.07895	5.7761	5.89239	5.66676	5.63517	5.62059	-1.53653	-0.274976	-1.20997
ILMN_2142117	LYPLAL1	lysophospholipase-like 1 (LYPLAL1)	KIAA1238	NM_138794.1	127018	9.54863	9.55785	9.64043	9.35997	9.19648	9.36588	-1.80327	-0.274856	-1.20987
ILMN_1719649	TMEM63A	transmembrane protein 63A (TMEM63A)	KIAA0489; KIAA0792; RP4-559A3.1	NM_014698.1	9725	5.94953	5.90207	5.90689	5.7761	5.6837	5.47573	-1.52569	-0.274322	-1.20943
ILMN_1701940	FAM73B	family with sequence similarity 73, member B (FAM73B)	C9orf54; FLJ14596; FLJ00199	NM_032809.2	84895	6.3733	6.29829	6.30925	6.15178	6.03342	5.97269	-1.86283	-0.274316	-1.20942
ILMN_1692473	PRMT1	protein arginine methyltransferase 1 (PRMT1), transcript variant 2	IR1B4; ANM1; HRMT1L2; HCP1	NM_198319.2	3276	11.1456	11.2253	11.2473	10.8563	11.0902	10.849	-1.56909	-0.274182	-1.20931
ILMN_1811624	THADA	thyroid adenoma associated (THADA), transcript variant 1	GITA; FLJ44016; KIAA1767; FLJ44876; FLJ21877; FLJ77530	NM_022065.4	63892	7.32012	7.1639	7.32193	6.94251	7.10957	6.93192	-1.63561	-0.273983	-1.20914
ILMN_3276859	LOC401127	PREDICTED: misc_RNA (LOC401127), miscRNA.		XR_017898.1	401127	6.29646	6.33092	6.32733	5.96578	6.03782	6.12928	-1.98126	-0.273938	-1.2091
ILMN_1779854	CARD6	caspase recruitment domain family, member 6 (CARD6)	CINCIN1	NM_032587.2	84674	6.61912	6.51412	6.71149	6.35579	6.34341	6.32373	-1.85741	-0.273936	-1.2091
ILMN_3237507	LOC552889	hypothetical protein LOC552889 (LOC552889)		NM_001136262.1	552889	7.80413	7.824	7.72656	7.46189	7.46107	7.61102	-1.8516	-0.27357	-1.2088
ILMN_1720829	ZFP36	zinc finger protein 36, C3H type, homolog (mouse) (ZFP36)	NUP475; GOS24; TIS11; TTP; G0S24; RNF162A	NM_003407.2	7538	7.98242	8.00282	7.88325	7.59096	7.75154	7.70529	-1.82317	-0.273567	-1.20879
ILMN_1750299	LOC729826	PREDICTED: hypothetical protein LOC729826 (LOC729826)		XM_001131447.1	729826	5.38543	5.34696	5.39575	5	5.16591	5.1416	-1.90588	-0.273543	-1.20877
ILMN_1749338	ANKRD29	ankyrin repeat domain 29 (ANKRD29)	FLJ25053	NM_173505.2	147463	5.79961	5.89482	5.95187	5.69766	5.67525	5.45286	-1.52301	-0.273506	-1.20874
ILMN_1781943	FAM83D	family with sequence similarity 83, member D (FAM83D)	C20orf129; FLJ38341; dJ616B8.3	NM_030919.2	81610	7.6359	7.7761	7.73268	7.50144	7.43129	7.39146	-1.92395	-0.273498	-1.20873
ILMN_1826531		cDNA FLJ32080 fis, clone OCBBF2000015			NA	7.81314	7.83983	7.74416	7.56071	7.50144	7.5157	-2.21405	-0.273094	-1.2084
ILMN_1789342	NDUFS2	NADH dehydrogenase (ubiquinone) Fe-S protein 2, 49kDa (NADH-coenzyme Q reductase) (NDUFS2)		NM_004550.3	4720	6.8936	6.91289	6.96232	6.63807	6.67807	6.63372	-2.38276	-0.272981	-1.2083
ILMN_1813641	C9orf167	chromosome 9 open reading frame 167 (C9orf167)	FLJ20245; RP13-122B23.4	NM_017723.2	54863	7.72996	7.71081	7.80478	7.55075	7.4814	7.39489	-1.90616	-0.272836	-1.20818
ILMN_2415911	ENOX2	ecto-NOX disulfide-thiol exchanger 2 (ENOX2), transcript variant 1	COVA1; tNOX; APK1	NM_006375.2	10495	6.79831	6.86913	6.81506	6.60881	6.6014	6.4545	-1.88899	-0.272597	-1.20798
ILMN_1651385	MFN2	mitofusin 2 (MFN2), nuclear gene encoding mitochondrial protein	HSG; CMT2A; KIAA0214; CMT2A2; MARF; CPRP1	NM_014874.2	9927	7.45779	7.40599	7.36457	7.10329	7.13853	7.16892	-2.22165	-0.272539	-1.20793
ILMN_2070355	SDHAF1	succinate dehydrogenase complex assembly factor 1 (SDHAF1)		NM_001042631.1	644096	7.57061	7.40939	7.43546	7.32373	7.18785	7.0864	-1.55982	-0.272496	-1.2079
ILMN_1769545	PRPF19	PRP19/PSO4 pre-mRNA processing factor 19 homolog (S. cerevisiae) (PRPF19)	NMP200; PRP19; hPSO4; UBOX4; SNEV; PSO4	NM_014502.3	27339	7.6872	7.61545	7.73742	7.30378	7.45615	7.46271	-1.78625	-0.272475	-1.20788
ILMN_3279712	LOC642590	PREDICTED: misc_RNA (LOC642590), miscRNA.		XR_037021.1	642590	9.4028	9.4543	9.62534	9.26515	9.14898	9.25101	-1.63842	-0.272434	-1.20784
ILMN_1789990	ARFGEF2	ADP-ribosylation factor guanine nucleotide-exchange factor 2 (brefeldin A-inhibited) (ARFGEF2)	FLJ23723; dJ1164I10.1; BIG2	NM_006420.2	10564	6.2075	6.22304	6.1918	5.97269	5.97269	5.86047	-2.12315	-0.272162	-1.20762
ILMN_1733115	RALGAPB	Ral GTPase activating protein, beta subunit (non-catalytic) (RALGAPB)	FLJ43928; DKFZp686N19168; FLJ43270; dJ1100H13.1; RP5-1100H13.1; DKFZp781M2411	NM_020336.2	57148	6.8802	6.926	6.83289	6.52042	6.73877	6.56377	-1.68282	-0.272042	-1.20752
ILMN_1657862	AHCY	S-adenosylhomocysteine hydrolase (AHCY)	SAHH	NM_000687.1	191	10.9595	10.8636	10.7986	10.6196	10.6311	10.5554	-1.91402	-0.271891	-1.20739
ILMN_1720526	CENPN	centromere protein N (CENPN)	FLJ22660; C16orf60; CENP-N; FLJ13607; BM039	NM_018455.3	55839	8.17143	8.07895	8.14924	7.76022	7.8586	7.96521	-1.75245	-0.271862	-1.20737
ILMN_1764415	ZNF585A	zinc finger protein 585A (ZNF585A), transcript variant 1	FLJ23765; FLJ31827	NM_152655.2	199704	7.22304	7.12516	7.05745	6.79831	6.88753	6.90448	-1.83667	-0.271774	-1.20729
ILMN_1809285	DCP1A	DCP1 decapping enzyme homolog A (S. cerevisiae) (DCP1A)	Nbla00360; FLJ21691; SMIF; SMAD4IP1; HSA275986	NM_018403.4	55802	7.00675	7.03342	6.9331	6.8125	6.71287	6.63372	-1.81534	-0.271393	-1.20697
ILMN_2377980	PPP1CA	protein phosphatase 1, catalytic subunit, alpha isoform (PPP1CA), transcript variant 1	PP-1A; MGC15877; MGC1674; PPP1A	NM_002708.3	5499	7.3733	7.43796	7.40003	7.05528	7.27612	7.06609	-1.65409	-0.271263	-1.20686
ILMN_2174394	MMS19L	MMS19-like (MET18 homolog, S. cerevisiae) (MMS19L)	MMS19; MGC99604; MET18; hMMS19	NM_022362.2	64210	9.49025	9.45533	9.44729	9.17866	9.26421	9.13673	-2.09386	-0.271086	-1.20672
ILMN_2198893	LOC407835	mitogen-activated protein kinase kinase 2 pseudogene (LOC407835), non-coding RNA.		NR_002144.1	407835	8.95041	8.83668	8.86728	8.63554	8.65392	8.5519	-1.99313	-0.271004	-1.20665
ILMN_1706839	TCERG1	transcription elongation regulator 1 (TCERG1), transcript variant 1	MGC133200; TAF2S; CA150	NM_006706.3	10915	7.41616	7.3147	7.37417	7.04002	7.00899	7.24317	-1.60491	-0.270951	-1.2066
ILMN_1721669	IDH3B	isocitrate dehydrogenase 3 (NAD+) beta (IDH3B), nuclear gene encoding mitochondrial protein, transcript variant 3	FLJ11043; H-IDHB; MGC903	NM_174856.1	3420	9.82671	9.80735	9.85425	9.5889	9.62644	9.46025	-1.91001	-0.270905	-1.20656
ILMN_1698330	NIT1	nitrilase 1 (NIT1)	MGC57670	NM_005600.1	4817	6.12309	6.17792	6.13955	5.76288	6.04002	5.82528	-1.54563	-0.270794	-1.20647
ILMN_1676600	SEC24C	SEC24 family, member C (S. cerevisiae) (SEC24C), transcript variant 2	KIAA0079	NM_198597.1	9632	9.74164	9.64187	9.54747	9.47675	9.37873	9.2635	-1.56442	-0.270667	-1.20637
ILMN_1679731	SLC15A4	solute carrier family 15, member 4 (SLC15A4)	PHT1; FP12591; PTR4	NM_145648.2	121260	8.25692	8.15634	8.13955	7.89845	7.86728	7.97556	-1.9534	-0.270504	-1.20623
ILMN_1767320	MAPK1	mitogen-activated protein kinase 1 (MAPK1), transcript variant 2	p40; PRKM2; MAPK2; PRKM1; p38; p41; ERK; ERT1; P42MAPK; p41mapk; ERK2	NM_138957.2	5594	6.86295	6.88874	6.90207	6.64097	6.52199	6.67948	-1.95295	-0.270441	-1.20618
ILMN_1764764	MUM1	melanoma associated antigen (mutated) 1 (MUM1)	MGC163315; MGC131891; HSPC211; FLJ22283; FLJ14868; MUM-1	NM_032853.2	84939	8.42626	8.51885	8.46025	8.21383	8.24174	8.13853	-2.06882	-0.27042	-1.20616
ILMN_1779032	LOC642502	PREDICTED: similar to succinate dehydrogenase complex, subunit C isoform 3 precursor (LOC642502)		XM_926594.2	642502	7.66888	7.79312	7.77742	7.49426	7.38111	7.55305	-1.76097	-0.270334	-1.20609
ILMN_1706706	WDR68	WD repeat domain 68 (WDR68), transcript variant 2	AN11; HAN11	NM_001003725.1	10238	8.46025	8.37112	8.46883	8.05582	8.27333	8.16138	-1.68844	-0.269888	-1.20571
ILMN_1736597	TKT	transketolase (Wernicke-Korsakoff syndrome) (TKT)	TKT1; FLJ34765	NM_001064.1	7086	11.0323	11.0612	10.8733	10.7113	10.7796	10.6664	-1.72146	-0.269856	-1.20569
ILMN_1801098	TSLP	thymic stromal lymphopoietin (TSLP), transcript variant 2		NM_138551.2	85480	6.01123	6.03342	6.0045	5.70044	5.72247	5.81762	-2.12721	-0.269541	-1.20542
ILMN_1683933	SERPINA9	serpin peptidase inhibitor, clade A (alpha-1 antiproteinase, antitrypsin), member 9 (SERPINA9)	SERPINA11; GCET1; SERPINA11b	NM_175739.2	327657	5.52356	5.36457	5.36807	5.04876	5.17393	5.22497	-1.6455	-0.269517	-1.2054
ILMN_1761155	PABPC1	poly(A) binding protein, cytoplasmic 1 (PABPC1)	PABPL1; PABPC2; PABP1; PAB1; PABP	NM_002568.3	26986	12.47	12.47	12.2934	12.1073	12.2041	12.1135	-1.72324	-0.269486	-1.20538
ILMN_1723706	GRAMD4	GRAM domain containing 4 (GRAMD4)	KIAA0767; MGC90497; MGC149847; dJ439F8.1; dA59H18.1	NM_015124.2	23151	6.29094	6.33092	6.3147	6.01569	5.95884	6.15381	-1.81115	-0.269404	-1.20531
ILMN_1706660	HYI	hydroxypyruvate isomerase homolog (E. coli) (HYI)	MGC20767; HT036; RP11-506B15.5	NM_031207.2	81888	7.37156	7.33807	7.50383	7.09592	7.22882	7.08108	-1.69582	-0.269208	-1.20515
ILMN_1799198	OTUB2	OTU domain, ubiquitin aldehyde binding 2 (OTUB2)	C14orf137; FLJ21916; OTB2; MGC3102; OTU2	NM_023112.2	78990	6.07253	5.90448	6.06609	5.77347	5.7761	5.6865	-1.76902	-0.269011	-1.20498
ILMN_1743763	TJAP1	tight junction associated protein 1 (peripheral) (TJAP1)	PILT; RP3-337H4.1; TJP4; DKFZp686F06131	NM_080604.1	93643	8.60103	8.54148	8.65821	8.2738	8.35226	8.36807	-2.0025	-0.268865	-1.20486
ILMN_1772998	LOC647436	PREDICTED: similar to ribosomal protein L5, transcript variant 1 (LOC647436)		XM_937113.2	647436	9.99986	9.88585	10.0602	9.58496	9.76122	9.79377	-1.55927	-0.268639	-1.20467
ILMN_1655684	SARS2	seryl-tRNA synthetase 2, mitochondrial (SARS2), nuclear gene encoding mitochondrial protein	SERS; SARSM; FLJ20450; mtSerRS; SYS; SerRSmt; SARS	NM_017827.2	54938	8.09276	8.11894	8.00394	7.8586	7.8189	7.73335	-1.90974	-0.26826	-1.20435
ILMN_3275388	LOC340274	PREDICTED: misc_RNA (LOC340274), miscRNA.		XR_017256.2	340274	7.33896	7.35755	7.29186	6.91409	7.07788	7.1918	-1.5535	-0.268201	-1.20431
ILMN_1749583	KIAA1285	KIAA1285 protein (KIAA1285)		NM_015694.1	27153	5.96116	5.926	6.05961	5.60585	5.76818	5.76818	-1.70828	-0.268185	-1.20429
ILMN_1789492	ZDHHC8	zinc finger, DHHC-type containing 8 (ZDHHC8)	ZNF378; ZDHHCL1	NM_013373.2	29801	11.0436	10.982	10.9873	10.7355	10.8614	10.6121	-1.63067	-0.267945	-1.20409
ILMN_1794522	EIF5A	eukaryotic translation initiation factor 5A (EIF5A)	MGC104255; EIF-5A; uORF A; uORF; MGC99547; EIF5A1	NM_001970.3	1984	10.8776	10.8254	10.8797	10.6358	10.5966	10.5468	-2.21347	-0.267838	-1.204
ILMN_1732127	RBKS	ribokinase (RBKS)	DKFZp686G13268; RBSK	NM_022128.1	64080	6.40939	6.38543	6.38888	6.19574	6.02459	6.15987	-1.88146	-0.267834	-1.204
ILMN_1842448		tz52a07.x1 NCI_CGAP_Brn52 cDNA clone IMAGE:2292180 3, mRNA sequence			NA	5.50144	5.54226	5.63807	5.23649	5.37504	5.26679	-1.80851	-0.267817	-1.20399
ILMN_1793522	PRKAB1	protein kinase, AMP-activated, beta 1 non-catalytic subunit (PRKAB1)	AMPK; HAMPKb; MGC17785	NM_006253.4	5564	7.1127	6.99548	7.13237	6.76686	6.87897	6.79181	-1.85469	-0.267637	-1.20383
ILMN_1659888	PPP1R14B	protein phosphatase 1, regulatory (inhibitor) subunit 14B (PPP1R14B)	SOM172; PLCB3N; PNG; PHI-1	NM_138689.2	26472	11.2036	11.1037	11.1348	10.8667	10.9514	10.8213	-1.94013	-0.267565	-1.20377
ILMN_1706959	TIMM22	translocase of inner mitochondrial membrane 22 homolog (yeast) (TIMM22), nuclear gene encoding mitochondrial protein	TIM22; TEX4	NM_013337.2	29928	9.02042	9.00675	9.1375	8.64854	8.89875	8.81474	-1.5365	-0.267547	-1.20376
ILMN_2051867	PTCD2	pentatricopeptide repeat domain 2 (PTCD2)	FLJ12598	NM_024754.3	79810	6.82146	6.86419	6.87774	6.67666	6.58195	6.50303	-1.87294	-0.267246	-1.20351
ILMN_1788540	LOC732075	PREDICTED: similar to pleckstrin homology-like domain, family B, member 1 (LOC732075)		XM_001131797.1	732075	5.64674	5.43962	5.57289	5.19377	5.36457	5.30012	-1.58747	-0.266928	-1.20324
ILMN_1753482	FAM86C	family with sequence similarity 86, member C (FAM86C), transcript variant 2	MGC45068; FLJ10661; FLJ27199	NM_152563.2	55199	6.34341	6.2211	6.18388	5.95884	6.04876	5.94017	-1.79829	-0.266875	-1.2032
ILMN_3181420	HMGXB4	HMG box domain containing 4 (HMGXB4), transcript variant 1	THC211630; HMGBCG	NM_005487.3	10042	7.51254	7.52513	7.45204	7.07682	7.31198	7.30104	-1.57219	-0.266626	-1.20299
ILMN_1715809	OGFRL1	opioid growth factor receptor-like 1 (OGFRL1)	dJ331H24.1; FLJ21079; MGC102783	NM_024576.3	79627	6.85798	7.04985	6.94953	6.67384	6.67384	6.71012	-1.82028	-0.266523	-1.20291
ILMN_1710885	LOC387867	PREDICTED: similar to 40S ribosomal protein SA (p40) (34/67 kDa laminin receptor) (Colon carcinoma laminin-binding protein) (NEM/1CHD4) (Multidrug resistance-associated protein MGr1-Ag) (LOC387867)		XM_939738.2	387867	12.5448	12.4298	12.3782	12.1508	12.3016	12.101	-1.59023	-0.26647	-1.20286
ILMN_1908824		Human small nuclear RNA U6atac, partial sequence			NA	5.52669	5.30012	5.34341	5.18587	5.15381	5.03122	-1.53456	-0.266445	-1.20284
ILMN_1768751	MTA3	metastasis associated 1 family, member 3 (MTA3)	KIAA1266	NM_020744.2	57504	8.21091	8.2854	8.02791	7.94603	7.89664	7.88387	-1.57782	-0.265898	-1.20238
ILMN_3206312	LOC643873	PREDICTED: misc_RNA (LOC643873), miscRNA.		XR_038120.1	643873	6.32373	6.58646	6.42459	6.15583	6.16993	6.2114	-1.58233	-0.265875	-1.20236
ILMN_1672191	ATP5F1	ATP synthase, H+ transporting, mitochondrial F0 complex, subunit B1 (ATP5F1), nuclear gene encoding mitochondrial protein	PIG47; MGC24431	NM_001688.4	515	9.6786	9.848	9.85814	9.48824	9.64548	9.45348	-1.5398	-0.265846	-1.20234
ILMN_3244515	LOC100134009	PREDICTED: hypothetical protein LOC100134009 (LOC100134009)		XM_001721522.1	100134009	5.46271	5.29646	5.54226	5.21723	5.12516	5.16189	-1.592	-0.265716	-1.20223
ILMN_1773337	DKK1	dickkopf homolog 1 (Xenopus laevis) (DKK1)	DKK-1; SK	NM_012242.2	22943	10.6096	10.6151	10.5545	10.2456	10.3508	10.386	-1.95134	-0.26562	-1.20215
ILMN_1742869	TBC1D20	TBC1 domain family, member 20 (TBC1D20)	FLJ45119; C20orf140	NM_144628.1	128637	6.96924	6.88753	6.71699	6.57592	6.66534	6.53605	-1.53219	-0.265484	-1.20204
ILMN_1656501	DUSP5	dual specificity phosphatase 5 (DUSP5)	HVH3; DUSP	NM_004419.3	1847	7.3733	7.31832	7.48945	7.1639	7.11061	7.11061	-1.85292	-0.265312	-1.2019
ILMN_1753575	GP1BA	glycoprotein Ib (platelet), alpha polypeptide (GP1BA)	BSS; CD42b-alpha; MGC34595; CD42B; GP1B	NM_000173.4	2811	6.69627	6.54998	6.52199	6.37504	6.23649	6.36107	-1.66366	-0.265215	-1.20181
ILMN_1798817	SDR42E1	short chain dehydrogenase/reductase family 42E, member 1 (SDR42E1)		NM_145168.2	93517	5.59694	5.64097	5.56071	5.27426	5.30012	5.42962	-1.85129	-0.264872	-1.20153
ILMN_1659936	PPP1R15A	protein phosphatase 1, regulatory (inhibitor) subunit 15A (PPP1R15A)	GADD34	NM_014330.2	23645	10.2612	10.314	10.3475	10.0618	10.1383	9.92807	-1.69696	-0.264853	-1.20151
ILMN_3286067	LOC391578	PREDICTED: misc_RNA (LOC391578), miscRNA.		XR_019645.1	391578	7.76951	7.62498	7.72928	7.30104	7.49025	7.53838	-1.52142	-0.264698	-1.20138
ILMN_1670130	ARID3A	AT rich interactive domain 3A (BRIGHT-like) (ARID3A)	E2FBP1; BRIGHT; DRIL3; DRIL1	NM_005224.2	1820	6.92362	6.78005	6.71012	6.55305	6.51096	6.55612	-1.71542	-0.264551	-1.20126
ILMN_1737585	VARS2	valyl-tRNA synthetase 2, mitochondrial (putative) (VARS2), nuclear gene encoding mitochondrial protein	VARS2L; MGC138259; VARSL; MGC142165	NM_020442.3	57176	6.91767	6.80607	6.98185	6.69488	6.55612	6.66107	-1.69655	-0.264507	-1.20123
ILMN_1692707	C2orf79	chromosome 2 open reading frame 79 (C2orf79)		NM_001013663.1	391356	7.87529	7.94251	7.83226	7.55536	7.69905	7.60363	-1.84965	-0.264009	-1.20081
ILMN_2049274	ARHGDIG	Rho GDP dissociation inhibitor (GDI) gamma (ARHGDIG)	RHOGDI-3	NM_001176.2	398	5.54226	5.55459	5.42962	5.37504	5.18982	5.16993	-1.5881	-0.263891	-1.20071
ILMN_2341254	STARD13	START domain containing 13 (STARD13), transcript variant alpha	FLJ37385; DLC2; GT650	NM_178006.1	90627	7.73877	7.7046	7.75556	7.49665	7.42206	7.48864	-2.24168	-0.263852	-1.20068
ILMN_2096116	HSP90B1	heat shock protein 90kDa beta (Grp94), member 1 (HSP90B1)	GP96; GRP94; TRA1; ECGP	NM_003299.1	7184	12.5821	12.5127	12.5375	12.265	12.3486	12.2275	-2.01571	-0.263751	-1.2006
ILMN_1716336	CKAP5	cytoskeleton associated protein 5 (CKAP5), transcript variant 1	KIAA0097; TOGp; FLJ35359; TOG; ch-TOG	NM_001008938.1	9793	5.80219	5.76288	5.57592	5.37504	5.49825	5.47897	-1.55283	-0.26291	-1.1999
ILMN_1696946	LOC654174	PREDICTED: similar to lethal (2) k00619 CG4775-PA (LOC654174)		XM_940438.2	654174	6.41616	6.36807	6.33985	6.12102	6.08321	6.13134	-2.25885	-0.262838	-1.19984
ILMN_1781565	MESDC1	mesoderm development candidate 1 (MESDC1)	MGC99595	NM_022566.1	59274	6.24413	6.15987	6.0268	5.83036	5.85798	5.9542	-1.60937	-0.262754	-1.19977
ILMN_1715994	HGS	hepatocyte growth factor-regulated tyrosine kinase substrate (HGS)	HRS; ZFYVE8	NM_004712.3	9146	10.2982	10.2032	10.2102	9.99831	10.0884	9.83684	-1.5508	-0.262683	-1.19971
ILMN_1666634	FAF1	Fas (TNFRSF6) associated factor 1 (FAF1)	CGI-03; hFAF1; FLJ37524; HFAF1s	NM_007051.2	11124	6.97728	6.84423	6.92006	6.59246	6.71012	6.65105	-1.86179	-0.262648	-1.19968
ILMN_1730731	ERLIN1	ER lipid raft associated 1 (ERLIN1)	KE04; Erlin-1; KEO4; RP11-316M21.1; SPFH1; C10orf69	NM_006459.2	10613	6.99548	7.05528	7.16792	6.83289	6.76155	6.83668	-1.79988	-0.262521	-1.19957
ILMN_1663751	CYCSL1	cytochrome c, somatic-like 1 (CYCSL1) on chromosome 6.	HS11; bA513I15.3; HCP15	NR_001561.1	157317	9.42543	9.40237	9.46659	9.12567	9.15355	9.22786	-2.09073	-0.262435	-1.1995
ILMN_1755937	ANXA2	annexin A2 (ANXA2), transcript variant 2	P36; LPC2D; ANX2L4; ANX2; PAP-IV; CAL1H; LIP2; LPC2	NM_001002857.1	302	8.88111	8.98783	8.99915	8.76885	8.57856	8.73369	-1.64768	-0.262333	-1.19942
ILMN_2231608	LOC441294	similar to CTAGE6 (LOC441294)		NM_001008747.1	441294	5.20163	5.25172	5.1416	4.91648	4.84298	5.04876	-1.66176	-0.262245	-1.19934
ILMN_2303166	MBNL3	muscleblind-like 3 (Drosophila) (MBNL3), transcript variant R	MBLX39; MBLX; FLJ11316; CHCR; MBXL	NM_133486.1	55796	5.63227	5.50144	5.46271	5.21723	5.30743	5.2854	-1.77409	-0.262118	-1.19924
ILMN_1712944	AES	amino-terminal enhancer of split (AES), transcript variant 2	AES-2; ESP1; GRG5; GRG; TLE5; AES-1	NM_001130.5	166	10.4333	10.2138	10.236	10.0922	10.0532	9.95158	-1.53155	-0.262023	-1.19916
ILMN_3289172	LOC100132774	PREDICTED: hypothetical protein LOC100132774, transcript variant 2 (LOC100132774)		XM_001725935.1	100132774	5.67243	5.79701	5.79181	5.52356	5.53294	5.41954	-1.81432	-0.261737	-1.19892
ILMN_2151048	STAG1	stromal antigen 1 (STAG1)	DKFZp781D1416; SA1	NM_005862.2	10274	7.63081	7.52042	7.47005	7.20653	7.3733	7.25644	-1.65368	-0.261671	-1.19887
ILMN_2267787	HPS1	Hermansky-Pudlak syndrome 1 (HPS1), transcript variant 3	HPS; MGC5277	NM_182639.1	3257	7.20848	7.15987	7.15076	6.94953	6.98641	6.79831	-1.74437	-0.261619	-1.19882
ILMN_3240617	LOC100133237	PREDICTED: hypothetical protein LOC100133237 (LOC100133237)		XM_001714169.1	100133237	5.37156	5.49825	5.37156	5.14975	5.23649	5.07039	-1.70283	-0.26158	-1.19879
ILMN_3234142	LOC728855	hypothetical LOC728855 (LOC728855), non-coding RNA.		NR_024510.1	728855	7.38888	7.44045	7.51964	7.15987	7.14975	7.2555	-1.85951	-0.261283	-1.19854
ILMN_2211910	LOC649159	similar to CG7467-PA, isoform A (LOC649159)		NM_001040069.1	649159	5.49825	5.35403	5.42291	5.0268	5.24413	5.2211	-1.53344	-0.261052	-1.19835
ILMN_1756146	WDR45	WD repeat domain 45 (WDR45), transcript variant 1	JM5; WDRX1; WIPI-4; WIPI4	NM_007075.3	11152	7.05745	7.02348	7.08002	6.75622	6.92955	6.69209	-1.6062	-0.261025	-1.19833
ILMN_1683678	SPATS2L	spermatogenesis associated, serine-rich 2-like (SPATS2L), transcript variant 2	DNAPTP6; DKFZp564A2416	NM_001100422.1	26010	9.92941	9.7848	9.74702	9.62845	9.59264	9.45718	-1.57289	-0.260986	-1.1983
ILMN_2224833	ADIPOR2	adiponectin receptor 2 (ADIPOR2)	MGC4640; ACDCR2; PAQR2; FLJ21432	NM_024551.2	79602	8.50422	8.42375	8.44253	8.10119	8.20555	8.2817	-1.76858	-0.260688	-1.19805
ILMN_2395451	ASS1	argininosuccinate synthetase 1 (ASS1), transcript variant 2	CTLN1; ASS	NM_054012.3	445	10.124	10.1764	10.0337	9.80413	9.83368	9.91453	-1.82396	-0.260589	-1.19797
ILMN_3260859	LOC100129622	PREDICTED: similar to hCG1640833 (LOC100129622)		XM_001714876.1	100129622	5.90448	5.84298	5.87036	5.47249	5.66391	5.70044	-1.60105	-0.260329	-1.19775
ILMN_1777366	TTC35	tetratricopeptide repeat domain 35 (TTC35)	KIAA0103	NM_014673.3	9694	6.90448	7.04111	6.90929	6.71562	6.57743	6.78136	-1.58016	-0.26016	-1.19761
ILMN_1742167	TUBA1C	tubulin, alpha 1c (TUBA1C)	MGC14580; TUBA6; bcm948; MGC10851	NM_032704.2	84790	13.1472	13.1	13.0719	12.8211	12.9658	12.7519	-1.66253	-0.260093	-1.19756
ILMN_1790534	MAP2K3	mitogen-activated protein kinase kinase 3 (MAP2K3), transcript variant A	MEK3; MKK3; MAPKK3; PRKMK3	NM_002756.3	5606	9.25361	9.3031	9.29715	8.90689	9.06366	9.10303	-1.71552	-0.260091	-1.19755
ILMN_1788160	KIF5B	kinesin family member 5B (KIF5B)	KINH; U-KHC; KNS; UKHC; KNS1	NM_004521.1	3799	8.03727	8.12102	8.14975	7.78594	7.94895	7.79377	-1.7024	-0.259792	-1.19731
ILMN_1774890	LAS1L	LAS1-like (S. cerevisiae) (LAS1L)	FLJ12525; RP3-475B7.2; dJ475B7.2	NM_031206.3	81887	7.85922	7.65893	7.77281	7.45368	7.57818	7.47978	-1.6338	-0.259771	-1.19729
ILMN_1760718	ZMIZ2	zinc finger, MIZ-type containing 2 (ZMIZ2), transcript variant 1	DKFZp761I2123; KIAA1886; ZIMP7; hZIMP7	NM_031449.3	83637	6.66676	6.69627	6.74416	6.41954	6.57289	6.33628	-1.59609	-0.259493	-1.19706
ILMN_1781031	CTBP2	C-terminal binding protein 2 (CTBP2), transcript variant 2		NM_022802.1	1488	5.48864	5.45615	5.36457	5.2891	5.12928	5.1127	-1.65129	-0.259428	-1.197
ILMN_2168314	PGM3	phosphoglucomutase 3 (PGM3)	AGM1; PAGM; DKFZp434B187	NM_015599.1	5238	8.926	9.06609	9.07762	8.82845	8.71356	8.74953	-1.73981	-0.259386	-1.19697
ILMN_1667519	RRAS2	related RAS viral (r-ras) oncogene homolog 2 (RRAS2)	TC21	NM_012250.3	22800	9.13237	9.29002	9.27263	8.92392	8.98413	9.00927	-1.7796	-0.259232	-1.19684
ILMN_1735093	TIMELESS	timeless homolog (Drosophila) (TIMELESS)	TIM; FLJ12640; TIM1; FLJ20714; hTIM	NM_003920.2	8914	7.26679	7.24698	7.27146	6.94603	7.08215	6.97957	-1.97329	-0.25916	-1.19678
ILMN_2362457	ZDHHC16	zinc finger, DHHC-type containing 16 (ZDHHC16), transcript variant 1	APH2; MGC2993	NM_032327.2	84287	8.24698	8.13545	8.12516	7.89057	7.96463	7.87529	-1.88411	-0.259033	-1.19668
ILMN_1674866	TADA3	transcriptional adaptor 3 (TADA3), transcript variant 1	hADA3; FLJ20221; FLJ21329; ADA3	NM_006354.2	10474	9.02901	9.04549	9.07975	8.87098	8.76089	8.74584	-1.96261	-0.258846	-1.19652
ILMN_1753467	SAMD4B	sterile alpha motif domain containing 4B (SAMD4B)	FLJ10211; SMGB; MGC99832	NM_018028.2	55095	6.53138	6.37851	6.44791	6.26866	6.07895	6.23458	-1.58675	-0.258538	-1.19627
ILMN_1679209	HSPA9	heat shock 70kDa protein 9 (mortalin) (HSPA9), nuclear gene encoding mitochondrial protein	MTHSP75; MGC4500; GRP75; mot-2; CSA; PBP74; MOT2; HSPA9B; MOT	NM_004134.4	3313	10.1824	10.0934	10.1567	9.83857	9.89194	9.92659	-2.04313	-0.258475	-1.19621
ILMN_1735798	OSBPL3	oxysterol binding protein-like 3 (OSBPL3), transcript variant 3	MGC21526; DKFZp667P1518; ORP3; OSBP3; KIAA0704; ORP-3	NM_145321.1	26031	5.72792	5.59096	5.63807	5.49185	5.33628	5.35403	-1.6858	-0.258263	-1.19604
ILMN_2228044	TBC1D23	TBC1 domain family, member 23 (TBC1D23)	NS4ATP1; FLJ11046; DKFZp667G062	NM_018309.1	55773	7.43879	7.47978	7.44045	7.29462	7.09803	7.1918	-1.7441	-0.258191	-1.19598
ILMN_1761363	VAMP4	vesicle-associated membrane protein 4 (VAMP4)	VAMP24	NM_003762.3	8674	7.32643	7.3672	7.32823	7.11061	7.1179	7.02015	-2.08105	-0.25773	-1.1956
ILMN_1732537	HEATR2	HEAT repeat containing 2 (HEATR2) XM_935824 XM_935825	FLJ31671; FLJ25564; FLJ20397; FLJ39381	NM_017802.2	54919	8.46393	8.43754	8.4446	8.2211	8.19032	8.16189	-2.37326	-0.257589	-1.19548
ILMN_1706275	C8orf33	chromosome 8 open reading frame 33 (C8orf33)	FLJ20989	NM_023080.1	65265	7.71287	7.56453	7.68229	7.30195	7.48704	7.39917	-1.61016	-0.257178	-1.19514
ILMN_2371964	MRPS12	mitochondrial ribosomal protein S12 (MRPS12), nuclear gene encoding mitochondrial protein, transcript variant 3	MPR-S12; MT-RPS12; RPS12; RPSM12; RPMS12	NM_033363.1	6183	10.6699	10.7543	10.7186	10.8442	11.07	11.0008	1.60003	0.257349	1.19528
ILMN_1806387	LOC340598	PREDICTED: similar to Keratin, type I cytoskeletal 18 (Cytokeratin-18) (CK-18) (Keratin-18) (K18) (LOC340598)		XM_926996.1	340598	6.43296	6.36632	6.4545	6.73742	6.69905	6.58946	1.82055	0.257382	1.19531
ILMN_2251978	C21orf66	chromosome 21 open reading frame 66 (C21orf66), transcript variant 1	FLJ90561; GCFC; BM-020	NM_016631.3	94104	6.52826	6.5157	6.52199	6.82018	6.77742	6.74147	2.28573	0.257705	1.19558
ILMN_1663519	SLC24A3	solute carrier family 24 (sodium/potassium/calcium exchanger), member 3 (SLC24A3)	NCKX3	NM_020689.3	57419	5.32193	5.35403	5.46271	5.70321	5.61471	5.59395	1.79109	0.257736	1.1956
ILMN_1793729	C15orf39	chromosome 15 open reading frame 39 (C15orf39)	DKFZP434H132; FLJ46337; MGC117209	NM_015492.4	56905	6.03562	6.08958	6.0045	6.3345	6.30743	6.26115	2.10418	0.257791	1.19565
ILMN_1743753	IFT81	intraflagellar transport 81 homolog (Chlamydomonas) (IFT81), transcript variant 1	CDV1R; MGC102777; CDV-1R; CDV-1; CDV1; MGC4027	NM_014055.2	28981	5.47573	5.32553	5.32912	5.65535	5.66107	5.58796	1.78579	0.257998	1.19582
ILMN_1832208		Homo sapiens, clone IMAGE:4052238, mRNA, partial cds			NA	8.63481	8.47816	8.6489	8.91976	8.80993	8.808	1.66068	0.258605	1.19632
ILMN_2340052	NCOR2	nuclear receptor co-repressor 2 (NCOR2), transcript variant 1	TNRC14; SMRT; TRAC1; SMRTE; TRAC-1; SMRTE-tau; CTG26	NM_006312.3	9612	10.386	10.3853	10.3872	10.7974	10.57	10.5669	1.55748	0.25861	1.19633
ILMN_1769092	FAM176B	family with sequence similarity 176, member B (FAM176B)	FLJ10647; RP11-268J15.2	NM_018166.1	55194	7.89118	7.75689	7.90087	8.04439	8.22159	8.05907	1.58647	0.258707	1.19641
ILMN_1782954	HIP2	huntingtin interacting protein 2 (HIP2)	LIG; UBE2K; HYPG	NM_005339.3	3093	8.11998	8.27938	8.22641	8.54458	8.40854	8.44956	1.70923	0.258971	1.19662
ILMN_1785439	CD79B	CD79B antigen (immunoglobulin-associated beta) (CD79B), transcript variant 2	IGB; B29	NM_021602.1	974	5.1127	5.12102	5.31832	5.49185	5.44294	5.39917	1.60853	0.260645	1.19801
ILMN_3244607	FAM117B	family with sequence similarity 117, member B (FAM117B)	FLJ38771; DKFZp686H01244; FAM117B	NM_173511.2	150864	6.24793	6.2114	6.20359	6.53761	6.35579	6.55152	1.69018	0.260664	1.19803
ILMN_1715635	ATP6V0E1	ATPase, H+ transporting, lysosomal 9kDa, V0 subunit e1 (ATP6V0E1)	Vma21p; ATP6V0E; Vma21; ATP6H; M9.2	NM_003945.3	8992	10.6071	10.7679	10.7773	11.019	10.8976	11.019	1.65102	0.261098	1.19839
ILMN_2226314	DBR1	debranching enzyme homolog 1 (S. cerevisiae) (DBR1)		NM_016216.2	51163	6.30378	6.24982	6.41616	6.61324	6.61618	6.52513	1.77843	0.261593	1.1988
ILMN_2317751	REC8	REC8 homolog (yeast) (REC8), transcript variant 1	HR21spB; REC8; MGC950; REC8L1; Rec8p	NM_005132.2	9985	5.9331	5.74147	5.84046	6.13545	6.15987	6.0045	1.60379	0.261598	1.19881
ILMN_2187533	CSRNP2	cysteine-serine-rich nuclear protein 2 (CSRNP2)	FLJ25576; C12orf2; TAIP-12; C12orf22	NM_030809.1	81566	7.67313	7.69627	7.67878	8.03342	7.81057	7.99095	1.6559	0.262256	1.19935
ILMN_2043615	C17orf90	chromosome 17 open reading frame 90 (C17orf90)	MGC104712	NM_001039842.1	339229	9.08454	8.94398	9.04821	9.19353	9.38068	9.29002	1.65902	0.262495	1.19955
ILMN_1798303	RAET1G	retinoic acid early transcript 1G (RAET1G)		NM_001001788.2	353091	5.53916	5.70321	5.6837	5.85798	5.98641	5.87036	1.68889	0.262897	1.19989
ILMN_1708110	TMEM144	transmembrane protein 144 (TMEM144)	FLJ11155	NM_018342.3	55314	5.66391	5.52982	5.47573	5.75221	5.848	5.85798	1.69598	0.262908	1.19989
ILMN_1903568		cDNA FLJ12874 fis, clone NT2RP2003769			NA	10.0463	10.0154	10.1322	10.3321	10.2688	10.3846	1.91047	0.263843	1.20067
ILMN_1666885	ATRX	alpha thalassemia/mental retardation syndrome X-linked (RAD54 homolog, S. cerevisiae) (ATRX), transcript variant 1	XNP; ZNF-HX; MRXHF1; XH2; ATR2; SFM1; SHS; MRXS3; RAD54L; RAD54; MGC2094	NM_000489.3	546	5.55459	5.46597	5.56071	5.84549	5.73877	5.78921	1.98322	0.264062	1.20086
ILMN_1657332	CCDC85B	coiled-coil domain containing 85B (CCDC85B)	DIPA	NM_006848.2	11007	7.11166	6.98071	6.91528	7.21626	7.32553	7.26209	1.70618	0.265412	1.20198
ILMN_2288928	PPP4R4	protein phosphatase 4, regulatory subunit 4 (PPP4R4), transcript variant 1		NM_058237.1	57718	5.64674	5.55152	5.69766	6.03342	5.79442	5.86542	1.54068	0.265782	1.20229
ILMN_1755366	LOC652730	PREDICTED: hypothetical protein LOC652730 (LOC652730)		XM_945929.1	652730	5.18982	5.24031	5.16591	5.45286	5.49825	5.44294	2.2644	0.266001	1.20247
ILMN_1668446	ABCA9	ATP-binding cassette, sub-family A (ABC1), member 9 (ABCA9)	EST640918; DKFZp686F2450; MGC75415	NM_080283.3	10350	5.79442	5.85798	5.82528	6.10224	6.05528	6.11894	2.29213	0.266263	1.20269
ILMN_3241164	KDSR	3-ketodihydrosphingosine reductase (KDSR)	FLJ92680; FLJ36555; DHSR; FVT1	NM_002035.2	2531	6.23266	6.21335	6.15987	6.62059	6.44128	6.34341	1.53376	0.266466	1.20286
ILMN_1701991	SYNJ1	synaptojanin 1 (SYNJ1), transcript variant 2	INPP5G	NM_203446.1	8867	7.02459	7.01011	7.12516	7.38024	7.18982	7.38974	1.62398	0.266653	1.20301
ILMN_3251269	SRP14	signal recognition particle 14kDa (homologous Alu RNA binding protein) (SRP14)	ALURBP; MGC14326	NM_003134.4	6727	10.1224	10.2029	10.1171	10.5536	10.2931	10.3959	1.56547	0.26673	1.20308
ILMN_2381758	G3BP2	GTPase activating protein (SH3 domain) binding protein 2 (G3BP2), transcript variant 3		NM_203504.1	9908	7.35138	7.54226	7.41616	7.6907	7.69558	7.72451	1.81958	0.266994	1.2033
ILMN_1892638		mRNA; cDNA DKFZp564C152 (from clone DKFZp564C152)			NA	8.93958	8.97671	9.10748	9.23362	9.31606	9.27519	1.83009	0.267034	1.20333
ILMN_1808379	PLCD4	phospholipase C, delta 4 (PLCD4)	MGC12837	NM_032726.2	84812	5.71699	5.78921	5.64674	6.0917	5.99322	5.87036	1.61306	0.26745	1.20368
ILMN_1673941	RBM24	RNA binding motif protein 24 (RBM24)	FLJ37697; RNPC6; FLJ30829; dJ259A10.1; FLJ26355	NM_153020.1	221662	6.22304	6.2384	6.33092	6.52669	6.59395	6.47411	1.93732	0.267467	1.20369
ILMN_2162989	TMEM189	transmembrane protein 189 (TMEM189)	UBE2V1; Kua	NM_199129.1	387521	9.21675	9.1267	9.33762	9.4149	9.50522	9.56339	1.62561	0.267476	1.2037
ILMN_2226304	ANKRD50	ankyrin repeat domain 50 (ANKRD50)	KIAA1223	NM_020337.1	57182	7.12619	7.07361	6.94837	7.35579	7.22497	7.37069	1.67474	0.267761	1.20394
ILMN_2327346	SSBP4	single stranded DNA binding protein 4 (SSBP4), transcript variant 1	MGC3181	NM_032627.2	170463	7.81121	7.62425	7.55536	8.00056	7.91289	7.88081	1.5382	0.267814	1.20398
ILMN_1701655	SLC24A6	solute carrier family 24 (sodium/potassium/calcium exchanger), member 6 (SLC24A6)	FLJ22233; NCLX; NCKX6	NM_024959.2	80024	7.30834	7.34341	7.4822	7.65964	7.71562	7.56301	1.68594	0.268105	1.20422
ILMN_1747934	ISYNA1	inositol-3-phosphate synthase 1 (ISYNA1)	IPS	NM_016368.3	51477	6.17991	6.25927	6.15178	6.54226	6.53294	6.32012	1.58587	0.268121	1.20424
ILMN_3203238	LOC100133669	PREDICTED: similar to hCG1994695 (LOC100133669)		XM_001720809.1	100133669	5.03122	4.94953	5.03122	5.16591	5.32912	5.32193	1.79472	0.26833	1.20441
ILMN_1785330	SH3BP4	SH3-domain binding protein 4 (SH3BP4)	BOG25; TTP	NM_014521.2	23677	9.49566	9.48724	9.434	9.74433	9.63227	9.84596	1.7397	0.268554	1.2046
ILMN_1798975	EGFR	epidermal growth factor receptor (erythroblastic leukemia viral (v-erb-b) oncogene homolog, avian) (EGFR), transcript variant 1	ERBB1; ERBB; mENA	NM_005228.3	1956	6.12516	6.2384	6.15785	6.52042	6.3345	6.47249	1.73544	0.268665	1.20469
ILMN_3217276	LOC644517	PREDICTED: misc_RNA (LOC644517), miscRNA.		XR_037472.1	644517	6.95536	6.93782	6.94017	7.27053	7.19673	7.17293	2.24873	0.268947	1.20493
ILMN_1803811	TRIB1	tribbles homolog 1 (Drosophila) (TRIB1)	GIG2; SKIP1; C8FW	NM_025195.2	10221	7.82909	7.69279	7.62059	7.93192	7.96694	8.05094	1.67874	0.26911	1.20506
ILMN_2117223	ROD1	ROD1 regulator of differentiation 1 (S. pombe) (ROD1)	DKFZp781I1117; PTBP3	NM_005156.4	9991	8.93575	8.98157	8.99379	9.28401	9.13237	9.30241	1.83893	0.269229	1.20516
ILMN_1718265	ATG5	ATG5 autophagy related 5 homolog (S. cerevisiae) (ATG5)	ASP; APG5; hAPG5; APG5L	NM_004849.1	9474	7.24413	7.08852	7.19673	7.38457	7.46679	7.48623	1.85406	0.269405	1.20531
ILMN_1805474	C1orf131	chromosome 1 open reading frame 131 (C1orf131)	DKFZp547B1713	NM_152379.2	128061	7.71218	7.65607	7.76421	7.99887	7.97613	7.96636	2.2032	0.269637	1.2055
ILMN_1754400	AYP1p1	PREDICTED: AYP1 pseudogene 1 (AYP1p1), misc RNA.		XR_001434.1	386608	8.00619	7.98698	8.14262	8.21091	8.36807	8.36588	1.67336	0.269695	1.20555
ILMN_1803073	DNAJC12	DnaJ (Hsp40) homolog, subfamily C, member 12 (DNAJC12), transcript variant 1	RP11-57G10.2; JDP1	NM_021800.2	56521	5.83542	5.82018	5.93782	6.1375	6.08321	6.1819	1.97779	0.269734	1.20559
ILMN_2231928	MX2	myxovirus (influenza virus) resistance 2 (mouse) (MX2)	MXB	NM_002463.1	4600	5.36107	5.41616	5.50462	5.78398	5.63227	5.67525	1.78446	0.269883	1.20571
ILMN_1673360	BDH2	3-hydroxybutyrate dehydrogenase, type 2 (BDH2)	UCPA-OR; DHRS6; FLJ13261; EFA6R; PRO20933; UNQ6308	NM_020139.3	56898	5.16993	5.10434	5.20945	5.32912	5.42626	5.53916	1.71388	0.270277	1.20604
ILMN_1788817	MAGED4B	melanoma antigen family D, 4B (MAGED4B), transcript variant 1	MAGE1; MGC88639; MAGE-E1; MGC3210	NM_030801.2	81557	5.64674	5.83036	5.7761	6.02237	6.02237	6.02015	1.87659	0.270561	1.20628
ILMN_3245707	RIMKLB	ribosomal modification protein rimK-like family member B (RIMKLB)	KIAA1238	NM_020734.2	57494	6.89118	7.14262	6.97957	7.3156	7.24413	7.26866	1.63386	0.271675	1.20721
ILMN_2104696	ERICH1	glutamate-rich 1 (ERICH1)	HSPC319	NM_207332.1	157697	7.51333	7.50144	7.59694	7.78333	7.84987	7.79507	2.15873	0.272186	1.20764
ILMN_1657803	CFH	complement factor H (CFH), transcript variant 2	HUS; MGC88246; HF1; FH; ARMD4; ARMS1; HF; CFHL3; FHL1; HF2	NM_001014975.1	3075	8.54921	8.62205	8.55919	8.91409	8.77643	8.85705	2.00733	0.272374	1.20779
ILMN_1699208	NAP1L1	nucleosome assembly protein 1-like 1 (NAP1L1), transcript variant 1	NAP1; NRP; NAP1L; FLJ16112; MGC23410; MGC8688	NM_139207.1	4673	9.58289	9.596	9.50243	9.91558	9.72247	9.86155	1.76839	0.272756	1.20811
ILMN_1777113	NEURL2	neuralized homolog 2 (Drosophila) (NEURL2)	MGC125935; C20orf163; MGC125934; Ozz-E3	NM_080749.2	140825	5.45615	5.62352	5.54535	5.926	5.76022	5.75756	1.66953	0.272921	1.20825
ILMN_2065299	EDEM3	ER degradation enhancer, mannosidase alpha-like 3 (EDEM3)	C1orf22	NM_025191.2	80267	8.44791	8.51491	8.53955	8.7139	8.75656	8.85081	1.97017	0.272968	1.20829
ILMN_1767448	LHFP	lipoma HMGIC fusion partner (LHFP)		NM_005780.1	10186	8.4818	8.50978	8.50502	8.88478	8.62936	8.80155	1.6506	0.273031	1.20834
ILMN_2070896	BMPR2	bone morphogenetic protein receptor, type II (serine/threonine kinase) (BMPR2)	BRK-3; FLJ76945; BMPR3; BMPR-II; BMR2; TRG10; PPH1; T-ALK	NM_001204.5	659	8.62095	8.7187	8.49346	8.8805	8.86016	8.91169	1.74358	0.273079	1.20838
ILMN_1758906	GNA13	guanine nucleotide binding protein (G protein), alpha 13 (GNA13)	MGC46138; G13	NM_006572.3	10672	8.3097	8.25739	8.18239	8.59544	8.54187	8.43254	1.82028	0.273457	1.2087
ILMN_1661886	APEX1	APEX nuclease (multifunctional DNA repair enzyme) 1 (APEX1), transcript variant 3	APEX; REF1; APE1; APE-1; HAP1; APE; APX; REF-1; APEN	NM_080649.1	328	9.84596	9.78676	9.79442	10.1934	10.0258	10.0293	1.84948	0.273795	1.20898
ILMN_1696003	GNAI3	guanine nucleotide binding protein (G protein), alpha inhibiting activity polypeptide 3 (GNAI3)	FLJ26559; 87U6	NM_006496.1	2773	7.25833	7.13648	7.32193	7.64674	7.44956	7.44294	1.55862	0.274169	1.2093
ILMN_2296950	APOBEC3F	apolipoprotein B mRNA editing enzyme, catalytic polypeptide-like 3F (APOBEC3F), transcript variant 2	KA6; BK150C2.4.MRNA; ARP8; MGC74891	NM_001006666.1	200316	7.86233	7.80735	7.72383	7.93428	8.06878	8.21335	1.52571	0.274297	1.2094
ILMN_1796423	CLIC3	chloride intracellular channel 3 (CLIC3)		NM_004669.2	9022	7.24793	7.36632	7.29186	7.56301	7.57743	7.58871	2.19382	0.274346	1.20945
ILMN_3251733	C19orf43	chromosome 19 open reading frame 43 (C19orf43)	MGC2803	NM_024038.2	79002	9.53275	9.56948	9.50084	9.76454	9.90041	9.76122	1.96447	0.27437	1.20947
ILMN_1791226	NXN	nucleoredoxin (NXN)	TRG-4; FLJ12614	NM_022463.3	64359	6.02901	6.02015	6.08534	6.39746	6.39746	6.1639	1.61449	0.274775	1.20981
ILMN_2166972	BBS12	Bardet-Biedl syndrome 12 (BBS12)	FLJ41559; FLJ35630; C4orf24	NM_152618.2	166379	5.63517	5.52042	5.69209	5.88753	5.87283	5.91169	1.94265	0.274786	1.20981
ILMN_1764871	PIGP	phosphatidylinositol glycan anchor biosynthesis, class P (PIGP), transcript variant 2	DCRC-S; DSCR5; DCRC; DSRC	NM_153682.2	51227	8.89633	8.97413	9.01737	9.22978	9.15051	9.33204	1.79549	0.274833	1.20985
ILMN_1802331	NFATC2IP	PREDICTED: nuclear factor of activated T-cells, cytoplasmic, calcineurin-dependent 2 interacting protein, transcript variant 3 (NFATC2IP)		XM_944125.1	84901	5.16993	5.12102	5.02237	5.3505	5.42291	5.36457	1.98567	0.274889	1.2099
ILMN_1793543	C1orf51	chromosome 1 open reading frame 51 (C1orf51)	FLJ25889	NM_144697.2	148523	6.15583	5.97499	6.24413	6.41447	6.36107	6.42459	1.60543	0.275061	1.21005
ILMN_1690040	TM7SF2	transmembrane 7 superfamily member 2 (TM7SF2)	ANG1; DHCR14A	NM_003273.2	7108	6.46434	6.36632	6.46597	6.65964	6.74685	6.71562	2.09438	0.275157	1.21013
ILMN_1801040	SPN	sialophorin (SPN), transcript variant 1	GPL115; CD43; LSN	NM_001030288.1	6693	5.64962	5.76818	5.75221	6.14975	5.94953	5.89724	1.57292	0.275503	1.21042
ILMN_2367215	PRCP	prolylcarboxypeptidase (angiotensinase C) (PRCP), transcript variant 1	HUMPCP; PCP; MGC2202	NM_005040.2	5547	10.3623	10.4453	10.3192	10.6339	10.6808	10.639	2.12691	0.275621	1.21052
ILMN_1658678	SAAL1	serum amyloid A-like 1 (SAAL1)	FLJ41463	NM_138421.2	113174	7.66107	7.93369	7.80478	8.1236	8.03617	8.06717	1.59885	0.275804	1.21067
ILMN_1716869	GPM6A	glycoprotein M6A (GPM6A), transcript variant 3	GPM6; M6A	NM_201592.1	2823	5.38543	5.34341	5.41278	5.70598	5.75221	5.51096	1.65834	0.275844	1.2107
ILMN_2338116	TRAF5	TNF receptor-associated factor 5 (TRAF5), transcript variant 1	MGC:39780; RNF84	NM_004619.3	7188	6.1416	6.31832	6.35403	6.53761	6.45615	6.64818	1.57008	0.275997	1.21083
ILMN_1756501	ST6GAL1	ST6 beta-galactosamide alpha-2,6-sialyltranferase 1 (ST6GAL1), transcript variant 2	ST6Gal I; SIAT1; ST6GalI; MGC48859; CD75	NM_003032.2	6480	8.01123	7.94837	7.93723	8.37764	8.14873	8.20016	1.69911	0.276572	1.21131
ILMN_1719919	KLHL13	kelch-like 13 (Drosophila) (KLHL13)	BKLHD2; FLJ10262; MGC74791; KIAA1309	NM_033495.2	90293	5.29278	5.54226	5.42626	5.73877	5.65821	5.69488	1.6733	0.276852	1.21155
ILMN_3256471	FAM87A	PREDICTED: family with sequence similarity 87, member A (FAM87A)		XM_001721137.1	157693	5.23649	5.24413	5.29278	5.55766	5.41278	5.63517	1.76439	0.277403	1.21201
ILMN_1660341	LRPAP1	low density lipoprotein receptor-related protein associated protein 1 (LRPAP1)	MGC138272; A2MRAP; RAP; HBP44; A2RAP; MRAP	NM_002337.1	4043	8.88478	8.82972	8.92896	9.13597	9.19697	9.14313	2.23328	0.277533	1.21212
ILMN_1798619	KCTD17	potassium channel tetramerisation domain containing 17 (KCTD17)	FLJ12242	NM_024681.1	79734	5.90689	5.99322	5.95187	6.18388	6.34518	6.15583	1.80568	0.277639	1.21221
ILMN_1662174	ORMDL3	ORM1-like 3 (S. cerevisiae) (ORMDL3)		NM_139280.1	94103	6.76421	6.62498	6.78921	6.94134	7.02459	7.04549	1.85251	0.277673	1.21224
ILMN_2118229	NAPEPLD	N-acyl phosphatidylethanolamine phospholipase D (NAPEPLD)	FMP30; NAPE-PLD; DKFZp781D1098	NM_198990.3	222236	6.97728	6.84549	7.00562	7.17093	7.1809	7.31016	1.77689	0.277865	1.2124
ILMN_1801053	C15orf2	chromosome 15 open reading frame 2 (C15orf2)		NM_018958.2	23742	4.81762	4.8679	4.848	5.24413	5.07895	5.04439	1.81633	0.277985	1.2125
ILMN_3239861	C10orf140	chromosome 10 open reading frame 140 (C10orf140)	FLJ45187; DLN-1; DKFZp761J229	NM_207371.3	387640	5.36107	5.34696	5.19377	5.52042	5.52356	5.69209	1.65812	0.278094	1.21259
ILMN_1741224	GPR137C	G protein-coupled receptor 137C (GPR137C)	TM7SF1L2; DKFZp762F0713	NM_001099652.1	283554	5.38543	5.29646	5.30012	5.64386	5.63227	5.54226	2.09587	0.27879	1.21318
ILMN_2169439	ITGAV	integrin, alpha V (vitronectin receptor, alpha polypeptide, antigen CD51) (ITGAV)	CD51; DKFZp686A08142; VNRA; MSK8	NM_002210.2	3685	10.3789	10.3256	10.2176	10.6005	10.4975	10.6615	1.77623	0.279084	1.21342
ILMN_1762294	ADAMTSL4	ADAMTS-like 4 (ADAMTSL4), transcript variant 2	TSRC1	NM_025008.3	54507	6.67666	6.6837	6.82655	6.98071	6.98071	7.06286	1.91584	0.279123	1.21346
ILMN_1754658	CDRT1	CMT1A duplicated region transcript 1 (CDRT1)	SM25H2; HREP	NM_006382.2	374286	5.22497	5.34696	5.45286	5.6865	5.60585	5.56986	1.70173	0.279141	1.21347
ILMN_2092664	ADSS	adenylosuccinate synthase (ADSS)	ADEH; MGC20404	NM_001126.2	159	9.01067	9.01542	9.06663	9.46332	9.20848	9.25857	1.64544	0.279218	1.21354
ILMN_1820267		UI-E-EJ0-ais-c-13-0-UI.r1 UI-E-EJ0 cDNA clone UI-E-EJ0-ais-c-13-0-UI 5, mRNA sequence			NA	5.16591	5.16591	5.11686	5.57894	5.33985	5.36807	1.67407	0.27939	1.21368
ILMN_1672565	RG9MTD1	RNA (guanine-9-) methyltransferase domain containing 1 (RG9MTD1)	FLJ20432	NM_017819.2	54931	7.60363	7.67525	7.71973	8.05799	7.92244	7.85674	1.76986	0.279518	1.21379
ILMN_3237270	LOC100133609	PREDICTED: similar to membrane-associated ring finger (C3HC4) 3 (LOC100133609)		XM_001720815.1	100133609	9.20726	9.05012	9.09645	9.38586	9.34895	9.45779	1.91203	0.279591	1.21385
ILMN_2192032	SRP19	signal recognition particle 19kDa (SRP19)		NM_003135.1	6728	8.97154	9.04029	9.07361	9.43858	9.22135	9.26468	1.7206	0.279722	1.21396
ILMN_1704385	LOC347376	PREDICTED: similar to H3 histone, family 3B (LOC347376)		XM_937928.1	347376	9.7502	9.59414	9.72247	10.0111	9.85814	10.0373	1.7129	0.279896	1.21411
ILMN_1811264	C15orf57	chromosome 15 open reading frame 57 (C15orf57), transcript variant 2	MGC20481; FLJ25915	NM_052849.2	90416	7.91289	7.93133	7.87958	8.18289	8.25644	8.12464	2.14212	0.280058	1.21424
ILMN_1774604	PNKD	paroxysmal nonkinesiogenic dyskinesia (PNKD), transcript variant 2	FKSG19; KIPP1184; DKFZp564N1362; MR1; FPD1; TAHCCP2; MGC31943; DYT8; KIAA1184; BRP17; MR-1; PDC	NM_022572.2	25953	6.78136	6.72928	6.76951	7.17692	6.91648	7.02791	1.68116	0.280385	1.21452
ILMN_1670752	KIAA0907	KIAA0907 (KIAA0907)	RP11-336K24.1	NM_014949.2	22889	7.7662	7.91707	7.88996	8.23218	8.03287	8.15076	1.71367	0.280862	1.21492
ILMN_1720024	IL11RA	interleukin 11 receptor, alpha (IL11RA), transcript variant 1	MGC2146	NM_004512.3	3590	5.57289	5.63227	5.79961	5.98185	5.95884	5.90689	1.74376	0.280941	1.21499
ILMN_1743677	HNRNPU	heterogeneous nuclear ribonucleoprotein U (scaffold attachment factor A) (HNRNPU), transcript variant 1	SAF-A; U21.1; HNRPU; HNRNPU	NM_031844.2	3192	6.62644	6.6453	6.69209	6.97039	6.84423	6.99322	2.00987	0.28134	1.21532
ILMN_1657373	LEPREL1	leprecan-like 1 (LEPREL1)	FLJ10718; MLAT4; P3H2	NM_018192.2	55214	8.1416	8.1467	8.19032	8.48905	8.41405	8.41954	2.37678	0.281341	1.21532
ILMN_1679324	EIF1B	eukaryotic translation initiation factor 1B (EIF1B)	GC20	NM_005875.2	10289	9.6779	9.8989	9.92199	10.1375	10.0337	10.1724	1.58243	0.281613	1.21555
ILMN_2285141	USP48	ubiquitin specific peptidase 48 (USP48), transcript variant 1	RAP1GA1; MGC132556; USP31; DKFZp762M1713; MGC14879	NM_032236.5	84196	6.54226	6.59694	6.68229	7.00899	6.77479	6.88264	1.66944	0.281644	1.21558
ILMN_1661500	B4GALT4	UDP-Gal:betaGlcNAc beta 1,4- galactosyltransferase, polypeptide 4 (B4GALT4), transcript variant 2	B4Gal-T4; beta4Gal-T4	NM_003778.3	8702	8.72315	8.74853	8.51688	8.91019	8.89482	9.02873	1.61553	0.281729	1.21565
ILMN_1706598	ACPL2	acid phosphatase-like 2 (ACPL2)	FLJ23751	NM_152282.2	92370	5.926	6.15987	6.03122	6.35226	6.33628	6.27426	1.74668	0.281907	1.2158
ILMN_1709486	SRPX	sushi-repeat-containing protein, X-linked (SRPX)	DRS; ETX1	NM_006307.3	8406	11.335	11.3683	11.2982	11.6254	11.7091	11.513	1.87961	0.281976	1.21586
ILMN_2067852	SLC30A1	solute carrier family 30 (zinc transporter), member 1 (SLC30A1)	ZNT1; ZRC1	NM_021194.2	7779	6.6279	6.69627	6.83794	7.08852	6.98868	6.93192	1.69413	0.282338	1.21616
ILMN_1809931	NDRG1	N-myc downstream regulated gene 1 (NDRG1)	CMT4D; GC4; RTP; RIT42; PROXY1; NMSL; NDR1; TDD5; TARG1; CAP43; HMSNL; DRG1	NM_006096.2	10397	9.36632	9.47046	9.35931	9.7949	9.5889	9.65982	1.7656	0.282512	1.21631
ILMN_1732923	SIPA1L2	signal-induced proliferation-associated 1 like 2 (SIPA1L2)	SPAL2; FLJ23126; KIAA1389; FLJ23632	NM_020808.3	57568	5.56682	5.43962	5.38543	5.76022	5.76818	5.71149	1.93206	0.282677	1.21645
ILMN_1669215	SRPK2	SFRS protein kinase 2 (SRPK2), transcript variant 1	FLJ36101; SFRSK2	NM_182692.1	6733	6.54226	6.53294	6.44626	6.9472	6.65678	6.76553	1.57253	0.282687	1.21646
ILMN_1743933	TSHZ3	teashirt zinc finger homeobox 3 (TSHZ3)	ZNF537; TSH3; KIAA1474	NM_020856.2	57616	6.97842	7.12516	7.10014	7.45943	7.25739	7.33539	1.72492	0.282831	1.21658
ILMN_1810433	LOC652545	PREDICTED: similar to Protein C21orf70 homolog (LOC652545)		XM_942035.1	652545	7.26866	7.24317	7.1179	7.47086	7.61176	7.39575	1.68064	0.282879	1.21662
ILMN_1657683	C1orf198	chromosome 1 open reading frame 198 (C1orf198)	FLJ14525; FLJ16283; DKFZp667D152; MGC10710; FLJ38847	NM_032800.1	84886	8.47533	8.44791	8.35359	8.64638	8.75054	8.72894	2.04551	0.283011	1.21673
ILMN_1684054	ASAH1	N-acylsphingosine amidohydrolase (acid ceramidase) 1 (ASAH1), transcript variant 1	AC; FLJ22079; FLJ21558; PHP32; ASAH; PHP	NM_177924.2	427	6.46597	6.32553	6.36982	6.56071	6.69627	6.75355	1.76556	0.283073	1.21678
ILMN_1737360	TSPYL3	PREDICTED: TSPY-like 3 (pseudogene) (TSPYL3), misc RNA.		XR_001421.1	128854	5.90448	6.06393	6.02459	6.26303	6.20163	6.37851	1.7675	0.283392	1.21705
ILMN_2144162	FLJ25006	uncharacterized serine/threonine-protein kinase SgK494 (FLJ25006)	MGC39533	NM_144610.1	124923	5.2854	5.19771	5.20163	5.54535	5.52042	5.46923	2.2487	0.283421	1.21708
ILMN_2148452	BCAS2	breast carcinoma amplified sequence 2 (BCAS2)	DAM1	NM_005872.2	10286	6.60585	6.70321	6.69349	7.12516	6.83542	6.89239	1.54411	0.283472	1.21712
ILMN_2410772	KEAP1	kelch-like ECH-associated protein 1 (KEAP1), transcript variant 2	MGC9454; MGC10630; KLHL19; MGC20887; MGC4407; KIAA0132; INrf2; MGC1114	NM_012289.3	9817	8.02791	8.1334	8.04821	8.33539	8.4822	8.2427	1.70266	0.283591	1.21722
ILMN_1782273	N4BP2	Nedd4 binding protein 2 (N4BP2)	B3BP; KIAA1413; FLJ10680	NM_018177.2	55728	5.23649	5.33985	5.41616	5.66959	5.62936	5.54535	1.85155	0.283931	1.21751
ILMN_2151281	GABARAPL1	GABA(A) receptor-associated protein like 1 (GABARAPL1)	ATG8L; GEC1; APG8L; ATG8	NM_031412.2	23710	9.1814	9.17518	9.18809	9.50978	9.37829	9.50859	2.12736	0.283996	1.21756
ILMN_3295874	LOC100132805	PREDICTED: similar to predicted protein (LOC100132805)		XM_001719188.1	100132805	8.2384	8.30925	8.2182	8.40769	8.52356	8.6872	1.62069	0.284201	1.21774
ILMN_3299558	SFRS18	splicing factor, arginine/serine-rich 18 (SFRS18), transcript variant 2	DKFZp564B0769; FLJ90147; SRrp130; MGC104269; C6orf111; bA98I9.2; RP11-98I9.2; HSPC306; FLJ14752; FLJ14992; FLJ14853	NM_015491.1	25957	6.51254	6.40259	6.61324	6.89845	6.65535	6.82782	1.54477	0.284418	1.21792
ILMN_1793378	KCTD16	potassium channel tetramerisation domain containing 16 (KCTD16)	KIAA1317; DKFZp781A1155; MGC138167	NM_020768.2	57528	5.79961	5.93782	5.70321	6.1334	6.04658	6.11478	1.74963	0.28471	1.21817
ILMN_1723212	SFRS3	splicing factor, arginine/serine-rich 3 (SFRS3)	SRp20	NM_003017.3	6428	7.89421	7.78398	8.0207	8.2114	8.10381	8.23793	1.68045	0.284749	1.2182
ILMN_3227263	SLC22A23	solute carrier family 22, member 23 (SLC22A23), transcript variant 1		NM_015482.1	63027	8.03012	7.92541	7.96867	8.23074	8.41066	8.1375	1.62398	0.284907	1.21833
ILMN_1809537	MASP1	mannan-binding lectin serine peptidase 1 (C4/C2 activating component of Ra-reactive factor) (MASP1), transcript variant 2	MASP; DKFZp686I01199; CRARF1; PRSS5; CRARF; MGC126283; FLJ26383; MGC126284; RaRF	NM_139125.2	5648	5.21723	5.10014	5.10434	5.51412	5.25172	5.51096	1.54292	0.285033	1.21844
ILMN_1690822	VAPA	VAMP (vesicle-associated membrane protein)-associated protein A, 33kDa (VAPA), transcript variant 1	hVAP-33; VAP33; VAP-33; VAP-A; MGC3745	NM_003574.4	9218	5.65249	5.67243	5.77083	5.91409	6	6.03782	2.01746	0.285389	1.21874
ILMN_2270845	WDR74	WD repeat domain 74 (WDR74)	FLJ10439; FLJ21730	NM_018093.1	54663	6.03342	6.06824	6.04002	6.2724	6.35755	6.36807	2.34308	0.285446	1.21879
ILMN_3259146	LOC100129681	PREDICTED: similar to NPC-A-7 (LOC100129681)		XM_001726834.1	100129681	9.3226	9.44956	9.5744	9.60326	9.783	9.8173	1.51833	0.285662	1.21897
ILMN_1723020	MAP3K1	mitogen-activated protein kinase kinase kinase 1 (MAP3K1)	MAPKKK1; MEKK1; MEKK	NM_005921.1	4214	6.21529	6.41616	6.24793	6.66959	6.50779	6.55919	1.69936	0.285731	1.21903
ILMN_1758599	FAM163A	family with sequence similarity 163, member A (FAM163A)	MGC16664; RP11-12M5.2; NDSP	NM_173509.2	148753	8.10905	8.08108	7.95303	8.24935	8.41574	8.33539	1.81283	0.285773	1.21906
ILMN_1713058	PSTPIP2	proline-serine-threonine phosphatase interacting protein 2 (PSTPIP2)	MGC34175; MAYP	NM_024430.2	9050	7.42291	7.46679	7.45697	7.78333	7.66035	7.76089	2.20333	0.285966	1.21923
ILMN_1694147	PUS3	pseudouridylate synthase 3 (PUS3)	FKSG32; 2610020J05Rik; FLJ23638	NM_031307.2	83480	7.20457	7.32193	7.11374	7.52982	7.40088	7.56834	1.69973	0.286265	1.21948
ILMN_1700202	TMEM135	transmembrane protein 135 (TMEM135)	FLJ22104; DKFZp686I1974	NM_022918.2	65084	6.32193	6.16792	6.26115	6.62936	6.3906	6.59096	1.62656	0.286638	1.21979
ILMN_2047599	TMEM50B	transmembrane protein 50B (TMEM50B)	C21orf4; HCVP7TP3; DKFZp686C2482	NM_006134.5	757	8.2384	8.23554	8.32598	8.52239	8.5932	8.54458	2.27549	0.286749	1.21989
ILMN_1741171	TM2D2	TM2 domain containing 2 (TM2D2), transcript variant 1	MGC125814; BLP1; MGC125813	NM_078473.2	83877	7.3966	7.40684	7.41701	7.71425	7.64241	7.72451	2.46913	0.286905	1.22002
ILMN_1753885	YTHDF1	YTH domain family, member 1 (YTHDF1)	C20orf21; FLJ20391	NM_017798.2	54915	8.38198	8.32912	8.46761	8.78725	8.59432	8.65821	1.80144	0.287027	1.22012
ILMN_1737398	PTPLAD1	protein tyrosine phosphatase-like A domain containing 1 (PTPLAD1)	B-IND1; HSPC121; FLJ90376	NM_016395.2	51495	9.87636	10.0268	9.99124	10.359	10.2019	10.1951	1.79617	0.287195	1.22027
ILMN_1715991	SDPR	serum deprivation response (phosphatidylserine binding protein) (SDPR)	SDR; PS-p68	NM_004657.4	8436	7.11686	7.06501	7.22497	7.49185	7.35755	7.42122	1.91016	0.287929	1.22089
ILMN_1739210	NSL1	NSL1, MIND kinetochore complex component, homolog (S. cerevisiae) (NSL1), transcript variant 2	MIS14; C1orf48; DKFZP566O1646; DC8	NM_001042549.1	25936	8.98755	9.08507	8.95739	9.37916	9.20335	9.31152	1.87276	0.288005	1.22095
ILMN_1804798	BEXL1	PREDICTED: brain expressed X-linked-like 1 (BEXL1)		XM_936467.2	56271	7.29002	7.52278	7.45861	7.71836	7.71699	7.70044	1.80808	0.288128	1.22105
ILMN_1712027	RSBN1L	round spermatid basic protein 1-like (RSBN1L)	FLJ45813; FLJ42526; MGC71764	NM_198467.1	222194	6.2384	6.32733	6.41785	6.70183	6.54844	6.59842	1.8201	0.288367	1.22126
ILMN_1751276	BDNF	brain-derived neurotrophic factor (BDNF), transcript variant 4	MGC34632	NM_001709.3	627	9.45348	9.47513	9.26913	9.63517	9.75856	9.66977	1.75237	0.288591	1.22145
ILMN_1755792	STK38L	serine/threonine kinase 38 like (STK38L)	NDR2; KIAA0965	NM_015000.2	23012	6.07682	6.03342	6.24982	6.52826	6.28355	6.41447	1.54826	0.28874	1.22157
ILMN_1665357	EPS15	epidermal growth factor receptor pathway substrate 15 (EPS15), transcript variant 1	AF1P; MLLT5; AF-1P	NM_001981.2	2060	6.58496	6.61912	6.62644	7.02459	6.76686	6.90569	1.74788	0.288871	1.22168
ILMN_3237991	LOC645166	PREDICTED: similar to lymphocyte-specific protein 1 (LOC645166)		XM_001129441.2	645166	10.6707	10.5022	10.6977	10.9084	10.901	10.9289	1.90998	0.289219	1.22198
ILMN_1690844	LOC387820	PREDICTED: similar to DnaJ (Hsp40) homolog, subfamily B, member 6 isoform a (LOC387820)		XR_019393.1	387820	10.6548	10.7132	10.6374	10.8748	10.9848	11.0137	2.09894	0.289291	1.22204
ILMN_1728724	IL17RA	interleukin 17 receptor A (IL17RA)	IL-17RA; hIL-17R; CD217; MGC10262; CDw217; IL17R	NM_014339.4	23765	6.56986	6.45121	6.31832	6.81634	6.64241	6.74953	1.62464	0.289636	1.22233
ILMN_1745271	EXOSC4	exosome component 4 (EXOSC4)	Rrp41p; p12A; FLJ20591; hRrp41p; Ski6p; RRP41A; SKI6; RRP41	NM_019037.2	54512	7.45039	7.41532	7.58045	7.84046	7.73877	7.73606	1.9242	0.289714	1.2224
ILMN_2306955	ACPL2	acid phosphatase-like 2 (ACPL2), transcript variant 1	FLJ23751	NM_152282.3	92370	6.14771	6.22497	6.30743	6.49346	6.43463	6.62205	1.79303	0.290009	1.22265
ILMN_1705111	FNDC3A	fibronectin type III domain containing 3A (FNDC3A), transcript variant 1	KIAA0970; bA203I16.5; FNDC3; RP11-203I16.5; bA203I16.1; FLJ31509	NM_001079673.1	22862	8.2738	8.20701	8.33584	8.43379	8.53216	8.7211	1.59547	0.290136	1.22276
ILMN_1756572	COQ2	coenzyme Q2 homolog, prenyltransferase (yeast) (COQ2)	CL640; FLJ26072	NM_015697.6	27235	8.32957	8.44087	8.2341	8.66391	8.60696	8.60474	1.90379	0.290358	1.22294
ILMN_2294976	RNASE4	ribonuclease, RNase A family, 4 (RNASE4), transcript variant 1	RNS4; MGC9306	NM_194430.1	6038	6.97957	6.89603	6.7761	7.05745	7.16189	7.30378	1.59296	0.290472	1.22304
ILMN_1672596	BCAR1	breast cancer anti-estrogen resistance 1 (BCAR1)	P130Cas; CRKAS; CAS	NM_014567.2	9564	8.07575	7.93015	8.1236	8.36807	8.34518	8.28771	1.90359	0.29049	1.22306
ILMN_1653115	ECH1	enoyl Coenzyme A hydratase 1, peroxisomal (ECH1)	HPXEL	NM_001398.2	1891	9.09882	9.10669	9.04248	9.28494	9.52101	9.31356	1.74177	0.290506	1.22307
ILMN_2357382	TERF1	telomeric repeat binding factor (NIMA-interacting) 1 (TERF1), transcript variant 2	t-TRF1; TRBF1; FLJ41416; TRF; hTRF1-AS; PIN2; TRF1	NM_003218.2	7013	5.80219	5.92125	5.99774	6.20555	6.1918	6.19574	1.9805	0.290636	1.22318
ILMN_1686968	ZNF362	zinc finger protein 362 (ZNF362)	RP11-415J8.1; MGC138318	NM_152493.2	149076	7.52042	7.45697	7.30469	7.63227	7.80478	7.71699	1.7016	0.29065	1.22319
ILMN_1659782	STK19	serine/threonine kinase 19 (STK19), transcript variant 1	RP1; G11; D6S60; HLA-RP1; MGC117388; D6S60E	NM_004197.1	8859	8.08002	8.06016	7.94895	8.32418	8.39874	8.2384	1.91998	0.290735	1.22326
ILMN_1713978	SDF2	stromal cell-derived factor 2 (SDF2)		NM_006923.2	6388	9.33561	9.50918	9.51017	9.85206	9.64043	9.73522	1.6715	0.290913	1.22341
ILMN_1791494	SYNPO2	PREDICTED: synaptopodin 2, transcript variant 4 (SYNPO2)		XM_942780.2	171024	6.01569	6.23266	5.95652	6.34518	6.37678	6.35579	1.67064	0.290959	1.22345
ILMN_2310896	NLRP3	NLR family, pyrin domain containing 3 (NLRP3), transcript variant 1	AII/AVP; AGTAVPRL; PYPAF1; NALP3; MWS; CIAS1; C1orf7; FCU; FCAS; AVP; AII; CLR1.1	NM_004895.3	114548	5.50144	5.36457	5.38198	5.73335	5.72792	5.66107	2.10279	0.291451	1.22387
ILMN_2370296	ENAH	enabled homolog (Drosophila) (ENAH), transcript variant 2	NDPP1; MENA	NM_018212.4	55740	6.10643	6.11894	6.23649	6.41954	6.44791	6.47086	2.18489	0.292148	1.22446
ILMN_1652505	APEX2	APEX nuclease (apurinic/apyrimidinic endonuclease) 2 (APEX2), nuclear gene encoding mitochondrial protein	XTH2; APEXL2; APE2	NM_014481.2	27301	8.20555	8.13083	8.10852	8.49945	8.46761	8.35491	2.05212	0.292354	1.22464
ILMN_1668283	HYAL2	hyaluronoglucosaminidase 2 (HYAL2), transcript variant 1	LuCa-2; LUCA2	NM_003773.2	8692	7.71356	7.50303	7.66747	7.83036	8.02569	7.90509	1.66807	0.29236	1.22464
ILMN_2300186	DYNLL1	dynein, light chain, LC8-type 1 (DYNLL1), transcript variant 1	PIN; DLC1; MGC126137; DLC8; DNCL1; MGC126138; LC8a; hdlc1; LC8; DNCLC1	NM_001037494.1	8655	11.4038	11.3507	11.4114	11.7616	11.5112	11.7708	1.65445	0.292606	1.22485
ILMN_2079098	C9orf80	chromosome 9 open reading frame 80 (C9orf80)	HSPC043; RP11-276E15.2	NM_021218.1	58493	10.1076	10.2251	10.1923	10.5822	10.4356	10.3853	1.84829	0.292712	1.22494
ILMN_2215194	GCLC	glutamate-cysteine ligase, catalytic subunit (GCLC)	GCS; GLCLC; GLCL	NM_001498.2	2729	5.22882	5.06609	5.21723	5.30378	5.51412	5.57289	1.56817	0.292885	1.22509
ILMN_1758057	TOR1AIP2	torsin A interacting protein 2 (TOR1AIP2)	MGC126581; RP11-12M5.5; LULL1; MGC138430	NM_145034.2	163590	6.31288	6.24031	6.16993	6.52513	6.45943	6.61765	1.93512	0.29303	1.22521
ILMN_1732722	TRNAU1AP	tRNA selenocysteine 1 associated protein 1 (TRNAU1AP), transcript variant 2, transcribed RNA.	SECP43; RP4-669K10.4; PRO1902; FLJ20503	NR_003109.1	54952	5.56682	5.55152	5.47249	5.9542	5.85549	5.66107	1.62371	0.293311	1.22545
ILMN_1732089	MRI1	methylthioribose-1-phosphate isomerase homolog (S. cerevisiae) (MRI1), transcript variant 1		NM_001031727.2	84245	8.06555	8.22641	8.07146	8.48663	8.37112	8.38586	1.9093	0.293398	1.22552
ILMN_1692588	C14orf125	PREDICTED: chromosome 14 open reading frame 125 (C14orf125)		XM_113763.7	25938	6.42962	6.49025	6.42459	6.86047	6.69488	6.66959	1.9161	0.293496	1.22561
ILMN_2097259	CYP2U1	cytochrome P450, family 2, subfamily U, polypeptide 1 (CYP2U1)	P450TEC	NM_183075.2	113612	6.57137	6.53138	6.55152	6.86171	6.71425	6.95884	1.81464	0.293508	1.22562
ILMN_1755120	MAN1A2	mannosidase, alpha, class 1A, member 2 (MAN1A2)	MAN1B	NM_006699.3	10905	6.59096	6.49825	6.47249	6.80219	6.79961	6.84046	2.29258	0.293521	1.22563
ILMN_1660864	RHBDL1	rhomboid, veinlet-like 1 (Drosophila) (RHBDL1)	RRP; RHBDL	NM_003961.1	9028	5.32553	5.32193	5.2817	5.62352	5.48864	5.69766	1.92518	0.293555	1.22566
ILMN_1796138	BMX	BMX non-receptor tyrosine kinase (BMX)	PSCTK2; PSCTK3; ETK	NM_001721.4	660	5.31107	5.47897	5.24031	5.65821	5.52042	5.73335	1.59694	0.293878	1.22593
ILMN_1767441	FBXL14	F-box and leucine-rich repeat protein 14 (FBXL14)	MGC40195; Fbl14	NM_152441.1	144699	5.25927	5.04876	5.16591	5.56986	5.37504	5.41278	1.68374	0.294578	1.22653
ILMN_1722953	USP47	ubiquitin specific peptidase 47 (USP47)	TRFP; DKFZp686C13257; FLJ20727	NM_017944.3	55031	6.24982	6.1639	6.22882	6.52669	6.3733	6.62644	1.75649	0.29463	1.22657
ILMN_1793732	FARS2	phenylalanyl-tRNA synthetase 2, mitochondrial (FARS2), nuclear gene encoding mitochondrial protein	dJ520B18.2; FARS1; HSPC320; PheRS	NM_006567.3	10667	7.6279	7.55459	7.64674	7.93015	7.93133	7.85237	2.30225	0.294874	1.22678
ILMN_1662166	PTK7	PTK7 protein tyrosine kinase 7 (PTK7), transcript variant PTK7-4	CCK4	NM_152882.2	5754	6.13134	5.94953	6.07682	6.29094	6.29278	6.45943	1.76413	0.295154	1.22702
ILMN_1760617	IFT80	intraflagellar transport 80 homolog (Chlamydomonas) (IFT80)	WDR56; MGC126543; KIAA1374	NM_020800.1	57560	5.42291	5.40939	5.63807	5.71699	5.86542	5.77347	1.68199	0.295171	1.22703
ILMN_1771627	ZMIZ1	zinc finger, MIZ-type containing 1 (ZMIZ1)	MIZ; Zimp10; FLJ13541; hZIMP10; KIAA1224; RAI17	NM_020338.2	57178	9.13391	9.22424	9.16088	9.62589	9.40472	9.37417	1.70257	0.295247	1.2271
ILMN_2307861	COL6A3	collagen, type VI, alpha 3 (COL6A3), transcript variant 1	DKFZp686K04147; FLJ34702; DKFZp686D23123	NM_004369.2	1293	9.16164	9.09276	9.1472	9.53352	9.22593	9.52845	1.52646	0.295437	1.22726
ILMN_1699503	UBE2D2	ubiquitin-conjugating enzyme E2D 2 (UBC4/5 homolog, yeast) (UBE2D2), transcript variant 1	UBCH5B; PUBC1; E2(17)KB2; UBC4; UBC4/5	NM_003339.2	7322	7.39575	7.60066	7.49025	7.86728	7.65535	7.85112	1.64317	0.2957	1.22748
ILMN_3243324	FLJ35024	hypothetical LOC401491 (FLJ35024), non-coding RNA.		NR_015375.1	401491	6.57743	6.44791	6.56986	6.69766	6.82018	6.96463	1.6659	0.295759	1.22753
ILMN_3251085	RBBP4	retinoblastoma binding protein 4 (RBBP4), transcript variant 2		NM_001135255.1	5928	6.69488	6.83542	6.77742	7.18884	6.93782	7.06932	1.71265	0.296083	1.22781
ILMN_1774380	LOC650898	PREDICTED: similar to Hermansky-Pudlak syndrome 1 protein isoform b (LOC650898)		XM_939987.1	650898	5.91169	5.78921	5.58796	6.0045	6.03342	6.13955	1.53776	0.296204	1.22791
ILMN_1786823	ICAM2	intercellular adhesion molecule 2 (ICAM2), transcript variant 1	CD102	NM_001099786.1	3384	5.96347	6.04002	6.07039	6.35579	6.33628	6.27053	2.26729	0.296242	1.22794
ILMN_1656915	PSD3	pleckstrin and Sec7 domain containing 3 (PSD3), transcript variant 1	EFA6R; DKFZp761K1423; HCA67	NM_015310.3	23362	5.56986	5.44294	5.40599	5.91169	5.73606	5.66107	1.65715	0.296676	1.22831
ILMN_3247082	FAM150B	family with sequence similarity 150, member B (FAM150B)	RGPG542; PRO1097	NM_001002919.2	285016	6.46271	6.69627	6.75489	7.02569	6.90448	6.87406	1.55998	0.29679	1.22841
ILMN_1691849	LIN7C	lin-7 homolog C (C. elegans) (LIN7C)	LIN-7C; MALS-3; FLJ11215; VELI3; LIN-7-C	NM_018362.2	55327	5.26303	5.40259	5.37504	5.81506	5.61471	5.50144	1.55547	0.296851	1.22846
ILMN_1800253	ZNF711	zinc finger protein 711 (ZNF711)	Zfp711; CMPX1; dJ75N13.1; ZNF5; ZNF4; ZNF6	NM_021998.4	7552	5.00899	5.05745	5.18587	5.34696	5.26303	5.53294	1.60182	0.296875	1.22848
ILMN_2094875	ABCB1	ATP-binding cassette, sub-family B (MDR/TAP), member 1 (ABCB1)	PGY1; MGC163296; GP170; ABC20; CD243; P-gp; MDR1; CLCS	NM_000927.3	5243	5.14975	5.36457	5.24413	5.55459	5.48864	5.60585	1.84939	0.296879	1.22848
ILMN_1801586	HGF	hepatocyte growth factor (hepapoietin A; scatter factor) (HGF), transcript variant 1	F-TCF; HGFB; HPTA; SF	NM_000601.4	3082	5.1334	5.24413	5.17393	5.59395	5.50144	5.34696	1.76052	0.296965	1.22856
ILMN_2396996	PPCS	phosphopantothenoylcysteine synthetase (PPCS), transcript variant 2	MGC138220; FLJ11838; RP11-163G10.1; MGC117357	NM_001077447.1	79717	9.26913	9.19599	9.2353	9.65392	9.32778	9.60973	1.5308	0.297007	1.22859
ILMN_1715543	ACOT1	acyl-CoA thioesterase 1 (ACOT1)	LACH2; ACH2; CTE-1	NM_001037161.1	641371	7.32012	7.40769	7.30195	7.52669	7.81634	7.57894	1.61085	0.297403	1.22893
ILMN_1730294	INO80C	INO80 complex subunit C (INO80C), transcript variant 2	hIes6; FLJ38183	NM_194281.3	125476	7.15987	7.17692	7.30743	7.52982	7.48543	7.52121	2.1512	0.297412	1.22894
ILMN_1658015	MBNL2	muscleblind-like 2 (Drosophila) (MBNL2), transcript variant 1	MGC120628; MBLL39; MGC120626; MBLL; RP11-128N14.1; DKFZp781H1296; PRO2032; MGC120625	NM_144778.2	10150	9.33762	9.43692	9.47998	9.60103	9.76039	9.78545	1.84514	0.297448	1.22897
ILMN_1754798	KSR1	kinase suppressor of ras 1 (KSR1)	RSU2; KSR	NM_014238.1	8844	5.71973	5.56986	5.59096	5.91648	5.84549	6.01123	1.89788	0.297549	1.22905
ILMN_1761762	C6orf141	chromosome 6 open reading frame 141 (C6orf141)	MGC46457	NM_153344.1	135398	5.63227	5.47573	5.64097	5.97269	5.78398	5.88509	1.79031	0.297597	1.2291
ILMN_2203896	SMAD7	SMAD family member 7 (SMAD7)	FLJ16482; MADH8; MADH7	NM_005904.2	4092	7.78333	7.8505	7.98356	8.13494	8.18686	8.18884	1.97009	0.297748	1.22922
ILMN_1731374	CPE	carboxypeptidase E (CPE)		NM_001873.1	1363	5.6865	5.8125	5.83542	6.11894	5.89966	6.20945	1.54605	0.297879	1.22934
ILMN_2345319	PREPL	prolyl endopeptidase-like (PREPL), transcript variant C	FLJ16627; KIAA0436	NM_006036.3	9581	7.25456	7.2114	7.01681	7.43546	7.40684	7.5345	1.7283	0.298012	1.22945
ILMN_1688730	DNAJC18	DnaJ (Hsp40) homolog, subfamily C, member 18 (DNAJC18)	MGC29463	NM_152686.2	202052	6.11061	6.2891	6.40429	6.48543	6.62936	6.58346	1.61035	0.298081	1.22951
ILMN_1701837	KLHL2	kelch-like 2, Mayven (Drosophila) (KLHL2)	ABP-KELCH; MAV; MAYVEN	NM_007246.2	11275	7.07361	7.24222	7.19574	7.49905	7.50383	7.40344	1.99251	0.298248	1.22965
ILMN_1802027	MGST2	microsomal glutathione S-transferase 2 (MGST2)	MGC14097; MGST-II; GST2; FLJ27438	NM_002413.3	4258	9.36829	9.35535	9.30172	9.63771	9.5744	9.70943	2.23409	0.298727	1.23006
ILMN_1804663	THBS3	thrombospondin 3 (THBS3)	MGC119564; TSP3; MGC119565	NM_007112.3	7059	7.54381	7.50224	7.60733	7.80607	7.83542	7.90809	2.25022	0.298736	1.23007
ILMN_2351466	NTM	neurotrimin (NTM), transcript variant 2	MGC60329; NTM	NM_001048209.1	50863	8.43754	8.50224	8.35755	8.63263	8.7761	8.78496	1.93488	0.298789	1.23011
ILMN_1664216	NKIRAS1	NFKB inhibitor interacting Ras-like 1 (NKIRAS1)	KBRAS1; kappaB-Ras1	NM_020345.3	28512	7.96867	7.98185	8.13083	8.40301	8.20604	8.36894	1.76129	0.298882	1.23019
ILMN_2367818	CD40	CD40 molecule, TNF receptor superfamily member 5 (CD40), transcript variant 2	CDW40; TNFRSF5; p50; MGC9013; Bp50	NM_152854.2	958	5.7866	5.99548	5.79961	6.10014	6.14975	6.22882	1.79079	0.299005	1.2303
ILMN_1758457	TBC1D16	TBC1 domain family, member 16 (TBC1D16)	FLJ20748; MGC25062	NM_019020.2	125058	7.07682	6.79181	6.95768	7.23554	7.28448	7.20359	1.703	0.299098	1.23037
ILMN_3256478	LOC100129034	PREDICTED: hypothetical protein LOC100129034 (LOC100129034)		XM_001720357.1	100129034	6.73471	6.6837	6.64962	7.0268	7.00225	6.93664	2.37	0.299223	1.23048
ILMN_1662848	TXNDC15	thioredoxin domain containing 15 (TXNDC15)	FLJ22625; C5orf14; UNQ335	NM_024715.3	79770	7.52278	7.62498	7.63445	7.75756	7.96982	7.95361	1.79698	0.299595	1.2308
ILMN_1801443	TSKU	tsukushin (TSKU)	LRRC54; TSK; E2IG4	NM_015516.3	25987	8.2484	8.14771	8.20555	8.65356	8.49506	8.35359	1.65727	0.30018	1.2313
ILMN_1761322	FHOD3	formin homology 2 domain containing 3 (FHOD3)	Formactin2; FHOS2	NM_025135.2	80206	6.26866	6.28355	6.39403	6.59694	6.63081	6.61912	2.30079	0.300208	1.23132
ILMN_1784299	C19orf43	chromosome 19 open reading frame 43 (C19orf43)	MGC2803	NM_024038.2	79002	10.1016	10.1433	9.9928	10.4064	10.4076	10.3256	2.11559	0.300671	1.23172
ILMN_1802631	AGA	aspartylglucosaminidase (AGA)	AGU; ASRG; GA	NM_000027.2	175	6.8679	7.04221	7.01458	7.34607	7.18982	7.29094	1.87303	0.300718	1.23176
ILMN_2088124	TMEM154	transmembrane protein 154 (TMEM154)	FLJ32028	NM_152680.1	201799	7.75822	7.90087	7.92481	8.32373	8.06286	8.10014	1.61493	0.30094	1.23195
ILMN_1658639	SLC46A3	solute carrier family 46, member 3 (SLC46A3)	FLJ42613; FKSG16; RP11-97E23.2	NM_181785.2	283537	6.58646	6.53294	6.45943	6.94369	6.74147	6.79701	1.8775	0.30111	1.23209
ILMN_1718832	SPHAR	S-phase response (cyclin-related) (SPHAR)	RP4-803J11.4; MGC88280	NM_006542.2	10638	6.61029	6.6279	6.61618	6.83668	6.95187	6.96924	2.28791	0.301142	1.23212
ILMN_2130635	FOXRED2	FAD-dependent oxidoreductase domain containing 2 (FOXRED2)	FLJ33734; FLJ23322	NM_024955.4	80020	6.08108	6.01123	6.00899	6.2854	6.39746	6.32193	2.31107	0.301164	1.23214
ILMN_1656194	TSPAN10	tetraspanin 10 (TSPAN10)	OCSP; FLJ39607	NM_031945.3	83882	5.52669	5.59395	5.48864	5.853	5.86542	5.79442	2.36248	0.301183	1.23215
ILMN_1796484	LOC647250	PREDICTED: hypothetical LOC647250 (LOC647250)		XM_930297.1	647250	5.14568	5.11686	5.10852	5.52982	5.42291	5.32193	1.99765	0.301196	1.23217
ILMN_1815673	DKK3	dickkopf homolog 3 (Xenopus laevis) (DKK3), transcript variant 1	REIC	NM_015881.5	27122	12.0248	12.0483	12.0669	12.4154	12.3445	12.2841	2.32575	0.301326	1.23228
ILMN_1740960	MACROD1	MACRO domain containing 1 (MACROD1)	LRP16	NM_014067.2	28992	5.81506	5.78921	5.8125	5.98868	6.25739	6.07468	1.77922	0.301327	1.23228
ILMN_1652754	ZNF428	zinc finger protein 428 (ZNF428)	MGC51082; Zfp428; C19orf37	NM_182498.2	126299	10.5853	10.743	10.7124	10.9922	11.0217	10.9314	2.08235	0.301543	1.23246
ILMN_1763603	FAM177A1	family with sequence similarity 177, member A1 (FAM177A1), transcript variant 1	DKFZp686J1254; FLJ38854	NM_173607.3	283635	6.81506	7.07253	6.89118	7.15482	7.18785	7.34074	1.62853	0.301544	1.23246
ILMN_1803773	MAG	myelin associated glycoprotein (MAG), transcript variant 2	SIGLEC4A; S-MAG; SIGLEC-4A; GMA	NM_080600.1	4099	5.56071	5.71973	5.57592	6.06178	5.9472	5.75221	1.56029	0.301608	1.23252
ILMN_1745256	CXXC5	CXXC finger 5 (CXXC5)	HSPC195	NM_016463.5	51523	8.26725	8.40386	8.48301	8.65177	8.64133	8.76653	1.83593	0.301833	1.23271
ILMN_2226917	KIAA0247	KIAA0247 (KIAA0247)		NM_014734.2	9766	8.59544	8.49185	8.52865	8.95187	8.7286	8.84141	1.87638	0.301976	1.23283
ILMN_3200140	LOC645638	PREDICTED: misc_RNA (LOC645638), miscRNA.		XR_040455.1	645638	9.58477	9.77017	9.81954	10.1553	9.93207	9.99421	1.61401	0.302373	1.23317
ILMN_2041293	SQLE	squalene epoxidase (SQLE)	FLJ30795	NM_003129.3	6713	9.04549	9.06232	9.02375	9.36785	9.29324	9.37829	2.54891	0.30261	1.23337
ILMN_1797950	EXTL2	exostoses (multiple)-like 2 (EXTL2), transcript variant 1	EXTR2	NM_001439.2	2135	8.01011	8.12877	8.17043	8.50819	8.30058	8.40982	1.82007	0.303095	1.23379
ILMN_2355586	ATRN	attractin (ATRN), transcript variant 2	DPPT-L; MGC126754; MGCA; KIAA0548	NM_139322.1	8455	6.12309	6.16189	6.08108	6.55919	6.33807	6.37851	1.87674	0.303236	1.23391
ILMN_1882018		mRNA; cDNA DKFZp564I0816 (from clone DKFZp564I0816)			NA	5.88996	5.88996	5.89966	6.06178	6.22497	6.30378	1.88551	0.303648	1.23426
ILMN_1747395	SLC24A1	solute carrier family 24 (sodium/potassium/calcium exchanger), member 1 (SLC24A1)	NCKX; RODX; NCKX1; KIAA0702; HsT17412	NM_004727.2	9187	5.55152	5.39232	5.58195	5.9331	5.82018	5.6837	1.66202	0.30373	1.23433
ILMN_1666739	RBM15	RNA binding motif protein 15 (RBM15)	OTT; FLJ12479; SPEN; OTT1; FLJ21943; MGC119584	NM_022768.4	64783	7.17592	7.10119	7.2384	7.38716	7.43045	7.60955	1.80353	0.30388	1.23446
ILMN_1728885	KIAA1644	PREDICTED: KIAA1644 protein (KIAA1644)		XM_936510.2	85352	6.80349	6.85674	6.86171	7.11478	7.2317	7.08746	2.20763	0.304006	1.23457
ILMN_1760727	ANG	angiogenin, ribonuclease, RNase A family, 5 (ANG), transcript variant 2	RNASE5; MGC22466; RNASE4; MGC71966	NM_001097577.1	283	8.13237	7.98982	7.91169	8.35094	8.19918	8.39618	1.71262	0.304138	1.23468
ILMN_3234124	C17orf101	chromosome 17 open reading frame 101 (C17orf101), transcript variant 2		NM_175902.3	79701	6.12309	6.19967	5.93546	6.51254	6.32193	6.33628	1.60698	0.304179	1.23472
ILMN_1691860	SPRY1	sprouty homolog 1, antagonist of FGF signaling (Drosophila) (SPRY1), transcript variant 2	hSPRY1	NM_199327.1	10252	6.88996	6.89118	6.82146	7.09698	7.13237	7.28633	1.99935	0.304362	1.23487
ILMN_3247681	C2orf68	chromosome 2 open reading frame 68 (C2orf68)		NM_001013649.3	388969	5.35403	5.2211	5.26303	5.49825	5.71699	5.53605	1.81411	0.304376	1.23488
ILMN_1798528	SULT1A2	sulfotransferase family, cytosolic, 1A, phenol-preferring, member 2 (SULT1A2), transcript variant 2	MGC142287; MGC142289; ST1A2; TSPST2; P-PST; STP2; HAST4	NM_177528.1	6799	5.2555	5.34696	5.25927	5.55766	5.67807	5.53916	2.13572	0.304385	1.23489
ILMN_1675453	HHIP	hedgehog interacting protein (HHIP)	HIP; FLJ20992; FLJ90230	NM_022475.1	64399	8.5932	8.59991	8.76188	8.95449	9.05718	8.85674	1.79477	0.304468	1.23496
ILMN_1793203	SMCR7L	Smith-Magenis syndrome chromosome region, candidate 7-like (SMCR7L)	FLJ20232; dJ1104E15.3; HSU79252	NM_019008.4	54471	7.99379	7.99435	7.91648	8.34341	8.2446	8.23026	2.27812	0.304551	1.23503
ILMN_1689842	SC4MOL	sterol-C4-methyl oxidase-like (SC4MOL), transcript variant 1	MGC104344; ERG25; DESP4	NM_006745.3	6307	6.34163	6.3906	6.44791	6.74416	6.63952	6.71012	2.2862	0.304554	1.23504
ILMN_1807919	TNS1	tensin 1 (TNS1)	TNS; MGC88584	NM_022648.3	7145	8.07468	7.824	7.78986	8.26444	8.11478	8.22304	1.60325	0.304574	1.23505
ILMN_1733176	LIMS1	PREDICTED: LIM and senescent cell antigen-like domains 1 (LIMS1)		XM_938773.1	3987	10.2204	10.4894	10.4997	10.6808	10.7036	10.7391	1.66734	0.304659	1.23513
ILMN_2328575	CLDN14	claudin 14 (CLDN14), transcript variant 2	DFNB29	NM_012130.2	23562	6.36107	6.33628	6.37156	6.62498	6.70183	6.65678	2.66672	0.304893	1.23533
ILMN_1726840	B3GALNT1	beta-1,3-N-acetylgalactosaminyltransferase 1 (globoside blood group) (B3GALNT1), transcript variant 2	GLCT3; P; Gb4Cer; galT3; P1; GLOB; beta3Gal-T3; B3GALT3	NM_033167.2	8706	5.49185	5.71425	5.80478	5.87529	5.96578	6.08534	1.51975	0.305179	1.23557
ILMN_1682404	SETMAR	SET domain and mariner transposase fusion gene (SETMAR)	METNASE	NM_006515.1	6419	6.96463	7.20848	7.13853	7.44956	7.3906	7.38716	1.85012	0.305227	1.23561
ILMN_1699676	C14orf147	chromosome 14 open reading frame 147 (C14orf147)	MGC24447	NM_138288.3	171546	7.71012	7.71012	7.62863	7.93899	7.979	8.04658	2.32607	0.305234	1.23562
ILMN_1662358	MX1	myxovirus (influenza virus) resistance 1, interferon-inducible protein p78 (mouse) (MX1)	MxA; IFI78; MX; IFI-78K	NM_002462.2	4599	8.0268	8.06501	8.33002	8.45492	8.48059	8.40301	1.62753	0.305561	1.2359
ILMN_2229877	PCDH18	protocadherin 18 (PCDH18)	DKFZP434B0923; PCDH68L; KIAA1562	NM_019035.2	54510	5.72792	5.95187	5.90929	6.20555	6.06393	6.2384	1.73259	0.306269	1.23651
ILMN_2319077	FAS	Fas (TNF receptor superfamily, member 6) (FAS), transcript variant 7	CD95; FAS1; APT1; FASTM; APO-1; ALPS1A; TNFRSF6	NM_152877.1	355	7.21626	7.01011	7.03342	7.39917	7.37417	7.40599	1.96986	0.306514	1.23672
ILMN_1781906	RBM17	RNA binding motif protein 17 (RBM17)	SPF45; MGC14439	NM_032905.3	84991	7.41024	7.52513	7.49346	7.84674	7.66676	7.83542	1.95047	0.306699	1.23687
ILMN_1749868	FAM171A1	family with sequence similarity 171, member A1 (FAM171A1)	MGC130015; FLJ12884; MGC130014	NM_001010924.1	221061	9.56339	9.62772	9.62425	9.9642	9.83684	9.93502	2.2984	0.306901	1.23705
ILMN_2268593	C11orf63	chromosome 11 open reading frame 63 (C11orf63), transcript variant 1	FLJ23554	NM_024806.2	79864	5.07468	5.18587	5.16189	5.51096	5.31832	5.51412	1.88639	0.30699	1.23712
ILMN_1861270		mRNA; cDNA DKFZp686N1644 (from clone DKFZp686N1644)			NA	5.65535	5.54844	5.80735	5.89482	6.03562	6.00225	1.74529	0.307184	1.23729
ILMN_1700024	UST	uronyl-2-sulfotransferase (UST)	2OST	NM_005715.1	10090	8.34563	8.33405	8.23074	8.56186	8.57478	8.69836	2.10359	0.308194	1.23816
ILMN_2206746	BGN	biglycan (BGN)	SLRR1A; PG-S1; PGI; DSPG1	NM_001711.3	633	12.763	12.7769	12.7924	13.2117	13.0335	13.0118	2.0067	0.308231	1.23819
ILMN_1664706	LOC653604	PREDICTED: similar to H3 histone, family 2 isoform 2 (LOC653604)		XM_497711.2	653604	5.2555	5.41278	5.45615	5.75756	5.59694	5.69488	1.85153	0.308314	1.23826
ILMN_1740493	TRAF5	TNF receptor-associated factor 5 (TRAF5), transcript variant 1	MGC:39780; RNF84	NM_004619.3	7188	7.21432	7.26209	7.35667	7.61176	7.58271	7.56453	2.30777	0.308638	1.23854
ILMN_3228852	LOC729839	PREDICTED: misc_RNA (LOC729839), miscRNA.		XR_016021.1	729839	4.98641	5.22497	5.10014	5.41616	5.51412	5.30743	1.70701	0.308734	1.23862
ILMN_1741847	MMP10	matrix metallopeptidase 10 (stromelysin 2) (MMP10)	SL-2; STMY2	NM_002425.1	4319	5.38888	5.2891	5.33985	5.72247	5.56071	5.66107	2.13037	0.308807	1.23868
ILMN_3307782	FBXL18	F-box and leucine-rich repeat protein 18 (FBXL18)	FLJ11467; FLJ10776; FLJ41541; FLJ38075; Fbl18; FLJ26934	NM_024963.4	80028	9.12799	9.28401	9.23434	9.57837	9.56129	9.434	2.00129	0.309105	1.23894
ILMN_1770676	CAPRIN1	cell cycle associated protein 1 (CAPRIN1), transcript variant 1	M11S1; p137GPI; GPIP137; GPIAP1; caprin-1	NM_005898.4	4076	5.55459	5.72792	5.73064	6.00675	5.95187	5.98185	2.0598	0.309106	1.23894
ILMN_2194229	TMEM128	transmembrane protein 128 (TMEM128)	MGC13159; MGC110944	NM_032927.2	85013	6.89845	7.02569	7.12205	7.43379	7.24603	7.2937	1.76085	0.30911	1.23894
ILMN_2176955	CUL5	cullin 5 (CUL5)	VACM-1; VACM1	NM_003478.3	8065	8.07146	8.28494	8.30195	8.5672	8.47978	8.53877	1.8378	0.30913	1.23896
ILMN_2221673	ASNSD1	asparagine synthetase domain containing 1 (ASNSD1)	NBLA00058; NS3TP1; FLJ20752	NM_019048.1	54529	9.39767	9.27263	9.46087	9.58402	9.6893	9.78611	1.81896	0.30942	1.23921
ILMN_1665557	USP15	ubiquitin specific peptidase 15 (USP15)	MGC131982; KIAA0529; UNPH4; MGC149838; MGC74854	NM_006313.1	9958	6.10852	6.07468	6.23266	6.48543	6.34163	6.51728	1.91049	0.30949	1.23927
ILMN_1788384	C9orf5	chromosome 9 open reading frame 5 (C9orf5)	CG2; FLJ33224; CG-2; FLJ23668	NM_032012.3	23731	8.57516	8.68755	8.52513	9.08162	8.84141	8.79344	1.62091	0.309541	1.23931
ILMN_1694385	YWHAB	tyrosine 3-monooxygenase/tryptophan 5-monooxygenase activation protein, beta polypeptide (YWHAB), transcript variant 2	KCIP-1; HS1; GW128	NM_139323.2	7529	11.3245	11.4182	11.376	11.8731	11.5243	11.6506	1.58715	0.309784	1.23952
ILMN_1688070	NSUN5C	NOL1/NOP2/Sun domain family, member 5C (NSUN5C), transcript variant 4	WBSCR20B; NOL1R2; DKFZp434K058; MGC129801; MGC15057; FLJ11626; WBSCR20C	NM_149379.1	260294	5.64962	5.56682	5.86047	5.97957	6.07039	5.95652	1.68605	0.309861	1.23959
ILMN_3250427	LOC646278	PREDICTED: similar to programmed cell death 6 interacting protein (LOC646278), miscRNA.		XR_042488.1	646278	6.27612	6.2384	6.3345	6.48543	6.63372	6.65964	2.05582	0.309921	1.23964
ILMN_2389844	SP3	Sp3 transcription factor (SP3), transcript variant 2	DKFZp686O1631; SPR-2	NM_001017371.3	6670	7.63081	7.7286	7.8505	8.03617	7.93782	8.16641	1.70913	0.310163	1.23985
ILMN_1671661	HSD17B7	hydroxysteroid (17-beta) dehydrogenase 7 (HSD17B7)	MGC12523; MGC75018; PRAP	NM_016371.2	51478	9.40045	9.28216	9.31107	9.83573	9.47756	9.61121	1.55053	0.310273	1.23994
ILMN_1696347	CTSC	cathepsin C (CTSC), transcript variant 1	JPD; DPP1; JP; HMS; CPPI; PALS; PLS; DPPI	NM_001814.2	1075	8.08375	8.22593	8.17941	8.42038	8.58195	8.4187	1.96438	0.310648	1.24026
ILMN_1736757	GNPTAB	N-acetylglucosamine-1-phosphate transferase, alpha and beta subunits (GNPTAB)	MGC4170; KIAA1208; DKFZp762B226; GNPTA; ICD	NM_024312.3	79158	7.32373	7.42543	7.55689	7.77939	7.67807	7.7807	1.87994	0.310707	1.24032
ILMN_1719867	RNF13	ring finger protein 13 (RNF13), transcript variant 1	RZF; MGC13689; FLJ93817	NM_007282.4	11342	4.97269	4.98641	5.15785	5.36807	5.38543	5.29646	2.00385	0.311001	1.24057
ILMN_2198408	MFF	mitochondrial fission factor (MFF), nuclear gene encoding mitochondrial protein	MGC110913; GL004; DKFZp666J168	NM_020194.4	56947	8.66924	8.77479	8.87897	9.24413	9.03397	8.97928	1.63399	0.311462	1.24096
ILMN_1661432	NUP43	nucleoporin 43kDa (NUP43), transcript variant 2	p42; FLJ13287; bA350J20.1	NM_024647.4	348995	8.21868	8.13391	8.33985	8.49506	8.49346	8.63844	1.87205	0.3115	1.241
ILMN_1749115	RTN2	reticulon 2 (RTN2), transcript variant 3	NSP2; NSPL1	NM_206901.1	6253	6.83542	6.62644	6.47897	6.88996	6.96809	7.01792	1.56157	0.311714	1.24118
ILMN_1811363	NOVA1	neuro-oncological ventral antigen 1 (NOVA1), transcript variant 3	Nova-1	NM_006491.2	4857	6.17991	6.44626	6.35755	6.6014	6.69627	6.62205	1.802	0.312002	1.24143
ILMN_2101920	HNRPH1	heterogeneous nuclear ribonucleoprotein H1 (H) (HNRPH1)	DKFZp686A15170; HNRPH; hnRNPH	NM_005520.1	3187	6.96578	7.22497	7.08746	7.50383	7.24982	7.46107	1.57505	0.312169	1.24157
ILMN_2058795	PGCP	plasma glutamate carboxypeptidase (PGCP)		NM_016134.2	10404	8.31334	8.4417	8.36413	8.68545	8.6359	8.73437	2.285	0.312183	1.24159
ILMN_2334385	NCKAP5	NCK-associated protein 5 (NCKAP5), transcript variant 1	FLJ34870; ERIH2	NM_207363.2	344148	5.4822	5.49825	5.52356	5.75489	5.85549	5.83036	2.55419	0.31224	1.24163
ILMN_1769615	FLRT2	fibronectin leucine rich transmembrane protein 2 (FLRT2)	KIAA0405	NM_013231.4	23768	6.20163	6.25172	5.96116	6.35931	6.53605	6.45615	1.61895	0.312333	1.24171
ILMN_1709348	ALDH1A1	aldehyde dehydrogenase 1 family, member A1 (ALDH1A1)	ALDH11; ALDH-E1; ALDC; RALDH1; MGC2318; ALDH1; PUMB1	NM_000689.3	216	8.35094	8.36501	8.25927	8.49985	8.64097	8.77149	1.78633	0.312361	1.24174
ILMN_1913336		cDNA FLJ38835 fis, clone MESAN2002424			NA	5.93074	6.07039	5.94017	6.37678	6.29094	6.2114	2.01211	0.312608	1.24195
ILMN_1683792	LAP3	leucine aminopeptidase 3 (LAP3)	LAP; LAPEP; PEPS	NM_015907.2	51056	8.43879	8.65928	8.63626	9.05393	8.86481	8.75355	1.54864	0.312649	1.24199
ILMN_2165753	HLA-A29.1	major histocompatibility complex class I HLA-A29.1 (HLA-A29.1) XM_001132736 XM_001132742 XM_001132747 XM_001132750 XM_001132753 XM_001132757 XM_001132760 XM_001132769 XM_001132772 XM_001132776 XM_001132779 XM_001132781 XM_001132783 XM_001132785 XM_001132794		NM_001080840.1	649853	5.42962	5.40599	5.15785	5.60585	5.70044	5.62644	1.72741	0.313089	1.24237
ILMN_1703015	ZRANB2	zinc finger, RAN-binding domain containing 2 (ZRANB2), transcript variant 2	DKFZp686J1831; DKFZp686N09117; ZIS2; ZIS1; FLJ41119; ZIS; ZNF265	NM_005455.3	9406	9.72928	9.77479	9.79181	10.0193	10.0363	10.1797	2.17638	0.313134	1.2424
ILMN_2211065	TMEM91	transmembrane protein 91 (TMEM91)	FLJ27310	NM_001042595.1	641649	6.84172	6.81634	6.70183	7.01346	7.17592	7.11061	2.04047	0.313369	1.24261
ILMN_2102069	SLC16A4	solute carrier family 16, member 4 (monocarboxylic acid transporter 5) (SLC16A4)	MCT5; MCT4	NM_004696.1	9122	7.86666	7.72315	7.81314	8.06609	8.22352	8.0542	1.97881	0.313619	1.24282
ILMN_1671123	LOC647543	PREDICTED: hypothetical protein LOC647543, transcript variant 2 (LOC647543)		XM_943178.1	647543	5.49825	5.59694	5.50462	5.83036	5.71149	6	1.75146	0.314015	1.24316
ILMN_1724181	IL15	interleukin 15 (IL15), transcript variant 3	MGC9721; IL-15	NM_000585.2	3600	6.03342	6.10224	6.05528	6.36632	6.31832	6.44956	2.36245	0.314419	1.24351
ILMN_3258795	FAM13B	family with sequence similarity 13, member B (FAM13B), transcript variant 2	KHCHP; MGC57159; FLJ26735; DKFZp667F249; N61	NM_001101800.1	51306	7.93369	7.9507	8.05039	8.24031	8.14466	8.49386	1.57289	0.314681	1.24374
ILMN_3218003	LOC728142	PREDICTED: hypothetical LOC728142 (LOC728142)		XM_001126676.2	728142	5.44956	5.46923	5.59694	5.7866	5.75221	5.92125	1.98035	0.314775	1.24382
ILMN_1683148	PRICKLE2	prickle homolog 2 (Drosophila) (PRICKLE2)	DKFZp686M031; DKFZp686D143; DKFZp686H1748	NM_198859.2	166336	8.56986	8.38284	8.46066	8.83731	8.79019	8.7303	2.06892	0.314814	1.24385
ILMN_2381753	G3BP2	GTPase activating protein (SH3 domain) binding protein 2 (G3BP2), transcript variant 3		NM_203504.1	9908	10.2503	10.2492	10.2059	10.6043	10.4055	10.6402	1.91785	0.314845	1.24388
ILMN_2386982	PRKCZ	protein kinase C, zeta (PRKCZ), transcript variant 1	PKC2	NM_002744.4	5590	5.55766	5.61471	5.81506	5.98413	6.04876	5.89966	1.76098	0.315041	1.24405
ILMN_3300313	P4HTM	prolyl 4-hydroxylase, transmembrane (endoplasmic reticulum) (P4HTM), transcript variant 3	P4H-TM	NM_177938.2	54681	8.21383	8.15431	8.06878	8.52826	8.47654	8.37808	2.09323	0.315319	1.24429
ILMN_1724139	TMEM123	transmembrane protein 123 (TMEM123)	PORMIN; PORIMIN; KCT3	NM_052932.2	114908	10.392	10.4756	10.3302	10.8292	10.6475	10.6676	1.95954	0.315466	1.24441
ILMN_1663092	CITED2	Cbp/p300-interacting transactivator, with Glu/Asp-rich carboxy-terminal domain, 2 (CITED2), transcript variant 1	P35SRJ; MRG1	NM_006079.3	10370	9.17842	9.18809	9.30811	9.5919	9.45348	9.57611	2.10198	0.315619	1.24455
ILMN_3237385	NRBF2	nuclear receptor binding factor 2 (NRBF2)	COPR2; COPR1; NRBF-2; FLJ30395; DKFZp564C1664	NM_030759.3	29982	7.76818	7.74012	7.75355	8.21772	7.95652	8.03452	1.88392	0.315636	1.24456
ILMN_1788689	PHIP	pleckstrin homology domain interacting protein (PHIP)	FLJ20705; FLJ45918; ndrp; WDR11; MGC90216	NM_017934.4	55023	7.51333	7.47005	7.7046	8.04439	7.76421	7.82655	1.57005	0.315725	1.24464
ILMN_1674243	TFRC	transferrin receptor (p90, CD71) (TFRC)	TFR; TFR1; CD71; TRFR	NM_003234.1	7037	11.968	12.0608	11.9937	12.3445	12.2319	12.3934	2.1787	0.315782	1.24469
ILMN_1697817	PANX1	pannexin 1 (PANX1)	MRS1; MGC21309; UNQ2529	NM_015368.3	24145	7.4822	7.49185	7.62863	7.88448	7.6893	7.97728	1.6918	0.316124	1.24498
ILMN_3251132	TMOD2	tropomodulin 2 (neuronal) (TMOD2), transcript variant 2		NM_001142885.1	29767	5.66107	5.73606	5.75756	6.18587	5.97499	5.94251	1.84491	0.316228	1.24507
ILMN_1664802	WSB1	WD repeat and SOCS box-containing 1 (WSB1), transcript variant 2	WSB-1; SWIP1	NM_134265.2	26118	8.68755	8.60733	8.71596	9.08905	8.9678	8.90268	2.06322	0.31623	1.24507
ILMN_1677877	UBE2L3	ubiquitin-conjugating enzyme E2L 3 (UBE2L3), transcript variant 2	L-UBC; UBCH7; E2-F1; UbcM4	NM_198157.1	7332	8.27891	8.33316	8.35491	8.66534	8.73471	8.51609	2.00183	0.316387	1.24521
ILMN_1721741	ATPBD1B	ATP binding domain 1 family, member B (ATPBD1B)	FLJ10349	NM_018066.2	54707	7.6489	7.88387	7.95884	8.13904	8.06447	8.23888	1.61811	0.31693	1.24568
ILMN_2400372	SULT1A2	sulfotransferase family, cytosolic, 1A, phenol-preferring, member 2 (SULT1A2), transcript variant 1	MGC142287; MGC142289; ST1A2; TSPST2; P-PST; STP2; HAST4	NM_001054.2	6799	6.16792	6.34163	6.29462	6.56986	6.53138	6.65535	2.07208	0.317473	1.24615
ILMN_1754538	C10orf58	chromosome 10 open reading frame 58 (C10orf58), transcript variant 1	MGC4248	NM_032333.4	84293	5.96578	5.58796	5.77083	6.1375	6.09381	6.04658	1.57385	0.317772	1.2464
ILMN_1756408	PARVA	parvin, alpha (PARVA)	MXRA2; FLJ12254; FLJ10793	NM_018222.2	55742	7.80993	7.79507	7.70113	8.19967	7.91109	8.14873	1.71839	0.317789	1.24642
ILMN_1669404	KISS1	KiSS-1 metastasis-suppressor (KISS1)	MGC39258; KiSS-1	NM_002256.3	3814	5.19377	4.89239	5.17393	5.34341	5.34696	5.52356	1.56039	0.317946	1.24655
ILMN_1796738	SPAST	spastin (SPAST), transcript variant 1	FSP2; ADPSP; KIAA1083; SPG4	NM_014946.3	6683	6.48543	6.45943	6.60437	6.90929	6.74281	6.85175	2.0419	0.31821	1.24678
ILMN_2135756	HSF2BP	heat shock transcription factor 2 binding protein (HSF2BP)		NM_007031.1	11077	5.18982	5.24413	5.29646	5.57289	5.51096	5.60288	2.43905	0.318776	1.24727
ILMN_1810054	CNN1	calponin 1, basic, smooth muscle (CNN1)	Sm-Calp; SMCC	NM_001299.4	1264	7.69975	7.80607	7.71768	8.08693	7.99039	8.10329	2.31387	0.31904	1.2475
ILMN_1781791	PRRG1	proline rich Gla (G-carboxyglutamic acid) 1 (PRRG1)	PRGP1	NM_000950.1	5638	8.14975	8.40769	8.38068	8.65785	8.5411	8.69697	1.73511	0.319267	1.2477
ILMN_1762224	HPS3	Hermansky-Pudlak syndrome 3 (HPS3)	SUTAL; DKFZp686F0413; FLJ22704	NM_032383.3	84343	6.14771	6.2854	6.43463	6.6279	6.57743	6.62059	1.83517	0.31939	1.2478
ILMN_2169676	ATXN10	ataxin 10 (ATXN10)	E46L; SCA10; FLJ37990	NM_013236.2	25814	6.732	6.76155	6.84674	7.27798	6.97039	7.05094	1.70028	0.319674	1.24805
ILMN_1800739	SPINT2	serine peptidase inhibitor, Kunitz type, 2 (SPINT2)	Kop; PB; HAI-2; HAI2	NM_021102.2	10653	5.48543	5.54535	5.69209	5.86295	5.83036	5.98868	1.90527	0.319706	1.24808
ILMN_1652521	MTMR9	myotubularin related protein 9 (MTMR9)	LIP-STYX; C8orf9; DKFZp434K171; MTMR8; MGC126672	NM_015458.3	66036	7.81698	7.85362	7.8802	8.22786	8.07414	8.20799	2.26216	0.319729	1.2481
ILMN_2316386	GPBAR1	G protein-coupled bile acid receptor 1 (GPBAR1), transcript variant 1	GPR131; M-BAR; GPCR; GPCR19; BG37; TGR5; MGC40597	NM_001077191.1	151306	4.96347	5.16591	5.16591	5.55459	5.42962	5.27053	1.63123	0.319812	1.24817
ILMN_1728202	TMEM22	transmembrane protein 22 (TMEM22), transcript variant 2	DKFZp564K2464; MGC3295	NM_001097599.1	80723	7.78529	7.87836	8.08268	8.35491	8.11738	8.23362	1.59028	0.319862	1.24821
ILMN_1690806	PTPLB	protein tyrosine phosphatase-like (proline instead of catalytic arginine), member b (PTPLB)		NM_198402.2	201562	8.44087	8.51767	8.54187	8.80349	8.72622	8.93103	2.04233	0.320109	1.24842
ILMN_1803652	C9orf91	chromosome 9 open reading frame 91 (C9orf91)	FLJ38045; RP11-402G3.2; DKFZp547P234	NM_153045.2	203197	5.54226	5.51412	5.70598	5.86295	5.91648	5.94486	2.07986	0.320641	1.24889
ILMN_1890614		cDNA FLJ34755 fis, clone NHNPC1000034			NA	5.47897	5.69766	5.66107	5.98641	5.75489	6.05961	1.57573	0.321071	1.24926
ILMN_1784554	LOC647389	PREDICTED: hypothetical protein LOC647389 (LOC647389)		XM_936461.1	647389	7.30561	7.25267	7.30287	7.7866	7.54844	7.48945	1.76288	0.321114	1.24929
ILMN_1753122	MCPH1	microcephalin 1 (MCPH1)	MCT; FLJ12847; BRIT1	NM_024596.2	79648	5.71425	5.97269	6.05094	6.2384	6.28725	6.17592	1.63548	0.321235	1.2494
ILMN_1695640	PTPN22	protein tyrosine phosphatase, non-receptor type 22 (lymphoid) (PTPN22), transcript variant 1	Lyp1; Lyp2; LYP; PEP; PTPN8	NM_015967.3	26191	5.54844	5.51096	5.49506	5.90448	5.80993	5.80478	2.55677	0.321578	1.2497
ILMN_2223903	PPIC	peptidylprolyl isomerase C (cyclophilin C) (PPIC)	MGC3673; CYPC	NM_000943.4	5480	8.62022	8.61912	8.70736	8.93811	8.87406	9.09987	1.97434	0.321781	1.24987
ILMN_1689725	RPLP1	ribosomal protein, large, P1 (RPLP1), transcript variant 1	P1; FLJ27448; RPP1; MGC5215	NM_001003.2	6176	11.7384	11.9777	11.8983	12.2067	12.0248	12.3486	1.55563	0.32186	1.24994
ILMN_1797861	IL6ST	interleukin 6 signal transducer (gp130, oncostatin M receptor) (IL6ST), transcript variant 1	GP130; CD130; IL6R-beta; CDw130; GP130-RAPS	NM_002184.2	3572	8.23984	8.12205	8.36588	8.53255	8.53722	8.62388	1.93815	0.321959	1.25003
ILMN_1915188		cDNA FLJ41813 fis, clone NT2RI2011450			NA	6.96924	7.14057	7.12928	7.30743	7.35403	7.54381	1.78189	0.322054	1.25011
ILMN_1794829	C6orf117	chromosome 6 open reading frame 117 (C6orf117)	RP11-51G5.2	NM_138409.1	112609	5.69766	5.79961	5.71699	6.02901	5.94017	6.2114	1.83593	0.322107	1.25015
ILMN_2136971	FABP3	fatty acid binding protein 3, muscle and heart (mammary-derived growth inhibitor) (FABP3)	O-FABP; FABP11; H-FABP; MDGI	NM_004102.3	2170	5.01792	4.99095	4.96809	5.32553	5.32193	5.29646	3.01879	0.322316	1.25034
ILMN_2311020	DNAJC12	DnaJ (Hsp40) homolog, subfamily C, member 12 (DNAJC12), transcript variant 2	RP11-57G10.2; JDP1	NM_201262.1	56521	5.3505	5.61471	5.50462	5.75489	5.84549	5.83794	1.88081	0.322831	1.25078
ILMN_1783276	NEXN	nexilin (F actin binding protein) (NEXN)	MGC138865; MGC138866; NELIN; MGC104234	NM_144573.3	91624	8.35447	8.60696	8.31107	8.82972	8.65964	8.75221	1.66301	0.323026	1.25095
ILMN_1789991	2017-03-05	membrane-associated ring finger (C3HC4) 4 (MARCH4)	MARCH-IV; RNF174; MGC104908	NM_020814.1	57574	8.42794	8.31016	8.49466	8.78921	8.69905	8.71493	2.15108	0.323479	1.25134
ILMN_3249949	C11orf58	chromosome 11 open reading frame 58 (C11orf58), transcript variant 2		NM_001142705.1	10944	7.75422	7.93664	7.79246	8.19918	7.99831	8.25786	1.74256	0.324009	1.2518
ILMN_1704376	GLDN	gliomedin (GLDN)	CRG-L2; UNC-112; CRGL2; CLOM; FLJ23917; COLM	NM_181789.2	342035	5.47573	5.78136	5.71425	5.926	5.98185	6.03562	1.72645	0.324046	1.25184
ILMN_3251472	TOMM20	translocase of outer mitochondrial membrane 20 homolog (yeast) (TOMM20), nuclear gene encoding mitochondrial protein		NM_014765.2	9804	10.6031	10.753	10.7679	11.1111	10.9873	10.9982	2.08411	0.324222	1.25199
ILMN_1659990	C7orf68	chromosome 7 open reading frame 68 (C7orf68), transcript variant 1	FLJ21076; MGC138388	NM_013332.3	29923	8.28077	8.25172	8.37287	8.72656	8.48301	8.66888	1.88846	0.324366	1.25211
ILMN_1696028	ETNK1	ethanolamine kinase 1 (ETNK1), transcript variant 1	EKI1; EKI; Nbla10396	NM_018638.4	55500	7.05528	7.3336	7.29002	7.69627	7.4545	7.50144	1.59429	0.324437	1.25218
ILMN_1784985	PRRT3	proline-rich transmembrane protein 3 (PRRT3)	FLJ33674; MGC105134; MGC33990	NM_207351.3	285368	7.06393	7.09698	7.06932	7.36545	7.40939	7.42878	2.9216	0.324463	1.2522
ILMN_1807969	SNCAIP	synuclein, alpha interacting protein (SNCAIP)	MGC39814; SYPH1	NM_005460.2	9627	5.45615	5.58796	5.42962	5.83542	5.7866	5.82528	2.30351	0.324521	1.25225
ILMN_1687501	MOXD1	monooxygenase, DBH-like 1 (MOXD1), transcript variant 2	MOX; dJ248E1.1; PRO5780; DKFZP564G202	NM_015529.2	26002	5.95187	6.10434	6.00675	6.36807	6.38543	6.28355	2.25049	0.3247	1.2524
ILMN_2197519	ZNF627	zinc finger protein 627 (ZNF627)	FLJ90365	NM_145295.2	199692	7.8857	7.81378	8.03232	8.3505	8.07895	8.27659	1.68112	0.324746	1.25244
ILMN_2410540	CASP2	caspase 2, apoptosis-related cysteine peptidase (CASP2), transcript variant 1	NEDD2; ICH1; ICH-1L/1S; CASP-2; ICH-1L	NM_032982.2	835	8.6872	8.79961	8.57969	9.08082	9.01597	8.94486	1.97772	0.32505	1.25271
ILMN_1724376	C2orf30	chromosome 2 open reading frame 30 (C2orf30)	CL24936; CL25084; XTP3TPB	NM_015701.2	27248	9.35997	9.48361	9.30766	9.84345	9.54554	9.73826	1.70028	0.325338	1.25296
ILMN_2113738	C8orf45	chromosome 8 open reading frame 45 (C8orf45)	FLJ25692	NM_173518.2	157777	10.1534	10.1375	10.1179	10.5755	10.4507	10.359	2.12302	0.325461	1.25307
ILMN_3241237	LOC100132503	PREDICTED: similar to ring finger protein 208 (LOC100132503)		XM_001721014.1	100132503	5.94486	5.9472	5.87283	6.24793	6.25739	6.23649	2.83527	0.325641	1.25322
ILMN_1714433	MARCKSL1	MARCKS-like 1 (MARCKSL1)	F52; MACMARCKS; MLP; MLP1; MRP	NM_023009.4	65108	9.91019	9.88173	9.668	10.1585	10.1421	10.137	1.95832	0.325888	1.25344
ILMN_1707434	LOC653778	PREDICTED: similar to solute carrier family 25, member 37 (LOC653778)		XM_929667.1	653778	7.74618	7.71699	7.78921	8.25597	7.87098	8.10381	1.60179	0.32613	1.25365
ILMN_1795298	GPER	G protein-coupled estrogen receptor 1 (GPER), transcript variant 3	LyGPR; DRY12; GPCR-Br; LERGU; MGC99678; GPR30; CEPR; CMKRL2; FEG-1; LERGU2	NM_001039966.1	2852	7.19574	7.22014	7.32373	7.62132	7.62571	7.47168	2.12257	0.326365	1.25385
ILMN_1720771	STX11	syntaxin 11 (STX11)	FHL4; HLH4; HPLH4	NM_003764.2	8676	5.91648	5.91886	5.88264	6.38543	6.23074	6.08108	1.83031	0.326424	1.2539
ILMN_1730504	AGPAT4	1-acylglycerol-3-phosphate O-acyltransferase 4 (lysophosphatidic acid acyltransferase, delta) (AGPAT4)	dJ473J16.2; LPAAT-delta; 1-AGPAT4; RP3-473J16.2	NM_020133.2	56895	6.1819	6.3733	6.2384	6.70321	6.50303	6.56682	1.90238	0.326485	1.25395
ILMN_1712455	RBM4	RNA binding motif protein 4 (RBM4)	ZCRB3A; ZCCHC21; RBM4A; LARK; MGC75138; DKFZp547K0918	NM_002896.2	5936	7.03012	7.10643	7.17592	7.42206	7.4187	7.45121	2.45376	0.3265	1.25397
ILMN_1770641	KLHL3	kelch-like 3 (Drosophila) (KLHL3)	FLJ40871; KIAA1129; MGC44594	NM_017415.1	26249	7.04002	7.04111	7.02569	7.44956	7.2937	7.34341	2.40263	0.326617	1.25407
ILMN_1872404		cDNA FLJ31090 fis, clone IMR321000102			NA	6.63227	6.76951	6.77215	7.02569	7.15684	6.97154	2.02253	0.326718	1.25416
ILMN_1696532	RBBP5	retinoblastoma binding protein 5 (RBBP5)	RBQ3; SWD1	NM_005057.2	5929	6.19771	6.15987	6.01123	6.32553	6.41616	6.60733	1.71614	0.326739	1.25418
ILMN_1651557	KDELC2	KDEL (Lys-Asp-Glu-Leu) containing 2 (KDELC2)	MGC33424	NM_153705.4	143888	8.00843	7.78921	7.79766	8.22255	8.1127	8.24174	1.90348	0.327234	1.25461
ILMN_1801302	SCN1B	sodium channel, voltage-gated, type I, beta (SCN1B), transcript variant a	GEFSP1	NM_001037.3	6324	6.15178	6.12102	6.34341	6.49025	6.59991	6.50779	1.95786	0.327252	1.25462
ILMN_1708081	LCLAT1	lysocardiolipin acyltransferase 1 (LCLAT1), transcript variant 2	ALCAT1; FLJ37965; AGPAT8; UNQ1849	NM_001002257.1	253558	8.21626	8.47533	8.45039	8.79181	8.57516	8.75689	1.66905	0.327297	1.25466
ILMN_1778691	TIA1	TIA1 cytotoxic granule-associated RNA binding protein (TIA1), transcript variant 2		NM_022173.1	7072	6.67384	6.54844	6.77742	7.12309	6.90809	6.9507	1.7891	0.327395	1.25475
ILMN_1791949	PGBD1	piggyBac transposable element derived 1 (PGBD1)	dJ874C20.4; SCAND4; HUCEP-4	NM_032507.2	84547	6.40429	6.34518	6.29094	6.66676	6.48059	6.87652	1.57104	0.327816	1.25511
ILMN_2284744	HNMT	histamine N-methyltransferase (HNMT), transcript variant 1	HNMT-S2; HMT; HNMT-S1	NM_006895.2	3176	6.10434	6.20359	6.35755	6.55152	6.46271	6.63517	1.83612	0.327972	1.25525
ILMN_2086095	ID2	inhibitor of DNA binding 2, dominant negative helix-loop-helix protein (ID2)	GIG8; MGC26389; ID2A; ID2H	NM_002166.4	3398	9.75656	9.80945	10.025	10.137	10.1534	10.2846	1.78106	0.328002	1.25527
ILMN_2124816	ZNF34	zinc finger protein 34 (ZNF34)	MGC10520; KOX32	NM_030580.2	80778	5.22497	5.22882	5.24793	5.74953	5.42626	5.51096	1.75825	0.328349	1.25558
ILMN_2197365	RGS2	regulator of G-protein signalling 2, 24kDa (RGS2)	G0S8	NM_002923.1	5997	7.42878	7.45943	7.67666	8.01569	7.70667	7.82845	1.57457	0.328648	1.25584
ILMN_2191634	RPL37	ribosomal protein L37 (RPL37)	MGC99572; DKFZp686G1699	NM_000997.4	6167	4.97269	5.14975	5.0268	5.36107	5.39917	5.37504	2.29428	0.328679	1.25586
ILMN_1789074	HSPA1A	heat shock 70kDa protein 1A (HSPA1A)	HSPA1; HSP70-1; HSPA1B; HSP72	NM_005345.4	3303	9.68755	9.60973	9.84125	9.92659	10.1214	10.0771	1.82978	0.328849	1.25601
ILMN_1760556	C1orf63	chromosome 1 open reading frame 63 (C1orf63), transcript variant 1	RP3-465N24.4; NPD014; DJ465N24.2.1	NM_207035.1	57035	5.4363	5.74416	5.82273	6.01569	6.01123	5.96347	1.57597	0.32907	1.2562
ILMN_1849013		primary neuroblastoma cDNA, clone:Nbla10111, full insert sequence			NA	10.8625	10.9113	10.7082	11.1304	11.198	11.141	2.13144	0.329111	1.25624
ILMN_1735038	2017-03-04	membrane-associated ring finger (C3HC4) 3 (MARCH3)	RNF173; MARCH-III; MGC48332	NM_178450.2	115123	7.39318	7.55612	7.55536	7.83794	7.87467	7.77939	2.18558	0.329118	1.25624
ILMN_1888609		602353719F1 NIH_MGC_90 cDNA clone IMAGE:4451716 5, mRNA sequence			NA	6.94251	7.09908	7.04002	7.35931	7.40088	7.30925	2.31092	0.329275	1.25638
ILMN_2067656	CCND2	cyclin D2 (CCND2)	KIAK0002; MGC102758	NM_001759.2	894	9.33718	9.25739	9.23625	9.51983	9.54632	9.75255	1.94359	0.329293	1.2564
ILMN_1723480	BST2	bone marrow stromal cell antigen 2 (BST2)	CD317	NM_004335.2	684	8.76188	8.91169	8.96405	9.18512	9.2854	9.15634	2.03775	0.329745	1.25679
ILMN_1708934	ADM	adrenomedullin (ADM)	AM	NM_001124.1	133	10.9614	10.8733	10.9956	11.2563	11.2573	11.306	2.54313	0.329765	1.25681
ILMN_1698179	TAGLN3	transgelin 3 (TAGLN3), transcript variant 3	NP22; NP25	NM_001008273.1	29114	7.09064	7.13031	7.10643	7.40259	7.63154	7.28263	1.71138	0.329788	1.25683
ILMN_1807493	ACVRL1	activin A receptor type II-like 1 (ACVRL1)	ORW2; HHT; ALK-1; ALK1; SKR3; HHT2; ACVRLK1	NM_000020.1	94	5.18587	5.31832	5.23649	5.50144	5.64674	5.58195	2.24731	0.329819	1.25686
ILMN_1764166	BCKDHB	branched chain keto acid dehydrogenase E1, beta polypeptide (maple syrup urine disease) (BCKDHB), nuclear gene encoding mitochondrial protein, transcript variant 1	E1B	NM_183050.1	594	6.44626	6.45779	6.56071	6.82528	6.76686	6.86295	2.43462	0.330107	1.25711
ILMN_1684461	CADPS2	Ca++-dependent secretion activator 2 (CADPS2), transcript variant 1	KIAA1591; FLJ40851	NM_017954.9	93664	6.10434	6	6.06178	6.43796	6.26866	6.45121	2.12149	0.330572	1.25751
ILMN_1660357	LOC641825	PREDICTED: hypothetical protein LOC641825 (LOC641825)		XM_935575.1	641825	5.66676	5.65249	5.69766	6.06178	5.90689	6.04002	2.3627	0.330592	1.25753
ILMN_1769390	ABHD15	abhydrolase domain containing 15 (ABHD15)		NM_198147.1	116236	6.3147	6.3345	6.43962	6.72247	6.61176	6.74685	2.25701	0.330754	1.25767
ILMN_2356031	RNF121	ring finger protein 121 (RNF121), transcript variant 1	FLJ11099	NM_018320.3	55298	8.70183	8.69314	8.64746	8.99661	8.99915	9.03947	2.96678	0.330938	1.25783
ILMN_1800626	SESN1	sestrin 1 (SESN1)	SEST1; MGC138241; MGC142129; PA26; RP11-787I22.1	NM_014454.1	27244	7.20065	7.24031	7.15279	7.4814	7.58871	7.51649	2.54215	0.330946	1.25784
ILMN_2377185	TCEB2	transcription elongation factor B (SIII), polypeptide 2 (18kDa, elongin B) (TCEB2), transcript variant 1	SIII	NM_007108.2	6923	7.40769	7.46189	7.38457	7.80155	7.72656	7.71973	2.66005	0.331229	1.25808
ILMN_1656111	MYLIP	myosin regulatory light chain interacting protein (MYLIP)	MIR	NM_013262.3	29116	7.54767	7.60437	7.47492	7.65535	7.92184	8.04385	1.57509	0.331361	1.2582
ILMN_2086612	CMAH	cytidine monophosphate-N-acetylneuraminic acid hydroxylase (CMP-N-acetylneuraminate monooxygenase) (CMAH) on chromosome 6.	CSAH	NR_002174.1	8418	5.74147	5.66959	5.65821	6.07682	6.04002	5.9472	2.4336	0.331586	1.2584
ILMN_1711828	ANKRD10	ankyrin repeat domain 10 (ANKRD10)	DKFZp686B07190; FLJ20093	NM_017664.2	55608	5.87529	5.78921	5.80993	6.15785	6.05961	6.25172	2.19689	0.331587	1.2584
ILMN_1724493	LYSMD2	LysM, putative peptidoglycan-binding, domain containing 2 (LYSMD2)	MGC35274; DKFZp686I2243	NM_153374.1	256586	8.25739	8.5074	8.59544	8.7286	8.80639	8.82082	1.70243	0.331859	1.25863
ILMN_3306482	LOC730107	PREDICTED: similar to Glycine cleavage system H protein, mitochondrial (LOC730107)		XM_001721064.1	730107	8.99661	9.22497	9.24816	9.63027	9.41743	9.41806	1.68735	0.332005	1.25876
ILMN_1767662	LASS6	LAG1 homolog, ceramide synthase 6 (LASS6)	CerS6; MGC129950; MGC129949	NM_203463.1	253782	8.87897	8.99972	8.87406	9.2329	9.32823	9.18859	2.24702	0.332323	1.25904
ILMN_1655077	PRDM1	PR domain containing 1, with ZNF domain (PRDM1), transcript variant 1	MGC118922; BLIMP1; PRDI-BF1; MGC118925; MGC118924; MGC118923	NM_001198.2	639	5.1819	5.08321	5.10014	5.58796	5.39575	5.37851	2.03347	0.332326	1.25904
ILMN_2362581	FNDC3A	fibronectin type III domain containing 3A (FNDC3A), transcript variant 1	KIAA0970; bA203I16.5; FNDC3; RP11-203I16.5; bA203I16.1; FLJ31509	NM_001079673.1	22862	8.15178	8.37678	8.36938	8.61581	8.49386	8.78594	1.64595	0.332559	1.25925
ILMN_3286204	LOC646547	PREDICTED: misc_RNA (LOC646547), miscRNA.		XR_017127.2	646547	5.07468	5.33271	5.25172	5.73877	5.4363	5.4822	1.57843	0.332721	1.25939
ILMN_2395373	GABBR1	gamma-aminobutyric acid (GABA) B receptor, 1 (GABBR1), transcript variant 4	dJ271M21.1.1; dJ271M21.1.2; GPRC3A; GABBR1-3; GABAB(1e); hGB1a; GABABR1	NM_021905.1	2550	5.22882	5.40939	5.38543	5.69488	5.66391	5.66391	2.26142	0.333022	1.25965
ILMN_1784532	COL22A1	collagen, type XXII, alpha 1 (COL22A1)		NM_152888.1	169044	5.33628	5.20555	5.35403	5.67525	5.54535	5.67525	2.17184	0.333331	1.25992
ILMN_1705442	CMTM3	CKLF-like MARVEL transmembrane domain containing 3 (CMTM3), transcript variant 1	BNAS2; CKLFSF3; FLJ31762; MGC51956	NM_144601.2	123920	9.38219	9.39489	9.38651	9.71596	9.8051	9.64277	2.43741	0.333414	1.25999
ILMN_1657515	RPS6KA5	ribosomal protein S6 kinase, 90kDa, polypeptide 5 (RPS6KA5), transcript variant 1	RLPK; MSPK1; MGC1911; MSK1	NM_004755.2	9252	5.93782	5.75221	5.8802	6.17592	6.12309	6.2724	2.08785	0.333728	1.26027
ILMN_1660658	MUC12	PREDICTED: mucin 12, cell surface associated (MUC12)		XM_936315.2	10071	5.12928	5.01346	4.97269	5.55766	5.35403	5.20555	1.6529	0.333932	1.26044
ILMN_1734276	PMEPA1	prostate transmembrane protein, androgen induced 1 (PMEPA1), transcript variant 2	STAG1; PMEPA1	NM_199169.1	56937	8.108	8.03342	7.91409	8.26585	8.41659	8.37504	2.0631	0.333988	1.26049
ILMN_2269256	DNAJC12	DnaJ (Hsp40) homolog, subfamily C, member 12 (DNAJC12), transcript variant 1	RP11-57G10.2; JDP1	NM_021800.2	56521	5.48543	5.42962	5.65821	5.96809	5.7252	5.88264	1.7714	0.334225	1.2607
ILMN_1792997	NPTN	neuroplastin (NPTN), transcript variant beta	SDFR1; GP55; DKFZp686L2477; np65; np55; GP65; SDR1; MGC102805	NM_012428.2	27020	10.3498	10.5411	10.7303	10.9982	10.7557	10.8703	1.51991	0.334339	1.2608
ILMN_1721818	CLDN10	claudin 10 (CLDN10), transcript variant 2	CPETRL3; OSP-L	NM_006984.3	9071	5.36457	5.39232	5.47249	5.74416	5.69766	5.79181	2.53671	0.334753	1.26116
ILMN_1700144	ITGA10	integrin, alpha 10 (ITGA10)	PRO827	NM_003637.3	8515	5.20163	5.15381	5.1819	5.64097	5.40939	5.49185	2.10823	0.334958	1.26134
ILMN_1653836	C11orf41	chromosome 11 open reading frame 41 (C11orf41)	MGC34830; G2; FLJ36988; C11orf69	NM_012194.1	25758	6.74685	6.65392	6.80219	7.07361	7.01792	7.11686	2.36705	0.335143	1.2615
ILMN_1714523	HEPH	hephaestin (HEPH), transcript variant 1	KIAA0698; CPL	NM_138737.1	9843	7.2114	7.36107	7.26397	7.52669	7.65392	7.66249	2.21121	0.335555	1.26186
ILMN_3255792	LOC100128505	PREDICTED: similar to hCG2021201 (LOC100128505)		XM_001723239.1	100128505	11.8029	11.8369	11.8485	12.3847	12.0812	12.0292	1.66632	0.335591	1.26189
ILMN_2191402	HLCS	holocarboxylase synthetase (biotin-(proprionyl-Coenzyme A-carboxylase (ATP-hydrolysing)) ligase) (HLCS)	HCS	NM_000411.4	3141	5.27053	5.64097	5.4822	5.82018	5.77347	5.80735	1.69658	0.335768	1.26205
ILMN_2149766	APPBP2	amyloid beta precursor protein (cytoplasmic tail) binding protein 2 (APPBP2)	PAT1; KIAA0228; HS.84084	NM_006380.2	10513	8.51136	8.47654	8.52709	8.85767	8.75355	8.91139	2.42707	0.335875	1.26214
ILMN_1812262	DDR1	discoidin domain receptor tyrosine kinase 1 (DDR1), transcript variant 1	TRKE; EDDR1; CD167; NEP; PTK3A; PTK3; DDR; CAK; NTRK4; RTK6; MCK10	NM_013993.2	780	7.65105	7.38284	7.43379	7.84486	7.67596	7.95478	1.6373	0.335971	1.26223
ILMN_1778087	ANXA8	annexin A8 (ANXA8)	ANXA8L2; FLJ32754; ANX8; VAC beta	NM_001630.1	244	5.08321	5.1334	5.15381	5.61471	5.36457	5.39917	1.96818	0.336012	1.26226
ILMN_1798308	AHSA2	AHA1, activator of heat shock 90kDa protein ATPase homolog 2 (yeast) (AHSA2)	DKFZp564C236; Hch1	NM_152392.2	130872	6.27798	6.43796	6.22304	6.80478	6.50462	6.63807	1.6991	0.336163	1.26239
ILMN_1801822	C18orf25	chromosome 18 open reading frame 25 (C18orf25), transcript variant 2	ARKL1; MGC12909; MGC87799	NM_001008239.2	147339	8.94046	9.0381	8.98157	9.20994	9.36632	9.39403	2.1919	0.336724	1.26289
ILMN_2163723	KRT7	keratin 7 (KRT7)	K7; MGC3625; MGC129731; SCL; K2C7; CK7	NM_005556.3	3855	10.2884	10.2422	10.1804	10.6559	10.5212	10.5457	2.38164	0.337267	1.26336
ILMN_3197767	LOC645691	PREDICTED: similar to heterogeneous nuclear ribonucleoprotein A1 (LOC645691)		XM_928701.3	645691	7.99605	8.16088	8.15836	8.63844	8.23218	8.45656	1.53852	0.337297	1.26339
ILMN_2230025	PDLIM3	PDZ and LIM domain 3 (PDLIM3)	DKFZp686L0362; ALP	NM_014476.1	27295	10.2966	10.2549	10.2049	10.753	10.4515	10.564	1.85791	0.337369	1.26345
ILMN_2298365	PPP2R2B	protein phosphatase 2 (formerly 2A), regulatory subunit B, beta isoform (PPP2R2B), transcript variant 5	PR2AB-BETA; PR52B; PR2APR55-BETA; PR2AB55-BETA; MGC24888; PR55-BETA; PP2A-PR55B; SCA12	NM_181677.1	5521	7.04002	7.2384	6.97384	7.44128	7.42543	7.39832	1.98371	0.337588	1.26364
ILMN_1725612	NUP50	nucleoporin 50kDa (NUP50), transcript variant 2	NPAP60; MGC39961; NPAP60L	NM_007172.3	10762	7.14568	7.19377	7.07895	7.42038	7.51254	7.49825	2.52649	0.337592	1.26365
ILMN_1777977	LOC643980	PREDICTED: similar to FRG1 protein (FSHD region gene 1 protein), transcript variant 2 (LOC643980)		XM_933068.1	643980	5.34341	5.17393	5.21335	5.52982	5.51412	5.70044	2.00737	0.3379	1.26392
ILMN_1699249	ZNF649	zinc finger protein 649 (ZNF649)	FLJ12644	NM_023074.2	65251	5.50144	5.62936	5.6893	5.90929	6.04439	5.8802	2.05143	0.337929	1.26394
ILMN_1804351	FZD7	frizzled homolog 7 (Drosophila) (FZD7)	FzE3	NM_003507.1	8324	5.35755	5.42962	5.52042	5.73877	5.68089	5.90207	1.97705	0.338046	1.26404
ILMN_1749432	MRPL32	mitochondrial ribosomal protein L32 (MRPL32), nuclear gene encoding mitochondrial protein	bMRP-59b; HSPC283; L32mt; MRP-L32	NM_031903.1	64983	9.44357	9.60696	9.57705	9.95187	9.8088	9.88387	2.19062	0.338986	1.26487
ILMN_1716797	CD302	CD302 molecule (CD302)	BIMLEC; CLEC13A; KIAA0022; DCL-1	NM_014880.3	9936	5.88264	5.94953	5.90689	6.12722	6.40599	6.22304	1.95101	0.33906	1.26493
ILMN_1693259	PDCD6IP	programmed cell death 6 interacting protein (PDCD6IP)	MGC17003; Alix; DRIP4; AIP1; HP95	NM_013374.3	10015	7.5691	7.54303	7.46434	7.91409	7.70874	7.97097	1.93393	0.339108	1.26497
ILMN_1665526	TCEA2	transcription elongation factor A (SII), 2 (TCEA2), transcript variant 2	TFIIS	NM_198723.1	6919	7.54148	7.77413	7.57592	7.99095	8.03067	7.88753	1.95143	0.339206	1.26506
ILMN_1676213	SRPX2	sushi-repeat-containing protein, X-linked 2 (SRPX2)	SRPUL; RESDX	NM_014467.2	27286	8.25644	8.40259	8.36282	8.81826	8.61066	8.61066	1.97794	0.339241	1.26509
ILMN_1657754	RPAP2	RNA polymerase II associated protein 2 (RPAP2)	C1orf82; FLJ13150; RP11-163M2.4	NM_024813.1	79871	6.99095	6.78529	6.89118	7.3336	7.24413	7.10748	1.90275	0.339262	1.26511
ILMN_1651535	TMEM217	transmembrane protein 217 (TMEM217)	dJ355M6.2	NM_145316.2	221468	5.39232	5.27798	5.52669	5.86047	5.59694	5.75756	1.74183	0.33932	1.26516
ILMN_1654398	RGL1	ral guanine nucleotide dissociation stimulator-like 1 (RGL1)	RGL; KIAA0959	NM_015149.3	23179	8.35226	8.3837	8.29462	8.80574	8.59507	8.64782	2.14554	0.339348	1.26518
ILMN_1674063	OAS2	2-5-oligoadenylate synthetase 2, 69/71kDa (OAS2), transcript variant 1	MGC78578	NM_016817.2	4939	7.19574	6.98755	7.26679	7.29646	7.58796	7.58421	1.56069	0.339519	1.26533
ILMN_1809583	CREBBP	CREB binding protein (CREBBP), transcript variant 2	CBP; KAT3A; RTS; RSTS	NM_001079846.1	1387	7.67596	7.76288	7.60659	8.14924	7.90268	8.01235	1.95009	0.339611	1.26542
ILMN_1799642	TRIM24	tripartite motif-containing 24 (TRIM24), transcript variant 1	PTC6; TIF1ALPHA; RNF82; TIF1A; TF1A; hTIF1; TIF1	NM_015905.2	8805	6.8392	6.96578	7.06286	7.41701	7.21626	7.25361	1.89652	0.339679	1.26547
ILMN_2287653	PLAG1	pleiomorphic adenoma gene 1 (PLAG1)	PSA; SGPA	NM_002655.1	5324	5.55152	5.62936	5.50779	5.94953	5.82782	5.93074	2.39943	0.339808	1.26559
ILMN_1687652	TGFB3	transforming growth factor, beta 3 (TGFB3)	FLJ16571; ARVD; TGF-beta3	NM_003239.1	7043	5.92362	5.69209	5.84549	6.12722	6.14364	6.2114	2.09538	0.340351	1.26606
ILMN_1729216	CRYAB	crystallin, alpha B (CRYAB)	CTPP2; HSPB5; CRYA2	NM_001885.1	1410	8.59208	8.26632	8.25833	8.73573	8.68018	8.72247	1.69494	0.340548	1.26624
ILMN_1766000	PM20D2	peptidase M20 domain containing 2 (PM20D2)	bA63L7.3; ACY1L2	NM_001010853.1	135293	6.08958	6.10014	6.10224	6.57592	6.25739	6.48059	1.84954	0.340645	1.26632
ILMN_1712759	SBSN	suprabasin (SBSN)	UNQ698; MGC75533	NM_198538.1	374897	5.27053	5.12928	5.2891	5.6893	5.39232	5.62936	1.7609	0.340688	1.26636
ILMN_1902705		DKFZp686P0649_s1 686 (synonym: hlcc3) cDNA clone DKFZp686P0649 3, mRNA sequence			NA	5.0917	4.80219	5.1127	5.38198	5.31832	5.32912	1.77753	0.340941	1.26658
ILMN_1800697	LDB2	LIM domain binding 2 (LDB2)	LDB1; CLIM1	NM_001290.2	9079	7.63517	7.56148	7.52982	7.9507	7.7286	8.07039	1.75277	0.341073	1.2667
ILMN_1795435	ZNF264	zinc finger protein 264 (ZNF264)		NM_003417.3	9422	6.83036	7.12516	6.82273	7.34341	7.15482	7.30378	1.66762	0.341255	1.26686
ILMN_1778876	FAM179B	family with sequence similarity 179, member B (FAM179B)	DKFZp686D12126	NM_015091.2	23116	7.04549	7.08002	6.97957	7.33271	7.42794	7.36894	2.62324	0.341506	1.26708
ILMN_1792506	PLA1A	phospholipase A1 member A (PLA1A)	PSPLA1; PS-PLA1	NM_015900.1	51365	5.44294	5.44956	5.18982	5.62352	5.64674	5.83794	1.71915	0.341956	1.26747
ILMN_1797277	KIF3C	kinesin family member 3C (KIF3C)		NM_002254.6	3797	6.71562	6.70044	6.63952	7.01235	6.96578	7.10538	2.50335	0.342645	1.26808
ILMN_1760256	RBM22	RNA binding motif protein 22 (RBM22)	FLJ10290; ZC3H16	NM_018047.1	55696	9.43338	9.52474	9.50641	9.74315	9.83178	9.91797	2.32599	0.342794	1.26821
ILMN_1701464	ZNF776	zinc finger protein 776 (ZNF776)	DKFZp686K10134; FLJ38288; DKFZp781G1213	NM_173632.2	284309	5.37156	5.57289	5.48543	5.75221	5.89966	5.80735	2.11611	0.343117	1.26849
ILMN_1783735	LOC649639	PREDICTED: hypothetical protein LOC649639 (LOC649639)		XM_943818.1	649639	5.24031	5.1334	5.16189	5.61176	5.37156	5.58195	1.99805	0.343225	1.26859
ILMN_1769091	PRCP	prolylcarboxypeptidase (angiotensinase C) (PRCP), transcript variant 2	HUMPCP; PCP; MGC2202	NM_199418.2	5547	10.6898	10.8377	10.8307	11.2573	11.0847	11.0464	2.01385	0.343391	1.26874
ILMN_1861609		7a31b08.x1 NCI_CGAP_GC6 cDNA clone IMAGE:3220311 3, mRNA sequence			NA	5.27053	5.2211	5.34341	5.64386	5.55766	5.66391	2.49033	0.343462	1.2688
ILMN_3295419	LOC644363	PREDICTED: misc_RNA (LOC644363), miscRNA.		XR_038766.1	644363	5.67525	5.64674	5.7761	6.18785	5.95652	5.98413	1.9907	0.343469	1.2688
ILMN_1718863	KCNK1	potassium channel, subfamily K, member 1 (KCNK1)	K2p1.1; TWIK-1; TWIK1; HOHO; DPK	NM_002245.2	3775	6.44791	6.39575	6.65678	7.03672	6.6879	6.80864	1.56916	0.344275	1.26951
ILMN_1774287	CFB	complement factor B (CFB)	H2-Bf; CFAB; BFD; BF; GBG; PBF2	NM_001710.4	629	9.0474	9.00787	9.07655	9.35931	9.23793	9.56758	1.83156	0.344333	1.26956
ILMN_1877317		UI-H-BW0-aim-a-09-0-UI.s1 NCI_CGAP_Sub6 cDNA clone IMAGE:2729752 3, mRNA sequence			NA	5.2555	5.30012	5.50144	5.65821	5.63517	5.79701	1.9063	0.344445	1.26966
ILMN_1668194	LMTK3	PREDICTED: lemur tyrosine kinase 3 (LMTK3)		XM_936372.2	114783	5.81762	5.88264	5.7252	6.24031	6.09381	6.12516	2.24489	0.344607	1.26981
ILMN_1726169	EDF1	endothelial differentiation-related factor 1 (EDF1), transcript variant alpha	EDF-1; MBF1; MGC9058	NM_003792.2	8721	11.1812	11.2507	11.2648	11.7961	11.3979	11.5369	1.64798	0.344763	1.26994
ILMN_1781010	ARHGEF3	Rho guanine nucleotide exchange factor (GEF) 3 (ARHGEF3)	DKFZP434F2429; XPLN; GEF3; MGC118905; STA3	NM_019555.1	50650	8.2211	8.25219	8.12877	8.55075	8.42459	8.66142	2.05885	0.344897	1.27006
ILMN_1814606	GALNT2	UDP-N-acetyl-alpha-D-galactosamine:polypeptide N-acetylgalactosaminyltransferase 2 (GalNAc-T2) (GALNT2)	GalNAc-T2	NM_004481.2	2590	7.18686	7.11374	7.10014	7.49665	7.4822	7.45779	2.90353	0.345304	1.27042
ILMN_3243142	KAT2B	K(lysine) acetyltransferase 2B (KAT2B)	KAT2B; P; P/CAF; CAF	NM_003884.4	8850	7.45943	7.42375	7.57213	7.93664	7.79831	7.75689	2.15829	0.345509	1.2706
ILMN_2388585	GOPC	golgi associated PDZ and coiled-coil motif containing (GOPC), transcript variant 1	GOPC1; FIG; CAL; PIST; dJ94G16.2	NM_020399.2	57120	7.21335	7.17193	7.43879	7.71768	7.49346	7.65033	1.76472	0.3458	1.27086
ILMN_2195482	CACNB3	calcium channel, voltage-dependent, beta 3 subunit (CACNB3)	CACNLB3	NM_000725.2	784	8.43129	8.37591	8.14313	8.50144	8.79896	8.68755	1.61999	0.345874	1.27092
ILMN_1668924	BEGAIN	brain-enriched guanylate kinase-associated homolog (rat) (BEGAIN)	KIAA1446; BEGAIN	NM_020836.2	57596	5.33271	5.41954	5.39575	5.58195	5.82782	5.7761	2.04826	0.345961	1.271
ILMN_1787981	MFAP2	microfibrillar-associated protein 2 (MFAP2), transcript variant 1	MAGP-1; MAGP; MAGP1	NM_017459.1	4237	7.76752	7.853	7.76752	8.17542	8.11998	8.13083	2.81654	0.346063	1.27109
ILMN_1696974	ANG	angiogenin, ribonuclease, RNase A family, 5 (ANG), transcript variant 2	RNASE5; MGC22466; RNASE4; MGC71966	NM_001097577.1	283	6.94486	6.90207	7.05961	7.30287	7.23266	7.41193	2.16941	0.346972	1.27189
ILMN_2089752	LOC285016	hypothetical protein LOC285016 (LOC285016)	RGPG542; PRO1097	NM_001002919.1	285016	6.44294	6.55305	6.56224	6.87406	6.95303	6.77215	2.24461	0.347001	1.27191
ILMN_1686981	SULF2	sulfatase 2 (SULF2), transcript variant 1	MGC126411; FLJ90554; KIAA1247; HSULF-2; DKFZp313E091	NM_018837.2	55959	5.11686	5.27053	5.21335	5.66107	5.37504	5.60585	1.84496	0.347072	1.27198
ILMN_1856480		cDNA clone IMAGE:5263177			NA	5.1375	5.22882	5.32912	5.57894	5.51728	5.64097	2.23217	0.347246	1.27213
ILMN_2106265	GDPD1	glycerophosphodiester phosphodiesterase domain containing 1 (GDPD1)	FLJ27503; UGPQ; FLJ37451; MGC35046; GDE4	NM_182569.1	284161	6.56834	6.61471	6.5345	7.02015	6.79442	6.94486	2.17033	0.347292	1.27217
ILMN_1731699	RAB15	RAB15, member RAS onocogene family (RAB15)		NM_198686.1	376267	6.25739	6.3837	6.47735	6.81634	6.72656	6.61765	1.97922	0.347369	1.27224
ILMN_2141941	TOR1AIP1	torsin A interacting protein 1 (TOR1AIP1)	MGC3413; LAP1B; DKFZP586G011; RP11-533E19.1; FLJ13142	NM_015602.2	26092	9.02514	9.0207	9.13494	9.56948	9.27891	9.37482	1.89885	0.347477	1.27233
ILMN_2111294	NUDT10	nudix (nucleoside diphosphate linked moiety X)-type motif 10 (NUDT10)	hDIPP3alpha; DIPP3a	NM_153183.1	170685	5.10434	5.2817	5.31107	5.71425	5.36807	5.65821	1.6183	0.347808	1.27263
ILMN_1791749	CLEC2L	PREDICTED: C-type lectin domain family 2, member L (CLEC2L)		XM_499478.3	154790	5.01792	4.99548	5.07039	5.50144	5.51728	5.10852	1.54429	0.347815	1.27263
ILMN_2045419	BNIP3L	BCL2/adenovirus E1B 19kDa interacting protein 3-like (BNIP3L)	BNIP3a; NIX	NM_004331.2	665	9.83226	10.1302	10.1271	10.4591	10.32	10.354	1.76577	0.347877	1.27269
ILMN_1654735	SLCO3A1	solute carrier organic anion transporter family, member 3A1 (SLCO3A1)	FLJ40478; SLC21A11; OATP-D; OATP3A1	NM_013272.2	28232	7.52121	7.39832	7.38716	7.73606	7.82273	7.79181	2.49301	0.347976	1.27277
ILMN_2380688	B4GALT4	UDP-Gal:betaGlcNAc beta 1,4- galactosyltransferase, polypeptide 4 (B4GALT4), transcript variant 2	B4Gal-T4; beta4Gal-T4	NM_003778.3	8702	6.60733	6.89482	6.77479	7.21432	6.97728	7.12928	1.75628	0.347982	1.27278
ILMN_2160906	MYCT1	myc target 1 (MYCT1)	FLJ21269; MGC156310; MGC156309; MTLC	NM_025107.1	80177	7.03672	7.17493	7.2317	7.52199	7.39489	7.57061	2.07434	0.34805	1.27284
ILMN_1719344	LOC730820	PREDICTED: similar to nuclear receptor binding factor 2 (LOC730820)		XM_001127763.1	730820	7.59768	7.62425	7.64818	8.10538	7.98071	7.82845	2.03476	0.348148	1.27293
ILMN_3251207	TMEM19	transmembrane protein 19 (TMEM19)	FLJ10936	NM_018279.3	55266	6.59395	6.53138	6.65249	6.96232	6.92006	6.94017	2.74761	0.34824	1.27301
ILMN_1744929	PTGER1	prostaglandin E receptor 1 (subtype EP1), 42kDa (PTGER1)	EP1	NM_000955.2	5731	5.32193	5.45943	5.60881	5.8505	5.84298	5.74147	1.93801	0.348259	1.27302
ILMN_1667561	IFRD1	interferon-related developmental regulator 1 (IFRD1), transcript variant 1	PC4; TIS7	NM_001550.2	3475	7.82273	7.81314	7.86171	8.30058	8.06985	8.17193	2.20289	0.348261	1.27303
ILMN_1683194	DCN	decorin (DCN), transcript variant A1	PGII; DSPG2; CSCD; PGS2; SLRR1B; PG40	NM_001920.3	1634	7.38111	7.36545	7.2182	7.52591	7.82655	7.6575	1.82393	0.3484	1.27315
ILMN_1773109	BAI2	brain-specific angiogenesis inhibitor 2 (BAI2)		NM_001703.2	576	5.20945	5.2211	5.31832	5.66676	5.44956	5.67807	2.02995	0.348505	1.27324
ILMN_1671116	C3orf21	chromosome 3 open reading frame 21 (C3orf21)	FLJ35155	NM_152531.3	152002	9.55842	9.50522	9.50779	9.79572	9.84062	9.98142	2.35231	0.348776	1.27348
ILMN_1807171	PLA2G5	phospholipase A2, group V (PLA2G5)	PLA2-10; GV-PLA2; hVPLA(2); DKFZp686C2294; MGC46205	NM_000929.2	5322	6.15178	6.0268	6.15583	6.43129	6.3837	6.56682	2.1957	0.349133	1.2738
ILMN_2332964	LGMN	legumain (LGMN), transcript variant 2	AEP; LGMN1; PRSC1	NM_001008530.1	5641	8.75121	8.58984	8.78921	8.89694	9.20579	9.07682	1.76528	0.349764	1.27435
ILMN_1833376		BX101207 Soares_total_fetus_Nb2HF8_9w cDNA clone IMAGp998I124211, mRNA sequence			NA	5.15381	5.42291	5.50779	5.85549	5.63517	5.64386	1.60223	0.350005	1.27457
ILMN_2198812	FDX1	ferredoxin 1 (FDX1), nuclear gene encoding mitochondrial protein	LOH11CR1D; ADX; FDX	NM_004109.3	2230	5.50144	5.38198	5.56071	5.76818	5.90448	5.82273	2.25319	0.350423	1.27493
ILMN_2234970	SLC39A3	solute carrier family 39 (zinc transporter), member 3 (SLC39A3), transcript variant 1	ZIP3	NM_144564.4	29985	9.00028	8.89542	8.78888	9.08561	9.35799	9.29232	1.82541	0.350444	1.27495
ILMN_1701933	SNCA	synuclein, alpha (non A4 component of amyloid precursor) (SNCA), transcript variant NACP112	PD1; NACP; PARK4; MGC110988; PARK1	NM_007308.1	6622	7.0607	7.26021	7.10119	7.48543	7.44708	7.54148	2.24071	0.350632	1.27512
ILMN_1688500	PCDH10	protocadherin 10 (PCDH10), transcript variant 1	MGC133344; DKFZP761O2023; PCDH19; OL-PCDH; KIAA1400	NM_032961.1	57575	6.01569	6.1918	6	6.29462	6.55152	6.41447	1.88647	0.351039	1.27548
ILMN_1741727	QPCT	glutaminyl-peptide cyclotransferase (QPCT)	QC; GCT	NM_012413.3	25797	9.16842	9.1179	9.15937	9.48059	9.47127	9.54824	2.96549	0.35147	1.27586
ILMN_1680274	LOC652694	PREDICTED: similar to Ig kappa chain V-I region HK102 precursor (LOC652694)		XM_942302.1	652694	6.37678	6.36982	6.34341	6.75087	6.70598	6.6879	3.16717	0.351584	1.27596
ILMN_1800602	GCA	grancalcin, EF-hand calcium binding protein (GCA)	GCL	NM_012198.2	25801	6.91528	6.94603	7.11478	7.37938	7.27705	7.37504	2.19667	0.351793	1.27615
ILMN_2347592	NMB	neuromedin B (NMB), transcript variant 1	MGC2277; MGC3936; MGC17211	NM_021077.3	4828	7.54767	7.47816	7.77545	7.9431	7.97671	7.93723	1.95156	0.35192	1.27626
ILMN_1691413	NNAT	neuronatin (NNAT), transcript variant 2	MGC1439; Peg5	NM_181689.1	4826	5.59395	5.52669	5.39917	5.83289	5.84549	5.89724	2.34429	0.351934	1.27627
ILMN_1730054	GSTT1	glutathione S-transferase theta 1 (GSTT1)		NM_000853.1	2952	8.07948	8.16541	8.01792	8.39532	8.54612	8.37721	2.2242	0.351946	1.27628
ILMN_2352023	RIPK5	receptor interacting protein kinase 5 (RIPK5), transcript variant 2	RIP5; DustyPK; HDCMD38P; KIAA0472	NM_199462.1	25778	7.95826	8.14006	8.10905	8.51175	8.40854	8.34341	2.14391	0.35211	1.27643
ILMN_1679640	FXR1	fragile X mental retardation, autosomal homolog 1 (FXR1), transcript variant 1		NM_005087.2	8087	9.31719	9.29531	9.21237	9.65589	9.53761	9.6886	2.42063	0.352408	1.27669
ILMN_1753342	SAT1	spermidine/spermine N1-acetyltransferase 1 (SAT1)	KFSD; SSAT-1; DC21; SSAT; SAT	NM_002970.1	6303	12.3245	12.4323	12.4533	12.8512	12.6361	12.7808	2.14319	0.352658	1.27691
ILMN_2352097	GPR56	G protein-coupled receptor 56 (GPR56), transcript variant 2	BFPP; DKFZp781L1398; TM7LN4; TM7XN1	NM_201524.1	9289	7.74349	7.67455	7.62717	8.00731	8.02846	8.0677	2.75952	0.352756	1.277
ILMN_1670490	PDPN	podoplanin (PDPN), transcript variant 4	Gp38; OTS8; T1A; PA2.26; GP40; GP36; T1A-2; HT1A-1	NM_001006625.1	10630	7.49506	7.49346	7.53916	7.72247	7.95187	7.91349	2.17853	0.353384	1.27755
ILMN_1794490	FLJ10781	hypothetical protein FLJ10781 (FLJ10781)		NM_018215.2	55228	5.43296	5.19377	5.24793	5.65535	5.58496	5.69488	2.09262	0.353512	1.27767
ILMN_1765204	ST13	suppression of tumorigenicity 13 (colon carcinoma) (Hsp70 interacting protein) (ST13)	HOP; FLJ27260; AAG2; SNC6; HSPABP; PRO0786; MGC129952; FAM10A4; P48; HSPABP1; HIP; FAM10A1	NM_003932.3	6767	9.37112	9.4731	9.52474	9.95463	9.64836	9.82671	1.86754	0.35358	1.27773
ILMN_1777745	FAM133B	family with sequence similarity 133, member B (FAM133B), transcript variant 2	MGC40405	NM_001040057.1	257415	7.19081	7.19771	7.08852	7.42038	7.58346	7.53528	2.36661	0.354024	1.27812
ILMN_3307791	FAM69A	family with sequence similarity 69, member A (FAM69A)	FLJ23493	NM_001006605.3	388650	8.28679	8.44874	8.41912	8.84768	8.60548	8.76487	2.00848	0.354464	1.27851
ILMN_1802411	ITGA1	integrin, alpha 1 (ITGA1)	CD49a; VLA1	NM_181501.1	3672	6.10643	6.11894	6.05745	6.37504	6.58496	6.38716	2.21332	0.354778	1.27879
ILMN_1762106	MMP2	matrix metallopeptidase 2 (gelatinase A, 72kDa gelatinase, 72kDa type IV collagenase) (MMP2)	TBE-1; CLG4A; CLG4; MMP-II; MONA	NM_004530.2	4313	7.62571	7.42038	7.50541	7.83352	7.85237	7.93133	2.27163	0.35524	1.2792
ILMN_1692199	RNF103	ring finger protein 103 (RNF103)	MGC41857; hkf-1; ZFP103; KF1; MGC102815	NM_005667.2	7844	8.59507	8.58346	8.5947	8.9507	8.90298	8.98527	3.11978	0.355242	1.2792
ILMN_3305942	LOC729970	PREDICTED: hypothetical LOC729970 (LOC729970)		XM_001134179.1	729970	6.21335	6.26679	6.40939	6.65821	6.59991	6.69766	2.29683	0.355421	1.27936
ILMN_1697639	OGT	O-linked N-acetylglucosamine (GlcNAc) transferase (UDP-N-acetylglucosamine:polypeptide-N-acetylglucosaminyl transferase) (OGT), transcript variant 2	O-GLCNAC; MGC22921; HRNT1; FLJ23071	NM_181673.1	8473	7.92125	7.99605	8.02237	8.22352	8.34961	8.43296	2.25406	0.355476	1.27941
ILMN_1742332	KCTD12	potassium channel tetramerisation domain containing 12 (KCTD12)	FLJ33073; KIAA1778; C13orf2; PFET1	NM_138444.3	115207	7.2182	7.06609	6.9331	7.47978	7.49586	7.30834	1.85547	0.355528	1.27945
ILMN_1654563	EFNB1	ephrin-B1 (EFNB1)	MGC8782; LERK2; CFNS; EFL3; CFND; EPLG2; Elk-L	NM_004429.3	1947	7.22786	7.0045	6.926	7.51175	7.40514	7.30834	1.80031	0.355625	1.27954
ILMN_1674442	LOC255130	PREDICTED: hypothetical LOC255130 (LOC255130)		XM_173119.5	255130	5.4822	5.16591	5.19377	5.64097	5.53294	5.73606	1.72321	0.356028	1.2799
ILMN_2294978	RNASE4	ribonuclease, RNase A family, 4 (RNASE4), transcript variant 1	RNS4; MGC9306	NM_194430.1	6038	6.39232	6.17193	6.48704	6.65964	6.59842	6.86171	1.67726	0.356163	1.28002
ILMN_3227321	LOC731542	PREDICTED: misc_RNA (LOC731542), miscRNA.		XR_015517.2	731542	11.6643	11.6927	11.6749	12.319	11.8983	11.8837	1.53168	0.356369	1.2802
ILMN_1691341	IL7R	PREDICTED: interleukin 7 receptor (IL7R)		XM_937367.1	3575	5.51728	5.79701	5.61176	5.97499	6.01346	6.00675	2.06338	0.356382	1.28021
ILMN_1664912	IL11RA	interleukin 11 receptor, alpha (IL11RA), transcript variant 1	MGC2146	NM_004512.3	3590	7.81442	7.72383	7.62059	8.14466	8.19131	7.89239	1.79933	0.356505	1.28032
ILMN_1655702	ABHD5	abhydrolase domain containing 5 (ABHD5)	MGC8731; CGI58; CDS; NCIE2; IECN2	NM_016006.3	51099	7.12928	7.34607	7.224	7.65392	7.45615	7.65964	1.96655	0.356784	1.28057
ILMN_1765829	NUFIP2	nuclear fragile X mental retardation protein interacting protein 2 (NUFIP2)	82-FIP; PIG1; KIAA1321; MGC117262; FIP-82; 182-FIP	NM_020772.1	57532	7.58195	7.51412	7.40088	8.06447	7.76752	7.73539	1.72354	0.356809	1.28059
ILMN_2189371	NTNG1	netrin G1 (NTNG1), transcript variant 3	Lmnt1; KIAA0976	NM_014917.2	22854	4.7761	5.02237	5.03562	5.45943	5.19771	5.24793	1.73197	0.356991	1.28075
ILMN_1718069	MIS12	MIS12, MIND kinetochore complex component, homolog (S. pombe) (MIS12)	MTW1; hMis12; MGC2488; 2510025F08Rik; KNTC2AP	NM_024039.1	79003	8.46761	8.44584	8.5691	8.93369	8.84768	8.77215	2.38193	0.356993	1.28075
ILMN_2146372	KCTD6	potassium channel tetramerisation domain containing 6 (KCTD6)	MGC27385	NM_153331.2	200845	7.87283	7.633	7.8586	8.18686	8.03397	8.21578	1.92451	0.357393	1.28111
ILMN_3207490	LOC441896	PREDICTED: misc_RNA (LOC441896), partial miscRNA.		XR_038885.1	441896	6.85549	7.21335	7.18388	7.49745	7.27984	7.54767	1.54852	0.357413	1.28113
ILMN_2087646	HLX	H2.0-like homeobox (HLX)	HB24; HLX1	NM_021958.2	3142	6.22689	5.9542	6.02459	6.54226	6.47086	6.26491	1.73269	0.357452	1.28116
ILMN_1797372	C3orf58	chromosome 3 open reading frame 58 (C3orf58)	MGC33365	NM_173552.2	205428	7.02237	7.02015	7.12928	7.51412	7.36194	7.36894	2.36905	0.357737	1.28141
ILMN_3262936	LCLAT1	lysocardiolipin acyltransferase 1 (LCLAT1), transcript variant 1	ALCAT1; FLJ37965; UNQ1849	NM_182551.3	253558	7.09381	7.30104	7.51885	7.76752	7.50859	7.71081	1.51955	0.357738	1.28142
ILMN_1724480	AXIN2	axin 2 (conductin, axil) (AXIN2)	MGC126582; DKFZp781B0869; AXIL	NM_004655.2	8313	5.85798	5.93782	5.848	6.1918	6.24793	6.27798	2.80258	0.357973	1.28162
ILMN_2405018	PPP1CB	protein phosphatase 1, catalytic subunit, beta isoform (PPP1CB), transcript variant 3	PP-1B; PPP1CD; MGC3672	NM_206876.1	5500	9.27682	9.25432	9.17592	9.74096	9.54824	9.49205	2.09338	0.358064	1.2817
ILMN_1675656	PPFIBP2	PTPRF interacting protein, binding protein 2 (liprin beta 2) (PPFIBP2)	Cclp1; MGC42541; DKFZp781K06126	NM_003621.1	8495	8.09487	8.25692	8.08534	8.42878	8.57099	8.51333	2.25537	0.35866	1.28223
ILMN_1708147	TBPL1	TBP-like 1 (TBPL1)	TRF2; STUD; MGC:9620; TLF; TLP; MGC:8389	NM_004865.2	9519	9.2114	9.43879	9.22858	9.6779	9.5588	9.71819	2.0257	0.358706	1.28228
ILMN_1911605		mRNA; cDNA DKFZp686I05206 (from clone DKFZp686I05206)			NA	7.54767	7.75556	7.71905	8.03232	7.97384	8.09276	2.20977	0.358884	1.28243
ILMN_1741917	OSCAR	osteoclast associated, immunoglobulin-like receptor (OSCAR), transcript variant 3	MGC33613; PIGR3	NM_130771.3	126014	6.83162	6.732	6.58195	7.06286	7.02015	7.14057	2.10903	0.359334	1.28283
ILMN_1813400	CBR4	carbonyl reductase 4 (CBR4)	FLJ14431	NM_032783.3	84869	6.37504	6.42291	6.38888	6.75221	6.85175	6.66107	2.45195	0.359401	1.28289
ILMN_2146418	CRIM1	cysteine rich transmembrane BMP regulator 1 (chordin-like) (CRIM1)	MGC138194; S52	NM_016441.1	51232	7.70943	7.74349	7.80219	7.97097	8.21383	8.14924	2.15072	0.359644	1.28311
ILMN_1761044	GNB1L	guanine nucleotide binding protein (G protein), beta polypeptide 1-like (GNB1L)	GY2; DGCRK3; WDR14; KIAA1645; WDVCF; FKSG1	NM_053004.2	54584	6.50462	6.56071	6.64674	6.91767	7.03342	6.84046	2.25789	0.359828	1.28327
ILMN_3213185	LOC645452	PREDICTED: similar to hCG1782414 (LOC645452)		XM_939733.2	645452	9.68299	9.75956	9.67684	10.2187	9.95696	10.024	2.08649	0.360095	1.28351
ILMN_1677198	C1R	complement component 1, r subcomponent (C1R)		NM_001733.4	715	8.30697	8.17493	8.1819	8.54767	8.71665	8.48018	2.09333	0.360234	1.28363
ILMN_1681886	ADAMTS5	ADAM metallopeptidase with thrombospondin type 1 motif, 5 (aggrecanase-2) (ADAMTS5)	ADAMTS11; FLJ36738; ADMP-2	NM_007038.2	11096	5.04002	5.09592	5.19377	5.47249	5.49506	5.44294	2.62759	0.360258	1.28366
ILMN_1876924	WNK1	WNK lysine deficient protein kinase 1 (WNK1)	PHA2C; PRKWNK1; KDP; KIAA0344	NM_018979.2	65125	8.0864	8.16742	8.21335	8.66782	8.33226	8.54805	1.85096	0.360322	1.28371
ILMN_1787193	CYP2S1	cytochrome P450, family 2, subfamily S, polypeptide 1 (CYP2S1)		NM_030622.6	29785	5.91648	5.52669	5.66107	6.06178	6.0045	6.11894	1.72653	0.360327	1.28372
ILMN_1748751	NLF2	PREDICTED: nuclear localized factor 2 (NLF2)		XM_940314.2	388125	5.42626	5.33628	5.30012	5.70044	5.87036	5.57289	1.9618	0.360341	1.28373
ILMN_2185984	SASH1	SAM and SH3 domain containing 1 (SASH1)	RP3-323M4.1; dJ323M4; dJ323M4.1; KIAA0790; SH3D6A	NM_015278.3	23328	7.80413	7.94369	8.00056	8.36282	8.24508	8.22159	2.21618	0.360368	1.28375
ILMN_1697189	PNCK	pregnancy upregulated non-ubiquitously expressed CaM kinase (PNCK)	MGC45419; CaMK1b; BSTK3	NM_001039582.1	139728	5.99095	6.18982	6.22497	6.67948	6.36457	6.44294	1.72323	0.360417	1.2838
ILMN_1692219	RAB11FIP1	RAB11 family interacting protein 1 (class I) (RAB11FIP1), transcript variant 3	FLJ22622; MGC78448; DKFZp686E2214; rab11-FIP1; RCP; FLJ22524; NOEL1A	NM_001002814.1	80223	7.64818	7.86913	7.69349	8.21432	7.95478	8.12309	1.88439	0.360463	1.28384
ILMN_2388177	SPATA7	spermatogenesis associated 7 (SPATA7), transcript variant 1	MGC102934; DKFZp686D07199; HSD3; HSD-3.1	NM_018418.2	55812	7.04221	7.00562	7.20555	7.57894	7.34252	7.41363	1.97159	0.360569	1.28393
ILMN_1668247	LTC4S	leukotriene C4 synthase (LTC4S)	MGC33147	NM_145867.1	4056	5.36107	5.55459	5.53294	5.78136	6	5.74953	1.90446	0.360766	1.28411
ILMN_2090004	AQP10	aquaporin 10 (AQP10)	AQPA_HUMAN	NM_080429.2	89872	5.35755	5.3147	5.34341	5.69209	5.67525	5.73064	3.26824	0.360776	1.28412
ILMN_1786976	RAB22A	RAB22A, member RAS oncogene family (RAB22A)	MGC16770	NM_020673.2	57403	8.54187	8.63263	8.5345	8.88631	8.94924	8.95623	2.81294	0.360927	1.28425
ILMN_2252408	CNPY4	canopy 4 homolog (zebrafish) (CNPY4)	MGC40499; PRAT4B	NM_152755.1	245812	7.97327	7.89178	8.03452	8.36238	8.23122	8.38888	2.34974	0.360969	1.28429
ILMN_2219437	PRRG4	proline rich Gla (G-carboxyglutamic acid) 4 (transmembrane) (PRRG4)	PRGP4; TMG4	NM_024081.4	79056	6.2114	6.08746	6.28725	6.80993	6.43796	6.42122	1.57433	0.360999	1.28431
ILMN_1696270	PLAG1	pleiomorphic adenoma gene 1 (PLAG1)	PSA; SGPA	NM_002655.1	5324	6.38543	6.39917	6.37851	6.89845	6.58045	6.76818	1.98305	0.361323	1.2846
ILMN_1796244	CD2BP2	CD2 (cytoplasmic tail) binding protein 2 (CD2BP2)	FWP010; LIN1; Snu40	NM_006110.1	10421	9.70529	9.90041	9.86155	10.0779	10.2712	10.2029	2.10306	0.361573	1.28483
ILMN_1797693	BRI3BP	BRI3 binding protein (BRI3BP)	HCCR-2; BNAS1; KG19	NM_080626.5	140707	6.13134	6.3147	6.3345	6.51412	6.70874	6.64241	2.0545	0.361579	1.28483
ILMN_1738684	NRXN2	neurexin 2 (NRXN2), transcript variant beta	FLJ40892; KIAA0921	NM_138734.1	9379	5.69766	5.60288	5.54844	5.80993	6.01123	6.1127	1.9155	0.361624	1.28487
ILMN_1729117	COL5A2	collagen, type V, alpha 2 (COL5A2)	MGC105115	NM_000393.3	1290	11.4205	11.5851	11.4095	11.9755	11.6524	11.8731	1.80391	0.361956	1.28517
ILMN_1705849	SPR	sepiapterin reductase (7,8-dihydrobiopterin:NADP+ oxidoreductase) (SPR)		NM_003124.3	6697	7.11166	6.88509	7.16892	7.40088	7.4271	7.42375	2.04812	0.362021	1.28522
ILMN_1658494	C13orf15	chromosome 13 open reading frame 15 (C13orf15)	RGC-32; KIAA0564; bA157L14.2; MGC87338; RGC32	NM_014059.2	28984	5.65249	5.74416	5.6837	5.9331	5.97499	6.26115	1.84957	0.362966	1.28607
ILMN_2053281	C14orf149	chromosome 14 open reading frame 149 (C14orf149)	FLJ25436	NM_144581.1	112849	9.5919	9.40748	9.41743	9.76122	9.86217	9.88249	2.26378	0.363025	1.28612
ILMN_1798006	ANKRD35	ankyrin repeat domain 35 (ANKRD35)	MGC126667; FLJ25124; MGC126669	NM_144698.2	148741	6.6851	6.92719	6.89724	7.22882	7.0917	7.27984	1.97215	0.363612	1.28664
ILMN_1812666	DNAJC15	DnaJ (Hsp40) homolog, subfamily C, member 15 (DNAJC15)	MCJ; DNAJD1; HSD18	NM_013238.2	29103	8.16993	8.22159	8.15381	8.60585	8.44087	8.59021	2.49016	0.363871	1.28687
ILMN_1699631	GATS	opposite strand transcription unit to STAG3 (GATS)	DKFZp686B07267	NM_178831.4	352954	6.48382	6.6279	6.47573	6.97384	6.8009	6.90448	2.27179	0.363926	1.28692
ILMN_1758941	REEP5	receptor accessory protein 5 (REEP5)	MGC70440; DP1; D5S346; TB2; C5orf18	NM_005669.4	7905	9.8895	9.89345	9.96275	10.2861	10.227	10.3244	2.87251	0.363936	1.28693
ILMN_2402936	LOC440926	H3 histone, family 3A pseudogene (LOC440926), non-coding RNA.		NR_002315.1	440926	9.12102	9.56262	9.41954	9.7046	9.6793	9.81154	1.61128	0.364085	1.28707
ILMN_1786353	CNGA1	cyclic nucleotide gated channel alpha 1 (CNGA1)	CNCG1; CNCG; RCNCalpha; RCNCa; RCNC1; CNG1	NM_000087.2	1259	5.10014	5.36807	5.36107	5.82782	5.54844	5.54535	1.66773	0.364111	1.28709
ILMN_2156936	SCCPDH	saccharopine dehydrogenase (putative) (SCCPDH)	CGI-49; RP11-439E19.2; FLJ43187	NM_016002.2	51097	6.0917	6.2075	6.12516	6.6837	6.39917	6.43463	1.96312	0.364379	1.28733
ILMN_1701017	SAA1	serum amyloid A1 (SAA1), transcript variant 1	MGC111216; SAA; PIG4; TP53I4	NM_000331.3	6288	5.86295	6.02459	6.12102	6.3505	6.17991	6.57289	1.61372	0.364916	1.28781
ILMN_2081087	HSPA12A	heat shock 70kDa protein 12A (HSPA12A)	KIAA0417; FLJ13874	NM_025015.2	259217	6.98641	6.97499	7.04767	7.37069	7.31651	7.41701	2.88606	0.365045	1.28792
ILMN_1748434	LOC283683	PREDICTED: hypothetical protein LOC283683, transcript variant 3 (LOC283683)		XM_931224.1	283683	5.38888	5.59694	5.51728	6.11686	5.64386	5.83794	1.52311	0.365191	1.28805
ILMN_3307729	CXXC5	CXXC finger 5 (CXXC5)	HSPC195	NM_016463.7	51523	8.88722	8.93251	8.83162	9.24816	9.24722	9.25267	3.07377	0.365564	1.28838
ILMN_1675803	LOC285550	PREDICTED: misc_RNA (LOC285550), miscRNA.		XR_017764.1	285550	6.51412	6.56377	6.61765	7.06393	6.80607	6.92362	2.1529	0.366028	1.2888
ILMN_1773865	HSPA5	heat shock 70kDa protein 5 (glucose-regulated protein, 78kDa) (HSPA5)	BIP; FLJ26106; MIF2; GRP78	NM_005347.2	3309	9.32643	9.36785	9.53838	9.75255	9.81202	9.7662	2.33121	0.366033	1.2888
ILMN_2140510	KLHL13	kelch-like 13 (Drosophila) (KLHL13)	BKLHD2; FLJ10262; MGC74791; KIAA1309	NM_033495.2	90293	6.02015	6.1375	6.20945	6.67807	6.34341	6.4446	1.80347	0.366326	1.28907
ILMN_1688404	ZMYM4	zinc finger, MYM-type 4 (ZMYM4)	KIAA0425; DKFZp686B09210; CDIR; ZNF198L3; DKFZp686L0547; ZNF262; MYM	NM_005095.2	9202	7.40429	7.47005	7.56453	8.06124	7.71356	7.76354	1.76386	0.36649	1.28921
ILMN_2054652	TYRP1	tyrosinase-related protein 1 (TYRP1)	GP75; CATB; TRP; b-PROTEIN; TYRP; CAS2	NM_000550.1	7306	5.3147	5.49506	5.22882	5.76553	5.67243	5.70044	2.12076	0.36661	1.28932
ILMN_1804673	SLC16A4	solute carrier family 16, member 4 (monocarboxylic acid transporter 5) (SLC16A4)	MCT5; MCT4	NM_004696.1	9122	7.10538	7.23458	6.96578	7.49185	7.40684	7.507	2.11513	0.36665	1.28936
ILMN_1783182	FBN1	fibrillin 1 (FBN1)	FBN; WMS; MFS1; OCTD; MASS; SGS	NM_000138.3	2200	6.90689	7.02901	7.02015	7.46842	7.25172	7.33718	2.23856	0.367089	1.28975
ILMN_1794534	CCDC81	coiled-coil domain containing 81 (CCDC81)	FLJ16339; FLJ23514	NM_021827.3	60494	5.53294	5.62059	5.57894	5.97269	5.94486	5.91648	3.06564	0.367187	1.28984
ILMN_1774132	MAP6	microtubule-associated protein 6 (MAP6), transcript variant 1	KIAA1878; MTAP6; STOP; FLJ41346; N-STOP	NM_033063.1	4135	5.27798	5.70874	5.43296	5.89482	5.79442	5.83289	1.67779	0.36748	1.2901
ILMN_2345142	SULF2	sulfatase 2 (SULF2), transcript variant 1	MGC126411; FLJ90554; KIAA1247; HSULF-2; DKFZp313E091	NM_018837.2	55959	5.14568	5.18982	5.22497	5.41616	5.61765	5.62936	2.26048	0.367568	1.29018
ILMN_2376625	VHL	von Hippel-Lindau tumor suppressor (VHL), transcript variant 2	HRCA1; RCA1; VHL1	NM_198156.1	7428	7.06609	7.30287	7.21043	7.72588	7.61839	7.33807	1.63924	0.367649	1.29025
ILMN_1720865	OSBPL7	oxysterol binding protein-like 7 (OSBPL7), transcript variant 1	MGC71150; ORP7	NM_145798.2	114881	6.47897	6.68089	6.58496	7.09381	6.85922	6.89482	2.00773	0.367678	1.29027
ILMN_3237589	PHAX	phosphorylated adaptor for RNA export (PHAX)	FLJ13193; PHAX	NM_032177.2	51808	8.07735	8.22689	8.09329	8.56148	8.49386	8.44584	2.48927	0.367883	1.29046
ILMN_3195203	C17orf101	chromosome 17 open reading frame 101 (C17orf101), transcript variant 2		NM_175902.3	79701	6.82273	6.848	6.82528	7.23936	7.27426	7.0864	2.48731	0.368006	1.29057
ILMN_1813175	LPHN1	latrophilin 1 (LPHN1), transcript variant 2	CL1; CIRL1; LEC2	NM_014921.3	22859	6.05961	5.77083	5.88753	6.11061	6.33985	6.37156	1.77656	0.368018	1.29058
ILMN_2196588	C18orf32	chromosome 18 open reading frame 32 (C18orf32)	FLJ23458	NM_001035005.2	497661	8.58346	8.89724	8.82273	9.17368	8.99972	9.2341	1.77288	0.368022	1.29058
ILMN_1693009	FGL2	fibrinogen-like 2 (FGL2)	pT49; T49	NM_006682.1	10875	6.52042	6.22304	6.36107	6.67666	6.74685	6.7866	2.03109	0.368528	1.29103
ILMN_3244521	LOC283267	hypothetical LOC283267 (LOC283267), non-coding RNA.		NR_015451.1	283267	7.84046	7.85611	7.66605	8.14006	8.20555	8.1236	2.37114	0.368864	1.29134
ILMN_2183216	TTRAP	TRAF and TNF receptor associated protein (TTRAP)	EAP2; AD022; MGC111021; MGC9099; dJ30M3.3; RP1-30M3.3	NM_016614.2	51567	6.96	6.97384	7.14771	7.49346	7.24793	7.44708	1.98108	0.36897	1.29143
ILMN_3237381	TMEM217	transmembrane protein 217 (TMEM217)	dJ355M6.2	NM_145316.2	221468	5.45943	5.56377	5.45615	5.80735	5.853	5.926	2.65218	0.369001	1.29146
ILMN_1691846	G0S2	G0/G1switch 2 (G0S2)	RP1-28O10.2	NM_015714.2	50486	6.07895	6.01123	5.87036	6.10643	6.43463	6.52669	1.5958	0.369071	1.29152
ILMN_1810875	SYNGR1	synaptogyrin 1 (SYNGR1), transcript variant 1a	MGC:1939	NM_004711.3	9145	6.65964	6.79181	6.60733	7.01903	7.08321	7.06393	2.4975	0.369133	1.29158
ILMN_1688630	RECK	reversion-inducing-cysteine-rich protein with kazal motifs (RECK)	ST15; hRECK	NM_021111.1	8434	8.22882	8.26444	8.25361	8.53605	8.57213	8.74651	2.37418	0.369276	1.2917
ILMN_1813688	GKN2	gastrokine 2 (GKN2)	GDDR; VLTI465; PRO813; TFIZ1	NM_182536.2	200504	5.14975	5.39917	5.40259	5.71973	5.61176	5.72792	2.03574	0.369303	1.29173
ILMN_1771261	SYNC1	syncoilin, intermediate filament 1 (SYNC1)	SYNC; MGC149626; SYNCOILIN; MGC149625	NM_030786.1	81493	9.80735	9.99633	9.92941	10.5574	10.1171	10.1672	1.54315	0.369522	1.29192
ILMN_1813139	ANKDD1A	ankyrin repeat and death domain containing 1A (ANKDD1A)	MGC120306; FLJ25870; MGC120307; MGC120305	NM_182703.3	348094	6.01123	6.18587	6.12722	6.3906	6.51254	6.52982	2.35113	0.369549	1.29195
ILMN_1674551	SMAD5	SMAD family member 5 (SMAD5), transcript variant 1	Dwfc; DKFZp781O1323; MADH5; JV5-1; DKFZp781C1895	NM_005903.5	4090	8.85643	8.96261	9.02181	9.39189	9.22786	9.33024	2.34376	0.369715	1.2921
ILMN_1848552		mRNA; cDNA DKFZp686F09166 (from clone DKFZp686F09166)			NA	10.7391	10.7253	10.6808	11.2395	11.0276	10.9873	2.17644	0.369729	1.29211
ILMN_2351638	BEX4	BEX family member 4 (BEX4)	BEXL1; BEX4; FLJ10097	NM_001080425.1	56271	6.20163	6.48543	6.35403	6.76421	6.60288	6.78398	1.94965	0.369994	1.29235
ILMN_2230566	RAB40B	RAB40B, member RAS oncogene family (RAB40B)	FLJ42385; SEC4L; RAR	NM_006822.1	10966	7.74281	7.73742	7.90147	8.25644	8.05257	8.18339	2.17745	0.370233	1.29256
ILMN_1727156	ARSI	arylsulfatase family, member I (ARSI)	FLJ16069	NM_001012301.1	340075	5.29278	5.14975	5.2817	5.53605	5.71699	5.58195	2.30204	0.370257	1.29258
ILMN_2391150	FILIP1L	filamin A interacting protein 1-like (FILIP1L), transcript variant 3	DOC-1; GIP90; DOC1	NM_001042459.1	11259	8.50462	8.16892	8.06824	8.61397	8.61985	8.61949	1.67166	0.37051	1.29281
ILMN_1745497	C12orf26	chromosome 12 open reading frame 26 (C12orf26)	FLJ22789	NM_032230.1	84190	8.12309	8.35799	8.43212	8.77149	8.49466	8.75889	1.68914	0.370611	1.2929
ILMN_1741021	CH25H	cholesterol 25-hydroxylase (CH25H)	C25H	NM_003956.3	9023	5.05745	5.2555	5.31832	5.61471	5.64386	5.48543	2.03606	0.370908	1.29317
ILMN_1670145	DFNA5	deafness, autosomal dominant 5 (DFNA5), transcript variant 1	ICERE-1	NM_004403.2	1687	10.0681	10.1653	10.2299	10.7124	10.2896	10.5746	1.6656	0.371072	1.29331
ILMN_1711439	EMILIN1	elastin microfibril interfacer 1 (EMILIN1)	EMILIN-1; EMILIN; gp115; DKFZP586M121	NM_007046.1	11117	7.91409	7.86171	7.6865	8.16038	8.20457	8.21237	2.31718	0.371676	1.29385
ILMN_1758623	HIST1H2BD	histone cluster 1, H2bd (HIST1H2BD), transcript variant 2	H2B.1B; HIRIP2; MGC90432; dJ221C16.6; H2B/b; H2BFB	NM_138720.1	3017	6.96578	7.03452	6.87897	7.24413	7.38024	7.37069	2.43798	0.371926	1.29408
ILMN_1742611	C1orf52	chromosome 1 open reading frame 52 (C1orf52)	RP11-234D19.1; gm117; FLJ44982	NM_198077.2	148423	7.86171	8.02735	8.20994	8.49625	8.33181	8.38672	1.84777	0.37193	1.29408
ILMN_1751062	SCARA5	scavenger receptor class A, member 5 (putative) (SCARA5)	MGC45780; Tesr; FLJ23907	NM_173833.4	286133	5.40599	5.12516	5.53605	5.76818	5.60585	5.80993	1.64714	0.372254	1.29437
ILMN_2409754	PRR5	proline rich 5 (renal) (PRR5), transcript variant 4	PP610; FLJ20185	NM_001017530.1	55615	5.26303	5.2854	5.1416	5.79961	5.52356	5.48543	1.88018	0.372854	1.29491
ILMN_3245600	LRRC37B2	leucine rich repeat containing 37, member B2 (LRRC37B2), non-coding RNA.	DKFZp667M2411	NR_015341.1	147172	9.53099	9.48099	9.55248	10.0711	9.80558	9.80735	2.06847	0.373179	1.2952
ILMN_1738987	HS2ST1	heparan sulfate 2-O-sulfotransferase 1 (HS2ST1)	FLJ11317; MGC131986; dJ604K5.2; KIAA0448	NM_012262.2	9653	6.50621	6.69488	6.65535	7.13648	6.85425	6.98641	1.97191	0.373565	1.29555
ILMN_1657145	MEOX1	mesenchyme homeobox 1 (MEOX1), transcript variant 3	MOX1	NM_001040002.1	4222	5.40939	5.41278	5.39575	5.65821	5.76288	5.91886	2.25832	0.374011	1.29595
ILMN_1809400	FAM49B	family with sequence similarity 49, member B (FAM49B)	L1; DKFZp686B04128; BM-009	NM_016623.3	51571	6.96578	7.08534	7.09487	7.56453	7.35226	7.35138	2.1763	0.374061	1.296
ILMN_1697919	WHSC1L1	Wolf-Hirschhorn syndrome candidate 1-like 1 (WHSC1L1), transcript variant short	pp14328; DKFZp667H044; NSD3; FLJ20353; MGC126766; MGC142029	NM_017778.2	54904	5.54844	5.59694	5.45943	5.81762	5.99774	5.91169	2.40593	0.374085	1.29602
ILMN_1774251	ZNF155	zinc finger protein 155 (ZNF155), transcript variant 1	MGC161655; pHZ-96	NM_003445.2	7711	5.22497	5.42291	5.42962	5.80219	5.70321	5.69488	2.26601	0.374266	1.29618
ILMN_3247023	FLJ22536	hypothetical locus LOC401237 (FLJ22536), non-coding RNA.		NR_015410.1	401237	7.43212	7.37243	7.31198	7.68159	7.74214	7.81634	2.63976	0.374515	1.2964
ILMN_1682428	C1orf59	chromosome 1 open reading frame 59 (C1orf59)	MGC111091; RP11-256E16.2; FLJ30525	NM_144584.1	113802	6.56529	6.67807	6.63662	7.03122	6.86295	7.11166	2.20696	0.375278	1.29709
ILMN_1889752		mRNA full length insert cDNA clone EUROIMAGE 966164			NA	6.78136	6.6837	6.4446	7.16792	6.8125	7.05528	1.59971	0.375348	1.29715
ILMN_3245314	LOC100133999	PREDICTED: hypothetical protein LOC100133999 (LOC100133999)		XM_001716785.1	100133999	7.42962	7.31832	7.17393	7.507	7.88874	7.65249	1.68128	0.375457	1.29725
ILMN_1704369	LIMA1	LIM domain and actin binding 1 (LIMA1)	SREBP3; EPLIN; FLJ38853; MGC131726	NM_016357.3	51474	9.54593	9.73268	9.58721	9.9928	9.90614	10.0934	2.23466	0.375511	1.2973
ILMN_1712298	ANKRD46	ankyrin repeat domain 46 (ANKRD46)		NM_198401.2	157567	6.97613	6.824	6.94134	7.32823	7.24222	7.29829	2.64281	0.375753	1.29752
ILMN_1760688	SAMD14	sterile alpha motif domain containing 14 (SAMD14)	FLJ36890	NM_174920.2	201191	5.77083	6.08958	5.9331	6.32193	6.36982	6.23074	1.97686	0.376324	1.29803
ILMN_1725387	TMEM200A	transmembrane protein 200A (TMEM200A)	TTMC	NM_052913.2	114801	5.9472	5.926	6.06824	6.42459	6.29829	6.34873	2.55854	0.376722	1.29839
ILMN_2407824	ATP1B1	ATPase, Na+/K+ transporting, beta 1 polypeptide (ATP1B1), transcript variant 2	MGC1798; ATP1B	NM_001001787.1	481	9.96203	9.78807	9.76918	10.4094	10.0301	10.2102	1.75042	0.376807	1.29846
ILMN_3306730	RBM47	RNA binding motif protein 47 (RBM47), transcript variant 2	DKFZp686F02235; FLJ21344; FLJ20273; FLJ21643	NM_019027.3	54502	6.01123	6.06824	5.88753	6.46761	6.2075	6.42291	2.02578	0.377007	1.29864
ILMN_1679217	FAM110B	family with sequence similarity 110, member B (FAM110B)	FAM110B; MGC39325; C8orf72	NM_147189.2	90362	6.34873	6.06393	6.08321	6.47897	6.60585	6.54226	1.99903	0.377068	1.2987
ILMN_3219344	LOC100132805	PREDICTED: similar to predicted protein (LOC100132805)		XM_001719188.1	100132805	6.64962	6.72928	6.74416	7.08321	7.05637	7.11478	3.05179	0.377102	1.29873
ILMN_1749213	SDF2L1	stromal cell-derived factor 2-like 1 (SDF2L1)		NM_022044.2	23753	9.49486	9.52415	9.48724	9.79116	10.0188	9.82766	2.33982	0.377112	1.29874
ILMN_2192281	CARD8	caspase recruitment domain family, member 8 (CARD8)	NDPP1; CARDINAL; TUCAN; KIAA0955; MGC57162; DKFZp779L0366; DACAR	NM_014959.1	22900	5.74147	5.61176	5.44956	5.99095	5.91648	6.0268	2.09313	0.377147	1.29877
ILMN_2415179	CLSTN1	calsyntenin 1 (CLSTN1), transcript variant 1	CSTN1; PIK3CD; XB31alpha; KIAA0911; FLJ32258; alcalpha2; alcalpha1	NM_001009566.1	22883	10.6488	10.5893	10.6898	11.2174	10.8896	10.9529	1.94237	0.377304	1.29891
ILMN_1703886	SLC16A2	solute carrier family 16, member 2 (monocarboxylic acid transporter 8) (SLC16A2)	DXS128E; DXS128; MCT8; AHDS; XPCT; MCT7	NM_006517.2	6567	7.61692	7.34518	7.35315	7.96405	7.83605	7.64818	1.73476	0.377678	1.29925
ILMN_1863592		cDNA FLJ24018 fis, clone LNG14339			NA	5.66107	5.84046	5.70874	6.22882	6.01346	6.10224	2.19733	0.378084	1.29961
ILMN_2366041	ITM2C	integral membrane protein 2C (ITM2C), transcript variant 2	E25; ITM3; BRI3; E25C; BRICD2C	NM_001012516.1	81618	9.27566	9.19967	9.11009	9.45533	9.668	9.59712	2.24619	0.378341	1.29985
ILMN_1703279	CXorf57	chromosome X open reading frame 57 (CXorf57)	RP11-647M7.1; FLJ10178; FLJ14191	NM_018015.4	55086	5.57592	5.47249	5.55152	5.92125	5.8125	6.00225	2.47634	0.378692	1.30016
ILMN_1720998	CA12	carbonic anhydrase XII (CA12), transcript variant 1	FLJ20151; CAXII; HsT18816	NM_001218.3	771	9.82766	9.90674	9.83273	10.1764	10.3929	10.134	2.17872	0.378728	1.3002
ILMN_1793002	C20orf196	chromosome 20 open reading frame 196 (C20orf196)	FLJ25067; RP4-784N16.1	NM_152504.2	149840	5.36807	5.60288	5.69488	6.08534	5.82782	5.88996	1.77021	0.379095	1.30053
ILMN_1712505	KDELC1	KDEL (Lys-Asp-Glu-Leu) containing 1 (KDELC1)	KDEL1; EP58; MGC5302	NM_024089.1	79070	7.22882	7.12722	7.44211	7.6886	7.49265	7.75422	1.79423	0.379107	1.30054
ILMN_2185728	SFRP4	secreted frizzled-related protein 4 (SFRP4)	FRPHE; MGC26498; FRP-4	NM_003014.2	6424	5.78398	5.82528	5.74416	5.88509	6.1918	6.41447	1.54856	0.379314	1.30072
ILMN_1801584	CXCR4	chemokine (C-X-C motif) receptor 4 (CXCR4), transcript variant 2	WHIM; NPYR; NPY3R; NPYY3R; HM89; HSY3RR; FB22; LAP3; NPYRL; D2S201E; CD184; LESTR; LCR1	NM_003467.2	7852	5.75221	5.77083	5.6837	6.10014	6.16993	6.07468	2.94976	0.379333	1.30074
ILMN_2351548	FAIM	Fas apoptotic inhibitory molecule (FAIM), transcript variant 3	FAIM1	NM_001033032.1	55179	6.49185	6.64386	6.73742	7.16189	6.84172	7.00899	1.8383	0.379824	1.30118
ILMN_3251145	LDHA	lactate dehydrogenase A (LDHA), transcript variant 1		NM_005566.3	3939	8.30834	8.37851	8.27798	8.86419	8.56224	8.67878	2.08256	0.380123	1.30145
ILMN_1801441	RFTN2	raftlin family member 2 (RFTN2)	C2orf11; MGC117313; Raftlin-2; FLJ30574	NM_144629.1	130132	6.10643	5.9331	5.98185	6.45121	6.31832	6.39232	2.46754	0.380153	1.30148
ILMN_2118832	RBM24	RNA binding motif protein 24 (RBM24)	FLJ37697; RNPC6; FLJ30829; dJ259A10.1; FLJ26355	NM_153020.1	221662	6.34873	6.54535	6.67807	6.96809	6.80219	6.94251	1.91652	0.380216	1.30154
ILMN_1819854		full-length cDNA clone CS0DA009YB08 of Neuroblastoma of (human)			NA	5.29278	5.15381	5.30378	5.70874	5.50144	5.68089	2.22837	0.380232	1.30155
ILMN_1700515	C17orf58	chromosome 17 open reading frame 58 (C17orf58), transcript variant 2	MGC138278	NM_181656.3	284018	7.8189	7.72451	7.67807	8.02846	8.21529	8.11894	2.41179	0.380401	1.3017
ILMN_1680624	CREG1	cellular repressor of E1A-stimulated genes 1 (CREG1)	CREG	NM_003851.2	8804	8.8205	8.68229	8.59021	9.18488	9.00085	9.04876	2.1569	0.380492	1.30179
ILMN_1773553	FLJ46906	PREDICTED: hypothetical gene supported by AK128874; BC071813 (FLJ46906)		XM_928441.1	441172	6.06393	6.23266	6.23458	6.66676	6.45286	6.55305	2.19337	0.380499	1.30179
ILMN_1780141	TMEM66	transmembrane protein 66 (TMEM66)	FLJ22274; FOAP-7; MGC8721; HSPC035; XTP3	NM_016127.4	51669	11.0382	11.2132	11.1604	11.7384	11.3136	11.5016	1.70612	0.380642	1.30192
ILMN_1742541	ZNF518A	zinc finger protein 518A (ZNF518A)	DKFZp781O2147; MGC125707; ZNF518; MGC125710	NM_014803.3	9849	6.13545	5.95187	6.24982	6.50779	6.30378	6.66818	1.68324	0.380869	1.30213
ILMN_1692938	PSAT1	phosphoserine aminotransferase 1 (PSAT1), transcript variant 2	MGC1460; PSA; EPIP; PSAT	NM_021154.3	29968	10.0087	10.0892	10.0721	10.422	10.4997	10.3911	2.92466	0.380938	1.30219
ILMN_2384122	GPR56	G protein-coupled receptor 56 (GPR56), transcript variant 3	BFPP; DKFZp781L1398; TM7LN4; TM7XN1	NM_201525.1	9289	7.43796	7.43713	7.56071	7.87836	7.88264	7.81826	2.80826	0.381153	1.30238
ILMN_1755352	TUB	tubby homolog (mouse) (TUB), transcript variant 2	rd5	NM_177972.1	7275	5.51728	5.56986	5.67807	6.01123	5.926	5.97269	2.66699	0.381572	1.30276
ILMN_2401057	CANX	calnexin (CANX), transcript variant 2	P90; IP90; FLJ26570; CNX	NM_001024649.1	821	8.05907	8.17592	8.2148	8.6703	8.43254	8.49265	2.18157	0.381899	1.30306
ILMN_1738554	LOC647346	PREDICTED: similar to Alcohol dehydrogenase class 3 chi chain (Alcohol dehydrogenase class III chi chain) (S-(hydroxymethyl)glutathione dehydrogenase) (Glutathione-dependent formaldehyde dehydrogenase) (FDH), transcript variant 1 (LOC647346)		XM_936495.2	647346	8.68545	8.83573	8.75087	9.07682	9.16967	9.17368	2.66689	0.382703	1.30378
ILMN_2342033	F11R	F11 receptor (F11R), transcript variant 5	JAM; JAM-A; PAM-1; JAM1; JAM-1; JAMA; JCAM; KAT; CD321	NM_144504.1	50848	8.52787	8.64638	8.81794	9.00562	8.93899	9.19697	1.87788	0.383132	1.30417
ILMN_1897741		AV737943 CB cDNA clone CBDAEG06 5, mRNA sequence			NA	8.86481	8.86357	8.99577	9.43567	9.20286	9.23506	2.19283	0.383149	1.30419
ILMN_1663351	SLC2A10	solute carrier family 2 (facilitated glucose transporter), member 10 (SLC2A10)	MGC126706; ATS; GLUT10	NM_030777.3	81031	7.6575	7.57289	7.49665	7.8586	8.0129	8.00619	2.42425	0.38355	1.30455
ILMN_1792951	ZHX2	zinc fingers and homeoboxes 2 (ZHX2)	KIAA0854	NM_014943.3	22882	7.15684	6.87036	6.97613	7.26491	7.50303	7.38629	1.93783	0.383632	1.30462
ILMN_1664176	FBLN5	fibulin 5 (FBLN5)	ARMD3; UP50; DANCE; FLJ90059; EVEC	NM_006329.2	10516	7.38716	7.41785	7.3733	7.69697	7.67243	7.96	2.1003	0.383695	1.30468
ILMN_1660963	CCIN	calicin (CCIN)		NM_005893.1	881	5.61176	5.53605	5.44294	5.92125	5.88753	5.9331	2.73292	0.383704	1.30469
ILMN_1713496	ST3GAL5	ST3 beta-galactoside alpha-2,3-sialyltransferase 5 (ST3GAL5), transcript variant 2	SIAT9; ST3GalV; SIATGM3S	NM_001042437.1	8869	6.92837	7.05745	6.86295	7.41193	7.28633	7.30195	2.41111	0.383816	1.30479
ILMN_1751028	SERPINH1	serpin peptidase inhibitor, clade H (heat shock protein 47), member 1, (collagen binding protein 1) (SERPINH1)	RA-A47; AsTP3; PIG14; gp46; CBP1; PPROM; HSP47; SERPINH2; CBP2	NM_001235.2	871	10.4607	10.1758	10.1871	10.5665	10.7101	10.6997	1.984	0.384247	1.30518
ILMN_1721138	GRPEL2	GrpE-like 2, mitochondrial (E. coli) (GRPEL2), nuclear gene encoding mitochondrial protein	FLJ23713; FLJ33918; Mt-GrpE2; DKFZp451C205	NM_152407.3	134266	7.63445	7.69697	7.7662	8.28817	7.80284	8.15937	1.60263	0.384256	1.30519
ILMN_1758086	SNAI1	snail homolog 1 (Drosophila) (SNAI1)	SNAH; SNA; SLUGH2; dJ710H13.1	NM_005985.2	6615	5.44294	5.2854	5.21335	5.80219	5.79442	5.49825	1.82558	0.384389	1.30531
ILMN_1741159	MAP3K8	mitogen-activated protein kinase kinase kinase 8 (MAP3K8)	TPL2; FLJ10486; EST; COT; c-COT; ESTF; Tpl-2	NM_005204.2	1326	6.76288	6.80219	6.8679	7.14568	7.21917	7.224	2.97606	0.385293	1.30612
ILMN_1755222	C9orf82	chromosome 9 open reading frame 82 (C9orf82)	RP11-337A23.1; FLJ13657	NM_024828.2	79886	6.56529	6.65821	6.6837	7.12205	6.89482	7.04658	2.32743	0.385416	1.30624
ILMN_1915076		cDNA FLJ41921 fis, clone PERIC2002766			NA	7.3906	7.40429	7.44708	7.80607	7.73335	7.85985	2.96481	0.385765	1.30655
ILMN_3249172	NCRNA00092	non-protein coding RNA 92 (NCRNA00092), non-coding RNA.		NR_024129.1	100188953	5.91886	5.86542	5.91409	6.26866	6.24222	6.34518	3.08751	0.385897	1.30667
ILMN_1700432	ITPKB	inositol 1,4,5-trisphosphate 3-kinase B (ITPKB)	IP3K-B; IP3KB; IP3K; PIG37	NM_002221.2	3707	6.59395	6.33807	6.29094	6.92955	6.74685	6.7046	1.86984	0.386013	1.30678
ILMN_1810852	LAMC1	laminin, gamma 1 (formerly LAMB2) (LAMC1)	LAMB2; MGC87297	NM_002293.2	3915	12.1417	12.2067	12.1595	12.6713	12.5305	12.4653	2.51693	0.386361	1.30709
ILMN_1738552	SLC1A3	solute carrier family 1 (glial high affinity glutamate transporter), member 3 (SLC1A3)	GLAST; EA6; FLJ25094; EAAT1; GLAST1	NM_004172.3	6507	5.57592	5.32912	5.44294	5.80219	5.92125	5.78398	2.23392	0.386478	1.3072
ILMN_1723358	SCARA3	scavenger receptor class A, member 3 (SCARA3), transcript variant 1	APC7; MSLR1; MSRL1; CSR; CSR1	NM_016240.2	51435	7.42794	7.40259	7.46025	7.79701	7.85985	7.79377	3.30644	0.386615	1.30732
ILMN_2105253	PTGR2	prostaglandin reductase 2 (PTGR2)	FLJ39091; PGR-2; PGR2; DKFZp686P10120	NM_152444.1	145482	6.91169	6.89239	6.98071	7.60807	7.18488	7.15279	1.62024	0.386981	1.30765
ILMN_1734897	SLC4A4	solute carrier family 4, sodium bicarbonate cotransporter, member 4 (SLC4A4), transcript variant 2	KNBC; pNBC; NBC2; NBC1; hhNMC; HNBC1; SLC4A5; DKFZp781H1314	NM_003759.2	8671	5.70598	5.72792	5.59694	6.03122	5.92362	6.24031	2.03071	0.388108	1.30868
ILMN_1705685	MEIS1	Meis homeobox 1 (MEIS1)	MGC43380	NM_002398.2	4211	7.64241	7.67878	7.51649	8.10696	7.96405	7.93192	2.38896	0.388417	1.30896
ILMN_2336982	NPTN	neuroplastin (NPTN), transcript variant alpha	SDFR1; GP55; DKFZp686L2477; np65; np55; GP65; SDR1; MGC102805	NM_017455.2	27020	11.4422	11.3323	11.3646	11.9912	11.6544	11.6603	1.89093	0.388931	1.30942
ILMN_1800412	BMP1	bone morphogenetic protein 1 (BMP1), transcript variant BMP1-3	PCOLC; FLJ44432; TLD; PCP	NM_006129.2	649	7.44128	7.34074	7.35667	7.84423	7.75154	7.71012	2.77588	0.389067	1.30955
ILMN_1682799	STAMBPL1	STAM binding protein-like 1 (STAMBPL1)	bA399O19.2; AMSH-LP; ALMalpha; KIAA1373; FLJ31524; AMSH-FP	NM_020799.2	57559	7.59544	7.71836	7.84549	8.15381	7.91109	8.26162	1.80108	0.389076	1.30955
ILMN_1797875	ALOX5AP	arachidonate 5-lipoxygenase-activating protein (ALOX5AP)	FLAP	NM_001629.2	241	6.24793	6.24222	6.04876	6.60437	6.53605	6.56682	2.46354	0.389443	1.30989
ILMN_1714805	ZC3H14	zinc finger CCCH-type containing 14 (ZC3H14), transcript variant 1	MGC26892; UKp68; FLJ11806; NY-REN-37	NM_024824.3	79882	6.33807	6.36107	6.50621	7.0542	6.59991	6.71973	1.6541	0.3895	1.30994
ILMN_2178226	KRT86	keratin 86 (KRT86)	hHb6; KRTHB1; Hb1; FLJ25176; KRTHB6; MNX; HB6	NM_002284.3	3892	5.65249	5.98868	5.93074	6.25739	6.15785	6.32553	1.90685	0.389621	1.31005
ILMN_2041222	FLJ40504	hypothetical protein FLJ40504 (FLJ40504)	MGC138233; MGC138231	NM_173624.1	284085	9.70753	9.66445	9.63281	10.1258	10.0477	10.0007	2.95	0.389794	1.31021
ILMN_2355665	MTP18	mitochondrial protein 18 kDa (MTP18), nuclear gene encoding mitochondrial protein, transcript variant 1	HSPC242	NM_016498.3	51537	7.31288	7.32912	7.33539	7.57818	7.79181	7.77742	2.45334	0.390007	1.3104
ILMN_1660544	ARRDC4	arrestin domain containing 4 (ARRDC4)	FLJ36045	NM_183376.1	91947	6.1127	5.86047	5.73335	6.24982	6.1416	6.48543	1.62228	0.390109	1.31049
ILMN_2269564	ARID4B	AT rich interactive domain 4B (RBP1-like) (ARID4B), transcript variant 1	BCAA; RBP1L1; MGC163290; BRCAA1; SAP180; RBBP1L1; DKFZp313M2420	NM_016374.5	51742	7.2211	7.25833	7.33092	7.79442	7.66534	7.52121	2.23038	0.390203	1.31058
ILMN_1656910	TRIM6	tripartite motif-containing 6 (TRIM6), transcript variant 2	RNF89	NM_058166.3	117854	6.62352	6.85922	6.82782	7.29646	7.14057	7.04439	2.01294	0.390289	1.31066
ILMN_2408683	PPAP2B	phosphatidic acid phosphatase type 2B (PPAP2B), transcript variant 2	MGC15306; LPP3; Dri42; VCIP; PAP2-beta; PAP2-b; PAP-2b	NM_177414.1	8613	5.80735	5.82782	5.93074	6.23074	6.21335	6.29278	2.89428	0.39032	1.31068
ILMN_1655504	IFT81	intraflagellar transport 81 homolog (Chlamydomonas) (IFT81), transcript variant 1	CDV1R; MGC102777; CDV-1R; CDV-1; CDV1; MGC4027	NM_014055.2	28981	5.47249	5.35755	5.53294	5.71699	5.86047	5.95652	2.21465	0.390333	1.3107
ILMN_1761858	MID1	midline 1 (Opitz/BBB syndrome) (MID1), transcript variant 3	RNF59; OGS1; TRIM18; FXY; OS; XPRF; GBBB1; OSX; BBBG1; ZNFXY	NM_033290.2	4281	7.61029	7.56758	7.71493	8.0268	8.03232	8.00506	2.90817	0.390463	1.31081
ILMN_1707199	WDR20	WD repeat domain 20 (WDR20), transcript variant 1	FLJ33659; DMR; MGC33177; MGC33183	NM_181291.1	91833	7.95303	8.11582	7.95361	8.32148	8.41363	8.45943	2.48244	0.390689	1.31102
ILMN_1810729	UBL3	ubiquitin-like 3 (UBL3)	DKFZP434K151; PNSC1; HCG-1; FLJ32018	NM_007106.2	5412	7.24508	7.38284	7.36282	7.66818	7.80929	7.6858	2.57992	0.390841	1.31116
ILMN_1652065	KCNMB1	potassium large conductance calcium-activated channel, subfamily M, beta member 1 (KCNMB1)	K(VCA)beta; SLO-BETA; hslo-beta	NM_004137.2	3779	5.27798	5.37851	5.35403	5.82273	5.64962	5.71149	2.63002	0.391105	1.3114
ILMN_1716815	CEACAM1	carcinoembryonic antigen-related cell adhesion molecule 1 (biliary glycoprotein) (CEACAM1), transcript variant 2	BGP1; BGPI; BGP	NM_001024912.1	634	5.10434	5.18982	5.1334	5.50462	5.42962	5.66676	2.38428	0.391144	1.31143
ILMN_1669905	DCP2	DCP2 decapping enzyme homolog (S. cerevisiae) (DCP2)	NUDT20; FLJ33245	NM_152624.4	167227	7.44956	7.57289	7.6014	7.96867	7.92006	7.90869	2.7982	0.391188	1.31147
ILMN_1658071	ATP1B1	ATPase, Na+/K+ transporting, beta 1 polypeptide (ATP1B1), transcript variant 1	MGC1798; ATP1B	NM_001677.3	481	8.84235	8.87406	8.82432	9.35293	9.01876	9.34274	1.95227	0.391231	1.31151
ILMN_1783247	C10orf11	chromosome 10 open reading frame 11 (C10orf11)	CDA017	NM_032024.3	83938	5.2854	5.29646	5.42291	5.72247	5.64386	5.8125	2.5179	0.391352	1.31162
ILMN_1676448	WDFY1	WD repeat and FYVE domain containing 1 (WDFY1)	FENS-1; ZFYVE17; WDF1	NM_020830.3	57590	10.2674	10.2647	10.1443	10.6857	10.5063	10.6585	2.46585	0.391391	1.31166
ILMN_2297626	PEG10	paternally expressed 10 (PEG10), transcript variant 1 XM_940378	Mart2; MEF3L; Mar2; HB-1; KIAA1051; Edr; RGAG3	NM_001040152.1	23089	6.16591	6.23266	6.27798	6.76951	6.3837	6.69905	1.84244	0.391902	1.31212
ILMN_1795442	LAMA4	laminin, alpha 4 (LAMA4)	LAMA3; DKFZp686D23145; LAMA4*-1	NM_002290.2	3910	9.65678	9.59675	9.50144	9.81266	10.0735	10.0448	2.13202	0.391988	1.3122
ILMN_2400583	USP9X	ubiquitin specific peptidase 9, X-linked (USP9X), transcript variant 3	DFFRX; FAF	NM_001039590.1	8239	5.97269	5.83289	5.8802	6.39917	6.20359	6.25927	2.43665	0.392086	1.31229
ILMN_1727134	KLHDC5	kelch domain containing 5 (KLHDC5)	MGC131714; KIAA1340	NM_020782.1	57542	8.81794	8.5691	8.78169	9.10303	9.12102	9.12102	2.3402	0.39211	1.31231
ILMN_1723087	MDK	midkine (neurite growth-promoting factor 2) (MDK), transcript variant 1	FLJ27379; MK; NEGF2	NM_001012334.1	4192	5.1416	5.20945	5.42962	5.67525	5.4822	5.79961	1.81098	0.392131	1.31233
ILMN_1786050	RBBP9	retinoblastoma binding protein 9 (RBBP9)	BOG; RBBP10; MGC9236	NM_006606.2	10741	6.89966	6.94017	7.03232	7.43962	7.20261	7.40769	2.26019	0.392594	1.31275
ILMN_1713934	LITAF	lipopolysaccharide-induced TNF factor (LITAF)	MGC125274; MGC116701; CMT1C; MGC116700; SIMPLE; TP53I7; FLJ38636; PIG7; MGC125276; MGC116698; MGC125275	NM_004862.2	9516	10.3069	10.2834	10.0547	10.6676	10.5947	10.561	2.23079	0.392769	1.31291
ILMN_1689329	SCD	stearoyl-CoA desaturase (delta-9-desaturase) (SCD)	SCD1; PRO0998; MSTP008; FADS5	NM_005063.4	6319	11.0557	11.0812	11.075	11.5216	11.402	11.4675	3.1417	0.393068	1.31318
ILMN_1810836	PDE5A	phosphodiesterase 5A, cGMP-specific (PDE5A), transcript variant 1	CGB-PDE; PDE5; PDE5A1; CN5A	NM_001083.3	8654	8.6268	8.78496	8.64313	9.20775	8.91319	9.11322	2.06871	0.393085	1.3132
ILMN_2388547	EPSTI1	epithelial stromal interaction 1 (breast) (EPSTI1), transcript variant 2	BRESI1; MGC29634	NM_033255.2	94240	7.88081	7.82655	7.95536	8.32598	8.1918	8.32508	2.66056	0.393381	1.31347
ILMN_2372403	ALDH5A1	aldehyde dehydrogenase 5 family, member A1 (ALDH5A1), nuclear gene encoding mitochondrial protein, transcript variant 2	SSDH; SSADH	NM_001080.3	7915	5.36807	5.58796	5.38888	5.90448	5.83542	5.7866	2.34869	0.393862	1.31391
ILMN_1651343	ITGA11	integrin, alpha 11 (ITGA11)	HsT18964	NM_001004439.1	22801	7.25456	6.88631	6.92719	7.47086	7.29554	7.48382	1.78216	0.394056	1.31408
ILMN_1773992	CCRL1	chemokine (C-C motif) receptor-like 1 (CCRL1), transcript variant 2	CCBP2; CCR11; PPR1; CCX-CKR; CC-CKR-11; VSHK1; CCR10; CKR-11	NM_016557.2	51554	5.49185	5.52669	5.84298	5.9542	5.97728	6.1127	1.86084	0.394217	1.31423
ILMN_2045994	SEPW1	selenoprotein W, 1 (SEPW1)	selW	NM_003009.2	6415	9.50978	9.2854	9.35116	9.6793	9.7949	9.85487	2.26701	0.394246	1.31426
ILMN_2361862	VLDLR	very low density lipoprotein receptor (VLDLR), transcript variant 2	FLJ35024; VLDLRCH	NM_001018056.1	7436	8.42122	8.71493	8.60251	8.90839	8.91737	9.09724	2.02366	0.394779	1.31474
ILMN_2216157	GNA12	guanine nucleotide binding protein (G protein) alpha 12 (GNA12)	RMP; NNX3; gep; MGC99644; MGC104623	NM_007353.2	2768	8.06501	8.16692	8.18884	8.61618	8.43879	8.55036	2.56371	0.394857	1.31481
ILMN_1703441	ZNF593	zinc finger protein 593 (ZNF593)	ZT86	NM_015871.3	51042	8.78398	8.78725	8.74651	8.98157	9.26585	9.25574	2.15051	0.395136	1.31507
ILMN_2319326	ADARB1	adenosine deaminase, RNA-specific, B1 (RED1 homolog rat) (ADARB1), transcript variant 2	ADAR2a; ADAR2; DRABA2; DRADA2; ADAR2a-L1; ADAR2a-L2; ADAR2g; ADAR2c; RED1; ADAR2a-L3; ADAR2b; ADAR2d	NM_015833.2	104	5.63807	5.63517	5.54226	5.95652	5.96347	6.08108	2.80426	0.395191	1.31512
ILMN_1806787	CSDC2	cold shock domain containing C2, RNA binding (CSDC2)	dJ347H13.2; PIPPIN	NM_014460.2	27254	5.33271	5.06178	5.26303	5.66391	5.59395	5.58796	2.26974	0.396104	1.31595
ILMN_2402558	ZHX1	zinc fingers and homeoboxes 1 (ZHX1), transcript variant 2		NM_007222.3	11244	6.37851	6.54071	6.47573	6.94486	6.77347	6.86542	2.5069	0.396266	1.3161
ILMN_3237404	LOC100132585	PREDICTED: hypothetical protein LOC100132585 (LOC100132585)		XM_001722111.1	100132585	8.65857	8.62425	8.68159	9.27822	8.86171	9.01346	1.86468	0.396327	1.31615
ILMN_1737635	RAD1	RAD1 homolog (S. pombe) (RAD1), transcript variant 3	REC1; HRAD1	NM_133377.2	5810	5.58796	5.88753	5.72247	6.27984	6.17991	5.92837	1.75938	0.396722	1.31651
ILMN_1675448	ZFP36L1	zinc finger protein 36, C3H type-like 1 (ZFP36L1)	TIS11B; ERF1; Berg36; cMG1; BRF1; RNF162B; ERF-1	NM_004926.2	677	9.56129	9.63735	9.57346	10.0863	9.81794	10.0583	2.22826	0.396793	1.31658
ILMN_3300358	ZNF84	zinc finger protein 84 (ZNF84), transcript variant 1		NM_003428.4	7637	6.25361	6.35755	6.28725	6.7761	6.60437	6.70874	2.67649	0.396932	1.31671
ILMN_2297069	FAM115A	family with sequence similarity 115, member A (FAM115A)	KIAA0738	NM_014719.1	9747	12.2209	12.2191	12.1537	12.8385	12.4653	12.481	1.85903	0.396997	1.31676
ILMN_2228938	ECM2	extracellular matrix protein 2, female organ and adipocyte specific (ECM2)	MGC126355; MGC126356	NM_001393.2	1842	5.59694	5.29646	5.55766	5.93546	5.80478	5.90207	2.07002	0.397087	1.31685
ILMN_2154950	ZNF423	zinc finger protein 423 (ZNF423)	OAZ; ZFP423; Roaz; MGC138522; MGC138520; Ebfaz; Zfp104; KIAA0760	NM_015069.2	23090	5.24793	5.39917	5.30378	5.74416	5.53294	5.86542	2.02232	0.397215	1.31696
ILMN_1750145	YWHAG	tyrosine 3-monooxygenase/tryptophan 5-monooxygenase activation protein, gamma polypeptide (YWHAG)	14-3-3GAMMA	NM_012479.2	7532	8.75789	8.82845	8.926	9.45718	9.01569	9.23146	1.75682	0.397329	1.31707
ILMN_2382942	CA12	carbonic anhydrase XII (CA12), transcript variant 1	CAXII; FLJ20151; HsT18816	NM_001218.3	771	7.77215	7.82146	7.84298	8.22882	8.18388	8.21626	3.46881	0.39746	1.31719
ILMN_1685824	B4GALT5	UDP-Gal:betaGlcNAc beta 1,4- galactosyltransferase, polypeptide 5 (B4GALT5)	beta4Gal-T5; BETA4-GALT-IV; B4Gal-T5; gt-V; beta4GalT-V	NM_004776.2	9334	10.0618	10.0658	10.1202	10.3846	10.5784	10.4778	2.67295	0.397622	1.31733
ILMN_1713751	ADAM19	ADAM metallopeptidase domain 19 (meltrin beta) (ADAM19)	MADDAM; FKSG34; MLTNB	NM_033274.2	8728	10.2778	10.1585	10.1534	10.564	10.5932	10.6263	2.96643	0.39795	1.31763
ILMN_1911042		cDNA FLJ13267 fis, clone OVARC1000964			NA	9.13031	9.4096	9.27123	9.77577	9.56472	9.66516	2.08708	0.398169	1.31783
ILMN_2129388	FAM190B	family with sequence similarity 190, member B (FAM190B)	FLJ14262; Gcap14; FLJ25809; bA486O22.1	NM_018999.2	54462	7.69279	7.79051	7.5744	7.87283	8.13648	8.2446	1.84115	0.398734	1.31835
ILMN_2405023	PPP1CB	protein phosphatase 1, catalytic subunit, beta isoform (PPP1CB), transcript variant 3	PP-1B; PPP1CD; MGC3672	NM_206876.1	5500	6.63662	6.74953	6.7046	7.27984	6.97154	7.03562	2.10754	0.398752	1.31837
ILMN_1716407	SORBS2	sorbin and SH3 domain containing 2 (SORBS2), transcript variant 1	PRO0618; KIAA0777; ARGBP2	NM_003603.4	8470	6.11478	6.58796	6.22304	6.58646	6.64962	6.88874	1.53786	0.399679	1.31921
ILMN_3236160	C4orf49	chromosome 4 open reading frame 49 (C4orf49)	MGC125827; MGC125828	NM_032623.3	84709	8.80155	8.63481	8.62571	8.89269	9.17518	9.19426	1.97324	0.400023	1.31953
ILMN_1681757	FAM80B	family with sequence similarity 80, member B (FAM80B)	KIAA1238	NM_020734.1	57494	5.1819	5.24413	5.04876	5.66107	5.39917	5.61471	2.11826	0.400055	1.31956
ILMN_1715662	CCDC80	coiled-coil domain containing 80 (CCDC80), transcript variant 1	URB; DRO1; okuribin; MGC131805; MGC134851; SSG1	NM_199511.1	151887	7.11374	7.04767	7.07682	7.41278	7.43045	7.59544	2.65114	0.40015	1.31965
ILMN_1789502	GPC4	glypican 4 (GPC4)	K-glypican	NM_001448.2	2239	6.2724	6.14975	6.16189	6.55612	6.39575	6.83289	1.79312	0.400243	1.31973
ILMN_1779875	THY1	Thy-1 cell surface antigen (THY1)	CD90; FLJ33325	NM_006288.2	7070	9.48884	9.37352	9.44066	10.0415	9.70839	9.75472	2.01147	0.400538	1.32
ILMN_1685339	TPM1	tropomyosin 1 (alpha) (TPM1), transcript variant 6	TPM1-alpha; HTM-alpha; TPM1-kappa; TMSA; C15orf13	NM_001018008.1	7168	6.60288	6.67807	6.42459	7.07895	6.70321	7.12516	1.64843	0.400592	1.32005
ILMN_1807095	MRPS36	mitochondrial ribosomal protein S36 (MRPS36), nuclear gene encoding mitochondrial protein	MRP-S36; MGC22896; DC47	NM_033281.5	92259	6.05528	6.27798	6.27426	6.69905	6.50938	6.6014	2.20854	0.400767	1.32021
ILMN_1682727	JAZF1	JAZF zinc finger 1 (JAZF1)	ZNF802; TIP27; DKFZp761K2222	NM_175061.3	221895	7.47086	7.78594	7.78005	8.13083	8.00731	8.10434	2.00603	0.401873	1.32122
ILMN_2404688	NUPR1	nuclear protein, transcriptional regulator, 1 (NUPR1), transcript variant 1	P8; COM1	NM_001042483.1	26471	8.22689	8.03452	8.15937	8.41024	8.59171	8.62498	2.27087	0.402047	1.32138
ILMN_1794187	FBXL3	F-box and leucine-rich repeat protein 3 (FBXL3)	FBL3A; FBXL3A; FBL3	NM_012158.1	26224	7.12928	7.15381	7.14057	7.77017	7.3156	7.54458	1.81904	0.402229	1.32155
ILMN_2106902	CHES1	checkpoint suppressor 1 (CHES1)	C14orf116; FOXN3; PRO1635	NM_005197.2	1112	8.57099	8.58871	8.43212	9.05664	8.84266	8.90026	2.3603	0.402577	1.32187
ILMN_1695299	PDLIM3	PDZ and LIM domain 3 (PDLIM3)	DKFZp686L0362; ALP	NM_014476.1	27295	9.34629	9.24627	9.27822	9.50184	9.80332	9.77396	2.11863	0.402783	1.32206
ILMN_1714158	PON2	paraoxonase 2 (PON2), transcript variant 1		NM_000305.2	5445	10.2218	10.3601	10.4094	10.7934	10.6063	10.8013	2.30913	0.403253	1.32249
ILMN_1910308		ye74b04.s1 Soares fetal liver spleen 1NFLS cDNA clone IMAGE:123439 3, mRNA sequence			NA	5.1375	5.2211	5.06178	5.46923	5.83542	5.32553	1.62399	0.403267	1.3225
ILMN_1775708	SLC2A3	solute carrier family 2 (facilitated glucose transporter), member 3 (SLC2A3)	GLUT3; FLJ90380	NM_006931.1	6515	9.6907	9.53391	9.61121	9.9555	10.02	10.0711	2.7647	0.403584	1.32279
ILMN_1814808	BFAR	bifunctional apoptosis regulator (BFAR)	BAR; RNF47	NM_016561.1	51283	8.37938	8.53021	8.4818	9.16516	8.67384	8.76321	1.63265	0.403607	1.32281
ILMN_1723962	LXN	latexin (LXN)	TCI; ECI	NM_020169.2	56925	10.338	10.2587	10.3846	10.7732	10.6177	10.8024	2.56017	0.404007	1.32318
ILMN_1767542	THAP10	THAP domain containing 10 (THAP10)		NM_020147.2	56906	7.12309	7.13237	7.17792	7.60363	7.46025	7.58346	2.94049	0.404654	1.32377
ILMN_1742705	SLC39A11	solute carrier family 39 (metal ion transporter), member 11 (SLC39A11)	C17orf26	NM_139177.2	201266	6.31651	6.39232	6.39746	6.94017	6.62352	6.75756	2.18753	0.404984	1.32407
ILMN_3279414	LOC440595	PREDICTED: misc_RNA (LOC440595), miscRNA.		XR_038356.1	440595	10.4365	10.8908	10.6865	11.0276	11.0172	11.1848	1.74814	0.405246	1.32431
ILMN_2190779	PHAX	phosphorylated adaptor for RNA export (PHAX)	FLJ13193; PHAX	NM_032177.2	51808	6.02015	6.1416	6.22882	6.71562	6.34873	6.54226	1.91444	0.405348	1.32441
ILMN_1750974	S100A9	S100 calcium binding protein A9 (calgranulin B) (S100A9)	CFAG; MAC387; 60B8AG; MIF; MRP14; CGLB; CAGB; LIAG; NIF; P14; L1AG	NM_002965.2	6280	6.63662	6.82018	6.75889	7.29278	7.01235	7.12722	2.16455	0.405551	1.3246
ILMN_2058512	PSMA2	proteasome (prosome, macropain) subunit, alpha type, 2 (PSMA2)	HC3; MU; PSC2; PMSA2	NM_002787.3	5683	7.80993	7.75822	7.82972	8.40429	7.98698	8.224	1.91044	0.405799	1.32482
ILMN_3254413	LOC100129426	PREDICTED: similar to HIG1 domain family, member 1A (LOC100129426)		XM_001724107.1	100129426	6.05745	6.16993	6.09381	6.7866	6.33271	6.42122	1.74801	0.406446	1.32542
ILMN_1778523	KLF9	Kruppel-like factor 9 (KLF9)	BTEB; BTEB1	NM_001206.2	687	9.64404	9.66977	9.52101	9.80041	10.1824	10.0721	1.91715	0.406708	1.32566
ILMN_1864685		cDNA clone IMAGE:5922621, partial cds			NA	7.53993	7.51254	7.42543	7.853	7.81186	8.03397	2.44917	0.406975	1.3259
ILMN_3252936	KRT18P17	PREDICTED: misc_RNA (KRT18P17), miscRNA.		XR_037953.1	344866	6.94017	6.89845	6.74551	7.27146	7.22207	7.31198	2.63789	0.407128	1.32604
ILMN_3282292	LOC646316	PREDICTED: misc_RNA (LOC646316), miscRNA.		XR_039453.1	646316	6.62205	6.73877	6.69627	7.23745	7	7.04111	2.3877	0.407156	1.32607
ILMN_1815154	MYH10	myosin, heavy chain 10, non-muscle (MYH10)	NMMHCB; MGC134914; MGC134913	NM_005964.1	4628	11.5037	11.5369	11.4205	11.9561	11.8394	11.8878	2.94903	0.407395	1.32629
ILMN_1706498	DSE	dermatan sulfate epimerase (DSE), transcript variant 1	DSEPI; SART2	NM_013352.2	29940	9.89573	9.92807	9.94281	10.5119	10.1076	10.3709	1.95192	0.407919	1.32677
ILMN_1664348	PNPLA4	patatin-like phospholipase domain containing 4 (PNPLA4)	GS2; DXS1283E	NM_004650.1	8228	5.70598	5.73877	5.94251	6.40259	6.06393	6.14568	1.89263	0.408312	1.32713
ILMN_1730945	C19orf4	chromosome 19 open reading frame 4 (C19orf4)	BSMAP	NM_012109.1	25789	5.66676	5.58796	5.32193	6.0268	6.0045	5.77083	1.83748	0.408494	1.3273
ILMN_1718866	C5orf46	chromosome 5 open reading frame 46 (C5orf46)		NM_206966.2	389336	10.5843	10.378	10.4834	10.7278	10.7337	11.2111	1.56949	0.408951	1.32772
ILMN_1805646	SS18	synovial sarcoma translocation, chromosome 18 (SS18), transcript variant 2	SYT-SSX2; SYT; SYT-SSX1; MGC116875; SSXT	NM_005637.2	6760	8.75856	8.84612	8.98613	9.5812	9.03094	9.20555	1.54294	0.408964	1.32773
ILMN_1732717	FAM71E1	family with sequence similarity 71, member E1 (FAM71E1)	FLJ27522; FLJ43757	NM_138411.1	112703	5.47573	5.30012	5.39917	5.95187	5.70321	5.74685	2.25097	0.408967	1.32773
ILMN_1771333	CD47	CD47 molecule (CD47), transcript variant 2	OA3; MER6; IAP	NM_198793.2	961	7.93899	8.01569	8.13391	8.47816	8.31651	8.52278	2.35132	0.409617	1.32833
ILMN_1734653	FNDC1	fibronectin type III domain containing 1 (FNDC1)	bA243O10.1; AGS8; RP11-243O10.2; KIAA1866; MEL4B3; dJ322A24.1; FNDC2	NM_032532.2	84624	5.64097	5.77873	5.62352	5.97728	5.99322	6.30195	1.98692	0.409746	1.32845
ILMN_2407851	IL17RD	interleukin 17 receptor D (IL17RD), transcript variant 1	MGC133309; FLJ35755; DKFZp434N1928; IL-17RD; SEF; IL17RLM	NM_001080973.1	54756	8.43505	8.63372	8.61176	9.28679	8.78202	8.84204	1.57201	0.410104	1.32878
ILMN_1711748	PLTP	phospholipid transfer protein (PLTP), transcript variant 1	HDLCQ9	NM_006227.2	5360	6	6.09803	6.01792	6.32373	6.62205	6.40088	2.22892	0.410236	1.3289
ILMN_1681882	CETP	cholesteryl ester transfer protein, plasma (CETP)	HDLCQ10	NM_000078.1	1071	5.56377	5.50144	5.49185	5.99322	5.87529	5.92125	3.14216	0.410898	1.32951
ILMN_2412192	CFH	complement factor H (CFH), transcript variant 2	HUS; MGC88246; HF1; FH; ARMD4; ARMS1; HF; CFHL3; FHL1; HF2	NM_001014975.1	3075	8.65428	9.09144	8.66924	9.29806	9.14109	9.20945	1.71318	0.411216	1.32981
ILMN_1720889	SC4MOL	sterol-C4-methyl oxidase-like (SC4MOL), transcript variant 2	MGC104344; ERG25; DESP4	NM_001017369.1	6307	9.54921	9.64404	9.82671	10.0681	10.0285	10.1585	2.2901	0.411699	1.33025
ILMN_1710543	SLC39A3	solute carrier family 39 (zinc transporter), member 3 (SLC39A3), transcript variant 1	ZIP3	NM_144564.4	29985	6.43796	6.55612	6.63807	6.88509	7.0045	6.97842	2.60443	0.411952	1.33048
ILMN_2089073	ATP9A	ATPase, class II, type 9A (ATP9A)	KIAA0611; ATPIIA	NM_006045.1	10079	8.77873	8.83131	8.7252	9.20726	9.07227	9.29186	2.56551	0.41205	1.33057
ILMN_1803423	ARHGEF6	Rac/Cdc42 guanine nucleotide exchange factor (GEF) 6 (ARHGEF6)	COOL2; PIXA; MRX46; KIAA0006; alpha-PIX; Cool-2; alphaPIX	NM_004840.2	9459	7.47168	7.44791	7.32912	7.80284	7.77939	7.90268	2.78829	0.412066	1.33059
ILMN_1669114	WNK4	WNK lysine deficient protein kinase 4 (WNK4)	PRKWNK4; PHA2B	NM_032387.3	65266	8.64205	8.74382	8.69523	9.20286	9.0634	9.05202	2.81664	0.412391	1.33089
ILMN_2120247	SLC2A10	solute carrier family 2 (facilitated glucose transporter), member 10 (SLC2A10)	MGC126706; ATS; GLUT10	NM_030777.3	81031	9.31402	9.14466	9.26468	9.69749	9.54477	9.71853	2.51437	0.41248	1.33097
ILMN_1709300	IL5	interleukin 5 (colony-stimulating factor, eosinophil) (IL5)	EDF; TRF; IL-5	NM_000879.2	3567	5.04439	5.16189	5.25172	5.57289	5.68089	5.44294	2.28122	0.412906	1.33137
ILMN_2059452	SLC12A2	solute carrier family 12 (sodium/potassium/chloride transporters), member 2 (SLC12A2)	NKCC1; BSC2; MGC104233; BSC	NM_001046.2	6558	8.96578	9.09987	9.20163	9.62717	9.31877	9.56071	2.00872	0.41312	1.33156
ILMN_1740466	FAM46A	family with sequence similarity 46, member A (FAM46A)	XTP11; C6orf37; FLJ20037; FLJ31495	NM_017633.2	55603	7.89421	7.96867	7.83542	8.32012	8.3336	8.28586	3.16342	0.413765	1.33216
ILMN_2371053	EFNA1	ephrin-A1 (EFNA1), transcript variant 1	B61; EPLG1; TNFAIP4; EFL1; ECKLG; LERK1	NM_004428.2	1942	5.19377	5.31107	5.19377	5.61765	5.53916	5.78398	2.41024	0.41406	1.33243
ILMN_3310491	MIR1978	microRNA 1978 (MIR1978), microRNA.		NR_031742.1	100302173	8.72554	8.55497	8.46475	8.90779	8.94866	9.13237	2.15063	0.414521	1.33286
ILMN_1669898	EGFL7	EGF-like-domain, multiple 7 (EGFL7), transcript variant 2	RP11-251M1.2; MGC111117; ZNEU1	NM_201446.1	51162	6.6893	6.824	6.43296	6.98071	7.29646	6.91289	1.62975	0.414598	1.33293
ILMN_1733515	LOXL3	lysyl oxidase-like 3 (LOXL3)	LOXL	NM_032603.2	84695	8.17692	7.77939	8.00955	8.30287	8.49466	8.41236	1.90539	0.414673	1.333
ILMN_1813704	KIAA1199	KIAA1199 (KIAA1199)	TMEM2L; CCSP1	NM_018689.1	57214	11.5887	11.7616	11.7938	12.1751	12.0636	12.1508	2.56564	0.415145	1.33343
ILMN_1687216	PCBP3	poly(rC) binding protein 3 (PCBP3)	ALPHA-CP3	NM_020528.1	54039	5.4363	5.40259	5.17393	5.9542	5.68089	5.62644	1.88875	0.416238	1.33444
ILMN_1658709	LAMB1	laminin, beta 1 (LAMB1)	MGC142015; CLM	NM_002291.1	3912	10.179	10.0454	10.1601	10.6018	10.4834	10.5504	2.90129	0.417011	1.33516
ILMN_1710284	HES1	hairy and enhancer of split 1, (Drosophila) (HES1)	HHL; FLJ20408; HRY; HES-1	NM_005524.2	3280	5.55459	5.33985	5.36807	5.91886	5.74953	5.84549	2.41074	0.417126	1.33527
ILMN_1782813	DHFR	dihydrofolate reductase (DHFR)		NM_000791.3	1719	5.86542	5.71149	5.43962	5.94486	6.10434	6.21917	1.75748	0.417274	1.3354
ILMN_1694711	MAD2L1BP	MAD2L1 binding protein (MAD2L1BP), transcript variant 2	RP1-261G23.6; CMT2; MGC11282; KIAA0110	NM_014628.2	9587	7.6858	7.66107	7.82464	8.19229	8.09117	8.14006	2.81242	0.41734	1.33546
ILMN_1800317	WNT5A	wingless-type MMTV integration site family, member 5A (WNT5A)	hWNT5A	NM_003392.3	7474	5.17393	5.24413	5.29278	5.78136	5.65821	5.52356	2.43037	0.417433	1.33555
ILMN_1843932		mRNA; cDNA DKFZp667L2214 (from clone DKFZp667L2214)			NA	6.08746	6.21335	5.85798	6.56834	6.40088	6.44294	2.03545	0.417789	1.33588
ILMN_2140059	LAMA4	laminin, alpha 4 (LAMA4)	LAMA3; DKFZp686D23145; LAMA4*-1	NM_002290.2	3910	10.4769	10.744	10.7071	11.0714	11.1083	11.0023	2.33724	0.418002	1.33608
ILMN_2128741	RDH11	retinol dehydrogenase 11 (all-trans/9-cis/11-cis) (RDH11)	MDT1; RALR1; HCBP12; SCALD; ARSDR1; CGI-82; FLJ32633; PSDR1	NM_016026.2	51109	9.03919	8.93015	9.06609	9.56701	9.33985	9.38262	2.44665	0.418017	1.33609
ILMN_1700541	FBLN1	fibulin 1 (FBLN1), transcript variant C	FBLN	NM_001996.2	2192	7.75355	7.55536	7.54071	7.99774	7.98982	8.11686	2.4647	0.418271	1.33632
ILMN_1794399	SNRK	SNF related kinase (SNRK)	HSNFRK; DKFZp779A1866; FLJ20224; KIAA0096	NM_017719.3	54861	7.56071	7.49506	7.49346	7.71081	8.05094	8.04275	2.05195	0.418424	1.33647
ILMN_2172755	DEPDC6	DEP domain containing 6 (DEPDC6)	DKFZp564B1778; FLJ13854; FLJ12428; DEP.6	NM_022783.1	64798	6.46597	6.50303	6.35226	6.84298	6.8125	6.92125	2.87732	0.418485	1.33652
ILMN_1789627	2017-09-06	septin 5 (SEPT5)	PNUTL1; CDCREL1; H5; CDCREL; CDCREL-1	NM_002688.4	5413	6.48059	6.58346	6.55459	7.00787	6.97269	6.89482	3.10238	0.418914	1.33692
ILMN_2049766	NFE2L3	nuclear factor (erythroid-derived 2)-like 3 (NFE2L3)	NRF3	NM_004289.5	9603	9.33204	9.49566	9.57024	10.0147	9.79799	9.84345	2.25298	0.419409	1.33738
ILMN_1801236	SPG20	spastic paraplegia 20 (Troyer syndrome) (SPG20)	TAHCCP1; KIAA0610; SPARTIN	NM_015087.3	23111	6.49346	6.47897	6.63372	7.08428	6.80993	6.97039	2.28797	0.419483	1.33745
ILMN_1814022	NR1H3	nuclear receptor subfamily 1, group H, member 3 (NR1H3)	LXR-a; LXRA; RLD-1	NM_005693.1	10062	6.24603	6.34873	6.34518	6.77873	6.66107	6.75889	3.01291	0.419583	1.33754
ILMN_1651610	LOC730525	PREDICTED: hypothetical protein LOC730525 (LOC730525)		XM_001126202.1	730525	6.92244	6.98071	6.9507	7.26397	7.35491	7.49426	2.64412	0.419764	1.33771
ILMN_1910180		cDNA: FLJ21027 fis, clone CAE07110			NA	6.07039	6.05745	6.15987	6.29278	6.58496	6.66959	2.01566	0.419876	1.33781
ILMN_1775743	BTG1	B-cell translocation gene 1, anti-proliferative (BTG1)		NM_001731.1	694	9.88783	9.87036	9.95463	10.3498	10.1943	10.4293	2.57227	0.420191	1.3381
ILMN_1898682		mRNA; cDNA DKFZp779F0411 (from clone DKFZp779F0411)			NA	7.12102	7.29094	7.25739	7.61618	7.56529	7.74886	2.54491	0.420331	1.33823
ILMN_1751708	ITM2B	integral membrane protein 2B (ITM2B)	E3-16; BRICD2B; FBD; E25B; BRI; BRI2; ABRI	NM_021999.2	9445	11.6939	11.8192	11.7771	12.4947	11.9792	12.0792	1.67207	0.420993	1.33885
ILMN_3263974	KRT18P13	PREDICTED: keratin 18 pseudogene 13 (KRT18P13)		XM_001726959.1	392371	8.30287	8.20065	8.37938	8.69836	8.72894	8.71905	2.96048	0.421149	1.33899
ILMN_1809894	TMEM117	transmembrane protein 117 (TMEM117)	DKFZp434K2435	NM_032256.1	84216	5.34696	5.06178	5.43962	5.82782	5.60881	5.67525	1.90931	0.421174	1.33902
ILMN_1700310	SDCBP2	syndecan binding protein (syntenin) 2 (SDCBP2), transcript variant 1	SITAC18; FLJ12256; ST-2	NM_080489.3	27111	5.18587	5.22497	5.1416	5.51728	5.66107	5.63807	3.00114	0.421329	1.33916
ILMN_1773059	GPR124	G protein-coupled receptor 124 (GPR124)	DKFZp434C211; TEM5; DKFZp434J0911; KIAA1531; FLJ14390	NM_032777.6	25960	6.23074	6.18785	6.23074	6.75087	6.61029	6.55305	2.80723	0.421628	1.33944
ILMN_1761833	SLC40A1	solute carrier family 40 (iron-regulated transporter), member 1 (SLC40A1)	IREG1; HFE4; MST079; FPN1; MTP1; MSTP079; SLC11A3	NM_014585.4	30061	5.1416	5.42626	5.41954	5.61176	5.73606	5.90448	1.95055	0.421637	1.33945
ILMN_1665100	PTGS1	prostaglandin-endoperoxide synthase 1 (prostaglandin G/H synthase and cyclooxygenase) (PTGS1), transcript variant 1	PCOX1; PHS1; PGHS1; COX1; PGHS-1; PGG/HS; PTGHS; COX3	NM_000962.2	5742	6.14771	5.73064	5.63227	6.24603	6.27612	6.25739	1.70592	0.422973	1.34069
ILMN_2066348	HERPUD2	HERPUD family member 2 (HERPUD2)	FLJ22313	NM_022373.3	64224	6.38716	6.27798	6.53294	7.09908	6.59842	6.76951	1.66431	0.422979	1.34069
ILMN_1903159		cDNA FLJ42306 fis, clone TRACH2001646			NA	6.58646	6.73064	6.74551	7.42962	6.8125	7.08958	1.537	0.423029	1.34074
ILMN_1733756	COL12A1	collagen, type XII, alpha 1 (COL12A1), transcript variant short	BA209D8.1; DJ234P15.1; COL12A1L	NM_080645.2	1303	6.8125	6.51728	6.51728	7.06178	6.93546	7.11894	2.09368	0.423042	1.34075
ILMN_1805773	ART4	ADP-ribosyltransferase 4 (Dombrock blood group) (ART4)	DOK1; CD297; DO	NM_021071.2	420	5.31107	5.58496	5.40599	6.00675	5.83794	5.72792	2.07792	0.42353	1.3412
ILMN_1740512	MGC39900	PREDICTED: hypothetical protein MGC39900 (MGC39900)		XM_936687.1	286527	7.71425	7.59021	7.91588	8.23314	7.9571	8.30104	1.83109	0.423648	1.34131
ILMN_1784753	PAIP2	poly(A) binding protein interacting protein 2 (PAIP2), transcript variant 1	PAIP2A; MGC72018	NM_001033112.1	51247	9.92896	9.95899	9.95797	10.4997	10.1025	10.515	1.88265	0.423778	1.34144
ILMN_1770818	LOC642342	PREDICTED: similar to Contactin-associated protein-like 3 precursor (Cell recognition molecule Caspr3) (LOC642342)		XM_925876.1	642342	5.95187	5.82528	5.99095	6.49025	6.17592	6.37504	2.18467	0.424371	1.34199
ILMN_1748124	TSC22D3	TSC22 domain family, member 3 (TSC22D3), transcript variant 1	hDIP; DIP; DKFZp313A1123; DSIPI; TSC-22R; GILZ	NM_198057.2	1831	7.88387	7.83099	7.87836	8.47533	8.20065	8.19081	2.30161	0.424527	1.34213
[truncated: 571 more rows]
