# Supplementary material for: The Long Non-Coding HOTAIR Is Modulated by Cyclic Stretch and WNT/β-CATENIN in Human Aortic Valve Cells and Is a Novel Repressor of Calcification Genes
Source: PLoS One. 2014 May 1;9(5):e96577. doi: 10.1371/journal.pone.0096577 (PMC4006892; doi:10.1371/journal.pone.0096577)
Supplement: Dataset S2 — Excel file contain list of Biologic Process GO terms modulated by HOTAIR siRNA. (XLSX) [file pone.0096577.s003.xlsx]

GO ID	Biological Process	Bonferroni p-value
51128	regulation of cellular component organization	3.61169211E-16
9605	response to external stimulus	1.34185308E-15
9611	response to wounding	2.08321011E-14
32879	regulation of localization	7.39896967E-14
40011	locomotion	1.24569747E-13
16477	cell migration	3.56425637E-13
42127	regulation of cell proliferation	4.37603648E-13
6928	cellular component movement	9.35493003E-13
48870	cell motility	3.08125292E-12
51674	localization of cell	3.08125292E-12
1944	vasculature development	1.81523581E-11
48584	positive regulation of response to stimulus	5.77088100E-11
1568	blood vessel development	9.12849102E-11
2000026	regulation of multicellular organismal development	1.23362320E-10
72358	cardiovascular system development	1.28520222E-10
72359	circulatory system development	1.28520222E-10
51130	positive regulation of cellular component organization	1.72827266E-10
48468	cell development	2.27969033E-10
7155	cell adhesion	3.02832759E-10
22610	biological adhesion	3.60343227E-10
9719	response to endogenous stimulus	7.73386244E-10
43933	macromolecular complex subunit organization	9.28832067E-10
32270	positive regulation of cellular protein metabolic process	9.80639792E-10
71822	protein complex subunit organization	9.91563942E-10
30334	regulation of cell migration	1.69947567E-09
42060	wound healing	2.16942109E-09
40012	regulation of locomotion	2.20416330E-09
51247	positive regulation of protein metabolic process	3.27833760E-09
8284	positive regulation of cell proliferation	4.17474233E-09
2000145	regulation of cell motility	4.36065939E-09
48514	blood vessel morphogenesis	5.20354337E-09
70271	protein complex biogenesis	5.51066792E-09
51270	regulation of cellular component movement	5.52083135E-09
6461	protein complex assembly	9.82192105E-09
31401	positive regulation of protein modification process	1.00721831E-08
10562	positive regulation of phosphorus metabolic process	1.07590639E-08
45937	positive regulation of phosphate metabolic process	1.07590639E-08
6508	proteolysis	2.00215364E-08
65003	macromolecular complex assembly	4.24779074E-08
1525	angiogenesis	5.90378697E-08
22403	cell cycle phase	7.80654545E-08
22402	cell cycle process	8.47274606E-08
42325	regulation of phosphorylation	8.60806182E-08
51174	regulation of phosphorus metabolic process	8.64861818E-08
278	mitotic cell cycle	8.95073740E-08
45595	regulation of cell differentiation	9.65615996E-08
1934	positive regulation of protein phosphorylation	1.76770428E-07
71495	cellular response to endogenous stimulus	2.61005084E-07
42327	positive regulation of phosphorylation	2.79574522E-07
19220	regulation of phosphate metabolic process	3.52124573E-07
31399	regulation of protein modification process	3.79502296E-07
9628	response to abiotic stimulus	4.37309438E-07
8217	regulation of blood pressure	4.81237521E-07
8015	blood circulation	5.57145995E-07
6082	organic acid metabolic process	5.78370248E-07
3013	circulatory system process	6.00287251E-07
279	M phase	7.33310060E-07
51049	regulation of transport	8.55664211E-07
16310	phosphorylation	8.59725787E-07
1901700	response to oxygen-containing compound	8.64153378E-07
70482	response to oxygen levels	9.60827492E-07
23056	positive regulation of signaling	9.67003871E-07
3008	system process	1.02351135E-06
10647	positive regulation of cell communication	1.22884921E-06
43436	oxoacid metabolic process	1.52843973E-06
51301	cell division	1.58841544E-06
1932	regulation of protein phosphorylation	1.76723404E-06
87	M phase of mitotic cell cycle	1.86855937E-06
51094	positive regulation of developmental process	2.02372007E-06
9967	positive regulation of signal transduction	2.02794831E-06
70848	response to growth factor stimulus	2.17753882E-06
6629	lipid metabolic process	2.29099419E-06
48585	negative regulation of response to stimulus	2.38096209E-06
6952	defense response	2.79774599E-06
7186	G-protein coupled receptor signaling pathway	3.09502070E-06
6954	inflammatory response	3.14915383E-06
43632	modification-dependent macromolecule catabolic process	3.15744819E-06
36293	response to decreased oxygen levels	3.27956036E-06
9057	macromolecule catabolic process	3.29528280E-06
6935	chemotaxis	3.78651544E-06
42330	taxis	3.78651544E-06
44093	positive regulation of molecular function	3.87286354E-06
10498	proteasomal protein catabolic process	3.88621038E-06
51603	proteolysis involved in cellular protein catabolic process	4.02722071E-06
6468	protein phosphorylation	4.08281676E-06
32101	regulation of response to external stimulus	4.21304549E-06
7167	enzyme linked receptor protein signaling pathway	4.46805234E-06
280	nuclear division	4.59403827E-06
7067	mitosis	4.59403827E-06
71363	cellular response to growth factor stimulus	5.21074480E-06
19752	carboxylic acid metabolic process	5.44563818E-06
904	cell morphogenesis involved in differentiation	6.09700282E-06
1666	response to hypoxia	6.16730358E-06
19941	modification-dependent protein catabolic process	6.39625023E-06
43161	proteasomal ubiquitin-dependent protein catabolic process	7.98582550E-06
60284	regulation of cell development	8.00832004E-06
10564	regulation of cell cycle process	8.35989522E-06
43085	positive regulation of catalytic activity	8.63846344E-06
6511	ubiquitin-dependent protein catabolic process	9.56373606E-06
51050	positive regulation of transport	1.27679959E-05
51272	positive regulation of cellular component movement	1.54040881E-05
44257	cellular protein catabolic process	1.54767167E-05
51347	positive regulation of transferase activity	1.69322684E-05
40017	positive regulation of locomotion	1.85923127E-05
48285	organelle fission	1.98252565E-05
9968	negative regulation of signal transduction	2.35022017E-05
51259	protein oligomerization	2.52258269E-05
22008	neurogenesis	2.67034084E-05
2000147	positive regulation of cell motility	2.71757453E-05
50878	regulation of body fluid levels	2.77093604E-05
30163	protein catabolic process	2.83525296E-05
60341	regulation of cellular localization	3.02818153E-05
44265	cellular macromolecule catabolic process	3.26061781E-05
33674	positive regulation of kinase activity	3.51350573E-05
32989	cellular component morphogenesis	3.87683431E-05
30182	neuron differentiation	4.68731741E-05
1935	endothelial cell proliferation	5.13146333E-05
18193	peptidyl-amino acid modification	5.13327614E-05
51338	regulation of transferase activity	5.99356281E-05
23057	negative regulation of signaling	6.11921278E-05
48699	generation of neurons	6.41004735E-05
10648	negative regulation of cell communication	6.90332599E-05
72012	glomerulus vasculature development	6.95442213E-05
16049	cell growth	6.95498311E-05
30335	positive regulation of cell migration	7.77332607E-05
43549	regulation of kinase activity	7.80735863E-05
51726	regulation of cell cycle	8.28345146E-05
80134	regulation of response to stress	8.28486882E-05
5975	carbohydrate metabolic process	8.29673008E-05
90288	negative regulation of cellular response to growth factor stimulus	1.00008423E-04
61437	renal system vasculature development	1.00862868E-04
61440	kidney vasculature development	1.00862868E-04
72001	renal system development	1.24482904E-04
1822	kidney development	1.28664702E-04
50900	leukocyte migration	1.29502878E-04
60429	epithelium development	1.38382660E-04
44255	cellular lipid metabolic process	1.55747693E-04
6955	immune response	1.56006703E-04
8285	negative regulation of cell proliferation	1.57914663E-04
51960	regulation of nervous system development	1.86458245E-04
61041	regulation of wound healing	2.00972761E-04
50795	regulation of behavior	2.09132908E-04
7596	blood coagulation	2.12259489E-04
7599	hemostasis	2.18414163E-04
7267	cell-cell signaling	2.32048507E-04
42592	homeostatic process	2.37435685E-04
9887	organ morphogenesis	2.37955042E-04
90092	regulation of transmembrane receptor protein serine/threonine kinase signaling pathway	2.71992321E-04
30195	negative regulation of blood coagulation	2.75688915E-04
1900047	negative regulation of hemostasis	2.75688915E-04
50920	regulation of chemotaxis	2.89353775E-04
50817	coagulation	3.04855435E-04
1655	urogenital system development	3.20257532E-04
32880	regulation of protein localization	3.37223988E-04
40007	growth	3.46900924E-04
70201	regulation of establishment of protein localization	3.49602458E-04
90287	regulation of cellular response to growth factor stimulus	3.63763887E-04
32835	glomerulus development	3.64387961E-04
22603	regulation of anatomical structure morphogenesis	3.78448458E-04
50679	positive regulation of epithelial cell proliferation	3.83096922E-04
1837	epithelial to mesenchymal transition	3.93056485E-04
32787	monocarboxylic acid metabolic process	4.00229939E-04
19725	cellular homeostasis	4.03444603E-04
7346	regulation of mitotic cell cycle	4.10638808E-04
45860	positive regulation of protein kinase activity	4.28593572E-04
30193	regulation of blood coagulation	4.40651376E-04
1900046	regulation of hemostasis	4.40651376E-04
48878	chemical homeostasis	4.49613231E-04
31589	cell-substrate adhesion	4.89674450E-04
50819	negative regulation of coagulation	5.10911865E-04
14070	response to organic cyclic compound	5.20119094E-04
30198	extracellular matrix organization	5.59351523E-04
43062	extracellular structure organization	5.59351523E-04
50730	regulation of peptidyl-tyrosine phosphorylation	5.63607900E-04
72330	monocarboxylic acid biosynthetic process	5.71756158E-04
51240	positive regulation of multicellular organismal process	5.95051388E-04
7088	regulation of mitosis	6.04784349E-04
51783	regulation of nuclear division	6.04784349E-04
902	cell morphogenesis	6.60422025E-04
7178	transmembrane receptor protein serine/threonine kinase signaling pathway	7.08504114E-04
7243	intracellular protein kinase cascade	7.18309777E-04
14031	mesenchymal cell development	8.35297920E-04
50673	epithelial cell proliferation	8.56200990E-04
1775	cell activation	8.66701768E-04
3014	renal system process	8.85924208E-04
50818	regulation of coagulation	8.94874043E-04
61061	muscle structure development	9.34569922E-04
44711	single-organism biosynthetic process	9.96642048E-04
45859	regulation of protein kinase activity	1.00445957E-03
51493	regulation of cytoskeleton organization	1.04844850E-03
7010	cytoskeleton organization	1.07118522E-03
17015	regulation of transforming growth factor beta receptor signaling pathway	1.10155623E-03
6631	fatty acid metabolic process	1.15819555E-03
6897	endocytosis	1.27397117E-03
43542	endothelial cell migration	1.30811648E-03
1901342	regulation of vasculature development	1.40399451E-03
1501	skeletal system development	1.44050538E-03
71559	response to transforming growth factor beta stimulus	1.65460759E-03
16337	cell-cell adhesion	1.76495430E-03
45765	regulation of angiogenesis	1.78558147E-03
7017	microtubule-based process	1.86273840E-03
48762	mesenchymal cell differentiation	2.02212320E-03
61448	connective tissue development	2.18045549E-03
9607	response to biotic stimulus	2.18363269E-03
50926	regulation of positive chemotaxis	2.20090640E-03
50927	positive regulation of positive chemotaxis	2.20090640E-03
55082	cellular chemical homeostasis	2.27914983E-03
6633	fatty acid biosynthetic process	2.29858584E-03
44283	small molecule biosynthetic process	2.40232074E-03
31175	neuron projection development	2.46809213E-03
46903	secretion	2.49312609E-03
33043	regulation of organelle organization	2.56156549E-03
3158	endothelium development	2.57704593E-03
1901566	organonitrogen compound biosynthetic process	2.62273289E-03
50921	positive regulation of chemotaxis	2.65341904E-03
30308	negative regulation of cell growth	2.69970088E-03
60485	mesenchyme development	2.75882659E-03
72006	nephron development	2.93905567E-03
71560	cellular response to transforming growth factor beta stimulus	2.98047392E-03
30168	platelet activation	3.15761822E-03
48771	tissue remodeling	3.22719640E-03
1936	regulation of endothelial cell proliferation	3.30721028E-03
1901137	carbohydrate derivative biosynthetic process	3.34686087E-03
48666	neuron development	3.36100324E-03
10941	regulation of cell death	3.43492813E-03
51223	regulation of protein transport	3.62270512E-03
50767	regulation of neurogenesis	3.82793811E-03
2682	regulation of immune system process	3.92093090E-03
10594	regulation of endothelial cell migration	3.94870853E-03
30325	adrenal gland development	3.95195372E-03
18108	peptidyl-tyrosine phosphorylation	4.02026344E-03
7568	aging	4.10066452E-03
48729	tissue morphogenesis	4.19299677E-03
33993	response to lipid	4.26094886E-03
1901698	response to nitrogen compound	4.42713266E-03
48660	regulation of smooth muscle cell proliferation	4.53489833E-03
30512	negative regulation of transforming growth factor beta receptor signaling pathway	4.69939550E-03
10638	positive regulation of organelle organization	4.79274755E-03
16053	organic acid biosynthetic process	5.12599666E-03
46394	carboxylic acid biosynthetic process	5.12599666E-03
18212	peptidyl-tyrosine modification	5.21414774E-03
43067	regulation of programmed cell death	5.32968063E-03
10627	regulation of intracellular protein kinase cascade	5.35133900E-03
7610	behavior	5.43795619E-03
44723	single-organism carbohydrate metabolic process	5.48403757E-03
48520	positive regulation of behavior	6.19253749E-03
10740	positive regulation of intracellular protein kinase cascade	6.54384214E-03
51260	protein homooligomerization	7.17492960E-03
42981	regulation of apoptotic process	7.88908452E-03
7200	phospholipase C-activating G-protein coupled receptor signaling pathway	8.05743877E-03
30177	positive regulation of Wnt receptor signaling pathway	8.26685037E-03
7409	axonogenesis	8.30729399E-03
32940	secretion by cell	8.31814483E-03
6873	cellular ion homeostasis	8.43245909E-03
50678	regulation of epithelial cell proliferation	8.48745741E-03
45597	positive regulation of cell differentiation	8.73217080E-03
7566	embryo implantation	9.24968161E-03
10799	regulation of peptidyl-threonine phosphorylation	9.99509078E-03
48659	smooth muscle cell proliferation	1.01913437E-02
51046	regulation of secretion	1.02055864E-02
60389	pathway-restricted SMAD protein phosphorylation	1.02855628E-02
48812	neuron projection morphogenesis	1.05286613E-02
1558	regulation of cell growth	1.07749812E-02
1900180	regulation of protein localization to nucleus	1.09510459E-02
1937	negative regulation of endothelial cell proliferation	1.12574594E-02
7179	transforming growth factor beta receptor signaling pathway	1.12879481E-02
44087	regulation of cellular component biogenesis	1.17051592E-02
90101	negative regulation of transmembrane receptor protein serine/threonine kinase signaling pathway	1.24584073E-02
30155	regulation of cell adhesion	1.25005487E-02
7565	female pregnancy	1.25525668E-02
18209	peptidyl-serine modification	1.26532735E-02
9612	response to mechanical stimulus	1.26985880E-02
44706	multi-multicellular organism process	1.28019033E-02
18210	peptidyl-threonine modification	1.29901972E-02
46456	icosanoid biosynthetic process	1.34572089E-02
1901570	fatty acid derivative biosynthetic process	1.34572089E-02
30030	cell projection organization	1.35098286E-02
60840	artery development	1.35478303E-02
1816	cytokine production	1.35906888E-02
51241	negative regulation of multicellular organismal process	1.37862237E-02
35967	cellular response to topologically incorrect protein	1.38684884E-02
6636	unsaturated fatty acid biosynthetic process	1.43896537E-02
10563	negative regulation of phosphorus metabolic process	1.44737978E-02
45936	negative regulation of phosphate metabolic process	1.44737978E-02
9790	embryo development	1.46478862E-02
1901135	carbohydrate derivative metabolic process	1.46481851E-02
3018	vascular process in circulatory system	1.48380240E-02
9725	response to hormone stimulus	1.49817606E-02
45596	negative regulation of cell differentiation	1.54586984E-02
50654	chondroitin sulfate proteoglycan metabolic process	1.55999372E-02
42306	regulation of protein import into nucleus	1.56140774E-02
33157	regulation of intracellular protein transport	1.57653019E-02
70647	protein modification by small protein conjugation or removal	1.58065613E-02
51048	negative regulation of secretion	1.58361979E-02
51325	interphase	1.63196567E-02
51093	negative regulation of developmental process	1.63807198E-02
60393	regulation of pathway-restricted SMAD protein phosphorylation	1.70319565E-02
51336	regulation of hydrolase activity	1.77939218E-02
1763	morphogenesis of a branching structure	1.79906674E-02
43405	regulation of MAP kinase activity	1.86958797E-02
51345	positive regulation of hydrolase activity	1.89597346E-02
45664	regulation of neuron differentiation	1.89741999E-02
7059	chromosome segregation	1.91340875E-02
45786	negative regulation of cell cycle	1.94104556E-02
1957	intramembranous ossification	2.05279179E-02
36072	direct ossification	2.05279179E-02
34097	response to cytokine stimulus	2.09490117E-02
6909	phagocytosis	2.10711304E-02
51707	response to other organism	2.16155443E-02
43623	cellular protein complex assembly	2.18058005E-02
50801	ion homeostasis	2.18915213E-02
45926	negative regulation of growth	2.22382750E-02
30802	regulation of cyclic nucleotide biosynthetic process	2.23799609E-02
32269	negative regulation of cellular protein metabolic process	2.24339925E-02
50680	negative regulation of epithelial cell proliferation	2.29788963E-02
51051	negative regulation of transport	2.33445186E-02
7507	heart development	2.38063447E-02
60326	cell chemotaxis	2.38222238E-02
9190	cyclic nucleotide biosynthetic process	2.43156012E-02
52652	cyclic purine nucleotide metabolic process	2.43156012E-02
10595	positive regulation of endothelial cell migration	2.46972162E-02
30808	regulation of nucleotide biosynthetic process	2.62131114E-02
1900371	regulation of purine nucleotide biosynthetic process	2.62131114E-02
6874	cellular calcium ion homeostasis	2.63591297E-02
30509	BMP signaling pathway	2.65473742E-02
50918	positive chemotaxis	2.69691069E-02
97305	response to alcohol	2.80358493E-02
10460	positive regulation of heart rate	2.81853229E-02
45823	positive regulation of heart contraction	2.86020748E-02
44702	single organism reproductive process	2.90743783E-02
51222	positive regulation of protein transport	2.96808314E-02
33559	unsaturated fatty acid metabolic process	3.00211720E-02
50877	neurological system process	3.08651235E-02
51216	cartilage development	3.12067103E-02
32386	regulation of intracellular transport	3.12858298E-02
6029	proteoglycan metabolic process	3.21517065E-02
34620	cellular response to unfolded protein	3.25425118E-02
6984	ER-nucleus signaling pathway	3.28249708E-02
6022	aminoglycan metabolic process	3.30382399E-02
50930	induction of positive chemotaxis	3.37823182E-02
10243	response to organic nitrogen	3.41502540E-02
44092	negative regulation of molecular function	3.45869549E-02
8610	lipid biosynthetic process	3.46558169E-02
6875	cellular metal ion homeostasis	3.54162268E-02
6944	cellular membrane fusion	3.66289951E-02
44057	regulation of system process	3.67142521E-02
6690	icosanoid metabolic process	3.84227261E-02
1901568	fatty acid derivative metabolic process	3.84227261E-02
30111	regulation of Wnt receptor signaling pathway	3.89192104E-02
55065	metal ion homeostasis	3.91339697E-02
51248	negative regulation of protein metabolic process	4.08478491E-02
61025	membrane fusion	4.09762450E-02
61383	trabecula morphogenesis	4.13260646E-02
51054	positive regulation of DNA metabolic process	4.14274707E-02
10717	regulation of epithelial to mesenchymal transition	4.16458771E-02
55001	muscle cell development	4.21280824E-02
2684	positive regulation of immune system process	4.21951599E-02
19216	regulation of lipid metabolic process	4.23553213E-02
48667	cell morphogenesis involved in neuron differentiation	4.44120765E-02
51047	positive regulation of secretion	4.54176143E-02
165	MAPK cascade	4.64225970E-02
9991	response to extracellular stimulus	4.71422747E-02
30799	regulation of cyclic nucleotide metabolic process	4.76033092E-02
71900	regulation of protein serine/threonine kinase activity	4.87147607E-02
9187	cyclic nucleotide metabolic process	4.96796109E-02
35150	regulation of tube size	4.98094000E-02
50880	regulation of blood vessel size	4.98094000E-02
