# Supplementary material for: The Long Non-Coding HOTAIR Is Modulated by Cyclic Stretch and WNT/β-CATENIN in Human Aortic Valve Cells and Is a Novel Repressor of Calcification Genes
Source: PLoS One. 2014 May 1;9(5):e96577. doi: 10.1371/journal.pone.0096577 (PMC4006892; doi:10.1371/journal.pone.0096577)
Supplement: Dataset S3 — Excel file contain list of Molecular Function GO terms modulated by HOTAIR siRNA. (XLS) [file pone.0096577.s004.xls]

GO ID	Molecular Function	Bonferroni p-value
5102	receptor binding	5.66281607E-14
5539	glycosaminoglycan binding	1.36349465E-11
97367	carbohydrate derivative binding	4.42424361E-11
8201	heparin binding	1.41599343E-09
4872	receptor activity	1.11658789E-08
1901681	sulfur compound binding	3.81079275E-08
48407	platelet-derived growth factor binding	2.04529726E-07
4888	transmembrane signaling receptor activity	3.57031325E-07
38023	signaling receptor activity	9.05826880E-07
4871	signal transducer activity	3.12914722E-06
60089	molecular transducer activity	3.12914722E-06
19899	enzyme binding	4.25357757E-06
5125	cytokine activity	6.56280899E-05
16879	ligase activity, forming carbon-nitrogen bonds	6.96834031E-05
19838	growth factor binding	7.29756721E-05
8083	growth factor activity	3.53011506E-04
5201	extracellular matrix structural constituent	6.32701733E-04
16881	acid-amino acid ligase activity	7.42736214E-04
42802	identical protein binding	1.39948330E-03
19900	kinase binding	2.02293089E-03
16874	ligase activity	2.25999206E-03
5525	GTP binding	2.30226060E-03
19001	guanyl nucleotide binding	2.34109140E-03
32561	guanyl ribonucleotide binding	2.34109140E-03
1664	G-protein coupled receptor binding	3.12727899E-03
5198	structural molecule activity	3.47011792E-03
46982	protein heterodimerization activity	3.70514137E-03
16209	antioxidant activity	4.13053716E-03
5126	cytokine receptor binding	4.16571414E-03
17127	cholesterol transporter activity	6.54251175E-03
4842	ubiquitin-protein ligase activity	6.54386031E-03
46983	protein dimerization activity	6.86240150E-03
5518	collagen binding	9.83485766E-03
5509	calcium ion binding	1.22206127E-02
16773	phosphotransferase activity, alcohol group as acceptor	1.26678096E-02
15248	sterol transporter activity	1.28941769E-02
19901	protein kinase binding	1.53966434E-02
4930	G-protein coupled receptor activity	1.59308109E-02
19787	small conjugating protein ligase activity	1.71596576E-02
52689	carboxylic ester hydrolase activity	1.88405327E-02
42277	peptide binding	2.00702716E-02
4175	endopeptidase activity	2.49892976E-02
19955	cytokine binding	2.97621936E-02
30246	carbohydrate binding	4.00306620E-02
5178	integrin binding	4.43678796E-02
